# Supplementary material for: In situ single-crystal X-ray diffraction of olivine inclusion in diamond from Shandong, China: implications for the depth of diamond formation
Source: Copernicus journal article supplement (doi:10.5194/ejm-35-361-2023), 2023-05-31
Supplement: Supplementary file 1 [file ejm-35-361-2023-supplement.zip]

Archive with 3 entries (3 files):
- in_situ_rev_edited.cif
- released_rev_edited.cif
- ejm-35-361-2023-supplement-title-page.pdf
