# Supplementary material for: In situ single-crystal X-ray diffraction of olivine inclusion in diamond from Shandong, China: implications for the depth of diamond formation
Source: Copernicus journal article supplement (doi:10.5194/ejm-35-361-2023), 2023-05-31
Supplement: Supplementary file 1 [file ejm-35-361-2023-supplement.zip › ejm-35-361-2023-supplement-title-page.pdf]

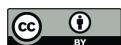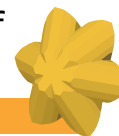

*Supplement of*

**In situ single-crystal X-ray diffraction of olivine inclusion in diamond from Shandong, China: implications for the depth of diamond formation**

**Yanjuan Wang et al.**

*Correspondence to:* Fabrizio Nestola ([fabrizio.nestola@unipd.it](mailto:fabrizio.nestola@unipd.it))

- [ejm-35-361-2023-supplement-title-page.pdf](#)
- [in\\_situ\\_rev\\_edited.cif](#)
- [released\\_rev\\_edited.cif](#)

The copyright of individual parts of the supplement might differ from the article licence.
