# Supplementary material for: In situ single-crystal X-ray diffraction of olivine inclusion in diamond from Shandong, China: implications for the depth of diamond formation
Source: Copernicus journal article supplement (doi:10.5194/ejm-35-361-2023), 2023-05-31
Supplement: Supplementary file 1 [file ejm-35-361-2023-supplement.zip › in_situ_rev_edited.cif]

 
data_changma_olivine_insitu
 
_audit_creation_method            'SHELXL-2018/3'
_shelx_SHELXL_version_number      '2018/3'
_chemical_name_systematic         ?
_chemical_name_common             ?
_chemical_melting_point           ?
_chemical_formula_moiety          ?
_chemical_formula_sum
 'Fe0.173 Mg1.827 O4 Si1' 
_chemical_formula_weight          146.12

loop_
 _atom_type_symbol
 _atom_type_description
 _atom_type_scat_dispersion_real
 _atom_type_scat_dispersion_imag
 _atom_type_scat_source
 'O'  'O'   0.0106   0.0060
 'International Tables Vol C Tables 4.2.6.8 and 6.1.1.4'
 'Si'  'Si'   0.0817   0.0704
 'International Tables Vol C Tables 4.2.6.8 and 6.1.1.4'
 'Mg'  'Mg+2'   0.0420   0.0360
 'International Tables Vol C Tables 4.2.6.8 and 6.1.1.4'
 'Si'  'Si+4'   0.0720   0.0710
 'International Tables Vol C Tables 4.2.6.8 and 6.1.1.4'
 'Fe'  'Fe+2'   0.3010   0.8450
 'International Tables Vol C Tables 4.2.6.8 and 6.1.1.4'
 'O'  'O2-'   0.0080   0.0060
 'International Tables Vol C Tables 4.2.6.8 and 6.1.1.4'
 
_space_group_crystal_system       orthorhombic
_space_group_IT_number            62
_space_group_name_H-M_alt         Pbnm
_space_group_name_Hall            -P2c2ab
 
_shelx_space_group_comment
;
The symmetry employed for this shelxl refinement is uniquely defined
by the following loop, which should always be used as a source of
symmetry information in preference to the above space-group names.
They are only intended as comments.
;
 
loop_
 _space_group_symop_operation_xyz
 'x, y, z'
 '-x, -y, z+1/2'
 'x+1/2, -y+1/2, -z'
 '-x+1/2, y+1/2, -z+1/2'
 '-x, -y, -z'
 'x, y, -z-1/2'
 '-x-1/2, y-1/2, z'
 'x-1/2, -y-1/2, z-1/2'
 
_cell_length_a                    4.7541(10)
_cell_length_b                    10.186(2)
_cell_length_c                    5.982(4)
_cell_angle_alpha                 90
_cell_angle_beta                  90
_cell_angle_gamma                 90
_cell_volume                      289.7(2)
_cell_formula_units_Z             4
_cell_measurement_temperature     293(2)
_cell_measurement_reflns_used     803
_cell_measurement_theta_min       3
_cell_measurement_theta_max       31.5
 
_exptl_crystal_description        irregular
_exptl_crystal_colour             colorless
_exptl_crystal_density_meas       ?
_exptl_crystal_density_method     ?
_exptl_crystal_density_diffrn     3.351         
_exptl_crystal_F_000              290
__exptl_transmission_factor_min    0.812
_exptl_transmission_factor_max    0.910
_exptl_crystal_size_max           0.110
_exptl_crystal_size_mid           0.050
_exptl_crystal_size_min           0.050
_exptl_absorpt_coefficient_mu     1.857
_shelx_estimated_absorpt_T_min    ?
_shelx_estimated_absorpt_T_max    ?
_exptl_absorpt_correction_type    multi-scan
_exptl_absorpt_correction_T_min   0.548
_exptl_absorpt_correction_T_max   1.000
_exptl_absorpt_process_details    ?
_exptl_absorpt_special_details    ?
_diffrn_ambient_temperature       293(2)
_diffrn_radiation_wavelength      0.71073
_diffrn_radiation_type            MoK\a
_diffrn_source                    'micro-focus sealed X-ray tube'
_diffrn_measurement_device_type   'SuperNova (Mo) X-ray Source'
_diffrn_measurement_method        '\w scans'
_diffrn_detector_area_resol_mean  ?
_diffrn_reflns_number             4523
_diffrn_reflns_av_unetI/netI      0.0121
_diffrn_reflns_av_R_equivalents   0.0271
_diffrn_reflns_limit_h_min        -6
_diffrn_reflns_limit_h_max        6
_diffrn_reflns_limit_k_min        -15
_diffrn_reflns_limit_k_max        14
_diffrn_reflns_limit_l_min        -8
_diffrn_reflns_limit_l_max        8
_diffrn_reflns_theta_min          4.001
_diffrn_reflns_theta_max          31.763
_diffrn_reflns_theta_full         25.242
_diffrn_measured_fraction_theta_max   0.942
_diffrn_measured_fraction_theta_full  0.986
_diffrn_reflns_Laue_measured_fraction_max    0.942
_diffrn_reflns_Laue_measured_fraction_full   0.986
_diffrn_reflns_point_group_measured_fraction_max   0.942
_diffrn_reflns_point_group_measured_fraction_full  0.986
_reflns_number_total              503
_reflns_number_gt                 472
_reflns_threshold_expression      'I > 2\s(I)'
_reflns_Friedel_coverage          0.000
_reflns_Friedel_fraction_max      .
_reflns_Friedel_fraction_full     .
 
_reflns_special_details
;
 Reflections were merged by SHELXL according to the crystal
 class for the calculation of statistics and refinement.
 
 _reflns_Friedel_fraction is defined as the number of unique
 Friedel pairs measured divided by the number that would be
 possible theoretically, ignoring centric projections and
 systematic absences.
;
 
_computing_data_collection        ?
_computing_cell_refinement        ?
_computing_data_reduction         ?
_computing_structure_solution     ?
_computing_structure_refinement 'SHELXL-2018/3 (Sheldrick, 2018)'
_computing_molecular_graphics     ?
_computing_publication_material   ?
_refine_special_details           ?
_refine_ls_structure_factor_coef  Fsqd
_refine_ls_matrix_type            full
_refine_ls_weighting_scheme       calc
_refine_ls_weighting_details
'w=1/[\s^2^(Fo^2^)+(0.0246P)^2^+0.0680P] where P=(Fo^2^+2Fc^2^)/3'
_atom_sites_solution_primary      ?
_atom_sites_solution_secondary    ?
_atom_sites_solution_hydrogens    .
_refine_ls_hydrogen_treatment     undef
_refine_ls_extinction_method      'SHELXL-2018/3 (Sheldrick 2018)'
_refine_ls_extinction_coef        0.027(4)
_refine_ls_extinction_expression
 'Fc^*^=kFc[1+0.001xFc^2^\l^3^/sin(2\q)]^-1/4^'
_refine_ls_number_reflns          503
_refine_ls_number_parameters      53
_refine_ls_number_restraints      6
_refine_ls_R_factor_all           0.0153
_refine_ls_R_factor_gt            0.0138
_refine_ls_wR_factor_ref          0.0362
_refine_ls_wR_factor_gt           0.0357
_refine_ls_goodness_of_fit_ref    1.005
_refine_ls_restrained_S_all       1.001
_refine_ls_shift/su_max           0.714
_refine_ls_shift/su_mean          0.141
 
loop_
 _atom_site_label
 _atom_site_type_symbol
 _atom_site_fract_x
 _atom_site_fract_y
 _atom_site_fract_z
 _atom_site_U_iso_or_equiv
 _atom_site_adp_type
 _atom_site_occupancy
 _atom_site_site_symmetry_order  
 _atom_site_calc_flag
 _atom_site_refinement_flags_posn
 _atom_site_refinement_flags_adp
 _atom_site_refinement_flags_occupancy
 _atom_site_disorder_assembly
 _atom_site_disorder_group
SiA Si 0.42661(6) 0.09429(3) 0.250000 0.00399(10) Uani 0.642(16) 2 d S T P . .
SiB Si+4 0.42661(6) 0.09429(3) 0.250000 0.00399(10) Uani 0.357(16) 2 d S T P . .
Fe2 Fe+2 0.99019(7) 0.27765(3) 0.250000 0.00583(13) Uani 0.084(2) 2 d S T P . .
Mg2 Mg+2 0.99019(7) 0.27765(3) 0.250000 0.00583(13) Uani 0.916(3) 2 d S T P . .
Fe1 Fe+2 0.000000 0.000000 0.000000 0.00584(13) Uani 0.089(2) 2 d S . P . .
Mg1 Mg+2 0.000000 0.000000 0.000000 0.00584(13) Uani 0.911(3) 2 d S . P . .
O1A O 0.76607(17) 0.09166(7) 0.250000 0.00544(17) Uani 0.20(2) 2 d S T P . .
O1B O2- 0.76607(17) 0.09166(7) 0.250000 0.00544(17) Uani 0.80(2) 2 d S T P . .
O2A O 0.22075(16) 0.44759(7) 0.250000 0.00542(17) Uani 0.27(2) 2 d S T P . .
O2B O2- 0.22075(16) 0.44759(7) 0.250000 0.00542(17) Uani 0.73(2) 2 d S T P . .
O3A O 0.27826(11) 0.16322(5) 0.03341(9) 0.00615(14) Uani 0.258(19) 1 d . . P . .
O3B O2- 0.27826(11) 0.16322(5) 0.03341(9) 0.00615(14) Uani 0.742(19) 1 d . . P . .
 
loop_
 _atom_site_aniso_label
 _atom_site_aniso_U_11
 _atom_site_aniso_U_22
 _atom_site_aniso_U_33
 _atom_site_aniso_U_23
 _atom_site_aniso_U_13
 _atom_site_aniso_U_12
SiA 0.00267(15) 0.00416(15) 0.00513(16) 0.000 0.000 0.00017(9)
SiB 0.00267(15) 0.00416(15) 0.00513(16) 0.000 0.000 0.00017(9)
Fe2 0.0060(2) 0.00498(19) 0.00652(19) 0.000 0.000 0.00009(11)
Mg2 0.0060(2) 0.00498(19) 0.00652(19) 0.000 0.000 0.00009(11)
Fe1 0.00460(19) 0.00733(18) 0.00558(19) -0.00121(11) -0.00056(11) 0.00000(11)
Mg1 0.00460(19) 0.00733(18) 0.00558(19) -0.00121(11) -0.00056(11) 0.00000(11)
O1A 0.0038(3) 0.0067(3) 0.0058(3) 0.000 0.000 0.0001(3)
O1B 0.0038(3) 0.0067(3) 0.0058(3) 0.000 0.000 0.0001(3)
O2A 0.0047(3) 0.0048(3) 0.0068(4) 0.000 0.000 0.0000(3)
O2B 0.0047(3) 0.0048(3) 0.0068(4) 0.000 0.000 0.0000(3)
O3A 0.0052(2) 0.0069(3) 0.0063(3) 0.00104(19) -0.0001(2) 0.00031(18)
O3B 0.0052(2) 0.0069(3) 0.0063(3) 0.00104(19) -0.0001(2) 0.00031(18)
 
_geom_special_details
;
 All esds (except the esd in the dihedral angle between two l.s. planes)
 are estimated using the full covariance matrix.  The cell esds are taken
 into account individually in the estimation of esds in distances, angles
 and torsion angles; correlations between esds in cell parameters are only
 used when they are defined by crystal symmetry.  An approximate (isotropic)
 treatment of cell esds is used for estimating esds involving l.s. planes.
;
 
loop_
 _geom_bond_atom_site_label_1
 _geom_bond_atom_site_label_2
 _geom_bond_distance
 _geom_bond_site_symmetry_2
 _geom_bond_publ_flag
SiA O1A 1.6140(9) . ?
SiA O3A 1.6338(9) 6_556 ?
SiA O3A 1.6338(9) . ?
SiA O2A 1.6503(9) 7_655 ?
SiA Fe1 2.6967(7) . ?
SiA Fe1 2.6967(7) 2 ?
SiA Fe2 2.7916(6) 1_455 ?
SiA Mg2 3.2494(8) 7_755 ?
Fe2 O2A 2.0490(9) 1_655 ?
Fe2 O3A 2.0621(11) 3 ?
Fe2 O3A 2.0621(11) 8_666 ?
Fe2 O1A 2.1736(9) . ?
Fe2 O3A 2.2165(8) 6_656 ?
Fe2 O3A 2.2165(8) 1_655 ?
Fe1 O2A 2.0697(9) 7_655 ?
Fe1 O2A 2.0697(9) 3_455 ?
Fe1 O1A 2.0845(9) 5_655 ?
Fe1 O1A 2.0845(9) 1_455 ?
Fe1 O3A 2.1340(6) . ?
Fe1 O3A 2.1340(6) 5 ?
 
loop_
 _geom_angle_atom_site_label_1
 _geom_angle_atom_site_label_2
 _geom_angle_atom_site_label_3
 _geom_angle
 _geom_angle_site_symmetry_1
 _geom_angle_site_symmetry_3
 _geom_angle_publ_flag
O1A SiA O3A 116.02(3) . 6_556 ?
O1A SiA O3A 116.02(3) . . ?
O3A SiA O3A 104.94(6) 6_556 . ?
O1A SiA O2A 114.17(4) . 7_655 ?
O3A SiA O2A 101.88(3) 6_556 7_655 ?
O3A SiA O2A 101.88(3) . 7_655 ?
O1A SiA Fe1 138.25(2) . . ?
O3A SiA Fe1 105.56(4) 6_556 . ?
O3A SiA Fe1 52.31(3) . . ?
O2A SiA Fe1 50.08(2) 7_655 . ?
O1A SiA Fe1 138.25(2) . 2 ?
O3A SiA Fe1 52.31(3) 6_556 2 ?
O3A SiA Fe1 105.56(4) . 2 ?
O2A SiA Fe1 50.08(2) 7_655 2 ?
Fe1 SiA Fe1 67.36(4) . 2 ?
O1A SiA Fe2 138.96(3) . 1_455 ?
O3A SiA Fe2 52.53(3) 6_556 1_455 ?
O3A SiA Fe2 52.53(3) . 1_455 ?
O2A SiA Fe2 106.87(3) 7_655 1_455 ?
Fe1 SiA Fe2 71.295(16) . 1_455 ?
Fe1 SiA Fe2 71.295(16) 2 1_455 ?
O1A SiA Mg2 82.06(3) . 7_755 ?
O3A SiA Mg2 118.63(2) 6_556 7_755 ?
O3A SiA Mg2 118.63(2) . 7_755 ?
O2A SiA Mg2 32.11(3) 7_655 7_755 ?
Fe1 SiA Mg2 74.814(11) . 7_755 ?
Fe1 SiA Mg2 74.814(11) 2 7_755 ?
Fe2 SiA Mg2 138.985(14) 1_455 7_755 ?
O2A Fe2 O3A 90.84(2) 1_655 3 ?
O2A Fe2 O3A 90.84(2) 1_655 8_666 ?
O3A Fe2 O3A 110.60(5) 3 8_666 ?
O2A Fe2 O1A 177.01(3) 1_655 . ?
O3A Fe2 O1A 90.86(2) 3 . ?
O3A Fe2 O1A 90.86(2) 8_666 . ?
O2A Fe2 O3A 96.53(3) 1_655 6_656 ?
O3A Fe2 O3A 159.41(3) 3 6_656 ?
O3A Fe2 O3A 88.56(4) 8_666 6_656 ?
O1A Fe2 O3A 81.06(3) . 6_656 ?
O2A Fe2 O3A 96.53(3) 1_655 1_655 ?
O3A Fe2 O3A 88.56(4) 3 1_655 ?
O3A Fe2 O3A 159.41(3) 8_666 1_655 ?
O1A Fe2 O3A 81.06(3) . 1_655 ?
O3A Fe2 O3A 71.54(5) 6_656 1_655 ?
O2A Fe2 SiA 99.65(3) 1_655 1_655 ?
O3A Fe2 SiA 123.96(3) 3 1_655 ?
O3A Fe2 SiA 123.96(3) 8_666 1_655 ?
O1A Fe2 SiA 77.36(3) . 1_655 ?
O3A Fe2 SiA 35.80(2) 6_656 1_655 ?
O3A Fe2 SiA 35.80(2) 1_655 1_655 ?
O2A Fe1 O2A 180.0 7_655 3_455 ?
O2A Fe1 O1A 93.48(5) 7_655 5_655 ?
O2A Fe1 O1A 86.52(5) 3_455 5_655 ?
O2A Fe1 O1A 86.52(5) 7_655 1_455 ?
O2A Fe1 O1A 93.48(5) 3_455 1_455 ?
O1A Fe1 O1A 180.00(4) 5_655 1_455 ?
O2A Fe1 O3A 74.67(3) 7_655 . ?
O2A Fe1 O3A 105.33(3) 3_455 . ?
O1A Fe1 O3A 94.90(3) 5_655 . ?
O1A Fe1 O3A 85.10(3) 1_455 . ?
O2A Fe1 O3A 105.33(3) 7_655 5 ?
O2A Fe1 O3A 74.67(3) 3_455 5 ?
O1A Fe1 O3A 85.10(3) 5_655 5 ?
O1A Fe1 O3A 94.90(3) 1_455 5 ?
O3A Fe1 O3A 180.000(17) . 5 ?
O2A Fe1 SiA 142.30(2) 7_655 5 ?
O2A Fe1 SiA 37.70(2) 3_455 5 ?
O1A Fe1 SiA 81.02(4) 5_655 5 ?
O1A Fe1 SiA 98.98(4) 1_455 5 ?
O3A Fe1 SiA 142.712(19) . 5 ?
O3A Fe1 SiA 37.288(18) 5 5 ?
O2A Fe1 SiA 37.70(2) 7_655 . ?
O2A Fe1 SiA 142.30(2) 3_455 . ?
O1A Fe1 SiA 98.98(3) 5_655 . ?
O1A Fe1 SiA 81.02(3) 1_455 . ?
O3A Fe1 SiA 37.288(19) . . ?
O3A Fe1 SiA 142.712(18) 5 . ?
SiA Fe1 SiA 180.0 5 . ?
SiA O1A Fe1 122.74(3) . 2_655 ?
SiA O1A Fe1 122.74(3) . 1_655 ?
Fe1 O1A Fe1 91.69(5) 2_655 1_655 ?
SiA O1A Fe2 118.40(4) . . ?
Fe1 O1A Fe2 97.40(3) 2_655 . ?
Fe1 O1A Fe2 97.40(3) 1_655 . ?
SiA O2A Fe2 122.54(5) 7_665 1_455 ?
SiA O2A Fe1 92.22(3) 7_665 4 ?
Fe2 O2A Fe1 124.13(3) 1_455 4 ?
SiA O2A Fe1 92.22(3) 7_665 3 ?
Fe2 O2A Fe1 124.13(3) 1_455 3 ?
Fe1 O2A Fe1 92.53(5) 4 3 ?
SiA O3A Fe2 124.52(4) . 3_455 ?
SiA O3A Fe1 90.40(3) . . ?
Fe2 O3A Fe1 116.97(3) 3_455 . ?
SiA O3A Fe2 91.67(5) . 1_455 ?
Fe2 O3A Fe2 128.97(3) 3_455 1_455 ?
Fe1 O3A Fe2 94.67(3) . 1_455 ?
 
_refine_diff_density_max    0.357
_refine_diff_density_min   -0.273
_refine_diff_density_rms    0.069

_shelx_res_file
;
TITL MY_DIAMOND_1_inc_1_DC
    shelx.res
    created by SHELXL-2018/3 at 12:16:26 on 04-May-2023
CELL   0.71073    4.7541  10.186   5.982   90.000   90.000   90.000
ZERR         4      0.001    0.002    0.004    0.000    0.000    0.000
LATT  1
SYMM -X,-Y,1/2+Z
SYMM 1/2+X,1/2-Y,-Z
SYMM 1/2-X,1/2+Y,1/2-Z
SFAC O SI
SFAC MG+2  3.4988 2.1676 3.8378 4.7542 1.3284 .185 .8497 =
   10.1411  .4853   .0420  .0360  165.  1.60  24.305
SFAC SI+4 4.43918  1.64167 3.20345  3.43757 1.19453  .2149  .416530 =
    6.65365   .746297 .0720 .0710  310.  1.17   28.0855
SFAC FE+2  11.0424  4.6538  7.374  .3053  4.1346 12.0546  .4399 =
   31.2809  1.0097  .3010 .8450  3490.  1.24   55.847
SFAC O-2    2.5371  5.7271  4.3991  17.17999  1.9535  .2189  1.2957  =
   44.606  -.205  .0080  .0060  32.5  .66  15.9994
UNIT 1 1 1 1 1 1
L.S.      10
SHEL 999 0.55
ACTA
FMAP      2
BOND 0.5
PLAN     25
OMIT 0 0 4
OMIT 1 9 1
OMIT 1 1 4
OMIT 4 0 0
SUMP 1.0 0.001 1 2 1 3
SUMP 1.0 0.001 1 4 1 5
SUMP 1.0 0.001 1 6 1 7
SUMP 1.0 0.001 1 8 1 9
SUMP 1.0 0.001 1 10 1 11
SUMP 1.0 0.001 1 12 1 13
WGHT    0.024600    0.068000
EXTI    0.027293
FVAR       1.39053   0.64195   0.35676   0.08353   0.91646   0.08898   0.91091
FVAR       0.19563   0.80516   0.26636   0.73393   0.25820   0.74210
SIA   2    0.426613    0.094286    0.250000    20.50000    0.00267    0.00416 =
         0.00513    0.00000    0.00000    0.00017
SIB   4    0.426613    0.094286    0.250000    30.50000    0.00267    0.00416 =
         0.00513    0.00000    0.00000    0.00017
FE2   5    0.990195    0.277645    0.250000    40.50000    0.00599    0.00498 =
         0.00652    0.00000    0.00000    0.00009
MG2   3    0.990195    0.277645    0.250000    50.50000    0.00599    0.00498 =
         0.00652    0.00000    0.00000    0.00009
FE1   5    0.000000    0.000000    0.000000    60.50000    0.00460    0.00733 =
         0.00558   -0.00121   -0.00056    0.00000
MG1   3    0.000000    0.000000    0.000000    70.50000    0.00460    0.00733 =
         0.00558   -0.00121   -0.00056    0.00000
O1A   1    0.766073    0.091655    0.250000    80.50000    0.00375    0.00672 =
         0.00585    0.00000    0.00000    0.00012
O1B   6    0.766073    0.091655    0.250000    90.50000    0.00375    0.00672 =
         0.00585    0.00000    0.00000    0.00012
O2A   1    0.220753    0.447594    0.250000   100.50000    0.00470    0.00479 =
         0.00677    0.00000    0.00000   -0.00003
O2B   6    0.220753    0.447594    0.250000   110.50000    0.00470    0.00479 =
         0.00677    0.00000    0.00000   -0.00003
O3A   1    0.278264    0.163220    0.033407   121.00000    0.00521    0.00692 =
         0.00634    0.00104   -0.00014    0.00031
O3B   6    0.278264    0.163220    0.033407   131.00000    0.00521    0.00692 =
         0.00634    0.00104   -0.00014    0.00031
EXYZ Fe2 Mg2
EADP Fe2 Mg2
EXYZ Fe1 Mg1
EADP Fe1 Mg1
EXYZ O1A O1B
EADP O1A O1B
EXYZ O2A O2B
EADP O2A O2B
EXYZ O3A O3B
EADP O3A O3B
EXYZ SiA SiB
EADP SiA SiB
HKLF      4


REM  MY_DIAMOND_1_inc_1_DC
REM wR2 = 0.0362, GooF = S = 1.005, Restrained GooF = 1.001 for all data
REM R1 = 0.0138 for 472 Fo > 4sig(Fo) and 0.0153 for all 503 data
REM 53 parameters refined using 6 restraints

END

WGHT      0.0213      0.0554

REM Highest difference peak  0.357,  deepest hole -0.273,  1-sigma level  0.069
Q1    1   0.3350  0.1181  0.3582  11.00000  0.05    0.36
Q2    1   0.5963  0.0832  0.2500  10.50000  0.05    0.34
Q3    1   0.5035  0.4965  0.2500  10.50000  0.05    0.29
Q4    1   0.8363  0.1606  0.2500  10.50000  0.05    0.19
Q5    1   0.4882  0.2469  0.0027  11.00000  0.05    0.19
Q6    1   0.9923  0.1201  0.2500  10.50000  0.05    0.18
Q7    1  -0.2157  0.0147 -0.0547  11.00000  0.05    0.18
Q8    1   0.8109  0.3088  0.2500  10.50000  0.05    0.16
Q9    1   0.1004  0.4897  0.2500  10.50000  0.05    0.16
Q10   1   1.2377  0.2181  0.2500  10.50000  0.05    0.16
Q11   1   0.3908  0.1863 -0.0634  11.00000  0.05    0.16
Q12   1   0.1717  0.0931  0.0031  11.00000  0.05    0.15
Q13   1  -0.2438  0.0829  0.0000  11.00000  0.05    0.15
Q14   1  -0.2589 -0.0182  0.0508  11.00000  0.05    0.14
Q15   1   0.8726  0.0679  0.3431  11.00000  0.05    0.14
Q16   1   0.2806  0.3265  0.2500  10.50000  0.05    0.14
Q17   1   0.1819  0.5226  0.2963  11.00000  0.05    0.14
Q18   1   0.7540  0.2631  0.2864  11.00000  0.05    0.14
Q19   1   0.9683  0.2629  0.3797  11.00000  0.05    0.13
Q20   1   0.5364  0.3667  0.3128  11.00000  0.05    0.13
Q21   1   0.6558  0.3403  0.2500  10.50000  0.05    0.12
Q22   1   0.4897  0.1062 -0.0580  11.00000  0.05    0.11
Q23   1   0.0117  0.1244  0.0944  11.00000  0.05    0.10
Q24   1  -0.0950  0.0026  0.0962  11.00000  0.05    0.09
Q25   1   1.1114  0.2953  0.2500  10.50000  0.05    0.09
;
_shelx_res_checksum   36477

_shelx_hkl_file
;
   0   0   1-0.13277 0.30324   1
   0   0  -1 0.91482 0.31602  24
   0   0   1 0.85838 0.57622  18
   0   0   1 0.28619 0.50217  19
   0   0  -1 0.96220 0.57925  21
   0   0  -1 0.21249 0.43560   8
   0   0  -1 0.25264 0.41571   3
   0   0   1 1.57245 0.45561   2
   0   0  -1 0.36426 0.61768  23
   0   0  -2 3679.81 84.2858   3
   0   0   2 3799.21 84.9787  19
   0   0   2 3578.97 84.6022   2
   0   0   2 3748.83 85.1292  18
   0   0  -2 3570.36 83.8439  15
   0   0  -2 3772.07 84.9738  23
   0   0  -2 3885.10 85.3099  21
   0   0  -2 3648.49 84.6755   8
   0   0  -2 3766.47 84.1241  24
   0   0  -3 0.72151 1.04130  25
   0   0   3 4.49375 2.38333  18
   0   0  -3-1.73227 2.55698  21
   0   0  -3 2.14935 0.79574  15
   0   0   3 1.40415 1.95619  19
   0   0  -3-1.11155 2.53965  23
   0   0   3-0.70558 1.74623   2
   0   0  -3 2.97873 1.90466   3
   0   0  -3-1.44738 1.75878   8
   0   0  -4 25369.4 581.624  21
   0   0   4 25721.5 580.275   2
   0   0  -4 25721.6 580.534   8
   0   0   4 24986.6 581.585  18
   0   0  -5 0.23575 5.45379  21
   0   0   5-0.47322 3.83035   2
   0   0   5-1.50474 4.31249  19
   0   0   5 1.22378 5.01625  18
   0   0  -5-1.96669 3.68401   8
   0   0  -6 2164.37 51.6662   8
   0   0  -6 2163.67 53.4014  21
   0   0   6 2114.57 52.8858  19
   0   0   7 0.66946 7.20414  19
   0   0  -7-17.4184 9.17941  21
   0   0  -7-1.99614 6.82828   8
   0   0  -8 4941.50 121.366  21
   0   0   8 5025.46 121.642  19
   0   1   0 0.63839 0.28408  16
   0  -1  -1 0.86839 0.74701  21
   0   1   1 0.03480 0.77060   6
   0   1  -1-0.19489 0.60813  21
   0  -1  -1-1.00383 0.88179  23
   0   1  -1 0.02103 0.39028  12
   0  -1   1-0.54123 0.62686   4
   0   1   1 1.42592 0.66572  19
   0   1  -2-0.40926 1.20701   3
   0  -1  -2 0.18241 1.03861   8
   0   1   2 1.03486 0.83412  11
   0  -1  -2 1.43969 1.50654  21
   0   1   2-1.23038 1.44877  18
   0  -1  -2 3.71032 1.77989  23
   0   1   2 0.48338 1.33296   6
   0  -1   2 0.51773 1.40338  18
   0  -1  -2 1.13372 0.67124  25
   0  -1   2-0.29716 1.09451   4
   0   1   2 0.70745 0.67312   1
   0   1   2-0.58827 1.01884  20
   0   1   2-0.31927 1.21115  19
   0   1  -2-0.08303 1.39887  21
   0   1  -3-0.74234 1.13071  24
   0   1  -3-0.38987 2.49362  21
   0   1   3 0.86698 2.16273  19
   0   1   3-1.53721 2.33776  18
   0  -1  -3 0.96338 2.53467  21
   0   1   3-0.94862 1.77850   2
   0  -1   3 1.34108 2.23474  18
   0  -1   3 0.72371 1.91883   2
   0   1  -3-1.23240 1.87668   8
   0   1  -3 1.56139 2.00421   3
   0  -1  -3-0.04641 1.03148  25
   0   1   3 0.16318 1.11597   1
   0  -1  -3-0.27574 1.79909   8
   0  -1   4 1.83025 2.92439   2
   0  -1  -4-2.89211 2.77690   8
   0  -1   4 1.12165 3.60841  18
   0   1  -4 2.03753 2.92033   8
   0  -1   4-2.63875 3.18452  19
   0  -1  -4 1.68734 4.05744  21
   0   1  -4 2.13901 3.68364  21
   0   1  -4 2.01426 2.98885   3
   0   1   4 1.46331 3.43356  18
   0  -1  -4-0.67658 4.07957  23
   0   1   4-2.22227 2.63296   2
   0   1   4-2.41896 3.17391  19
   0  -1   5 1.84136 4.30568  19
   0   1  -5 0.23027 5.44806  21
   0  -1   5 1.22206 4.10442   2
   0  -1  -5-0.64919 3.76067   8
   0  -1  -5 4.30818 5.11626  21
   0   1  -5-0.53420 3.68365   8
   0  -1   6 1.27557 5.23866   2
   0  -1  -6 5.30997 6.85222  21
   0   1  -6 0.57204 6.43486  21
   0  -1   6-4.43184 5.87526  19
   0  -1  -6 4.62511 4.96595   8
   0   1  -6-2.55468 5.10745   8
   0   1  -7-5.50379 8.47022  21
   0   1   7-0.34797 7.60788  19
   0   1  -7 7.44932 6.51928   8
   0  -1  -7-6.00938 8.91000  21
   0  -1   7-2.95535 7.39406  19
   0  -1  -8-5.77658 11.3098  21
   0   1   8 4.16638 9.99559  19
   0   1  -8-3.61502 8.16024   8
   0   1  -8 0.40043 10.2660  21
   0  -2   0 1673.36 38.7066   5
   0   2   0 1728.69 39.1978  17
   0   2   0 1713.11 39.2505  16
   0  -2  -1 4207.66 93.9639  23
   0   2  -1 4121.83 93.6446  16
   0  -2   1 3999.26 93.7503   4
   0   2  -1 4109.88 93.3202  21
   0  -2   1 4064.92 93.6548   9
   0   2   1 4026.64 93.3589   6
   0   2   1 4112.39 93.8031  19
   0   2   2 255.852 6.90232  20
   0   2  -2 264.374 7.27213   3
   0   2   2 221.436 6.87529  11
   0   2  -2 264.671 7.37255  21
   0  -2  -2 262.628 8.04894  23
   0   2   2 259.781 7.55939  19
   0  -2   2 244.342 7.40325   4
   0   2  -2 248.890 6.62821  12
   0   2   2 249.444 6.44466   1
   0   2   2 251.941 7.13013   6
   0  -2  -3 89.0926 5.08765  23
   0   2   3 83.2069 3.79468  20
   0  -2   3 86.5149 4.14175   2
   0   2  -3 86.7393 4.15705   3
   0   2   3 81.6651 3.06367   1
   0   2   3 87.6306 4.13880   6
   0   2  -3 85.0372 4.42672  21
   0  -2  -3 93.3871 4.73980  21
   0   2   3 82.5409 3.57890  11
   0  -2   3 83.7777 4.14861  19
   0   2   3 92.5248 4.53407  19
   0   2  -3 81.0566 3.60092  12
   0  -2   4 850.880 22.7886   2
   0  -2  -4 898.737 23.5675  23
   0   2   4 873.476 21.0009   1
   0   2   4 831.186 21.8611  20
   0   2  -4 819.211 22.3517   8
   0  -2   4 874.013 22.7258  19
   0  -2  -4 928.558 23.5852  21
   0   2   4 881.535 23.1536  19
   0   2  -4 864.207 21.9828   3
   0   2  -4 928.850 23.2024  21
   0   2   5 2060.53 54.0806  18
   0  -2  -5 2253.16 54.3528  21
   0  -2   5 2197.03 53.4268  19
   0  -2  -5 2149.22 54.0463  23
   0   2   5 2222.87 54.1808  19
   0   2  -5 2168.96 53.9269  21
   0   2  -5 2071.63 52.7850   8
   0  -2   5 2248.48 53.4424   2
   0   2   6 596.138 19.7204  19
   0  -2  -6 573.297 19.8202  21
   0  -2   6 592.570 18.5838   2
   0   2  -6 584.878 19.7378  21
   0   2   6 606.708 20.0649  18
   0   2  -6 612.725 18.4127   8
   0   2  -7 10.5443 8.54047  21
   0   2   7 27.6115 9.69837  18
   0  -2  -7 14.6911 8.52605  21
   0   2  -7 17.4985 7.24343   8
   0  -2  -8 382.120 17.8324  21
   0   2  -8 389.360 18.2590  21
   0   2   8 391.652 18.2625  19
   0   2  -8 388.347 16.1093   8
   0   3   0-0.05877 1.00082  17
   0  -3   0-0.34734 0.92795  23
   0   3   0 0.97036 0.99644  16
   0  -3   1-1.27969 1.37203  14
   0  -3  -1 0.71113 1.08670  21
   0  -3   1 0.78780 1.21599   4
   0   3   1-0.29432 1.28495  19
   0  -3  -1-1.58257 1.59261  23
   0   3  -1 0.69062 1.12518  16
   0  -3  -2-0.39530 2.06321  21
   0   3   2 0.42175 1.72964   6
   0  -3   2 1.02214 1.64016   4
   0   3  -2-0.07576 1.47272  21
   0   3  -2 1.65004 0.87692  22
   0   3  -2-0.77194 1.84716   3
   0   3   2 0.23998 1.63093  11
   0   3  -2 1.43838 1.65049  16
   0   3   2 0.10845 1.97911  19
   0  -3  -2-0.89475 2.38142  23
   0   3   3-0.10006 1.94731  11
   0   3   3 2.51064 2.13700  20
   0  -3   3-1.69788 2.50963   4
   0   3   3-0.26958 2.89515  18
   0   3   3-1.79941 2.58367   6
   0  -3   3 3.11976 2.57155   2
   0   3  -3-1.38443 2.75942   3
   0  -3  -3 0.68734 3.45855  23
   0   3   3 4.50786 2.74474  19
   0   3  -3 1.82133 2.73653  21
   0   3   3 1.43449 1.40869   1
   0   3   4 1.89001 1.84896   1
   0  -3   4 0.51774 3.72486   2
   0   3  -4-0.67491 3.43328   3
   0   3   4 2.19516 2.78685  20
   0  -3  -4 0.20897 4.83060  23
   0   3  -4-4.77105 4.12873  21
   0   3   4-1.28022 4.05747  18
   0   3   4-0.19181 3.47778  19
   0   3  -5-5.55726 5.61457  21
   0   3   5-0.82840 2.52738   1
   0   3  -5-1.58520 4.40341   8
   0  -3   5 6.23937 4.75991   2
   0   3   5-0.49689 4.89080  19
   0  -3  -5 4.78388 6.60865  23
   0   3   5 3.85337 5.41826  18
   0   3  -5 2.74110 4.41145   3
   0   3   6 1.24131 7.34205  18
   0  -3  -6 3.96158 7.11866  21
   0   3  -6 4.22768 5.38854   8
   0   3  -6-3.33588 6.94851  21
   0  -3   6-2.62225 5.99094   2
   0   3   6-0.62408 6.36168  19
   0  -3   7 0.29765 7.17372   2
   0  -3  -7 2.54455 8.84655  21
   0   3   7 1.90451 9.44021  18
   0   3  -7-0.55490 6.89594   8
   0   3   7 5.27817 7.97345  19
   0   3  -8-1.89460 8.13870   8
   0  -3  -8 6.34145 11.1529  21
   0  -4   0 21.1842 1.88189  23
   0   4   0 21.4891 2.01430  16
   0   4   0 23.5696 2.01466  17
   0   4   0 21.2009 1.80597  13
   0  -4  -1 2813.70 63.4395  21
   0   4  -1 2671.88 64.0645  16
   0  -4   1 2657.03 64.0559   9
   0  -4   1 2841.42 62.9360  23
   0  -4   1 2649.07 64.1825  14
   0   4   1 2649.21 64.0023  19
   0   4   2 825.271 20.8608  11
   0   4  -2 827.571 20.9221  16
   0   4   2 848.553 21.3618  19
   0  -4  -2 814.410 21.8043  23
   0  -4  -2 868.068 21.1026  21
   0  -4   2 814.624 21.1987   4
   0   4   2 824.334 20.3545   6
   0  -4  -3 5302.20 124.258  21
   0   4  -3 5459.18 123.934   3
   0   4  -3 5359.91 123.587  21
   0  -4  -3 5301.71 125.056  23
   0   4   3 5467.55 123.599  11
   0  -4   3 5449.27 124.539   4
   0   4   3 5249.23 122.472   1
   0   4   3 5239.93 123.302   6
   0   4   3 5332.34 124.337  19
   0   4  -3 5410.08 123.614  16
   0   4  -4 314.050 10.7752   3
   0  -4  -4 336.287 11.8297  21
   0   4   4 321.764 9.09434   1
   0  -4   4 330.968 11.2660   2
   0   4   4 339.766 10.3675  11
   0   4   4 343.909 10.3144  20
   0   4   4 328.082 11.4487  18
   0  -4  -4 319.752 12.1839  23
   0   4   4 307.178 11.3752  19
   0   4  -4 331.304 10.4650  16
   0  -4  -5 471.457 16.6066  23
   0   4   5 415.075 15.7101  19
   0   4   5 529.929 16.4065  18
   0  -4  -5 489.970 16.4359  21
   0   4  -5 470.555 14.7939   3
   0  -4   5 489.742 15.9522   2
   0   4   5 485.081 14.3882  20
   0   4   6 764.136 23.8205  19
   0  -4   6 761.858 23.2386   2
   0   4   6 796.818 24.3066  18
   0  -4  -6 716.937 23.7646  21
   0   4  -6 774.417 22.6811   8
   0  -4  -6 748.637 24.2330  23
   0   4   7 1893.26 50.5129  19
   0   4   7 1857.14 50.3889  18
   0   4  -7 1873.54 48.3437   8
   0  -4  -7 1739.43 49.9220  12
   0  -4   7 1928.24 49.4145   2
   0   4  -8 148.762 11.8991   8
   0   4   8 148.856 14.1110  19
   0  -5   0 2.17713 2.17063  23
   0   5   0 0.16277 1.79248  13
   0   5   0 0.55243 1.99761  16
   0  -5   0 0.21532 0.80362  21
   0  -5  -1-0.58776 1.66543  21
   0   5  -1 3.29887 2.19837  16
   0   5   1 1.48695 2.30724  19
   0  -5   1 1.97459 2.10574   9
   0  -5  -1 0.86616 2.75959  23
   0  -5   1-1.00714 2.50347  14
   0  -5   1 0.74598 1.59063  23
   0  -5   1 0.10570 1.94167   4
   0  -5   2 1.32230 2.82384  14
   0   5   2 7.37126 2.55110  11
   0   5   2 0.97176 2.77584  19
   0  -5   2-0.81485 1.01426  23
   0   5  -2-1.88922 2.60278  16
   0  -5  -2 0.11012 2.57241  21
   0   5   3 0.95135 3.08405  11
   0  -5   3-0.85843 3.36823   4
   0   5   3-2.12661 3.57072  19
   0   5  -3-3.55716 3.57190   3
   0  -5  -3 5.36776 4.85142  23
   0   5  -3 0.56226 2.96109  16
   0  -5  -3-0.94301 3.58773  21
   0   5  -4 3.88146 4.01122  16
   0  -5   4-3.82561 4.07342   4
   0  -5  -4 6.05811 5.04616  21
   0   5   4 0.98526 3.30926  20
   0   5  -4 1.76000 4.99342   3
   0  -5  -4 3.82293 5.48981  23
   0  -5   4 2.53646 4.17052   2
   0   5   4-0.31535 3.50095  11
   0   5   4 1.27795 4.41526  19
   0   5   4-0.58340 4.67627  18
   0   5   4 2.58554 2.21132   1
   0   5   5-3.71916 6.07890  18
   0   5   5 1.90453 5.61125  19
   0  -5  -5 9.66123 6.54523  21
   0  -5   5 4.60932 5.55249   2
   0   5   5 1.01282 4.20480  20
   0   5  -5 3.10960 5.75567   3
   0  -5  -5 11.5770 7.74178  23
   0   5   5-0.52664 4.15359  11
   0  -5   6-3.05657 7.35538   2
   0   5   6-5.95442 7.89920  18
   0  -5  -6-0.34247 8.91988  23
   0   5  -6 4.53796 6.49155   8
   0  -5  -6 7.60771 8.36773  21
   0   5   6 2.69084 7.58691  19
   0  -5  -7-5.62583 9.82537  21
   0   5  -7 4.26403 7.81378   8
   0   5   7-1.94402 10.6447  18
   0   5   7-0.40637 9.11860  19
   0  -5   7 6.09255 9.08317   2
   0   5   8-12.6356 10.9861  18
   0  -6   0 33.3472 1.40942  21
   0   6   0 39.9090 3.13398  13
   0  -6  -1 7080.38 158.897  23
   0  -6  -1 6923.83 157.287  21
   0  -6   1 6661.82 158.355   4
   0  -6   1 6947.67 158.713   9
   0  -6   1 6662.18 157.411  23
   0   6  -1 6910.08 158.670  16
   0   6   1 6971.59 158.473  19
   0  -6   1 6826.84 159.008  14
   0   6   1 7018.70 157.761  13
   0  -6   2 22733.8 513.835  23
   0  -6  -2 21722.6 517.096  23
   0  -6   2 22512.2 516.279   4
   0  -6   2 23195.1 516.273   9
   0   6   2 22525.8 516.356  19
   0  -6  -2 22363.4 515.476  21
   0   6  -2 22386.9 516.276  16
   0   6  -2 22338.7 516.291   3
   0   6   2 23287.1 516.018  11
   0  -6   2 22931.1 516.383  14
   0  -6  -3 4174.46 98.7808  23
   0   6  -3 4062.24 97.4232   3
   0   6   3 4110.30 97.8160  19
   0   6   3 4196.86 97.0936  11
   0  -6  -3 4192.09 97.2995  21
   0   6  -3 4115.54 97.1436  16
   0   6   4 272.818 11.5732  19
   0  -6   4 315.382 11.7422   4
   0   6   4 313.809 11.5040  18
   0   6   4 263.180 10.4173  11
   0   6  -4 289.051 10.8420   3
   0   6   4 295.586 10.1354  20
   0  -6  -4 311.674 12.8285  23
   0   6  -4 305.271 10.8197  16
   0   6   4 298.570 8.81810   1
   0  -6  -4 320.407 11.7232  21
   0  -6   5 2746.59 66.0999   2
   0   6  -5 2711.55 64.8215   3
   0  -6  -5 2579.99 65.8558  21
   0  -6  -5 2624.73 66.9076  23
   0   6   5 2533.22 66.0186  19
   0   6   5 2667.86 65.6335  18
   0   6   5 2710.25 64.4538  11
   0  -6  -6 5583.01 130.228  21
   0   6  -6 5463.40 128.192   3
   0   6   6 5822.49 130.891  19
   0  -6  -6 5566.24 131.081  23
   0   6   6 5807.46 130.212  18
   0   6  -7 1008.86 31.4235   8
   0  -6  -7 1013.64 32.4402  21
   0  -6   7 1177.86 33.2852   2
   0   6   7 1142.96 33.6129  18
   0   6   7 1101.43 33.7435  19
   0   6   8 434.168 20.1305  18
   0  -7   0-0.50813 3.70316  23
   0   7   0-1.97281 2.91918  13
   0   7   0-1.82667 3.09767  17
   0  -7   1-0.81570 3.07387   9
   0  -7   1 0.72477 4.19851  14
   0   7   1-0.14237 3.47759  19
   0  -7   1 0.88760 2.90626  23
   0   7  -1 15.3225 3.50104  17
   0  -7   1 0.84572 3.30333   4
   0   7  -1-1.49245 3.37725  16
   0  -7  -1-1.53586 2.31566  21
   0  -7  -1-0.17223 4.19761  23
   0   7   1-0.32140 2.99950  13
   0  -7   2 5.48683 4.27242  14
   0   7   2-3.43230 4.25022  19
   0   7   2-1.27245 3.60316  11
   0  -7  -2 1.30789 3.23226  21
   0  -7   2-2.46996 3.34466   9
   0   7  -2 0.34396 3.81847  16
   0  -7  -2 3.33938 5.19635  23
   0  -7   2 3.42307 3.71100   4
   0   7  -3-3.22946 4.73199  16
   0  -7   3-12.4075 4.97607   4
   0  -7  -3 1.68538 4.79239  21
   0   7   3 0.42370 4.80769  19
   0   7   3 1.96436 4.11452  11
   0   7  -4-1.31906 6.06460   3
   0   7   4 10.2147 5.73501  19
   0  -7  -4-1.96506 5.84311  21
   0  -7  -4 4.50064 7.70270  23
   0   7  -4-0.81838 5.07430  16
   0   7   4-0.79243 4.77094  11
   0   7   5-3.90991 5.23542  11
   0  -7  -5 7.06401 7.50376  21
   0   7  -5-0.23837 6.92720   3
   0   7   5 2.84497 6.80170  18
   0  -7  -5 2.42371 8.88896  23
   0   7   5 4.62783 5.09371  20
   0   7   5 5.96998 6.56847  19
   0  -7   5 7.12786 6.54721   2
   0  -7  -6 3.60801 8.65302  21
   0  -7   6 0.36375 7.98960   2
   0   7  -6 4.87461 8.24746   3
   0   7   6 0.36473 8.01837  19
   0   7   6-8.91379 9.06640  18
   0  -7  -6-12.9568 10.8686  23
   0  -7  -7 3.85186 10.1682  21
   0   7  -7 6.04286 8.24275   8
   0  -7   7 3.24012 9.36180   2
   0   7   7 0.77687 10.6907  18
   0   7   7-1.28162 9.30616  19
   0  -8   0 311.930 10.6585  23
   0   8   0 311.736 10.4154  17
   0   8   0 302.951 9.95590  13
   0  -8   0 308.414 9.88567   4
   0   8   1 408.633 12.9687  19
   0  -8   1 423.077 13.9419  14
   0  -8   1 423.876 13.2603   9
   0  -8  -1 446.031 14.1232  23
   0   8   1 403.548 12.1424  13
   0   8  -1 424.927 13.3936   3
   0  -8   1 379.995 12.5310   4
   0   8  -1 397.017 13.1002  17
   0   8  -1 434.559 13.4284  16
   0  -8   1 441.943 12.2549  23
   0  -8  -2 995.478 24.3215  21
   0   8  -2 900.874 25.6330   3
   0   8   2 917.072 25.6610  19
   0  -8  -2 1010.56 27.0177  23
   0  -8   2 955.908 25.5929   4
   0   8   2 946.205 25.4334  11
   0  -8   2 964.794 26.0439  14
   0   8   2 1006.16 23.8645   3
   0  -8   2 868.637 25.4025   9
   0   8  -2 941.376 25.7880  16
   0  -8  -3 1297.01 32.9387  21
   0   8  -3 1294.46 33.8809   3
   0   8  -3 1225.47 33.4402  16
   0  -8  -3 1292.51 35.2027  23
   0   8   3 1336.14 34.1525  19
   0  -8   3 1281.62 33.6573   4
   0   8   3 1284.16 33.3387  11
   0  -8  -4 277.294 11.6652  21
   0   8   4 260.955 10.8954  11
   0  -8   4 256.668 11.6658   4
   0   8   4 267.252 12.1148  19
   0   8  -4 269.796 11.2795  16
   0   8  -4 275.235 11.8123   3
   0   8   5 11.2832 7.68899  19
   0   8   5 13.0081 7.36807  18
   0   8   5 21.4626 6.39064  11
   0  -8   5 21.1826 7.29818   2
   0  -8  -5 24.9569 10.2834  23
   0  -8  -5 17.1908 7.98332  21
   0   8  -5 17.2619 7.57944   3
   0   8   6 455.582 19.7126  19
   0  -8   6 533.937 20.1468   2
   0  -8  -6 530.827 20.4358  21
   0   8  -6 477.182 18.3902   3
   0  -8  -6 473.085 21.9454  23
   0  -8  -7 869.790 27.9028  21
   0   8  -7 795.873 26.1596   8
   0  -8   7 796.756 27.6404   2
   0   8   7 804.857 27.6814  19
   0  -9   0 3.22693 4.25305   9
   0   9   0 1.05876 4.04051  13
   0   9   0-0.75932 4.26363  17
   0  -9   0 0.45405 4.14638   4
   0  -9   0 5.77051 5.37243  23
   0   9   0 5.54482 4.81868   3
   0  -9  -1-0.22138 6.26368  23
   0   9  -1 0.44013 4.70866  16
   0   9  -1-2.92930 4.54862  13
   0   9   1 5.71406 4.46344   3
   0  -9   1 2.68560 4.51593   4
   0   9  -1-3.54688 5.01799   3
   0  -9   1-0.72165 5.73124  14
   0   9  -2 5.49651 5.16164  16
   0   9  -2-2.91254 5.19155  17
   0   9  -2-0.21942 5.64055   3
   0  -9   2 2.49472 5.07836   4
   0  -9   2 8.37226 5.02425   9
   0  -9   2 0.93864 5.36142  14
   0  -9  -2-0.53488 7.47509  23
   0   9   2 1.87062 5.11446  11
   0  -9   3-3.49008 5.98074   4
   0   9   3-1.12699 5.54207  11
   0   9   3 1.23366 6.18886  19
   0  -9  -3-0.61647 7.74234  23
   0   9  -3 5.19640 5.88315  16
   0   9   4-5.38670 6.84832  19
   0   9  -4 4.78313 6.31460  16
   0  -9  -4 1.40946 9.60743  23
   0   9  -4 0.26567 7.29915   3
   0  -9   4-3.83064 6.91107   4
   0   9   4-2.67255 5.94781  11
   0   9  -5-7.41646 9.08848   3
   0   9   5-5.58902 7.90065  19
   0  -9  -5-7.54885 8.23083  21
   0   9   5-4.76486 6.37644  11
   0  -9   6-2.42227 9.58883   2
   0  -9  -6-1.00528 9.97297  21
   0   9   6 0.78622 9.60236  19
   0  -9  -6 3.56922 12.8021  23
   0   9  -6-0.60539 8.54083   3
   0  -9  -7 243.691 21.4700  21
   0 -10   0 2149.70 52.3860   9
   0  10   0 2119.75 52.1639  17
   0 -10   0 2078.96 53.4237  14
   0  10   0 2086.46 51.8213   3
   0  10   0 2011.07 51.2248  13
   0 -10   0 2042.16 51.0380   4
   0 -10   0 2232.60 51.9045  23
   0  10   1 2119.00 53.0770   3
   0 -10   1 2159.87 53.6638   4
   0  10  -1 2283.63 54.3072   3
   0  10  -1 2191.25 53.5838  13
   0 -10  -1 2161.18 52.5884   4
   0 -10  -1 2282.88 54.8172  23
   0 -10   1 2127.14 55.1671  14
   0 -10   2 365.997 13.2864   4
   0  10  -2 375.307 13.6284  17
   0 -10   2 328.236 13.7147  14
   0  10  -2 382.423 13.8797   3
   0 -10  -2 363.352 15.0318  23
   0  10   2 362.503 13.4254  11
   0 -10   2 344.989 13.3479   9
   0  10  -2 350.241 13.6230  16
   0  10   3 813.194 24.0296  11
   0 -10   3 861.980 24.5372   4
   0 -10  -3 817.392 25.9919  23
   0  10  -3 780.821 24.0381  16
   0  10   4 1693.59 42.9978  11
   0 -10  -4 1622.65 45.5381  23
   0 -10   4 1672.53 44.0345   4
   0  10  -4 1607.95 43.4534   3
   0  10  -4 1613.25 42.9986  16
   0  10  -5 1740.81 45.8871   3
   0  10   5 1691.82 46.1039  19
   0  10   5 1695.92 45.1014  11
   0 -10  -5 1744.63 48.3448  23
   0  10   6 63.4825 10.3303  19
   0  10  -6 58.6462 11.4207   3
   0 -10   6 53.7475 12.2293   2
   0  11   0-0.19008 5.73247  13
   0 -11   0 9.82835 7.86318  14
   0  11   0-3.34202 6.27498  11
   0 -11   0 1.12275 5.26245   4
   0  11   0-6.68393 6.48937  17
   0  11   0-0.41912 6.49152   3
   0 -11   0-5.22798 5.88095   9
   0 -11   1 2.15827 5.92282   4
   0  11  -1 1.05056 5.80286  13
   0 -11   1-7.32637 7.98173  14
   0 -11  -1-0.51767 8.20298  23
   0  11  -1-0.71624 6.75871   3
   0  11  -1-4.01967 6.38911  17
   0  11  -2-3.70997 7.62022   3
   0 -11   2-5.90266 6.75717   4
   0 -11   2 1.17266 7.73403  14
   0  11  -2-5.52161 7.11116  17
   0  11   2-4.71860 6.56172  11
   0  11  -2 0.46973 6.31612  13
   0 -11  -2 7.38177 8.99826  23
   0 -11   2 3.63989 6.07093   9
   0  11  -3 13.6337 7.76533  17
   0 -11   3-0.86142 7.50875   4
   0  11  -3 1.79453 7.77574  16
   0  11  -3 6.66814 8.34650   3
   0 -11  -3 3.55653 10.4055  23
   0  11   3 6.97121 7.58588  11
   0 -11  -4-12.9520 11.0877  23
   0 -11   4 5.34933 8.16664   4
   0  11  -4-1.52930 8.42767  16
   0  11   4 0.29435 7.53637  11
   0 -11  -5 5.43170 11.5035  23
   0  11   5 4.75835 8.35293  11
   0 -11   5-3.72668 10.9720   2
   0  11  -5 1.32445 11.0875   3
   0  12   0 2244.46 56.4089  17
   0  12   0 2221.81 56.4290  11
   0 -12   0 2252.14 56.5489   9
   0  12   0 2201.80 55.4079   3
   0  12   0 2201.57 54.8741  13
   0 -12   0 2220.13 57.8729  14
   0 -12   1 2492.40 61.7210   4
   0 -12   1 2541.22 64.0965  14
   0 -12  -1 2518.01 62.7272   9
   0  12  -1 2543.11 62.3581   3
   0  12  -1 2544.59 61.7323  13
   0 -12   1 2354.10 62.7419   9
   0  12  -1 2527.46 62.6913  17
   0 -12   2 799.331 24.9354  14
   0 -12  -2 837.731 25.7056  23
   0  12  -2 790.980 24.3311   3
   0  12  -2 814.970 23.3787  13
   0 -12   2 764.613 23.4014   4
   0 -12  -3 2371.72 61.4663  23
   0  12  -3 2278.26 59.8404  16
   0  12   3 2363.90 59.6709  11
   0  12  -3 2383.99 60.0007   3
   0 -12   3 2252.80 59.5715   4
   0  12  -3 2306.81 58.9502  13
   0  12  -3 2448.97 60.2480  17
   0 -12  -4 1115.85 35.7578  23
   0 -12   4 1167.75 33.8817   4
   0  12   4 1192.53 33.4108  11
   0  12  -4 1164.46 34.6711  16
   0  12  -4 1138.34 34.3444  17
   0  12   5 1085.56 32.0030  11
   0 -13   0 6.16093 8.30213   9
   0  13   0-2.11605 7.16891  13
   0 -13   0 2.72832 10.5387  14
   0  13   0-6.05271 8.51993  11
   0  13  -1 11.4023 9.32714   3
   0 -13  -1 5.69523 10.0316  14
   0 -13   1 0.33009 7.71107   9
   0 -13   1 1.47219 10.1237  14
   0 -13  -1-5.65296 8.33210   9
   0  13  -1 4.45644 9.03112  11
   0  13   1 5.46934 8.44459  11
   0  13  -1 5.31703 8.81533  17
   0  13  -1-2.74636 7.32680  13
   0  13  -2 2.77464 9.85584   3
   0 -13   2 10.4214 7.96287   4
   0  13  -2 2.18182 8.05248  13
   0  13   2-4.20753 8.88729  11
   0 -13  -3-8.84413 12.3558  23
   0  13  -3 2.08426 8.79843  17
   0  13  -3 9.64257 8.79777  13
   0 -13   3 4.03831 9.71834   4
   0  13  -3 0.99981 9.57861   3
   0  13   3 6.37538 8.72854  11
   0  13   4-0.34775 9.89320  11
   0 -13  -4-3.62114 12.8352  23
   0 -13   4-6.58970 9.87529   4
   0 -14   0 235.322 12.7544   9
   0  14   0 219.350 13.1858  11
   0 -14   0 224.480 15.0982  14
   0  14  -1 714.647 23.4798  17
   0 -14  -1 694.963 23.3432   9
   0  14   1 679.149 23.5531  11
   0 -14  -1 711.899 25.7136  14
   0 -14   1 675.259 22.8904   9
   0  14  -1 661.142 21.5941  13
   0  14  -1 656.465 23.2667  11
   0 -14  -2 120.321 10.9568   9
   0  14   2 115.503 10.8119  11
   0  14  -2 125.868 12.5424   3
   0  14  -2 138.602 10.5407  13
   0  14  -2 124.193 11.5185  17
   0 -15  -1-5.68321 13.5903  14
   1   0   0-0.16039 0.50509  14
  -1   0   0 0.95955 0.49901  15
  -1   0   0 0.45462 0.45690  20
   1   0   0 1.15984 0.90845  22
  -1   0  -1 1651.98 35.9687  17
  -1   0   1 1487.75 36.2784  10
   1   0   1 1558.97 36.5257   1
   1   0   1 1548.27 36.5142   7
  -1   0   1 1545.71 36.7007  20
  -1   0  -1 1569.81 36.4411  15
  -1   0  -1 1541.95 36.4992  25
   1   0  -2-0.14842 1.18683   8
  -1   0   2-0.89603 1.13689   4
  -1   0   2 0.83188 0.72379  10
   1   0   2 2.32266 1.57257   2
  -1   0  -2-0.05987 1.01194  24
   1   0   2 1.59394 1.47723  19
  -1   0  -2 4.71598 1.05935  25
  -1   0   2 0.69106 1.55966  19
   1   0  -2 0.88707 1.80343  12
  -1   0   2 1.88638 1.35378  20
  -1   0  -2-0.45153 0.98553  15
   1   0   2 0.12598 1.00913   1
  -1   0  -3 141.840 4.92175   8
   1   0   3 122.788 5.11560  19
  -1   0  -3 139.120 5.38322  23
  -1   0  -3 135.974 4.34345  15
  -1   0  -3 140.648 4.80002  24
   1   0  -3 136.900 5.21729   8
  -1   0   3 140.650 4.46605   2
  -1   0  -3 137.629 4.63389  25
   1   0  -3 139.097 5.97970  12
  -1   0   3 138.438 3.82136  10
   1   0   3 125.415 4.69841   1
  -1   0   3 139.728 5.71793  19
  -1   0   3 139.401 5.93226  18
  -1   0   3 181.073 6.41270   6
  -1   0   3 142.986 5.16556   4
   1   0   3 121.043 5.49537   2
  -1   0   4-0.33809 3.71686   6
  -1   0  -4 8.80853 3.98800  21
  -1   0  -4 3.57660 3.63642  23
  -1   0  -4-0.29724 2.48610  24
  -1   0  -4 1.92991 2.23323  25
   1   0   4 1.40166 3.12846  19
  -1   0   4 0.54681 3.48133  19
   1   0  -4 0.18536 4.03452  12
  -1   0   4 0.18444 2.37467   2
  -1   0   4 1.13040 3.73032  18
   1   0  -4-0.60431 3.88420  21
   1   0   4-1.08665 2.29232   1
   1   0   4-0.82539 3.49527   2
   1   0  -4 0.56703 2.81339   8
  -1   0  -5 1303.91 33.5392   8
  -1   0   5 1254.18 32.9185   2
   1   0   5 1355.17 34.7912   2
  -1   0   5 1349.05 35.2129  19
  -1   0   5 1371.39 35.5048  18
  -1   0  -5 1378.24 35.1826  21
   1   0  -5 1361.99 34.2761   8
   1   0   5 1366.58 34.6994  19
  -1   0   5 1349.61 34.8754   6
   1   0  -5 1366.58 35.2464  12
   1   0  -5 1421.00 35.8732  21
   1   0   6-0.26111 5.66155  19
  -1   0   6-4.76754 6.11341  19
  -1   0   6-4.14441 7.41129  18
  -1   0  -6 5.37806 6.94473  21
   1   0  -6-4.23769 4.95228   8
  -1   0   7 47.7708 10.4881  18
   1   0   7 63.8788 8.39622  19
   1   0  -7 67.7618 8.46781   8
  -1   0  -7 71.4563 9.57765  21
  -1   0  -8-3.53833 9.56845  21
   1   0   8-5.75158 8.34555  19
   1  -1   0 57.2039 1.87281   7
   1  -1   0 56.6292 2.28175  14
   1   1   0 49.9883 1.53795   8
   1  -1   0 51.8024 1.92453   2
   1  -1   0 56.8970 1.73037   1
  -1   1   0 57.7166 1.96413  11
  -1  -1   0 60.3275 2.03621  10
   1  -1   1 923.150 21.4234   5
  -1  -1  -1 903.364 21.3613  24
   1  -1   1 878.199 21.6766   2
   1   1  -1 900.864 21.9764  22
   1  -1   1 884.482 20.9713  19
  -1  -1   1 875.812 20.7009  24
   1  -1   1 851.084 21.2492   1
  -1   1  -1 912.598 20.8649  11
  -1   1  -1 844.745 21.1785  25
  -1  -1  -1 901.500 21.2031  10
   1   1   1 874.390 21.3472   1
  -1   1  -1 957.841 21.1341  17
   1  -1  -1 929.669 22.1702  12
  -1  -1   1 878.515 21.0753   9
  -1   1   1 889.879 21.5033  11
  -1   1   1 986.267 21.6063  19
   1   1   1 923.492 20.7273  16
   1  -1   1 899.618 21.3606   7
   1   1   2 8687.92 196.106  11
   1  -1  -2 8469.36 198.081  12
   1  -1   2 8839.68 197.782   2
  -1   1   2 8355.73 196.653   4
  -1  -1  -2 8567.90 196.947  25
  -1  -1  -2 8215.49 197.300  23
  -1   1   2 8645.56 196.062   2
   1  -1   2 8809.80 197.011   1
  -1  -1  -2 8726.95 196.625   8
  -1  -1  -2 8670.11 196.597  10
   1   1  -2 8942.46 197.317   8
  -1  -1   2 8799.85 197.420   4
  -1  -1  -2 8750.41 197.089  24
  -1   1   2 8536.95 197.631  19
  -1  -1   2 8378.77 197.630   6
   1  -1   2 8889.16 196.977  19
  -1   1  -2 8805.73 196.949  25
  -1  -1   2 8290.14 196.658  10
  -1   1  -2 8695.82 196.313  16
  -1   1   2 8487.45 197.443  20
   1   1  -3 1044.10 22.3007   8
  -1   1  -3 880.578 20.6594  15
  -1   1   3 891.114 19.7204  10
   1  -1   3 814.983 21.3218  19
  -1   1   3 816.133 22.0379  19
   1   1   3 855.657 21.0375   1
  -1  -1   3 876.486 20.3187  10
  -1  -1  -3 836.802 21.0638  24
  -1  -1   3 874.560 21.5688   4
  -1  -1  -3 864.161 20.8893  25
  -1  -1  -3 838.076 20.8221   8
  -1   1   3 781.889 20.1602   2
  -1  -1  -3 833.680 21.7959  23
  -1   1  -3 880.381 21.1384  23
   1   1   3 706.141 21.4827  19
   1   1  -3 850.453 22.0739  12
   1  -1  -3 798.153 22.1422  12
   1  -1  -3 875.880 21.5339   8
  -1   1  -3 829.550 20.8962  25
  -1  -1   3 821.570 22.0186  18
   1  -1  -3 868.842 22.4598  21
  -1   1   3 839.452 22.1432   6
  -1  -1   3 839.324 22.0022   6
  -1  -1  -4 4.00322 2.36485  25
   1  -1  -4 5.52936 4.31546  21
  -1   1   4 3.16231 3.34236  19
   1  -1   4 5.31314 3.45510   2
   1  -1   4 8.54083 3.36430  19
  -1   1   4 1.03720 3.57774   6
  -1  -1   4 2.65702 3.56855   6
  -1  -1  -4 2.50093 4.13803  23
  -1   1   4 8.34392 4.04850  18
   1  -1  -4 6.99152 3.04029   8
  -1  -1  -4 4.04835 3.86260  21
  -1   1  -4 5.35395 3.66141  21
   1   1   4 5.46245 2.62943   1
  -1   1  -4 2.71352 2.89905   8
  -1   1   4 2.77124 2.03651   2
  -1  -1  -4 7.16619 2.86654   8
   1   1  -4 5.44135 4.03716  12
  -1  -1   4 1.81395 2.68035   2
   1   1   4 9.37588 3.59780  19
   1   1  -4 8.42494 3.17055   8
  -1   1  -4 8.85079 2.53675  24
  -1  -1   4 4.31229 3.76705  18
  -1   1  -4 3.76305 2.33986  25
   1  -1  -4-0.37840 4.16460  12
  -1  -1   4 6.61715 3.15129   4
  -1   1   5 139.166 7.78842  19
  -1   1  -5 152.450 8.21300  21
  -1  -1  -5 148.020 6.73466   8
   1  -1  -5 141.984 8.44807  12
  -1  -1   5 130.552 6.46016   2
   1   1  -5 151.571 7.21119   8
  -1   1   5 161.986 8.06059   6
   1   1   5 144.201 7.85972  19
  -1  -1   5 148.989 8.39933  18
   1  -1   5 149.762 7.34518  19
  -1   1  -5 144.829 6.03644  25
   1   1   5 131.595 6.06958   1
  -1  -1  -5 153.006 8.25863  21
  -1   1   5 163.455 8.62707  18
  -1   1  -5 141.772 6.91943   8
   1  -1  -5 157.395 8.69652  21
   1  -1   5 135.203 7.79442   2
  -1   1  -6 2944.88 72.2213   8
  -1  -1   6 3056.75 74.5714  18
  -1  -1  -6 2827.88 73.4610  21
   1  -1   6 3032.59 73.1179  19
   1  -1   6 3101.07 73.5483   2
  -1   1   6 3041.98 74.5085  18
  -1   1   6 2918.66 73.9028  19
  -1   1  -6 2931.69 73.6455  21
   1   1  -6 3120.12 72.6609   8
   1   1   6 3014.77 73.6437  19
   1  -1  -6 2981.09 74.2647  21
   1   1  -7 147.262 9.47355   8
   1  -1   7 140.488 10.1441  19
  -1  -1  -7 129.945 11.0380  21
   1   1   7 135.758 10.3555  19
  -1   1   7 162.892 11.2755  19
  -1   1   7 138.220 12.5531  18
  -1   1  -7 127.554 11.1001  21
  -1  -1   7 155.710 12.4488  18
  -1  -1  -8 17.1241 9.94946  21
   1   1   8 12.8406 9.76790  19
  -1   1   8-0.46663 12.3587  18
   1   1  -8 10.4063 7.84625   8
  -1   1  -8 12.7514 10.1961  21
   1  -1   8 3.66665 8.30196  19
  -1  -2   0 1275.59 29.7717  10
   1  -2   0 1191.64 29.4439   2
   1  -2   0 1252.90 29.4355   5
  -1   2   0 1208.27 29.6100  13
   1  -2   0 1308.38 29.9241  12
  -1   2   0 1269.56 29.5991  11
   1  -2   0 1292.08 29.2524   7
   1  -2   0 1294.60 30.1467  14
  -1   2  -1 379.227 9.99703  17
   1  -2   1 385.323 10.3511   2
  -1  -2   1 390.371 9.73697  18
   1  -2  -1 400.966 10.7291  12
   1  -2   1 397.490 9.18567  19
   1   2   1 389.360 9.61198  16
  -1  -2   1 385.011 9.90804   9
  -1   2   1 404.612 10.0047  19
   1  -2  -1 376.681 9.15893   2
  -1  -2  -1 384.633 9.98867  10
   1   2   1 380.291 9.56010   7
   1  -2   1 399.066 10.0184   5
   1   2   1 400.449 9.24065  17
   1   2  -1 387.260 10.3548  22
  -1   2   1 375.096 10.2098  11
   1  -2   1 399.184 10.5913  14
  -1   2   2 4838.55 116.702  19
   1   2   2 5092.25 115.781   7
  -1   2   2 5065.08 116.614  20
   1   2   2 4868.07 115.534  11
   1   2  -2 4980.30 116.704  22
  -1  -2   2 5241.93 116.766   4
   1  -2   2 5284.37 117.050   2
  -1   2  -2 5036.92 115.770  16
   1   2   2 5140.67 115.269  20
  -1   2   2 5140.45 116.645  11
   1  -2  -2 5027.13 117.334  12
  -1  -2  -2 5037.89 116.666  23
  -1  -2   2 4800.26 116.572   6
   1   2  -2 5204.79 116.496   3
  -1   2  -2 5165.00 115.456  23
  -1  -2   2 4958.85 116.482  18
   1   2   2 5038.83 116.910  19
  -1  -2   2 5090.88 116.109  10
  -1  -2  -2 5069.31 115.934  10
   1  -2   2 5087.79 115.823  19
  -1   2   3 1029.43 25.8147   6
  -1  -2   3 987.645 25.3473  18
   1   2  -3 1021.69 25.1079   8
   1  -2  -3 1008.16 26.2169  12
  -1   2   3 991.922 24.9402  11
  -1  -2   3 1062.64 25.4078   4
   1   2   3 975.523 24.4097   1
   1   2   3 1017.07 25.3263  18
   1  -2   3 965.263 24.4805  19
  -1   2   3 1008.42 25.5615  19
   1   2   3 961.357 23.6843  11
  -1  -2  -3 1035.04 25.4882  23
   1   2  -3 1045.90 24.9065   3
  -1   2   3 966.276 25.0383  20
  -1   2   4 120.491 5.83550  20
  -1  -2   4 125.891 6.53984  18
   1  -2  -4 128.226 7.01772  21
   1  -2   4 109.175 6.27966   2
   1   2   4 116.177 4.86279   1
  -1  -2  -4 119.311 6.70557  23
  -1   2  -4 103.865 6.43916  21
   1   2  -4 105.568 5.71531   8
   1  -2  -4 116.388 7.02883  12
   1   2  -4 131.010 5.89075   3
  -1   2   4 113.831 6.48160   6
  -1  -2   4 120.125 5.63723   2
  -1  -2  -4 129.818 6.71430  21
  -1  -2   4 126.266 6.09559   4
   1  -2   4 112.358 5.44004  19
  -1   2   4 115.998 6.42169  19
   1   2  -5 6.75502 4.56343   8
  -1   2   5 1.70983 5.14449   6
   1   2   5 6.80200 5.25981  19
  -1   2  -5 8.81067 5.64076  21
  -1   2   5 8.23242 5.10337  19
   1  -2   5 3.05865 4.08793  19
   1  -2  -5 6.05153 5.75377  21
   1  -2   5-0.22599 4.86927   2
  -1  -2  -5 7.49900 6.42347  23
  -1  -2   5 7.62620 4.48354   2
  -1   2  -5 1.48645 3.08169  25
   1   2   5 3.19716 2.97318   1
   1  -2  -5 3.05675 5.75186  12
  -1   2  -5 17.3560 4.57956   8
  -1  -2   5 7.57665 5.59363  18
  -1  -2  -5 2.66216 5.94744  21
  -1   2   5 4.31500 5.86807  18
  -1  -2   6 86.8012 6.87156   2
   1   2   6 82.9953 7.80727  19
   1  -2   6 77.1604 7.93370   2
   1  -2   6 76.2102 6.98194  19
   1   2  -6 90.7259 7.22829   8
  -1  -2   6 83.3741 8.67694  18
   1  -2  -6 75.1961 8.72117  21
  -1   2   6 81.2716 9.03501  18
   1  -2  -6 78.3127 8.46171  12
  -1  -2  -6 95.9499 8.73009  21
  -1   2  -6 75.5736 8.26040  21
  -1   2   6 89.7729 8.19184  19
  -1   2  -6 83.3293 7.03216   8
  -1   2   7 276.003 14.1040  19
   1   2   7 307.564 14.6031  19
   1  -2   7 293.221 13.2228  19
  -1  -2  -7 308.464 14.9882  21
  -1   2   7 267.869 15.2089  18
  -1   2  -7 278.539 13.8580  21
   1  -2   7 298.917 14.0957   2
   1   2  -7 294.075 12.8458   8
  -1   2   8 7.31120 10.2723  19
   1   2  -8 23.9153 9.47996   8
  -1  -2  -8 26.2495 11.5594  21
   1   2   8 22.3212 10.1062  19
   1  -3   0 9703.10 221.533   9
   1  -3   0 9716.65 221.202   7
  -1   3   0 9872.74 221.805  13
   1  -3   0 9795.55 221.629   2
   1  -3   0 9824.75 221.473   5
  -1  -3   0 9913.75 222.097  10
  -1   3   0 9584.65 221.841  11
  -1   3   0 9799.08 220.857  19
   1  -3   0 9547.51 221.828  12
   1   3   0 9427.51 221.509   3
   1   3   1 6981.70 158.593  18
  -1  -3  -1 6945.85 159.637  10
   1   3   1 6789.40 159.162  16
  -1   3   1 6796.26 159.171  19
  -1   3   1 7090.87 159.794  11
   1   3  -1 6734.75 159.474   3
  -1   3  -1 6955.91 159.544  17
   1  -3   1 6934.46 158.740  22
   1  -3  -1 7081.39 158.525   7
   1  -3   1 7128.90 159.781   2
  -1  -3   1 6883.32 158.759  14
   1  -3   1 7255.42 160.294  14
   1   3   1 6804.00 158.726   7
   1   3   1 7164.85 158.741  17
  -1  -3   1 7093.31 159.043   6
  -1  -3  -2 789.997 19.7068  10
  -1  -3   2 798.703 19.7745   9
   1   3   2 797.534 19.1383  11
  -1  -3  -2 793.740 20.3193  23
   1  -3   2 809.091 20.4295   2
   1   3   2 783.792 18.9041   7
  -1  -3   2 813.403 20.0121  10
  -1   3  -2 814.428 19.4774  16
   1   3  -2 871.140 20.1355   3
  -1  -3   2 813.716 19.7865   6
  -1   3   2 715.690 19.9069  19
  -1   3   2 723.442 19.9948  11
   1   3  -2 768.775 19.7824  22
   1   3   2 788.554 20.4569  19
  -1  -3   2 776.597 19.7791  18
   1   3   2 765.220 19.5389  18
   1  -3  -2 832.523 21.0803  12
  -1  -3   2 838.493 20.3406   4
  -1  -3  -3 4851.65 112.723  23
  -1   3   3 4805.48 112.226  11
   1   3   3 4885.36 111.469   1
   1  -3  -3 4578.51 113.293  12
   1   3   3 4796.53 110.705  20
   1  -3   3 4946.35 112.960   2
  -1   3  -3 5013.88 112.082  21
  -1  -3   3 4868.68 112.624   4
  -1  -3   3 5098.17 112.162   6
   1   3  -3 4944.35 112.070   3
  -1   3   3 5086.79 112.643   6
   1   3   3 4611.78 110.912  11
   1  -3  -3 4827.26 112.815  21
   1   3   3 4982.77 112.930  19
  -1   3   3 4822.58 112.596  19
  -1  -3   3 4819.41 112.340  18
  -1   3   3 4634.26 112.122  20
   1  -3   3 4729.66 111.360  19
   1   3   3 4853.17 112.233  18
  -1  -3   4 4260.53 96.5096   4
   1  -3  -4 3908.12 97.3430  12
   1   3   4 4150.27 94.3517  11
  -1  -3   4 3869.55 96.4459  18
   1   3   4 4174.52 96.4163  18
  -1   3   4 4084.24 95.8574  11
  -1  -3  -4 3767.06 96.3818  21
  -1   3   4 4197.64 96.3976   6
  -1   3  -4 4200.35 96.2107  21
   1  -3   4 4011.67 95.2589  19
   1  -3   4 4319.47 97.1089   2
   1   3   4 4085.93 94.9566   1
   1   3  -4 4158.61 96.1211   8
   1   3  -4 4099.09 95.6316   3
  -1  -3  -4 4094.52 96.6776  23
  -1   3   4 4106.92 96.8858  19
   1  -3  -4 3947.53 96.7938  21
   1   3   4 3978.92 96.6384  19
  -1   3   4 4206.61 96.0854  20
   1   3   5 3029.55 72.5045  18
   1  -3   5 3117.13 72.8326   2
   1  -3  -5 2999.17 73.5219  12
  -1  -3   5 3046.98 72.3069   4
  -1  -3  -5 2958.28 72.6980  21
  -1  -3   5 3047.58 71.4928   2
  -1   3   5 3034.83 72.9232  19
   1   3  -5 2974.81 71.6880   8
   1  -3   5 2821.35 71.0695  19
   1   3   5 3001.02 70.3961   1
  -1   3   5 2911.05 72.0355   6
  -1   3  -5 3047.56 72.1468  21
   1   3  -5 3037.20 71.1980   3
  -1   3   5 3079.09 71.7176  20
  -1   3   6 126.432 8.90917  19
   1   3  -6 100.739 7.77583   8
  -1   3  -6 103.635 7.74889   8
   1  -3  -6 109.728 9.61718  12
   1  -3   6 113.447 9.03958   2
  -1  -3  -6 109.421 9.72328  23
   1   3   6 101.569 5.90878   1
  -1  -3  -6 121.264 9.36840  21
  -1  -3   6 96.1714 7.68449   2
  -1   3   7 1429.06 40.0533  19
   1  -3  -7 1340.14 39.6323  12
   1  -3   7 1375.66 38.9873   2
   1   3   7 1386.18 39.4838  19
  -1  -3  -7 1342.45 39.3022  21
   1   3  -7 1459.98 38.1746   8
  -1   3  -7 1488.84 38.1300   8
  -1   3   8 849.592 28.5060  19
   1   3   8 816.099 27.7878  19
  -1   3   8 845.281 29.6107  18
   1   3  -8 790.583 25.3473   8
   1  -3   8 804.209 27.4897   2
  -1  -3  -8 777.556 27.7228  21
   1  -4   0 7163.63 163.461   5
   1  -4   0 6739.87 163.784  12
   1  -4   0 7056.56 163.169   4
  -1  -4   0 7430.78 164.457  10
   1   4   0 7279.71 163.625   3
  -1   4   0 7209.59 163.963  13
  -1   4   0 7198.32 163.011  19
  -1   4   0 7218.40 164.059  11
   1  -4   0 7226.85 163.741   9
   1   4   1 4.43453 1.79040  16
   1  -4  -1 2.25863 2.30916  12
  -1  -4  -1-1.15895 2.94073  10
  -1   4   1 3.25313 1.65767  19
   1   4   1 2.67732 1.02377  18
   1   4   1 2.71917 1.39841  17
  -1   4   1 3.45907 1.95920  11
   1  -4  -1 3.70208 0.87450   7
   1   4  -1 2.18518 1.85479  16
  -1  -4   1 2.19663 1.25727   6
  -1  -4   1 2.57454 1.51747  14
   1  -4   1 0.95558 2.38146  14
   1  -4  -1 4.01752 0.62184   4
   1   4   1 4.37343 1.00770  13
  -1   4  -1 1.15176 1.89302  13
  -1   4  -1 3.06215 2.07184  17
   1   4   2 43.1781 2.81476  18
  -1   4   2 49.1744 3.35703  19
  -1  -4   2 57.1508 3.38882   9
  -1  -4   2 50.1498 3.50616   4
   1  -4   2 42.7041 3.78105  14
  -1   4  -2 51.9546 3.28460  16
  -1  -4  -2 44.4804 3.69604  10
   1   4  -2 43.9132 3.56415   3
  -1   4   2 53.2061 3.53430  11
   1  -4   2 44.2546 3.54101   2
   1   4   2 46.3436 2.10201   7
   1   4   2 47.5899 3.80340  19
  -1  -4  -2 45.2761 3.80115  23
   1   4   2 47.8601 2.90855  11
  -1  -4   2 47.1330 2.84124   6
  -1   4   3 253.747 8.99235  19
   1   4   3 243.658 7.80724   1
   1  -4  -3 254.166 9.11769  21
   1  -4   3 261.442 9.14438   2
   1   4   3 230.865 7.08299  20
   1   4   3 246.598 9.19119  19
  -1   4   3 259.320 6.20206   1
  -1   4   3 246.526 8.57420  11
  -1  -4  -3 257.612 9.41233  23
   1   4  -3 253.692 8.66206   3
  -1   4  -3 241.372 7.95905  16
   1   4   3 238.228 8.28467  18
   1   4   3 250.739 7.62852  11
  -1  -4   3 252.204 8.95296   4
  -1   4   3 253.289 9.18797   6
   1   4   4 962.656 24.7988  11
  -1   4   4 1018.04 26.9616  19
   1   4   4 1027.81 24.5378  20
   1   4   4 1026.17 26.5589  18
   1  -4  -4 958.936 27.7961  12
  -1  -4   4 991.316 26.7299   4
  -1   4   4 960.398 26.0548  11
   1   4  -4 1025.47 26.1291   3
  -1  -4  -4 989.430 27.2698  23
  -1   4   4 1042.07 26.8934   6
   1   4   4 996.676 25.1308   1
   1   4   4 971.950 26.9913  19
  -1  -4  -4 1014.88 27.0671  21
  -1   4   4 1022.74 26.3115  20
   1  -4  -4 972.899 27.1428  21
   1   4   5 170.014 9.24632  18
  -1   4   5 163.804 8.26035  20
  -1   4   5 152.954 8.95137  19
   1   4   5 166.697 9.00897  19
  -1   4   5 176.107 9.70827  18
   1  -4  -5 149.475 9.76717  12
   1  -4  -5 155.577 9.46500  21
   1   4  -5 146.886 7.81578   8
   1  -4   5 156.013 9.16647   2
  -1  -4   5 172.379 8.96372   4
  -1   4   5 148.130 8.67273   6
  -1  -4   5 161.482 8.31938   2
   1   4   5 153.272 6.62486   1
  -1   4  -5 150.095 8.08318   3
  -1  -4  -5 149.416 9.71204  23
   1   4  -5 160.508 8.09270   3
  -1  -4  -5 149.290 9.12253  21
  -1   4   6 13.8130 7.90218  18
  -1   4   6 19.2605 7.19990  19
   1   4   6 14.2032 7.28789  19
   1  -4  -6 21.9454 8.35008  12
  -1   4   6 24.8439 6.56851  20
   1  -4  -6 23.5786 8.05800  21
  -1   4  -6 21.9262 6.40701   8
  -1  -4   6 14.6781 6.77865   2
   1   4  -6 14.5222 6.35628   8
  -1   4  -6 16.2465 5.18865  25
   1  -4   6 30.5668 7.77165   2
  -1  -4  -6 20.5503 8.76716  23
   1  -4   7 71.6779 9.81907   2
  -1   4   7 77.6557 10.0980  19
  -1   4  -7 90.6399 8.67384   8
   1  -4  -7 84.6871 10.8861  12
  -1   4   7 71.1249 11.3083  18
   1   4  -7 99.3961 9.62749   8
  -1   4   8 17.8842 11.4730  18
   1   4   8 31.2909 10.6059  19
   1   4  -8 29.1505 9.22957   8
  -1  -4  -8 24.9909 12.1910  21
   1  -4   8 36.4871 10.5407   2
  -1   4   8 33.3249 10.3212  19
   1  -5   0 2233.00 53.7121   5
  -1   5   0 2328.83 54.7374  17
   1  -5   0 2315.67 54.2855   9
   1  -5   0 2349.12 53.5576   4
  -1  -5   0 2385.04 55.1605  10
   1   5   0 2281.09 54.0166   3
  -1   5   0 2331.17 54.5935  11
  -1   5   0 2296.89 54.3552  13
   1  -5   0 2283.40 54.2792  12
   1  -5  -1 890.945 20.1873   4
   1   5   1 842.124 20.4843  13
  -1   5   1 877.880 21.2871  19
   1   5  -1 802.032 21.6797   3
   1   5  -1 883.494 22.0108  16
  -1  -5  -1 859.765 22.0930  23
   1   5   1 834.255 21.6065  16
   1  -5   1 901.997 21.5389   4
   1  -5   1 836.069 22.6670  14
  -1  -5   1 868.648 21.3162  14
  -1  -5  -1 793.795 22.1747  10
   1   5   1 817.861 21.1348  17
  -1   5  -1 875.023 21.8483  13
   1  -5   1 870.708 20.6767  12
  -1   5  -1 862.299 21.9313  17
   1  -5   1 816.996 21.6336   9
  -1   5   1 889.044 22.0742  11
   1   5   1 886.222 20.7206   3
  -1   5   2 1256.70 31.7966  11
   1   5   2 1357.76 32.3497  19
  -1  -5   2 1276.84 31.6735   9
   1   5  -2 1271.38 31.6827  16
  -1  -5  -2 1227.54 32.0248  23
   1   5   2 1306.14 30.4998  18
  -1  -5  -2 1229.47 31.6511  10
  -1  -5   2 1322.36 31.9448   4
   1   5   2 1292.67 29.6307   7
   1   5  -2 1274.81 31.6142   3
  -1   5  -2 1174.84 31.2018  16
   1   5   2 1264.64 30.9619  11
   1  -5   2 1366.50 32.1327   2
  -1   5   2 1206.59 31.1878  19
  -1   5   3 357.001 8.81214   1
  -1  -5  -3 353.053 12.1531  23
   1  -5  -3 351.991 11.6578  21
   1   5  -3 357.658 11.2972   3
   1   5   3 363.222 10.7645  18
   1  -5   3 322.361 11.5928   2
  -1  -5   3 375.154 11.8140   4
  -1   5  -3 341.910 10.7239  16
   1   5   3 353.770 12.0693  19
   1   5  -3 346.562 11.3377  16
  -1   5   3 344.694 11.5409   6
   1   5   3 345.174 10.3618  11
  -1   5   3 334.227 11.2789  11
  -1   5   3 364.200 11.4648  19
  -1   5   4 1481.56 36.3478   6
   1   5   4 1438.24 34.8149   1
   1   5   4 1446.36 35.9927  18
   1  -5   4 1284.22 36.7098   2
  -1  -5   4 1461.08 36.7702   4
   1   5   4 1414.20 34.2954  20
  -1  -5  -4 1372.06 37.1118  23
   1   5   4 1393.63 34.7674  11
   1   5   4 1338.79 36.7324  19
  -1   5   4 1455.89 36.1478  20
  -1   5   4 1457.72 36.2610  11
   1   5  -4 1423.40 35.9468   3
  -1   5   4 1460.72 36.7478  19
   1  -5  -4 1426.30 36.9051  21
  -1  -5  -4 1442.36 36.6218  21
  -1   5   5 331.422 13.0609  19
   1   5  -5 326.386 12.0321   8
   1  -5  -5 320.088 13.9350  12
   1   5   5 312.179 12.6367  18
   1  -5   5 326.905 13.1289   2
  -1  -5  -5 282.727 13.6648  23
  -1  -5   5 323.499 13.0044   4
  -1   5   5 332.465 12.0955  20
  -1   5  -5 311.108 11.9061   3
  -1  -5  -5 310.890 12.8945  21
  -1   5   5 323.932 11.9279  11
   1   5  -5 323.274 12.0257   3
   1  -5  -5 310.053 13.1520  21
   1   5   5 319.226 10.3093   1
   1   5   5 284.967 12.5726  19
   1  -5  -6 303.719 15.0677  12
   1   5   6 286.228 13.5947  18
  -1  -5   6 292.658 12.9361   2
   1   5  -6 279.246 12.7119   8
   1  -5  -6 314.093 14.1163  21
   1  -5   6 313.626 14.1507   2
   1   5  -6 309.328 12.6023   3
  -1  -5  -6 284.258 14.5603  23
  -1   5   6 308.526 14.0113  18
  -1   5   6 306.208 12.5870  20
  -1  -5  -6 299.890 13.7224  21
  -1   5   6 296.755 13.6501  19
  -1  -5  -7 70.7607 10.5633  21
  -1   5   7 66.7726 10.9734  19
  -1  -5  -7 61.7544 11.6357  23
  -1   5   7 51.4594 11.4952  18
   1   5   7 58.1476 9.88509  19
  -1   5  -7 64.2623 9.35877   8
   1   5  -7 78.1640 9.92527   8
   1  -5   7 80.5864 10.3385   2
   1  -5  -7 70.7105 10.4535  12
   1  -5   8 459.167 19.8577   2
   1  -5  -8 415.978 19.7259  12
   1   6   0 610.114 15.8211   3
   1  -6   0 592.924 15.1756   4
   1  -6   0 572.031 15.9892  12
   1  -6   0 600.079 16.0960   9
   1  -6   0 605.128 15.3500   5
  -1   6   0 601.472 16.4005  11
  -1   6   0 632.103 16.6571  17
   1  -6   1 13.2004 2.86346   9
   1   6   1 11.7870 2.06822  13
  -1  -6  -1 13.1458 3.42646  23
   1  -6  -1 16.1040 2.17786   5
   1  -6   1 14.4429 2.18714  12
  -1   6  -1 11.6174 3.28873  17
  -1  -6   1 11.6453 2.99882  14
   1   6  -1 10.4265 3.04428  16
   1  -6  -1 16.2979 1.71283   4
   1  -6   1 16.0196 2.71698   4
  -1   6  -1 10.1278 2.88763  13
   1   6   1 15.0246 2.93796  17
   1   6   1 28.2112 2.74539   3
   1   6  -1 16.3302 3.49566   3
  -1   6   1 17.2012 3.29197  11
  -1   6   2 129.888 6.03117  19
  -1   6  -2 145.737 6.44816  17
   1   6   2 122.367 5.07978  18
  -1  -6   2 144.265 6.77692   4
  -1   6  -2 135.715 6.25236  16
   1   6  -2 132.670 6.32079  16
   1  -6   2 150.716 6.32600   4
  -1  -6   2 139.728 5.69456  14
   1  -6   2 139.991 7.31577  14
   1   6   2 144.955 3.96832   7
  -1  -6   2 136.864 6.28348   9
   1   6   2 143.129 5.95361  11
   1   6   2 155.307 7.13382  19
  -1   6   2 147.726 6.62122  11
   1   6  -3 513.048 15.7670   3
   1   6  -3 503.536 15.5668  16
   1   6   3 566.523 16.6898  19
   1   6   3 559.668 15.0057  11
  -1  -6   3 537.099 16.3793   4
  -1   6   3 524.319 15.9048  11
  -1   6  -3 513.791 15.3655  16
  -1  -6  -3 542.812 16.9089  23
   1  -6   3 532.943 16.4172   2
   1   6   3 543.371 14.9390  18
   1  -6  -3 539.504 15.7927  21
  -1   6   3 547.766 15.9340  19
  -1   6   4 183.887 8.93666  20
  -1  -6  -4 201.094 10.7889  23
   1   6   4 191.220 7.52646   1
   1   6   4 196.949 10.1538  19
   1   6   4 194.709 7.93956  11
   1  -6   4 215.637 9.96659   2
   1   6   4 207.118 8.95408  18
  -1   6   4 216.706 9.17219  11
   1   6  -4 227.883 9.67896   3
   1   6  -4 209.834 8.85990  16
  -1   6   4 220.538 9.67874  19
   1  -6  -4 212.524 9.94081  21
  -1  -6  -4 218.199 9.86748  21
  -1  -6   4 223.026 9.73291   4
  -1   6   5 137.329 9.22582  19
   1   6   5 112.544 9.25467  19
   1   6   5 170.661 9.59621  18
   1   6  -5 155.851 8.58624  16
   1  -6   5 144.597 9.77071   2
   1   6  -5 149.455 9.11399   3
  -1  -6   5 176.551 10.0162   4
  -1   6   5 152.719 8.56398  11
   1   6   5 160.689 6.83537   1
  -1   6  -5 150.319 9.01254   3
  -1   6   5 162.805 8.71688  20
  -1  -6  -5 140.246 11.2029  23
  -1  -6  -5 157.046 9.92731  21
   1  -6  -5 140.848 9.84477  21
   1  -6  -5 150.774 10.9820  12
  -1   6   6 66.6478 7.88961  20
   1   6  -6 54.9045 8.87215   3
  -1  -6   6 54.1959 8.41810   2
   1  -6  -6 54.3154 8.98429  21
  -1   6   6 50.0666 8.62401  19
  -1   6   6 61.7665 9.91115  18
   1   6   6 53.9810 8.76976  18
   1   6  -6 58.8996 8.32347   8
   1   6   6 40.3032 8.69035  19
   1  -6   6 74.1595 10.0725   2
  -1  -6  -6 61.6573 10.6360  23
   1  -6  -6 62.7303 10.2414  12
  -1  -6  -6 59.2077 9.21119  21
   1   6   7 380.300 17.6888  19
   1  -6  -7 362.017 17.8228  12
  -1   6   7 418.123 18.7905  18
   1  -6   7 395.008 18.1340   2
   1   6  -7 379.773 16.0875   8
  -1  -6   7 319.241 15.8279   2
  -1   6   7 418.728 17.9724  19
  -1   6  -7 412.124 16.4301   8
  -1  -6  -7 345.661 18.3422  23
  -1  -6  -7 396.814 17.2021  21
  -1   7   0 8197.25 193.005  17
   1   7   0 8376.73 192.140   3
   1  -7   0 8236.13 192.569   9
   1  -7   0 8500.65 192.463  12
   1   7   0 8200.23 192.570  17
  -1   7   0 8278.64 192.952  11
  -1   7   0 8414.24 192.527  13
   1  -7   0 8475.36 191.576   4
  -1  -7   0 8567.10 192.495  23
   1   7   1 277.687 9.63094  17
  -1  -7   1 301.285 10.3720   9
   1  -7  -1 318.141 8.36427   4
   1   7  -1 324.115 10.5229  16
  -1   7  -1 318.430 10.4334  17
   1  -7   1 300.301 9.70046   4
   1   7   1 321.253 9.11425   3
   1  -7   1 304.571 11.2210  14
  -1   7   1 299.637 10.2561  11
  -1  -7  -1 312.841 10.5699  23
   1   7  -1 293.853 10.2390   3
   1   7   1 291.815 8.71876  13
  -1  -7   1 301.587 10.0435  14
   1  -7   1 314.292 8.83005  12
   1  -7   1 298.980 9.94614   9
   1  -7   2 435.088 15.5516  14
   1   7   2 441.520 14.9708  19
   1   7  -2 450.742 14.7184  16
  -1  -7   2 434.564 14.5361   9
  -1   7  -2 465.756 14.6828  17
   1  -7   2 463.077 14.3926   4
  -1  -7   2 442.327 13.8850  14
  -1   7  -2 475.524 14.5604  16
   1   7   2 417.442 13.9750  11
  -1  -7  -2 457.420 15.3932  23
  -1   7   3 305.661 12.1867  19
   1   7   3 381.035 11.8764  11
   1   7   3 367.832 13.3107  19
   1   7   3 396.013 11.6027  18
  -1   7  -3 373.023 12.5393  16
   1   7  -3 364.013 12.6756  16
   1  -7   3 385.356 13.4165   2
  -1   7   3 402.964 13.0002  11
  -1  -7   3 375.902 13.1887   4
   1   7  -3 376.194 12.8674   3
  -1  -7  -3 411.104 12.6463  21
  -1   7   4 4952.77 114.942  11
  -1   7   4 4821.63 114.857  19
   1   7   4 4981.73 115.576  19
   1   7   4 4900.04 113.701  18
  -1  -7   4 4834.22 115.080   4
   1   7  -4 4758.62 114.351  16
   1  -7   4 5047.81 115.792   2
   1   7   4 4972.30 113.334  11
   1   7  -4 5034.41 114.457   3
  -1  -7  -4 4560.60 114.308  21
  -1  -7  -4 4797.15 116.014  23
   1  -7  -4 4853.60 114.493  21
   1   7   4 4648.95 112.747   1
  -1   7   5 104.928 8.22354  11
  -1  -7  -5 112.192 11.1600  23
   1   7   5 112.319 9.37460  19
  -1   7   5 126.388 9.28774  19
   1  -7  -5 118.292 9.49173  21
   1   7   5 116.705 8.86940  18
  -1  -7   5 136.352 9.71678   4
  -1  -7  -5 121.049 9.54458  21
   1   7  -5 130.015 9.57025   3
  -1   7  -5 120.070 9.17872   3
   1  -7  -5 112.941 10.7666  12
   1   7  -5 104.671 8.32177  16
  -1   7   5 115.219 8.24369  20
  -1   7   6 146.564 11.7517  19
   1   7   6 130.745 11.0343  19
   1  -7   6 157.153 11.8514   2
  -1   7   6 151.167 9.48454  11
   1   7  -6 129.063 10.5012   3
  -1  -7  -6 162.759 13.3380  23
   1   7  -6 149.863 10.2892   8
  -1  -7   6 135.446 11.0893   4
   1  -7  -6 145.176 12.1242  12
  -1   7  -6 139.422 10.3429   3
  -1   7   6 152.816 12.3432  18
  -1  -7  -6 157.513 11.7123  21
  -1  -7   6 144.879 10.5918   2
  -1   7   6 142.522 9.87827  20
   1   7   7 191.262 13.0558  19
  -1   7  -7 203.644 12.4132   8
   1   7  -7 203.288 12.8196   8
  -1  -7   7 175.890 12.6198   2
   1  -7  -7 173.991 15.5802  12
   1  -7   7 196.233 14.4562   2
  -1  -7  -7 182.750 13.0270  21
  -1  -7  -7 190.304 15.3794  23
  -1   7   7 167.871 13.9271  19
  -1   7   7 197.398 15.0234  18
   1  -8   0 278.916 8.36367   4
   1  -8   0 257.440 9.48900   9
   1   8   0 230.195 9.55106  17
  -1  -8   0 275.978 9.61118  23
   1  -8   0 276.135 9.51297  12
   1  -8   0 247.655 10.7301  14
  -1   8   0 260.393 9.37627  13
  -1   8   0 251.166 9.80339  11
   1   8   0 250.148 8.75937  13
   1   8   0 252.668 9.20881   3
  -1   8   1 162.020 7.85619  11
   1   8  -1 176.469 7.94294   3
   1   8   1 138.376 7.24176  17
  -1  -8   1 184.901 7.21019  23
  -1  -8   1 165.354 7.80961   9
   1   8  -1 174.189 7.96066  16
  -1  -8  -1 201.372 8.88177  23
   1  -8   1 165.634 6.97695   4
   1  -8   1 190.023 7.67062   9
   1  -8   1 183.320 9.08278  14
   1   8   1 147.180 6.21079  13
  -1   8  -1 180.132 8.05070  17
   1   8   1 169.252 6.84672   3
  -1  -8   1 176.505 7.88022  14
  -1  -8   2 1148.46 30.2441   4
   1   8   2 1227.88 30.7028  19
   1   8  -2 1147.44 30.3094  16
  -1   8  -2 1141.54 30.0691  17
  -1  -8  -2 1223.47 30.9851  23
   1  -8   2 1194.91 29.7526   4
   1   8   2 1130.23 29.5407  11
  -1  -8   2 1104.69 29.1939  14
   1  -8   2 1088.58 30.9134  14
  -1  -8   2 1120.65 30.0483   9
   1   8  -2 1156.25 30.0268   3
  -1   8  -2 1057.80 29.8659  13
  -1   8   2 1128.41 30.1516  11
  -1  -8  -3 6.56323 6.75941  23
   1   8   3 24.8454 6.22814  19
   1   8  -3 21.2600 5.23537  16
  -1   8  -3 21.4424 5.39078  17
  -1   8  -3 21.1890 5.58165  16
   1   8  -3 6.45231 5.72484   3
  -1   8   3 19.0518 5.53356  11
   1   8   3 33.4729 5.03662  11
  -1  -8  -3 20.2402 5.61563  21
   1  -8   3 22.6810 5.92635   2
   1   8  -4 15.9239 5.93395  16
  -1  -8   4 13.6293 6.27825   4
   1  -8   4 13.9734 6.37700   2
  -1   8   4 20.8079 6.22173  11
   1   8   4 24.9392 5.53601  11
  -1  -8  -4 15.4639 7.01939  21
   1   8  -4 9.80606 6.44519   3
   1   8   4 4.39654 6.76706  19
  -1  -8  -4 13.8095 8.67547  23
  -1   8   5 171.981 10.7320  19
   1   8  -5 189.215 10.9344   3
  -1   8   5 185.468 10.4394  11
  -1   8  -5 171.013 10.5962   3
  -1  -8   5 166.586 11.4541   4
   1  -8   5 168.004 11.6593   2
   1  -8  -5 187.816 12.7998  12
  -1  -8  -5 149.972 12.9085  23
   1   8   5 137.768 10.8481  19
   1   8  -5 160.480 9.88679  16
  -1  -8  -5 168.665 11.1930  21
  -1   8   5 174.643 9.85018  20
  -1   8  -6 153.357 11.0394   3
  -1   8   6 142.775 11.7979  19
  -1   8   6 180.141 12.4750  18
   1  -8  -6 128.846 12.9552  12
  -1   8   6 157.499 10.1315  11
  -1  -8   6 145.490 11.5594   4
  -1  -8   6 149.389 11.2783   2
  -1   8   6 159.931 10.8025  20
   1   8  -6 183.184 11.5017   3
   1   8   6 139.603 12.3379  19
   1  -8   6 166.345 12.5008   2
  -1  -8  -6 152.042 11.8969  21
  -1  -8  -6 153.589 13.6494  23
   1   8  -7-4.11369 9.12355   3
  -1   8   7-5.03035 10.9395  18
  -1  -8   7-0.39532 10.5467   2
   1  -8   7-0.93519 11.3881   2
  -1   8   7 1.33011 10.7339  19
  -1  -8  -7 1.54691 11.1206  21
  -1   9   0 116.036 7.78635  11
  -1   9   0 147.408 7.36349  13
   1  -9   0 141.494 7.20386   9
   1  -9   0 152.164 6.23005   4
   1  -9   0 146.735 7.33586  12
   1   9   0 131.071 7.23588   3
   1  -9   0 141.286 9.36812  14
  -1  -9   0 157.618 7.86561  23
   1   9   0 131.453 6.65487  13
   1   9   0 127.695 7.68145  16
   1   9   0 112.029 7.66592  17
  -1  -9  -1 7793.01 47.4896  23
   1   9  -1 624.426 22.0029   3
  -1   9  -1 597.997 22.1489  17
  -1  -9   1 583.560 22.2726   9
   1  -9  -1 583.432 21.5908   9
  -1  -9   1 605.341 22.1735   4
   1  -9   1 587.886 21.8892   9
   1  -9   1 572.766 21.3115   4
   1  -9   1 596.515 23.3854  14
  -1   9   1 524.839 22.0780  11
  -1  -9   1 586.932 22.1258  14
  -1   9  -1 600.198 21.9462  13
  -1  -9   1 619.007 21.4518  23
   1   9   1 7010.50 37.7895   3
   1   9  -1 563.427 22.1814  16
  -1   9  -2 5300.24 135.069  17
  -1  -9   2 5738.99 135.560   9
   1   9  -2 5919.44 135.489  16
   1  -9   2 5950.29 134.902   4
  -1  -9   2 5844.05 134.645  14
   1  -9   2 5635.60 136.253  14
   1   9   2 5824.57 134.746  11
  -1  -9  -2 5814.78 135.930  23
   1   9   2 5786.48 135.591  19
  -1  -9   2 5652.08 135.461   4
   1   9  -2 5926.41 135.095   3
  -1  -9   3 450.040 16.9223   9
  -1   9  -3 567.471 17.6891  16
  -1  -9   3 573.259 17.9136   4
   1   9   3 543.816 18.1302  19
   1   9  -3 548.405 17.7508  16
   1  -9   3 553.589 18.5165  14
  -1   9   3 546.832 17.6876  11
   1   9   3 526.409 16.6156  11
  -1  -9  -3 528.724 18.9120  23
   1  -9   3 561.870 18.2321   2
  -1  -9  -3 564.912 16.7122  21
  -1   9  -3 533.929 17.5373  17
   1   9   4 102.342 9.48523  19
  -1   9  -4 112.367 8.96976  17
   1   9  -4 118.419 8.57000  16
  -1  -9  -4 103.788 8.93006  21
  -1   9  -4 124.306 9.86768   3
   1  -9   4 114.063 9.59801   2
  -1   9   4 109.881 8.59950  11
   1   9  -4 123.019 9.73978   3
   1   9   4 112.171 7.95364  11
  -1   9   5 254.668 12.4650  20
   1   9  -5 290.888 13.4549  16
  -1  -9   5 319.859 15.1242   4
   1  -9   5 306.776 15.3302   2
  -1   9   5 276.236 13.3175  11
  -1   9  -5 282.865 13.9503   3
   1   9  -5 315.508 14.1270   3
   1   9   5 268.955 14.3245  19
  -1  -9  -5 306.581 16.7049  23
  -1  -9  -5 289.423 13.7613  21
   1  -9   6 1982.45 55.8562   2
   1   9   6 2029.19 55.1730  19
  -1   9   6 2100.70 54.0096  11
  -1   9   6 2245.36 55.6295  18
  -1  -9   6 2179.43 55.4994   4
   1  -9  -6 2042.29 57.1411  12
  -1  -9   6 1995.81 55.0115   2
  -1   9  -6 2001.01 53.8989   3
  -1  -9  -6 1921.02 56.1717  23
   1   9  -6 2213.22 54.1485   3
  -1  -9  -6 2116.71 54.4240  21
  -1   9   7 236.786 15.5736  18
   1  10   0 99.9827 8.12404  17
   1 -10   0 140.381 9.84126  14
  -1  10   0 118.399 8.47179  11
  -1  10   0 140.090 8.13792  13
   1  10   0 119.049 6.94458  13
   1 -10   0 155.365 8.05590   9
   1  10   0 103.631 7.78483   3
  -1 -10   0 147.190 8.74145  23
   1 -10  -1 115.948 7.11928   9
  -1 -10   1 104.412 7.70752   4
   1  10   1 69.9484 7.38908  17
   1  10  -1 67.5299 7.92003  17
   1  10  -1 107.796 8.05350  16
   1 -10   1 116.301 7.10258   4
   1 -10   1 116.460 9.40569  14
  -1 -10   1 125.017 8.35554  14
  -1  10  -1 116.846 7.59762  13
   1  10   1 113.125 8.30507  19
  -1  10  -1 118.652 7.79291  17
  -1  10  -1 105.684 7.80234  11
   1  10  -1 119.468 8.01260   3
  -1  10   1 92.1264 7.97728  11
  -1 -10  -1 114.857 8.87191  23
   1 -10   1 119.623 7.56861   9
  -1 -10   1 113.624 7.69481   9
   1  10  -2 336.933 12.8619  16
  -1  10  -2 264.202 12.3217  17
   1  10   2 301.322 12.2661  11
   1 -10   2 347.524 12.3638   4
   1 -10   2 316.732 13.9023  14
   1  10  -2 348.212 13.2234   3
  -1  10  -2 341.552 12.6019  13
  -1 -10   2 341.219 13.0932   4
  -1 -10  -2 334.170 14.3452  23
   1  10   2 300.530 13.1886  19
  -1 -10   2 338.347 13.0457   9
   1  10   3 4.07241 6.09170  11
  -1  10  -3 9.62734 7.00484  17
  -1 -10   3 0.27294 6.44226   9
   1  10   3-0.29401 7.38501  19
  -1 -10   3-1.16465 6.77970   4
   1 -10   3-4.09204 7.85688  14
  -1  10  -3 1.28032 6.25021  13
   1  10  -3 0.25825 7.57079   3
  -1 -10  -3-2.38204 9.58569  23
   1  10  -3 3.30307 6.43524  16
  -1  10   3-0.84544 6.64130  11
   1 -10   3 3.43270 7.02688   2
   1  10  -4 28.1742 8.61582   3
  -1 -10  -4 15.6595 11.4509  23
   1  10  -4 26.3310 8.13553  16
   1  10   4 35.3570 9.27096  19
  -1 -10   4 33.1377 8.79712   4
  -1  10  -4 29.3566 7.80544  17
   1 -10  -4 45.2048 11.1847  12
  -1  10  -4 41.5858 8.80733   3
  -1  10   4 30.8514 7.80569  11
   1  10   4 31.5827 7.23408  11
   1 -10   4 27.8920 8.31096   2
   1 -10  -5 199.146 15.5131  12
  -1  10  -5 198.245 12.1285  17
   1  10  -5 189.916 11.5410  16
   1  10   5 194.259 13.1854  19
   1 -10   5 198.453 12.8509   2
   1  10  -5 247.955 13.4733   3
  -1  10  -5 203.226 12.9483   3
  -1  10   5 194.132 11.7504  11
  -1  10   5 221.528 11.6437  20
   1  10   6 27.9842 10.9310  19
  -1  10   6 38.0418 9.26766  11
  -1  10  -6 28.7314 11.2282   3
  -1 -10   6 31.6647 10.5632   2
   1  11   0 434.335 17.3473  17
   1  11   0 551.450 17.0097   3
   1 -11   0 560.750 17.5618   9
   1 -11   0 636.263 20.4120  14
  -1 -11   0 542.056 18.5079  14
  -1  11   0 547.466 17.2264  13
   1  11   0 490.194 15.9856  13
  -1  11   0 559.414 18.2465  11
  -1 -11   1 13.6526 6.91085   9
  -1  11  -1 9.31545 6.81529  17
   1  11  -1 2.51803 6.47794  17
   1 -11  -1 5.19526 6.25415   9
   1  11  -1 4.78561 6.63998  16
   1  11  -1 10.2258 6.87109   3
  -1 -11   1-6.27645 6.52277   4
   1 -11   1 4.16647 8.35579  14
  -1  11  -1 4.19564 6.50461  13
   1  11  -1-0.58171 5.52308  13
  -1 -11  -1 5.89233 8.09732  23
   1 -11   1 4.31418 5.80362   9
  -1  11   1 5.71054 6.54949  11
  -1  11  -1 3.98837 6.33089  11
   1  11   1 4.26510 6.35510  11
  -1 -11   2 461.061 16.7856   4
  -1  11  -2 428.538 16.4108  17
  -1 -11   2 458.025 16.6435   9
   1  11  -2 518.560 17.0403  17
   1  11  -2 455.771 16.7790  16
   1  11  -2 471.811 16.7634   3
   1 -11   2 495.076 15.8931   4
   1 -11   2 441.150 17.9550  14
   1 -11  -2 472.219 17.9791  12
  -1  11  -2 424.667 15.9873  13
  -1 -11  -2 504.543 18.4326  23
   1  11   2 461.149 16.3453  11
  -1  11  -3 6.62474 7.60051  17
   1  11   3 5.38319 8.35374  19
   1  11   3-4.56029 7.09299  11
   1  11  -3-9.97131 8.12085  16
  -1 -11   3-5.91471 8.23828   4
   1 -11   3-4.79900 8.85260  14
  -1 -11  -3-7.26721 10.3916  23
  -1  11   3 9.26786 7.89369  11
  -1  11  -3 8.15797 9.07040   3
   1 -11  -3-12.2370 10.1344  12
   1 -11   3 10.1858 8.51045   2
   1  11  -3 7.28007 8.25027   3
  -1  11   4 329.107 14.5961  11
   1  11   4 330.023 15.4251  19
   1 -11  -4 316.115 17.5776  12
   1  11  -4 322.182 14.7850  16
  -1 -11   4 339.999 15.4852   4
  -1 -11  -4 345.287 18.2902  23
   1 -11   4 337.014 15.5601   2
  -1  11  -4 308.281 14.5944  13
  -1  11  -4 320.594 15.3008   3
  -1  11  -4 320.509 14.8970  17
   1  11   4 349.578 14.0596  11
   1  11   5 11.2214 8.93082  19
  -1  11  -5 5.18321 8.76545  17
   1  11  -5 11.7131 8.71251  16
   1 -11   5 10.2980 9.02261   2
  -1 -11   5-0.40500 10.4332   4
   1  11  -5 13.9682 10.8504   3
   1 -11  -5 8.99851 13.0735  12
  -1 -11  -5-5.00540 13.5639  23
  -1  11   5-0.30912 7.80956  20
  -1  11   5 13.1093 8.07602  11
  -1  11  -5 10.6877 10.6812   3
   1  12   0 16.5013 7.40819  17
  -1 -12   0 22.4611 7.49599   9
   1 -12   0 22.1176 7.22165   9
  -1 -12   0 23.9632 6.87323   4
   1 -12   0 24.7728 9.73096  14
  -1  12   0 27.0196 7.91156  11
   1 -12  -1 2.12645 6.61130   9
  -1 -12   1 0.32227 8.14000   9
   1 -12   1-0.83946 6.62040   9
   1  12  -1-2.21677 7.53736  17
  -1 -12   1 3.28297 7.13493   4
   1 -12   1 5.29950 9.63976  14
   1 -12  -1 2.42772 9.66276  14
   1  12  -1 1.68835 7.91022   3
  -1  12  -1 7.35761 7.18634  13
   1  12  -1 1.26387 6.31885  13
  -1  12  -1 0.91057 7.96169  17
  -1 -12  -1-0.30176 8.81009  23
  -1  12   1 6.62610 7.44857  11
  -1  12  -1 0.59241 7.52271  11
   1  12   1-0.84286 7.25586  11
  -1 -12  -2 172.848 13.5049  23
   1 -12  -2 161.571 9.77949   9
  -1 -12   2 157.588 10.6399   9
   1  12  -2 150.495 11.2010  17
   1  12  -2 159.425 11.0651  16
  -1 -12   2 155.486 11.0190   4
   1 -12   2 173.527 12.0296  14
  -1  12  -2 170.114 11.3304  17
  -1  12  -2 160.543 10.3139  13
  -1  12  -2 156.557 11.3685   3
   1  12  -2 162.328 9.99291  13
   1  12   2 146.016 10.1004  11
   1 -12  -2 167.514 12.4156  12
   1  12  -2 164.550 11.1006   3
  -1  12  -2 151.585 10.8433  11
  -1  12  -3 201.449 12.2756  17
   1  12  -3 204.672 12.1495  17
   1  12  -3 166.976 11.6086  16
  -1 -12   3 200.888 11.9895   4
   1 -12   3 177.873 13.1490  14
   1 -12   3 184.785 12.1629   2
  -1  12  -3 147.531 10.9069  13
  -1  12  -3 166.807 12.4706   3
   1  12   3 193.237 11.3754  11
   1  12  -3 191.678 12.1204   3
  -1 -12  -3 166.762 14.5535  23
  -1  12   3 156.306 11.9393  11
   1 -12  -3 192.288 13.6528  12
   1  12  -4 23.3047 9.58619   3
  -1 -12  -4 19.8447 12.2036  23
  -1  12  -4 14.9292 9.96973  17
  -1  12   4 22.2522 8.65498  11
   1 -12  -4 25.7911 11.0557  12
   1  12  -4 23.4051 9.56813  16
  -1 -12   4 27.0910 9.52992   4
   1  12   4 20.5902 8.44232  11
   1 -12   4 22.0705 10.8617   2
   1 -13   0-0.29942 7.51587   9
   1 -13   0-5.15579 10.5720  14
   1  13   0 9.76390 8.38870  17
  -1  13   0 6.29202 8.88419  11
   1 -13  -1 1224.46 33.7686   9
  -1 -13   1 1218.32 34.8643   9
   1 -13   1 1137.42 33.5628   9
  -1 -13   1 1205.04 33.5947   4
   1 -13   1 1215.67 36.4371  14
   1 -13  -1 1201.89 37.0028  14
  -1  13  -1 1194.89 33.3135  13
  -1  13  -1 1225.33 34.2304   3
  -1  13  -1 1154.72 34.1414  11
  -1  13   1 1164.86 34.3504  11
   1  13  -1 1266.68 33.4518   3
   1  13  -1 1184.24 33.6709  17
   1  13   1 1216.17 34.1902  11
   1 -13  -2 1048.32 30.0877   9
  -1  13  -2 1015.97 31.3088  17
   1  13  -2 1049.95 31.0257  17
  -1  13  -2 988.903 30.0899  13
   1 -13   2 1068.01 32.9423  14
  -1  13  -2 1066.88 31.5365   3
  -1 -13   2 1063.55 31.2961   4
   1  13   2 1081.55 31.1110  11
  -1 -13  -2 1096.92 33.0836  23
   1  13  -2 1130.37 30.9195   3
  -1 -13   2 1041.02 31.7272   9
  -1  13  -2 996.286 30.8559  11
   1  13  -2 1095.17 29.9453  13
  -1 -13  -3 833.291 29.2639  23
  -1  13  -3 845.307 26.9302  17
   1  13  -3 863.268 26.8147  17
   1  13  -3 888.680 27.2141  16
   1 -13  -3 837.431 28.3817  12
   1 -13   3 855.772 28.2991  14
  -1  13  -3 822.833 26.6829  11
  -1  13  -3 824.088 26.2353  13
  -1  13  -3 880.456 27.7615   3
   1  13  -3 852.043 27.2100   3
   1 -13   3 844.150 27.7061   2
  -1  13   3 820.796 26.7256  11
   1  13   3 860.743 26.5229  11
  -1 -13   3 831.109 26.7795   4
   1 -13  -4-0.46411 11.5517  12
  -1  14   0 615.020 21.9262  11
   1 -14   0 585.522 20.6883   9
   1 -14   0 580.911 24.4262  14
   1  14   0 594.824 21.3042  11
   1  14  -1 21.2541 9.68990  17
  -1 -14  -1 12.2480 9.84984   9
   1 -14  -1 26.2135 8.60597   9
  -1 -14   1 28.5259 10.0468   9
   1 -14   1 36.3047 12.6822  14
   1 -14  -1 22.5476 13.4076  14
  -1  14  -1 10.2902 10.6133   3
  -1  14   1 16.0389 10.4470  11
  -1  14  -1 35.0502 10.8897  11
   1  14   1 31.1052 10.1460  11
   1  14  -2 16.5783 10.2637   3
   1  14  -2 5.06285 9.91089  17
   1 -14  -2 23.1881 8.60031   9
  -1 -14   2-0.33729 9.00543   4
   1 -14   2 6.83964 12.2277  14
   1 -14  -2 12.9384 12.9871  14
  -1  14  -2-9.09417 10.1118  13
  -1  14  -2 5.95280 11.2861   3
   1  14   2 5.00634 9.77029  11
  -1  14  -2 1.06833 9.11267  11
   1  14  -3 0.90295 9.02417  13
  -1 -14  -3 0.43486 14.0915  23
   2   0   0 249.893 8.03976  22
  -2   0   0 251.907 6.86085  20
   2   0   0 248.412 6.98835  14
   2   0   0 256.468 6.86871   1
  -2   0   1-1.00609 1.59528  20
   2   0   1 0.63255 1.30943   5
  -2   0  -1 2.22138 1.43252  25
   2   0   1-0.52010 1.45934   7
   2   0   1 0.73525 1.29129   1
  -2   0  -1 0.59066 1.12457  15
   2   0  -1-0.14494 2.32572  22
  -2   0   1-0.07153 1.25974  10
   2   0   2 490.153 12.9845  19
  -2   0   2 486.192 12.5059  10
  -2   0  -2 494.574 12.7346  15
  -2   0  -2 503.498 12.2532  13
   2   0   2 414.139 12.7001   7
   2   0   2 506.913 12.9041   1
  -2   0  -2 493.140 12.9620  25
   2   0  -2 512.000 14.5439  22
  -2   0   2 496.258 13.3539  20
  -2   0   3-0.60142 2.71115  20
  -2   0  -3 7.14513 2.57147  24
   2   0   3 0.49379 2.68912  19
  -2   0   3 2.13447 1.81871  10
  -2   0  -3-1.18546 2.06076  10
  -2   0   3 2.05843 2.85087   4
   2   0   3-1.27132 2.01238   1
  -2   0  -3 0.96543 2.11085  15
   2   0  -3-0.25003 2.59683   8
  -2   0  -3-1.33163 2.08310  25
   2   0   4 1951.30 48.1116  19
  -2   0   4 1978.92 49.4427   6
  -2   0  -4 2038.54 47.7767  24
  -2   0  -4 1996.57 47.1953  15
  -2   0   4 1989.65 46.5175   2
   2   0  -4 2071.75 50.0799  12
  -2   0  -4 2049.24 47.7747  25
  -2   0  -5-2.05820 3.94630  25
   2   0   5 1.63847 4.89483  19
   2   0  -5 5.66209 6.68223  12
  -2   0   5-1.07077 5.71676  18
   2   0  -5 5.78552 4.53104   8
   2   0   5 4.00242 3.84208   1
  -2   0  -5-1.27117 4.01622  24
  -2   0   5-2.26202 6.29116   6
   2   0   6 9.27879 6.18881  19
  -2   0   6 6.33373 7.54946  18
  -2   0   6 10.9719 6.99484   6
  -2   0  -6 18.9738 7.29058  21
   2   0   7 5.30577 7.77459  19
  -2   0   7 6.18169 10.7760  18
  -2   0  -7 4.07588 9.42976  21
   2   0   8 1087.17 32.3290  19
  -2   0   8 1146.53 35.2416  18
  -2  -1   0 2311.68 52.7233  10
  -2   1   0 2267.26 52.3181  25
   2  -1   0 2150.76 52.8908  14
   2  -1   0 2312.78 52.5802   7
   2  -1   0 2250.19 52.1698   1
  -2   1   0 2248.59 52.3767  11
  -2  -1   0 2245.03 52.3521  24
   2   1  -1 2461.91 55.3788  14
  -2   1  -1 2509.38 55.5498  11
   2   1   1 2406.76 56.3949   1
  -2  -1   1 2374.64 56.2791  10
   2   1   1 2409.53 56.0285   5
   2  -1   1 2307.22 56.2691   5
   2  -1  -1 2337.32 55.4749   1
  -2   1   1 2369.90 55.8402  15
   2   1  -1 2415.84 55.9773   8
  -2   1  -1 2492.01 56.3990  15
  -2  -1  -1 2356.46 56.3098  24
  -2   1  -1 2463.56 56.1504  13
   2  -1   1 2422.48 56.3138   7
  -2  -1   1 2450.87 55.6736  24
   2  -1   1 2399.04 56.1581   1
   2  -1  -1 2392.76 57.7208  22
   2   1  -1 2521.03 57.7391  22
  -2  -1  -1 2339.84 56.3124  10
  -2   1   1 2460.66 56.5626  20
   2  -1   2 153.543 6.21528   2
   2  -1   2 169.434 5.36690  19
  -2  -1   2 153.038 5.18839  10
   2   1   2 150.403 5.89852  19
  -2  -1  -2 164.287 5.26521  10
   2  -1   2 165.018 5.56647   7
   2   1   2 163.885 5.48121   1
   2   1  -2 128.992 5.43856   8
  -2   1  -2 161.221 5.35856  15
  -2  -1  -2 160.041 5.41441  25
  -2  -1  -2 160.411 5.51947  24
  -2   1  -2 176.666 5.33758  13
   2   1   2 157.600 5.44031   7
  -2   1  -2 147.364 5.36176  25
  -2  -1   2 154.136 4.16056  24
   2   1  -2 154.925 6.83882  22
   2  -1   2 162.580 5.37895   1
  -2   1   2 166.075 6.06335  20
   2  -1   3 1082.47 28.0347   2
   2  -1   3 1011.31 26.4221  19
  -2  -1   3 1096.86 26.1835  10
  -2  -1  -3 1085.65 26.2171  10
  -2   1   3 1121.91 25.7847  10
   2   1   3 1105.50 27.5162  19
   2   1  -3 1089.56 27.0681   8
  -2   1  -3 1064.61 26.5519  15
   2  -1  -3 1143.01 29.1300  12
  -2  -1  -3 1126.03 26.8124  25
  -2   1  -3 1110.15 26.7042  25
  -2  -1  -3 1058.07 26.8752  24
   2  -1   3 970.340 26.6019   1
  -2  -1   3 1144.96 27.2506   4
   2   1  -3 1098.09 28.3825  22
  -2   1   3 978.840 27.3459  20
   2   1   4 706.621 19.8103  19
  -2  -1  -4 684.402 19.0499  24
  -2  -1   4 694.047 20.4687  18
  -2   1  -4 770.363 19.0983  25
  -2  -1  -4 723.751 19.0138  25
  -2   1  -4 716.529 18.6673  15
   2  -1   4 595.231 18.8081  19
   2  -1  -4 699.649 21.2155  12
  -2   1   4 796.966 21.2617   6
  -2   1  -4 732.994 19.0890  24
  -2  -1  -4 679.839 19.4596  23
  -2   1   4 755.963 20.2077  20
   2   1   4 720.201 19.1253   1
  -2  -1   4 745.957 18.0212  10
   2  -1   5 1021.62 28.0731   2
   2  -1   5 981.087 26.4743  19
  -2  -1  -5 1002.21 26.1576  24
  -2  -1   5 848.461 27.0484   6
  -2  -1   5 1015.10 27.9907  18
   2   1   5 971.253 25.9207   1
  -2   1  -5 1025.06 26.0030  25
  -2  -1  -5 1000.70 25.7768  25
  -2   1   5 987.800 28.2259  18
   2  -1  -5 1026.80 28.5734  12
   2   1   5 996.174 27.0640  19
  -2   1   5 1035.49 27.9445   6
   2  -1   6 188.283 9.74793  19
   2   1   6 204.018 10.5181  19
  -2  -1   6 207.529 11.9188  18
  -2   1   6 218.161 11.9630  18
   2   1  -6 208.743 10.2407   8
   2  -1  -6 192.360 11.9032  12
  -2   1   6 214.808 11.3407   6
  -2  -1   6 211.370 11.0617   6
  -2   1  -6 205.822 8.97352  25
   2   1   6 204.598 8.90892   1
  -2   1  -6 169.474 10.6630  21
  -2  -1  -6 177.905 11.1127  21
   2  -1   7 312.396 13.3024  19
  -2  -1   7 287.707 16.1581  18
  -2   1   7 282.627 16.1788  18
   2   1   7 321.274 14.5310  19
   2   1  -7 299.665 13.6586   8
  -2  -1  -7 272.866 14.6547  21
  -2   1  -7 283.633 14.5585  21
   2   1   8 108.767 12.0007  19
  -2  -1   8 130.002 14.7052  18
  -2   1   8 116.111 15.4568  18
  -2  -1  -8 127.293 12.2131  21
  -2   1  -8 104.977 11.7724  21
   2  -2   0 42.9865 2.55667   2
  -2  -2   0 48.9657 2.68407  10
   2  -2   0 38.3561 1.92679   1
  -2   2   0 51.1651 2.59852  11
   2   2   0 41.4381 1.63666   8
   2  -2   0 48.5700 3.51406  22
   2  -2   0 49.6251 3.31475  14
   2  -2   0 47.7571 2.43184   7
  -2   2   0 45.9815 2.15425  25
  -2  -2   0 46.6234 2.43525  24
   2  -2   0 47.9490 2.43083   5
   2   2   1 66.8231 2.72908   5
  -2  -2  -1 66.0665 3.26352  10
   2  -2   1 68.3505 2.34182  19
   2  -2   1 63.8028 3.58130   2
  -2   2  -1 58.7454 2.74584  11
   2  -2  -1 71.3766 2.30174   1
  -2  -2  -1 58.4236 3.11400  24
   2   2   1 69.4168 2.74093  16
   2  -2   1 64.3650 2.92513   1
   2  -2   1 61.1322 3.90833  14
  -2   2   1 66.9963 3.45750  11
   2   2   1 69.0162 3.04170   7
  -2   2  -1 66.6661 3.36268  13
   2  -2   1 71.5359 3.23936   7
  -2   2   1 66.2195 2.47085  25
   2  -2   1 64.9363 3.25361   5
  -2  -2   2 13368.5 294.111  10
  -2   2  -2 13379.2 294.120  25
  -2  -2  -2 13165.5 293.932  10
   2  -2   2 13112.7 295.177   2
   2   2   2 13359.2 294.302   1
  -2   2   2 12849.0 294.651  11
  -2  -2   2 12980.2 293.566   9
   2   2  -2 12821.6 294.242   8
  -2   2   2 12906.9 293.072  15
   2   2   2 13003.4 294.823  19
   2   2   2 12938.2 293.822   7
   2  -2   2 13272.4 293.997   1
  -2   2  -2 12840.5 293.997  13
   2  -2  -2 12031.4 295.685  12
   2   2  -2 13653.1 295.482  22
  -2  -2  -2 13002.5 294.299  24
   2   2   2 13108.6 292.621  11
   2  -2   2 13448.3 293.149  19
  -2   2   2 13646.7 294.819  20
  -2  -2   3 456.933 13.5261  10
  -2   2   3 563.533 15.1965  19
  -2   2  -3 508.696 13.7417  25
   2  -2   3 478.980 13.1548  19
  -2   2   3 524.010 14.6202  20
  -2  -2  -3 477.147 13.2625  10
   2   2   3 502.559 14.7426  19
   2  -2   3 494.671 14.9885   2
  -2  -2   3 493.565 14.5275  18
   2   2  -3 471.428 15.1411  22
   2   2  -3 521.461 14.1259   8
  -2  -2   3 493.671 14.3153   4
  -2   2  -3 540.478 13.7337  15
   2  -2  -3 523.995 15.8568  12
  -2  -2   3 508.383 15.0558   6
  -2  -2  -3 506.822 14.0799  24
  -2   2   4 13.6241 4.69042  19
   2  -2   4 12.8123 3.26410  19
  -2  -2   4 14.6616 3.88602  10
   2   2   4 3.76642 4.51681  19
  -2  -2  -4 9.21527 4.88665  23
  -2  -2   4 14.6993 4.81915  18
  -2  -2  -4 17.1799 4.02596  24
  -2   2  -4 14.8644 3.27284  15
   2   2  -4 7.81360 3.77763   8
  -2  -2   4 14.0115 4.47751   4
  -2   2  -4 2.77028 2.98000  25
  -2   2   4 12.3490 6.33319   6
   2   2  -4 17.0929 5.43209  22
   2  -2  -4 10.8291 5.73765  12
   2   2   4 8.87263 3.17546   1
  -2  -2   4 12.3693 5.24581   6
  -2   2   5 161.171 9.19120  19
   2   2   5 165.258 7.34960   1
   2  -2   5 157.182 9.42422   2
   2   2   5 162.122 8.73752  19
  -2  -2  -5 158.375 8.89919  23
  -2  -2   5 180.915 9.70928  18
  -2  -2   5 167.018 7.25331   2
   2  -2  -5 167.969 10.2946  12
  -2   2   5 190.498 10.3052   6
  -2  -2   5 155.496 8.94566   6
   2  -2   5 150.768 7.49112  19
  -2   2   5 150.742 8.55009  20
  -2   2  -5 160.411 8.94730  21
  -2   2  -5 167.984 7.42093  25
   2  -2   6 2880.66 71.8971   2
   2   2   6 2834.34 70.9293  19
  -2  -2   6 2944.00 71.8961  18
  -2   2   6 3072.37 72.5328  18
   2   2  -6 2573.37 69.6018   8
   2   2   6 2836.17 68.8735   1
   2  -2  -6 2952.01 72.5217  12
   2  -2   6 2729.09 69.2796  19
  -2   2   6 3012.91 71.4915   6
  -2   2  -6 3148.87 69.4306  25
  -2   2  -6 2818.02 70.6483  21
  -2  -2  -6 2777.64 70.8924  21
  -2  -2   6 2811.49 70.7610   6
   2   2   7 373.503 15.6067  19
   2  -2   7 341.569 14.1730  19
  -2  -2   7 366.983 17.2208  18
  -2   2   7 364.794 17.2678  18
   2   2  -7 370.683 14.8526   8
  -2   2   7 365.409 16.1740   6
  -2   2  -7 299.603 15.5205  21
  -2  -2  -7 315.268 16.1799  21
   2   2   8 10.7048 9.48843  19
  -2  -3   0 999.113 23.7221  10
   2  -3   0 935.433 24.3287  14
   2  -3   0 914.046 23.1720   2
   2  -3   0 962.117 22.8765   7
  -2   3   0 945.893 23.3766  11
   2  -3   0 946.273 24.0445  22
   2  -3   0 922.729 23.1993   5
   2   3   1 18.5406 1.49492   5
  -2  -3  -1 20.7496 2.56384  10
   2  -3   1 18.7576 2.30994   5
   2   3   1 19.6764 1.96354  16
   2   3   1 19.0072 2.06547   7
   2  -3  -1 19.1806 1.93789   7
   2  -3   1 20.3494 3.38008  14
  -2   3  -1 27.5214 2.62220  13
   2  -3  -1 19.9324 3.28732  12
  -2   3   1 18.6624 1.33210  25
   2  -3   1 18.1790 2.15758   7
  -2   3  -1 18.4979 2.09521  11
   2  -3   1 18.2212 2.57272   2
   2  -3   1 16.4280 2.68270  22
  -2   3   1 21.7595 2.75365  11
  -2  -3   2 701.085 18.5467  10
  -2   3   2 787.386 18.7674  19
   2  -3   2 708.101 16.7050  19
  -2  -3  -2 675.211 18.1900  10
   2  -3   2 713.447 19.1057   2
  -2   3  -2 732.570 18.0168  17
  -2  -3   2 681.773 17.8685   9
   2   3  -2 604.260 18.0832   8
   2   3   2 705.700 17.6098   7
  -2   3  -2 741.130 18.3532  13
  -2   3   2 671.616 18.6197  11
   2  -3  -2 735.663 19.9629  12
  -2  -3   2 711.766 17.9827  18
   2   3  -2 711.672 19.1437  22
  -2   3   3 36.1900 4.19795  20
   2   3   3 35.8621 3.09246   7
   2  -3   3 31.8800 2.60706  19
   2  -3   3 30.1238 4.40672   2
   2   3   3 38.2866 4.84884  19
  -2   3   3 36.8040 4.37576  19
  -2  -3   3 31.6886 4.20767  10
  -2  -3  -3 30.7338 3.60806  10
   2  -3  -3 33.5242 5.40145  12
  -2  -3   3 35.9479 4.05648  18
   2   3   3 38.0346 3.42990   1
   2   3  -3 38.7836 3.79604   8
  -2   3   3 36.7973 1.85274  15
  -2   3   3 29.7284 3.78841  11
  -2  -3   3 36.7983 4.22627   4
   2   3   3 34.8840 1.97069  11
  -2   3  -3 37.3597 3.24561  25
  -2  -3  -3 37.2937 4.17725  23
   2   3  -3 36.7568 4.88030  22
  -2  -3   3 30.5298 4.84779   6
  -2   3   4 576.274 16.8605  19
  -2  -3  -4 521.497 16.4301  23
   2  -3   4 542.467 14.6006  19
  -2   3  -4 586.138 15.5929  25
   2   3   4 526.735 16.6911  19
   2  -3   4 563.179 17.0739   2
  -2  -3   4 533.341 16.4331  18
  -2  -3   4 580.516 16.5955   4
  -2  -3   4 567.189 16.6598   6
   2   3   4 540.215 15.2898   1
   2  -3  -4 569.713 18.2286  12
  -2   3   4 559.705 17.5250   6
  -2  -3   4 516.712 15.0472  10
   2  -3  -5 68.9157 8.22228  12
  -2   3   5 55.8136 7.04274  19
   2   3   5 65.0186 7.01549  19
   2  -3   5 58.3018 7.33346   2
  -2  -3   5 77.4317 7.98065  18
  -2   3  -5 70.5141 5.48831  25
   2   3   5 70.1973 5.20352   1
   2   3  -5 57.8755 5.98396   8
  -2  -3   5 66.8379 6.73659   4
  -2  -3  -5 79.9305 7.41579  23
   2  -3   5 58.9064 5.32209  19
  -2   3   5 64.0783 8.08962   6
  -2  -3   5 56.6556 6.82398   6
  -2   3   5 65.3235 6.94853  20
  -2   3   6 374.079 15.0328  19
   2   3   6 337.339 14.3956  19
   2  -3   6 346.088 15.0598   2
  -2  -3   6 325.420 14.5359  18
  -2   3   6 331.493 15.5719  18
  -2   3   6 356.860 15.1141   6
   2  -3  -6 340.390 15.4493  12
   2   3   6 314.551 11.9363   1
  -2   3  -6 380.651 12.7650  25
  -2  -3  -6 318.456 14.4096  21
   2   3   7 21.3673 8.99429  19
   2  -3  -7 16.0700 10.2994  12
  -2   3   7 22.2238 9.85830  18
   2   3  -7 17.4062 7.45898   8
   2  -3   7 17.6921 9.89463   2
   2   3   7 15.0897 5.89806   1
  -2   3   7 7.58309 9.87742   6
  -2  -3  -7 27.2101 10.2218  21
   2   3   8 172.802 14.2975  19
   2  -4   0 8277.57 198.062   5
   2  -4   0 8241.91 198.120   2
   2   4   0 9001.90 198.437  16
   2  -4   0 8620.24 199.580  14
   2  -4   0 8831.22 197.683   7
  -2  -4   0 8780.42 199.051  10
  -2   4   0 8939.38 198.582  11
  -2  -4  -1 3471.57 78.4324  10
   2  -4   1 3258.23 77.8180   5
   2  -4  -1 3465.05 76.7546   9
   2  -4   1 3452.16 78.5020   2
   2   4   1 3425.02 77.4877  16
   2  -4   1 3392.88 77.5556   7
   2  -4   1 3306.89 79.1933  14
   2   4   1 3181.84 77.1327   7
   2  -4  -1 3373.38 76.8928   7
  -2   4  -1 3325.88 78.0868  13
   2  -4  -1 3359.81 79.1749  12
  -2   4   1 3498.78 78.4452  11
  -2   4  -1 3299.58 77.6585  11
  -2  -4  -2 1578.47 38.7104  10
  -2   4   2 1697.00 38.6832  19
  -2  -4   2 1560.17 38.9048  10
   2   4   2 1549.74 39.2577  19
  -2  -4   2 1592.22 38.3502   9
  -2   4  -2 1572.32 38.3895  17
   2  -4   2 1615.69 39.4230   2
   2  -4   2 1586.57 39.7485  14
   2   4   2 1514.19 37.4355   7
  -2   4  -2 1646.15 38.6909  13
  -2   4   2 1573.04 36.4318  25
  -2   4   2 1640.13 39.2691  11
  -2  -4   2 1598.41 38.4191   6
  -2  -4  -3 807.876 21.3224  10
  -2  -4   3 783.689 21.6351  10
  -2   4   3 790.917 21.9878  11
  -2  -4   3 804.101 22.0593   4
   2   4   3 813.205 21.2512   1
   2   4   3 810.957 20.2562   7
   2  -4   3 818.839 22.7794   2
   2  -4  -3 856.338 23.6642  12
  -2  -4  -3 816.541 22.1881  23
  -2   4   3 824.961 22.0438  20
  -2  -4   3 802.214 21.5861   6
   2   4  -3 778.277 21.3699   8
  -2   4   3 858.687 22.1570  19
  -2   4   4 3281.62 78.5013  19
   2  -4   4 3211.70 78.9179   2
  -2  -4   4 3387.75 78.3295   4
   2   4  -4 3297.20 77.4799   8
   2   4   4 3348.50 76.9656   1
  -2  -4  -4 3046.13 78.0375  23
  -2   4   4 3156.09 78.4819   6
  -2  -4   4 3233.91 77.4780   6
   2  -4  -4 3364.12 79.9373  12
  -2   4   4 3170.37 78.0753  20
  -2   4   5 2185.12 56.6419  19
   2   4   5 2007.30 55.8633  19
   2   4   5 2321.67 54.4485   1
   2   4  -5 2157.46 55.3158   8
  -2  -4   5 2250.25 55.8849   4
   2  -4  -5 2238.00 57.7405  12
  -2   4  -5 2436.69 55.1480  25
  -2  -4  -5 2106.99 55.8201  23
  -2   4   5 2262.65 56.3780   6
  -2   4   5 2339.94 56.1427  20
  -2   4   6 330.996 14.4940  19
   2   4   6 317.775 11.5491   1
   2   4   6 259.521 13.4009  19
  -2   4   6 296.001 13.4772  20
  -2   4   6 280.759 14.9375  18
  -2  -4   6 319.740 13.8614   4
   2  -4  -6 319.299 15.4746  12
  -2   4  -6 347.722 12.3334  25
  -2   4   6 318.379 14.4360   6
   2  -4   6 305.877 14.6923   2
  -2  -4  -6 291.445 14.4836  23
  -2   4   7 127.174 11.6072  19
   2   4   7 121.751 11.3337  19
   2  -4   7 124.732 12.1186   2
  -2   4   7 122.882 11.1684   6
   2  -4  -7 125.133 12.6262  12
  -2  -4  -7 104.408 12.4038  21
   2  -4   8 537.884 23.3163   2
   2  -5   0 89.5890 4.41175   5
   2   5   0 105.054 4.97462  16
   2  -5   0 108.214 4.84143   2
   2  -5   0 94.0662 6.05999  14
   2  -5   0 106.001 3.99124   7
  -2   5   0 104.363 5.09542  11
  -2  -5   0 107.710 5.90314  10
   2  -5   1 1722.23 40.4302   5
   2  -5  -1 1705.64 39.5346   9
   2   5   1 1668.66 39.5031  17
   2   5   1 1683.64 40.2205  16
   2  -5   1 1633.85 40.8732   2
   2   5  -1 1619.49 40.8159  16
  -2  -5   1 1721.08 38.7990  14
   2  -5   1 1626.52 41.9511  14
  -2   5  -1 1662.98 40.6938  13
   2   5   1 1699.22 38.5759  13
   2  -5  -1 1665.30 41.6306  12
   2  -5   1 1608.09 40.0002  22
  -2  -5  -1 1666.79 41.1009  10
  -2   5  -1 1647.64 40.4815  11
  -2  -5   1 1614.07 39.5120   6
  -2   5   1 1694.76 41.0885  11
   2   5   2 177.659 8.13671  19
  -2  -5   2 194.302 7.29715   9
  -2   5  -2 209.118 7.56536  17
   2  -5   2 190.180 8.01023   2
   2  -5   2 193.137 8.59325  14
   2   5   2 184.839 5.91086   7
  -2   5  -2 182.120 7.44128  13
   2  -5  -2 186.010 8.56092  12
  -2  -5  -2 171.764 7.78515  10
  -2   5   2 190.183 7.86946  11
  -2  -5   2 190.878 6.87555   6
  -2  -5   2 175.218 8.14921  10
   2   5   3 1426.25 34.7474  11
   2   5   3 1483.53 37.3875  19
   2   5   3 1422.95 35.8618   1
  -2  -5   3 1349.49 36.8745   4
  -2   5  -3 1477.09 36.3275  17
  -2  -5   3 1463.30 35.8876   6
   2  -5   3 1480.63 37.8850   2
  -2  -5  -3 1423.06 37.0008  23
   2   5   3 1502.59 34.7111   7
  -2   5   3 1524.47 37.2519  11
  -2  -5   3 1454.74 36.7633  10
  -2  -5  -3 1401.96 36.2193  10
  -2   5   4 4.18741 4.61628  20
  -2   5   4 5.00088 7.46107   6
  -2   5   4 2.11870 5.22731  19
   2   5   4 5.14644 5.75938  19
   2   5   4 2.45186 3.82826   1
   2   5  -4 1.59667 4.58333   8
  -2  -5   4 3.84556 5.02332   4
   2  -5  -4-0.30864 6.15834  12
   2  -5   4 8.02353 5.68265   2
  -2  -5  -4 3.94202 5.88412  23
  -2  -5   4 1.60771 4.67426   6
  -2   5   5 651.343 21.0534   6
  -2   5   5 684.889 20.9809  19
   2  -5  -5 643.310 22.2241  12
   2  -5   5 594.773 20.9732   2
   2   5  -5 640.236 19.5954   8
  -2  -5   5 657.026 20.5476   4
  -2   5   5 673.232 20.5062  20
   2   5   5 650.871 18.5614   1
  -2  -5  -5 636.587 20.8298  23
  -2   5   6 20.6523 7.59595  20
  -2   5   6 22.0827 8.16672  19
   2  -5  -6 14.1576 9.29195  12
   2  -5   6 18.1528 8.59200   2
  -2   5   6 20.2914 9.93849  18
   2   5   6 25.5799 5.27379   1
   2   5  -6 20.3270 6.97012   8
  -2  -5  -6 17.0489 9.25566  23
  -2  -5   6 21.7969 8.01512   4
   2   5   6 15.0057 8.02212  19
  -2   5  -6 23.2374 6.70173  25
  -2  -5  -6 27.4204 8.35630  21
  -2   5   6 40.1808 9.13955   6
  -2  -5   6 22.7214 7.13036   2
  -2   5   7 559.435 21.2566  19
   2   5   7 543.514 20.8869  19
   2  -5   7 591.702 21.9565   2
  -2   5   7 565.822 22.8785  18
   2  -5  -7 536.998 22.9274  12
  -2   5  -7 496.328 19.5747  25
  -2  -5  -7 499.431 20.5267  21
   2  -6   0 169.526 6.55094   5
  -2   6   0 168.521 7.26747  11
   2   6   0 186.961 7.33009  16
   2  -6   0 183.727 8.48728  14
  -2  -6   0 182.901 4.89562   6
  -2  -6   0 147.953 7.81481  10
   2  -6  -1 528.771 13.5871   9
   2   6   1 407.629 13.2315  17
   2   6   1 507.985 14.2848  16
   2   6  -1 517.383 14.8194  16
   2  -6   1 509.249 14.8709   2
   2  -6   1 504.628 14.1989   5
  -2  -6   1 514.497 12.9248  14
   2  -6   1 484.836 15.7526  14
  -2   6  -1 503.052 14.7501  13
   2   6   1 502.270 12.3704  13
   2  -6  -1 533.937 15.5939  12
  -2   6  -1 528.217 14.5620  11
  -2   6   1 580.004 15.5465  11
  -2  -6   1 519.708 12.7313   6
   2  -6   1 500.744 13.6962  22
   2  -6  -1 499.548 13.7376   5
  -2  -6  -1 475.290 15.2124  10
   2   6   2 819.770 22.8300  19
  -2  -6   2 827.090 21.9811   9
  -2   6  -2 820.620 22.0814  17
   2   6  -2 800.084 22.2905  16
   2  -6   2 855.527 22.8326   2
   2  -6   2 844.277 23.4712  14
   2   6   2 820.209 20.0678   7
  -2   6  -2 817.224 22.1884  13
  -2  -6  -2 820.793 22.4504  10
  -2   6   2 854.475 22.5403  11
  -2  -6  -2 839.503 22.6821  23
  -2  -6   2 808.623 20.4715   6
  -2  -6   2 809.843 22.8173  10
   2   6   3 470.002 13.0364  11
  -2  -6   3 475.078 15.3910   4
  -2   6  -3 476.469 14.5718  17
  -2  -6   3 443.083 14.1271   9
   2  -6   3 474.308 15.6930   2
   2   6  -3 406.466 14.4475  16
  -2   6  -3 485.529 14.6629  13
   2   6   3 495.742 15.5504  19
   2   6   3 501.615 12.3558   7
  -2   6   3 468.254 15.2192  11
  -2  -6  -3 476.936 15.5071  23
  -2   6   4 12.3983 5.36560  20
   2   6   4 13.1352 4.35544   1
   2   6   4 24.1761 6.59025  19
  -2  -6   4 12.0899 5.87263   4
   2  -6  -4 1.64896 6.77835  12
   2  -6   4 8.40564 6.19039   2
  -2  -6  -4 8.16357 6.76384  23
   2   6   5 210.084 11.9829  19
   2  -6   5 229.081 12.2212   2
   2   6  -5 240.257 10.9413   8
  -2   6   5 224.761 11.0418  11
  -2  -6   5 244.900 11.7202   4
   2   6   5 220.961 9.12919   1
   2  -6  -5 225.845 13.0404  12
  -2  -6  -5 202.390 12.1579  23
  -2  -6  -5 226.662 12.0100  21
  -2   6   5 223.353 11.3466  20
  -2   6   6 878.621 26.5304  19
   2  -6   6 861.507 27.0244   2
   2   6  -6 799.711 24.5869   8
  -2  -6   6 856.438 26.3719   4
  -2   6  -6 964.970 25.0242  25
  -2  -6   6 774.855 24.7404   2
   2  -6  -6 828.414 28.0118  12
  -2  -6  -6 778.433 27.1837  23
   2   6   6 775.310 22.7744   1
  -2  -6  -6 712.904 25.2475  21
  -2   6   6 795.608 25.3564  20
  -2   6   7 152.461 13.5680  19
   2   6   7 157.451 13.3215  19
   2  -6   7 173.962 14.0787   2
  -2   6   7 172.527 15.2002  18
   2   6  -7 161.771 11.0663   8
   2  -6  -7 148.330 15.2242  12
  -2   6  -7 116.904 11.2223  25
  -2  -6  -7 154.063 13.8116  23
  -2   6   7 179.515 12.7374  20
  -2  -6  -7 148.075 12.4831  21
   2  -7   0 652.080 17.0117   5
  -2   7   0 612.995 17.9191  11
   2  -7   0 616.724 16.9494   9
   2   7   0 652.016 17.9275  16
  -2  -7   0 622.799 18.9688  10
   2  -7   0 612.023 19.4913  14
   2  -7   0 615.485 17.7716  12
   2  -7  -1 245.340 8.20619   5
   2  -7   1 252.477 8.70279   5
  -2  -7  -1 248.043 10.5185  10
   2  -7  -1 252.640 8.35025   9
   2   7   1 221.448 8.33802  17
   2   7   1 262.019 9.28631  16
   2   7  -1 245.390 9.50844  16
   2  -7   1 241.873 9.46518   2
   2  -7   1 235.023 10.5764  14
  -2   7  -1 256.764 9.42794  13
   2  -7  -1 251.452 10.2156  12
  -2   7   1 261.630 9.78447  11
  -2   7  -1 258.932 9.60233  11
   2  -7   1 238.720 8.20399  22
   2   7   2 1437.47 37.6043  19
   2  -7  -2 1449.62 35.2488   9
  -2  -7   2 1460.99 36.9952   9
  -2   7  -2 1490.77 36.9028  17
  -2   7  -2 1428.87 36.2831  11
   2   7  -2 1419.59 37.1248  16
   2  -7   2 1472.38 37.6918   2
   2  -7   2 1437.23 38.4956  14
  -2   7  -2 1465.69 36.8463  13
   2  -7  -2 1479.30 38.1752  12
  -2   7   2 1423.19 37.6070  11
  -2  -7  -2 1449.88 37.3703  10
   2   7   3 352.161 13.3967  19
  -2  -7   3 369.471 13.0841   4
  -2   7  -3 317.580 12.2339  17
  -2  -7   3 344.909 12.0188   9
   2   7  -3 342.033 12.6215  16
   2  -7   3 284.485 12.8021   2
  -2   7  -3 372.291 12.4204  13
  -2   7   3 319.907 12.5511  11
  -2  -7  -3 329.675 13.1346  23
   2   7   3 374.847 11.0557  11
   2   7  -3 397.849 12.8669   3
   2  -7  -3 228.670 13.8927  12
  -2   7   4 472.519 16.5780  20
  -2  -7   4 487.019 17.2915   4
   2  -7   4 489.090 17.5460   2
   2   7   4 517.971 17.5015  19
   2   7  -4 501.159 16.3338  16
   2   7   4 501.832 15.2922   1
  -2   7   4 469.299 16.7224  11
  -2  -7  -4 519.665 17.7811  23
  -2   7   5 75.2289 8.87830  20
   2   7   5 96.3524 9.40399  19
   2   7  -5 81.6288 8.13827   8
   2  -7   5 72.9333 9.37677   2
  -2   7   5 77.2262 8.29654  11
   2   7   5 83.3434 6.45521   1
   2   7  -5 77.7160 7.87638  16
  -2  -7   5 71.8334 8.77042   4
   2  -7  -5 84.1448 10.4970  12
  -2  -7  -5 87.8228 10.0778  23
  -2  -7  -5 85.0072 9.58438  21
   2   7   6 442.564 18.5424  19
   2   7  -6 470.052 17.5435   8
   2   7  -6 443.768 17.0735  16
  -2  -7   6 517.655 19.4575   4
   2  -7  -6 483.461 20.9112  12
  -2  -7  -6 523.118 21.1871  23
  -2  -7  -6 461.608 18.9376  21
  -2   7   6 469.954 17.9799  20
   2  -7   7 176.282 14.5451   2
  -2   7   7 148.706 15.3371  18
  -2   7  -7 150.644 12.4489  25
  -2  -7  -7 136.646 15.4035  23
  -2  -7  -7 176.047 14.4512  21
  -2   7   7 153.020 11.9127  20
   2  -8   0 3352.16 82.7820   9
   2   8   0 3600.70 83.8442  16
   2  -8   0 3532.99 85.5991  14
   2  -8   0 3683.88 83.4896  12
  -2   8   0 3472.38 83.9577  11
   2  -8  -1 577.040 15.5450   9
   2   8   1 456.762 15.1765  17
   2   8   1 572.614 16.4710  16
   2   8  -1 578.149 17.0504  16
   2  -8   1 510.481 16.4443   2
   2  -8   1 561.550 18.2894  14
  -2   8  -1 541.425 16.3392  13
   2  -8  -1 544.946 17.1896  12
  -2  -8  -1 578.389 17.2674  23
  -2   8  -1 556.354 16.6219  11
  -2   8   1 535.691 16.9721  11
  -2   8   2 338.415 13.4205  11
   2   8   2 327.126 13.3512  19
   2  -8  -2 369.926 11.1985   9
  -2  -8   2 349.413 12.7826   9
  -2   8  -2 315.305 12.4802  17
   2   8  -2 346.869 12.7334  16
   2  -8   2 370.542 13.2029   2
  -2   8  -2 366.375 12.7320  13
  -2  -8  -2 344.790 13.3598  23
   2  -8  -2 360.839 14.1742  12
   2   8   2 374.480 11.8518  11
   2   8  -2 409.265 13.2870   3
  -2   8  -2 353.289 12.4201  11
   2   8   3 1301.94 33.5703  19
  -2   8  -3 1209.61 32.1924  17
  -2  -8   3 1148.29 32.9051   4
  -2  -8   3 1168.38 32.0472   9
   2   8  -3 1207.28 32.3156  16
   2  -8   3 1212.63 33.2356   2
  -2   8  -3 1267.60 32.5146  13
  -2   8   3 1223.15 33.0657  11
   2   8   3 1270.15 30.9925  11
   2   8   4 1767.22 43.9883   1
   2   8   4 1774.63 46.7330  19
  -2   8  -4 1767.88 45.1138  17
  -2  -8   4 1806.74 46.3111   4
   2  -8   4 1812.85 46.9973   2
   2   8  -4 1697.32 45.3998  16
  -2   8  -4 1888.71 45.5549  13
  -2   8   4 1825.20 46.2223  11
  -2  -8  -4 1714.47 46.7145  23
   2   8   5 10.3527 8.73120  19
   2   8   5 10.9971 5.29890   1
   2   8  -5 7.04043 7.18712  16
   2   8  -5 13.4989 7.83003   8
   2  -8   5 11.1601 9.17927   2
  -2  -8   5 12.3867 8.33492   4
  -2  -8  -5 17.0467 10.2032  23
  -2   8   5 14.0926 7.80555  20
  -2   8   5 18.7882 7.17876  11
  -2  -8  -5 14.7006 8.70480  21
  -2   8   6 50.9261 9.89900  20
   2   8   6 70.0933 11.3312  19
  -2   8  -6 50.6616 9.11976   3
   2   8  -6 58.5339 8.70587  16
   2   8  -6 86.1959 9.63514   8
   2  -8  -6 59.4297 11.8418  12
  -2  -8   6 50.1643 9.97453   4
   2  -8   6 76.2787 11.1995   2
  -2  -8  -6 55.9589 13.4738  23
  -2   8   6 68.5008 9.56511  11
  -2  -8  -6 58.7372 10.8814  21
  -2   8   7 687.661 24.0998  20
   2   9   0 439.793 15.3316  17
   2  -9   0 478.162 14.8163   9
   2   9   0 523.301 16.1709  16
   2  -9   0 482.467 17.8578  14
  -2  -9   0 550.523 16.1464  23
  -2   9   0 493.474 15.9940  11
   2  -9  -1 45.2803 6.82364  12
   2   9   1 34.4888 5.32888  17
   2  -9  -1 55.3935 5.35375   9
   2   9  -1 58.1124 6.48386  16
  -2   9  -1 50.7997 6.43213  13
  -2  -9  -1 42.7360 7.13715  23
  -2   9   1 31.9054 6.82200  11
  -2   9  -1 54.1839 6.51451  11
   2   9   2 547.645 18.6605  19
   2  -9  -2 582.342 16.4209   9
  -2  -9   2 560.630 18.1108   9
  -2   9  -2 565.325 18.2399  17
   2   9  -2 549.676 18.1560  16
   2  -9   2 600.026 18.6233   2
   2   9   2 564.904 17.1391  11
  -2   9  -2 608.528 18.0303  13
   2  -9  -2 568.245 19.2787  12
   2   9  -2 626.723 18.4417   3
  -2  -9  -2 554.910 18.9749  23
  -2   9   2 487.704 18.3089  11
  -2   9  -2 546.014 17.5859  11
   2   9   3 135.992 9.82154  19
  -2   9  -3 135.661 9.20187  17
  -2  -9   3 147.388 9.70695   4
  -2  -9   3 135.284 8.66150   9
   2   9  -3 128.234 8.80696  16
   2  -9   3 129.416 10.2558   2
   2  -9   3 138.320 10.5453  14
  -2   9   3 130.517 9.22461  11
   2   9   3 137.683 7.92525  11
  -2   9  -3 124.328 8.91968  13
   2  -9  -3 139.790 10.5706  12
  -2  -9  -3 152.031 11.0548  23
   2   9  -3 151.056 9.95379   3
   2   9   4 395.727 16.2063  19
  -2   9  -4 323.010 14.2106  17
  -2  -9   4 356.051 15.0706   4
   2   9  -4 339.536 14.0673  16
   2  -9   4 364.540 15.7569   2
   2  -9  -4 320.896 16.2521  12
  -2   9  -4 356.371 14.5613  13
  -2   9   4 349.929 14.7266  11
   2   9  -4 378.302 15.2258   3
  -2  -9  -4 364.565 14.4267  21
  -2   9   5-1.29345 7.92804  20
  -2  -9  -5 7.88870 11.5787  23
   2   9   5 5.01177 10.2027  19
   2  -9  -5-8.08276 11.5894  12
   2   9  -5-1.55615 8.22642  16
  -2  -9   5 5.50870 8.87129   4
   2  -9   5 10.6874 10.0261   2
  -2   9   5 2.78827 7.55033  11
  -2  -9  -5 13.0257 8.61480  21
  -2   9   6 257.381 14.1489  11
   2   9   6 255.087 14.8898  19
   2  -9   6 280.509 16.8466   2
   2   9  -6 242.324 13.7761   8
   2   9  -6 239.921 13.5555  16
  -2  -9   6 276.892 15.5938   4
  -2   9  -6 246.079 14.3865   3
  -2  -9  -6 232.521 16.3142  23
  -2  -9  -6 283.205 15.7230  21
  -2   9   6 243.306 14.2754  20
   2  10   0 3484.79 86.1645  17
   2 -10   0 3552.35 85.7291   9
   2  10   0 3852.68 87.2561  16
   2 -10   0 3401.48 88.6477  14
  -2 -10   0 3703.42 86.6028  23
  -2  10   0 3607.43 87.0883  11
  -2 -10   1 665.389 18.4116  23
  -2 -10   1 605.719 19.3737   9
   2 -10  -1 624.391 17.9968   9
   2  10  -1 615.924 19.2933  16
   2 -10  -1 587.607 21.2376  14
   2 -10  -1 634.922 19.4650  12
  -2 -10  -1 635.636 19.8458  23
  -2  10   1 638.478 19.6588  11
   2  10   2 194.859 11.4475  19
   2 -10  -2 195.246 11.6149  12
  -2 -10   2 192.790 11.0078   4
  -2  10  -2 193.781 10.7169  17
  -2 -10   2 177.639 9.99521   9
   2 -10   2 187.168 10.8173   2
   2 -10   2 174.129 12.0105  14
  -2  10  -2 160.839 9.91114  13
  -2 -10  -2 196.700 11.9270  23
  -2  10   2 203.193 11.0534  11
   2  10  -2 200.069 10.8823   3
  -2  10  -2 188.745 10.3257  11
   2  10   2 181.929 9.39497  11
   2  10   3 987.953 29.7678  19
  -2  10  -3 1010.73 29.0633  17
  -2 -10   3 863.298 28.3339   9
   2  10  -3 1017.13 29.3586  16
   2 -10   3 1032.10 30.2979   2
   2 -10   3 1017.92 30.5932  14
   2  10   3 965.763 27.2683  11
  -2  10  -3 1029.07 28.9257  13
  -2 -10  -3 1075.10 31.0456  23
  -2  10   3 1045.07 29.7387  11
   2  10  -3 1143.94 29.8058   3
   2 -10  -3 996.587 30.6672  12
   2  10   4 2099.37 54.4695  19
  -2  10  -4 2044.96 52.8114  17
   2  10  -4 1842.20 52.5526  16
  -2 -10   4 2046.41 54.0769   4
   2 -10   4 2085.03 54.9597   2
   2 -10  -4 2069.19 55.4384  12
  -2  10  -4 2114.60 53.1404  13
  -2  10   4 2114.85 54.1287  11
  -2 -10  -4 2100.39 55.0007  23
  -2  10   5 108.248 10.0579  20
   2 -10  -5 120.665 13.8149  12
   2  10   5 100.981 12.4242  19
   2  10  -5 110.282 9.96246  16
  -2 -10   5 111.495 11.1067   4
  -2  10  -5 98.4333 11.1407  13
  -2  10  -5 104.509 11.9057   3
  -2  10   5 107.282 11.1099  11
  -2 -10  -5 112.406 14.4796  23
   2 -10   5 108.206 12.9238   2
  -2  10   6 4.51145 9.45700  20
   2  11   0 1.34692 6.48042  17
   2 -11   0 7.07579 5.75311   9
   2  11   0-2.23242 7.24094  16
  -2 -11   0 16.0149 7.82665  23
  -2  11   0 8.59827 7.53338  11
  -2 -11   1 560.970 18.7261   9
   2 -11  -1 537.964 16.8705   9
   2  11  -1 557.079 17.9400  17
   2  11  -1 526.523 18.1395  16
   2 -11   1 508.163 20.1015  14
   2 -11  -1 507.496 20.5919  14
  -2  11  -1 553.162 18.2887  13
  -2 -11  -1 533.360 18.9166  23
  -2  11   1 533.000 18.5154  11
  -2  11  -1 482.616 17.9619  11
   2  11   2 167.624 11.3817  19
   2  11  -2 159.522 10.9406   3
  -2  11  -2 182.111 11.3645  17
  -2 -11   2 168.866 10.9796   4
  -2 -11   2 178.778 11.5778   9
   2 -11   2 158.020 12.2019  14
  -2  11  -2 151.639 10.5939  13
  -2 -11  -2 152.285 12.0147  23
  -2  11   2 159.457 11.2542  11
  -2  11  -2 157.135 10.2601  11
   2  11   2 169.451 9.93029  11
   2 -11  -2 183.112 12.1029  12
   2  11   3 351.136 15.8128  19
   2  11   3 361.309 13.9118  11
  -2  11  -3 376.661 15.8987  17
  -2 -11   3 351.094 14.8740   9
  -2 -11   3 378.078 16.6051   4
   2  11  -3 371.387 15.8029  16
   2 -11   3 379.506 17.0656   2
   2 -11   3 353.579 17.1743  14
  -2  11  -3 389.979 15.7913  13
   2 -11  -3 390.999 17.0937  12
  -2 -11  -3 408.751 17.9792  23
  -2  11   3 358.427 15.7218  11
   2  11  -3 393.164 15.9285   3
   2  11   4 18.7422 10.0860  19
  -2  11  -4 13.2160 8.83267  17
   2  11  -4 1.36410 8.56252  16
  -2  11  -4 4.52172 8.81385  13
   2 -11  -4 1.31700 11.3617  12
  -2 -11  -4 5.17996 12.0870  23
   2 -11   4 30.0158 9.95009   2
  -2  11   4 0.75888 9.65836  11
  -2  11   5 341.233 15.8545  20
   2 -11  -5 358.760 19.6847  12
  -2  11   5 354.602 16.7695  11
   2  12   0 14.0138 7.20457  17
   2 -12   0 11.9894 6.59916   9
   2 -12   0 9.89056 10.8733  14
  -2  12   0 17.7020 8.57319  11
   2  12   1 328.337 15.1680  19
  -2 -12   1 364.217 15.4730   9
  -2 -12   1 328.570 14.6396   4
   2  12  -1 307.503 13.9280  17
   2  12  -1 336.138 15.3904  16
   2 -12   1 338.470 17.0774  14
  -2  12  -1 350.942 14.6849  13
  -2 -12  -1 369.640 15.8776  23
  -2  12   1 316.974 15.1057  11
  -2  12  -1 294.924 14.3119  11
   2  12  -2 46.9922 8.85619   3
   2  12   2 36.4033 9.21020  19
   2  12  -2 24.1661 8.38312  17
  -2 -12   2 47.1593 8.57626   9
  -2 -12   2 40.9190 9.47832   4
   2 -12   2 42.5238 11.3551  14
  -2 -12  -2 52.7346 11.1880  23
  -2  12   2 29.4481 9.55215  11
   2  12   2 30.7006 8.07560  11
   2 -12  -3 212.631 14.0055  12
   2  12   3 202.789 14.1661  19
  -2  12  -3 177.125 12.7618  17
  -2 -12   3 201.175 11.9805   9
  -2 -12   3 216.274 13.9656   4
   2  12  -3 213.195 13.1313  16
  -2 -12  -3 210.494 15.5486  23
   2 -12   3 203.472 13.6243   2
   2 -12   3 198.181 13.4800  14
   2  12  -3 242.761 13.6101   3
  -2  12  -3 188.585 12.1732  13
  -2  12   3 202.794 13.3765  11
   2  12   4 44.0614 11.3936  19
  -2  12  -4 40.3659 9.93215  17
  -2 -12   4 42.5390 10.4034   4
   2 -12  -4 44.3535 12.6721  12
  -2 -12  -4 52.0485 14.7308  23
   2 -12   4 46.1509 11.0634   2
  -2  12   4 35.2699 9.51884  11
  -2 -13   0 617.283 21.9164   9
   2  13   0 622.048 20.3209  17
   2 -13   0 598.365 23.9753  14
  -2  13   0 594.106 21.9141  11
   2  13  -1-3.84827 8.56657  17
  -2 -13   1 9.88617 9.89731   9
  -2 -13   1-2.02592 8.28430   4
   2 -13   1-1.78687 12.2304  14
   2 -13  -1-2.87527 12.9263  14
  -2  13   1 3.61841 9.88342  11
  -2  13  -1 8.02955 8.28009  11
   2  13   1 7.04960 8.10139  11
  -2 -13   2 278.580 14.9891   9
   2  13  -2 265.651 13.7858  17
  -2 -13   2 257.436 14.1317   4
   2 -13   2 273.999 17.1686  14
  -2  13  -2 264.706 14.0091  13
  -2 -13  -2 274.557 16.5599  23
  -2  13   2 276.825 14.4499  11
   2  13   2 264.085 13.7176  11
   2  13   3 2.38252 10.3088  19
   2  13  -3-13.1508 9.64003  17
  -2 -13   3-1.18756 10.2097   4
   2 -13   3 13.0143 12.2936  14
  -2 -13  -3 9.27082 14.2997  23
   2  14  -1 262.094 14.3159  17
  -2 -14   1 247.339 14.7944   4
   2  14   2 60.8180 9.55320  11
  -3   0   0 1.83809 2.00815  20
   3   0   0 3.62493 1.96522   1
   3   0   0-1.27914 1.99755   5
  -3   0   0-0.23722 2.37694  10
   3   0   0-1.84789 2.32360   7
   3   0   1 893.917 22.1738   5
   3   0  -1 902.507 21.5165   1
  -3   0   1 934.458 22.4353  10
  -3   0  -1 925.333 22.5866  10
  -3   0  -1 880.319 22.3259  15
   3   0   1 891.142 22.1660   1
   3   0   1 832.224 22.1328   7
   3   0  -1 879.618 24.3568  22
  -3   0   1 799.663 22.2221  20
  -3   0   2 2.56415 3.21189  20
   3   0   2 1.64273 3.31818  19
  -3   0   2 0.91419 2.56208  10
  -3   0  -2-0.25183 2.54267  10
   3   0   2 3.05311 2.63508   5
   3   0   2 5.47731 2.86834   7
  -3   0  -2-1.18638 2.79342  25
  -3   0  -2-0.75178 2.53560  15
   3   0  -2-0.24156 4.76599  22
   3   0   2 0.87731 2.41357   1
  -3   0   3 2331.33 55.8683  10
   3   0   3 2340.36 56.5325  19
  -3   0  -3 2377.05 56.2452  10
  -3   0  -3 2264.98 56.2728  15
  -3   0  -3 2347.10 56.6726  25
  -3   0  -3 2495.89 56.8679  24
   3   0  -3 2380.02 59.1480  22
   3   0   3 2411.21 56.6212   1
  -3   0   3 2353.77 57.3693  20
  -3   0  -4-1.08368 3.73245  24
   3   0   4 6.21952 4.26904  19
  -3   0  -4 0.15293 3.47036  15
  -3   0  -4-1.58115 3.87277  25
   3   0   4-1.06757 3.80344   1
   3   0  -4-0.60489 6.67313  22
   3   0   5 98.8275 7.29639  19
  -3   0   5 115.124 9.35352  18
   3   0   5 104.581 6.91713   1
  -3   0  -5 113.416 7.02487  25
  -3   0  -5 120.331 7.32863  24
  -3   0   5 100.205 10.2148   6
   3   0  -5 113.086 10.0700  22
   3   0   6-5.33615 6.43606  19
  -3   0   6 8.70164 9.33284  18
  -3   0  -6 6.19253 5.94688  25
  -3   0   6 7.10667 9.28701   6
  -3   0   7 1213.72 35.7940  18
  -3   0   7 1168.29 34.8235   6
  -3   0  -7 1092.27 33.5658  21
  -3   1   0 1939.50 48.2963  20
  -3  -1   0 1979.76 48.7395  10
  -3   1   0 2010.43 48.4153  15
   3  -1   0 2105.03 48.8629  14
   3  -1   0 2094.35 48.5209   7
   3  -1   0 2100.96 48.0468   1
   3  -1   0 2082.52 50.3229  22
  -3  -1   0 2072.80 48.3209  24
   3  -1   1 1080.16 26.2200   1
   3   1   1 1031.28 26.1209   5
  -3  -1   1 1123.26 26.7066  10
  -3  -1  -1 1092.02 26.6677  10
   3   1   1 1079.15 26.4995   1
  -3   1   1 1063.05 26.0475  15
  -3   1  -1 1089.61 26.5358  15
   3   1   1 1050.96 26.4149   7
   3  -1   1 1042.35 26.4704   7
  -3   1  -1 1060.99 26.5200  25
  -3  -1  -1 1025.87 26.4599  24
  -3  -1   1 1071.04 25.8536  24
   3   1  -1 1089.98 28.5038  22
   3  -1  -1 1060.44 28.6792  22
  -3   1   1 1074.88 26.7910  20
  -3  -1   2 3069.09 72.3954  10
   3  -1   2 3092.80 71.9279  19
  -3  -1  -2 3102.66 72.5548  10
   3   1   2 3053.09 72.7939  19
   3  -1   2 3126.22 72.6631   5
  -3   1   2 3106.48 72.4434  10
   3   1   2 3128.26 72.2322   5
  -3  -1  -2 3099.72 72.7914  24
   3   1   2 2984.80 72.5880   1
  -3   1  -2 3121.15 72.6256  15
   3  -1   2 3115.64 72.6555   7
  -3  -1   2 3051.61 71.2582  24
   3   1  -2 3214.21 74.9990  22
   3  -1  -2 3045.07 74.9033  22
   3  -1   2 3179.90 72.4542   1
  -3   1   2 2963.24 73.1681  20
  -3   1  -3 309.520 9.74511  25
  -3  -1   3 293.261 9.31230  10
   3  -1   3 276.533 9.30941  19
   3   1   3 294.444 10.2882  19
  -3  -1  -3 280.016 9.32216  10
  -3   1   3 304.616 9.08104  10
   3  -1   3 302.940 9.73563   1
   3  -1   3 284.857 9.78453   7
  -3   1  -3 272.024 9.45620  15
   3   1   3 312.049 9.73981   1
   3   1   3 295.628 9.65560   7
   3   1  -3 296.060 12.2049  22
   3  -1  -3 294.699 12.2530  22
  -3  -1  -3 278.858 9.84920  24
  -3   1   3 288.555 10.6468  20
  -3  -1   4 771.783 20.6531  10
   3  -1   4 768.102 20.8651  19
   3   1   4 770.813 21.8943  19
  -3   1  -4 867.218 21.8161  24
  -3   1  -4 806.054 21.1719  15
   3  -1   4 789.317 21.4759   1
  -3   1  -4 821.211 21.5459  25
  -3  -1   4 758.072 23.3531   6
   3   1  -4 816.491 24.2649  22
  -3   1   4 746.113 22.7275  20
  -3  -1  -4 739.663 21.3646  24
   3  -1   5 613.694 18.8013  19
   3   1   5 597.987 19.3559  19
   3   1   5 662.010 19.3100   1
  -3  -1   5 588.205 20.7412  18
  -3   1  -5 691.143 19.3246  25
  -3   1  -5 733.854 19.6177  24
  -3  -1  -5 679.048 19.5922  24
  -3   1   5 658.889 22.1531   6
   3   1  -5 695.393 22.0772  22
   3   1   6 852.711 25.7502  19
  -3  -1   6 813.591 27.0485  18
  -3   1   6 887.550 28.1027  18
   3   1   6 866.418 24.5657   1
  -3   1  -6 874.431 24.9648  25
  -3   1   6 929.339 27.7824   6
   3   1   7 18.5166 8.11159  19
  -3  -1   7 33.4329 11.0854  18
  -3   1   7 33.4701 11.6182  18
  -3   1   7 64.7711 11.0448   6
  -3   1  -7 20.8813 9.31829  21
  -3  -1  -7 35.4210 11.9621  21
  -3  -2   0 1503.82 37.5366  10
  -3  -2   0 1526.25 37.0346  24
  -3   2   0 1591.74 37.2731  15
   3  -2   0 1560.61 38.0080  14
   3  -2   0 1582.04 37.1526   7
  -3   2   0 1518.45 36.9095  25
  -3   2   0 1501.20 37.0387  11
   3  -2   0 1585.26 39.0038  22
   3  -2   0 1554.32 36.5133   1
   3  -2   0 1540.86 37.2893   5
  -3   2   1 330.269 11.8198  20
   3   2   1 449.092 12.0062   1
   3   2   1 430.930 11.3586   5
   3  -2   1 428.283 12.1116   5
  -3  -2   1 423.135 12.0635  10
  -3  -2  -1 421.426 12.0491  10
   3  -2   1 415.364 11.4667   1
  -3   2   1 403.762 11.3633  15
  -3   2  -1 425.800 12.0081  15
  -3   2   1 416.753 12.0722  11
   3  -2   1 416.433 12.8206  14
   3  -2  -1 455.020 11.7236   7
   3  -2  -1 430.653 12.5451  14
   3   2   1 400.092 11.5796   7
   3  -2   1 434.699 11.9427   7
  -3   2  -1 393.126 11.6641  25
  -3  -2   1 422.893 11.2383  24
  -3  -2  -1 405.990 11.8658  24
  -3  -2   2 7282.83 164.551  10
   3  -2   2 6973.00 163.264  19
  -3  -2  -2 7061.86 164.399  10
   3   2   2 7406.38 164.620   1
   3  -2   2 7317.59 164.353   1
  -3   2   2 7166.18 163.432  15
   3   2  -2 7032.75 164.048   8
  -3   2  -2 7146.58 164.599  15
  -3   2  -2 6909.29 164.087  13
   3   2   2 6955.99 164.133   7
   3  -2   2 7111.63 164.543   7
  -3  -2   2 7380.59 163.096  24
  -3  -2  -2 7182.94 164.638  24
   3   2  -2 7062.63 166.338  22
   3  -2  -2 7237.75 166.921  22
  -3   2   2 6928.46 165.227  20
  -3  -2   3 80.7166 5.37153  10
   3  -2   3 61.6294 3.91266  19
  -3  -2  -3 77.0326 4.81721  10
   3   2   3 81.0926 6.01901  19
   3   2  -3 86.0057 5.18375   8
  -3   2  -3 86.7950 4.88422  15
   3   2   3 89.7502 5.05351   1
   3  -2   3 91.8852 4.79046   1
   3   2   3 80.4662 4.90492   7
  -3   2  -3 84.2421 5.01035  25
  -3  -2  -3 80.1650 5.17684  24
   3   2  -3 84.7603 7.15323  22
  -3   2   3 88.4681 6.02827  20
   3   2   4 1412.36 36.4988  19
  -3  -2  -4 1444.64 35.9416  24
  -3   2  -4 1449.62 35.4982  15
   3   2  -4 1442.89 35.7749   8
  -3   2  -4 1449.94 35.7076  25
  -3  -2   4 1454.55 37.4466   6
   3  -2   4 1438.59 35.3721   1
  -3  -2  -4 1340.03 36.0240  23
   3   2  -4 1396.91 37.6903  22
  -3   2   4 1419.89 36.9568  20
   3   2   5 380.421 13.4339   1
   3   2   5 376.873 14.3626  19
  -3   2  -5 423.895 13.8945  25
  -3  -2   5 401.431 15.4657  18
   3   2  -5 392.463 14.0136   8
  -3   2  -5 430.156 13.8037  24
  -3   2   5 417.674 17.0360   6
  -3  -2   5 417.150 15.9258   6
  -3   2   5 385.352 15.0554  20
  -3   2  -6 1850.37 46.1628  25
   3   2   6 1814.80 46.9212  19
  -3  -2   6 1753.87 47.9160  18
  -3   2   6 1745.86 48.5958  18
   3   2   6 1789.47 45.5260   1
   3   2  -6 1857.79 46.3831   8
  -3   2   6 1778.72 48.2732   6
  -3  -2   6 1820.41 47.6010   6
  -3   2  -6 1682.39 46.5239  21
   3   2   7 6.26346 8.80884  19
  -3   2   7-4.51630 11.5955  18
   3   2   7 14.1358 7.13950   1
  -3   2   7 13.6238 10.0674   6
  -3  -2   7 14.7677 9.98408   6
  -3  -2  -7 7.39431 9.15146  21
  -3   2  -7 1.12846 6.98401  25
  -3  -3   0 2276.07 54.7030  10
  -3  -3   0 2232.71 54.2004  24
  -3   3   0 2398.16 54.3655  15
   3  -3   0 2427.12 55.6605  14
   3  -3   0 2397.44 54.1318   7
  -3   3   0 2304.57 54.3513  11
   3  -3   0 2368.53 55.9352  22
   3  -3   0 2341.89 54.4438   5
   3  -3   1 2742.64 67.1073   2
   3   3   1 2908.67 65.4040   5
  -3  -3   1 2830.86 66.7539  10
   3  -3   1 3060.27 66.6465   5
  -3  -3  -1 2853.57 66.6482  10
   3  -3   1 2858.88 64.3613  19
   3   3   1 2498.35 65.4268  16
   3   3  -1 2812.88 65.2810   8
  -3   3   1 2726.39 66.6244  11
  -3   3   1 2926.56 65.9850  15
   3  -3   1 2822.98 67.5972  14
   3   3   1 2745.29 65.9318   7
   3  -3  -1 2872.86 65.8037   7
   3  -3  -1 2726.41 67.3062  14
   3  -3   1 2740.55 66.1817   7
  -3   3   1 2814.51 65.2304  25
  -3   3  -1 2848.33 66.0342  25
   3  -3   1 2774.16 65.6633   1
  -3  -3  -1 2751.24 66.4794  24
   3  -3  -1 2982.89 68.6103  22
  -3   3   2 7.03288 3.71878  20
  -3  -3   2 9.70425 3.93590  10
  -3  -3  -2 9.72613 3.52479  10
   3  -3   2 10.2979 3.22342   5
   3   3   2 11.4834 2.10497  16
  -3   3   2 9.08425 2.34891  15
  -3   3  -2 9.39236 2.87569  15
   3   3  -2 11.5625 3.04080   8
   3  -3   2 5.70963 4.24224   2
  -3   3  -2 23.4266 4.33817  13
  -3   3   2 4.67008 3.52305  11
  -3   3  -2 12.6714 3.12641  25
  -3  -3  -2 6.99188 3.42087  24
   3   3   2 13.4979 3.16551   7
   3  -3   2 11.5195 3.25503   7
   3  -3   2 9.53794 2.63644   1
   3   3   2 12.6748 3.26284   1
  -3  -3  -3 2025.25 51.4434  10
   3  -3   3 2074.68 53.5024   2
   3   3   3 2136.97 52.6466  19
   3   3   3 2079.42 51.9050   1
   3   3  -3 2119.28 51.5217   8
   3   3   3 2058.75 51.1627   7
  -3   3  -3 2152.74 51.8686  25
   3   3  -3 2087.78 53.5969  22
  -3   3   3 2131.99 52.8953  20
   3  -3   4 1562.52 43.9946   2
   3   3   4 1637.83 43.3228  19
  -3  -3   4 1733.91 43.1960   4
   3   3  -4 1715.30 42.3316   8
  -3   3  -4 1782.60 42.4779  15
   3   3   4 1668.27 42.1248   1
   3  -3  -4 1821.75 45.6146  12
  -3   3  -4 1743.02 42.5442  25
  -3  -3   4 1724.20 43.6859   6
  -3  -3  -4 1573.34 42.8557  23
   3   3  -4 1685.65 44.1171  22
  -3   3   4 1710.12 43.6605  20
  -3  -3   4 1696.57 42.0908  10
   3  -3   5 1184.54 33.3838   2
   3   3   5 1034.04 31.3007  19
   3   3  -5 1031.14 30.3526   8
  -3   3  -5 1247.94 30.4505  15
   3  -3  -5 1154.03 34.3092  12
  -3   3  -5 1262.03 30.9704  25
  -3   3   5 1213.76 33.8228   6
  -3  -3  -5 1050.81 31.2724  23
   3   3   5 1215.52 30.5496   1
  -3  -3   5 1122.60 31.8575   6
  -3   3   5 1095.37 31.9455  20
  -3   3  -6 19.8916 7.27652  25
   3   3   6 12.4388 8.17575  19
   3   3  -6 29.2370 7.23772   8
   3  -3  -6 14.4359 11.0057  12
   3   3   6 23.5554 5.86711   1
  -3   3   6 12.7664 10.2229   6
  -3  -3   6 23.3370 9.12397   6
   3   3   7 589.942 21.5105  19
  -3   3   7 632.185 24.5717  18
   3   3  -7 602.143 20.1381   8
   3   3   7 584.970 18.7627   1
  -3   3  -7 537.042 20.2831  25
  -3   3   7 613.329 22.8655   6
  -3  -3  -7 506.208 20.9390  21
   3  -4   0 5394.45 121.998   5
  -3  -4   0 5066.47 122.495  10
   3   4   0 5409.85 121.883  16
   3   4   0 5278.87 120.063   8
   3  -4   0 5284.54 123.357  14
   3  -4   0 5459.28 121.416   7
  -3   4   0 5008.12 121.038  25
  -3   4   0 5403.18 122.163  11
   3  -4   0 4964.10 123.061  22
  -3  -4   1 1719.67 46.3473  10
  -3  -4  -1 1893.30 46.3629  10
   3   4   1 1978.83 44.5292   5
   3  -4   1 2054.83 46.1798   5
   3  -4   1 1916.41 46.6327   2
   3   4   1 1988.90 45.2179  16
   3   4  -1 1639.00 44.6047   8
   3  -4   1 1659.37 46.9006  14
   3   4   1 1971.22 45.4699   7
   3  -4  -1 2034.76 47.4215  14
   3  -4  -1 1960.18 45.0910   7
   3  -4   1 1884.97 45.6340   7
  -3   4   1 1905.58 44.5745  25
  -3   4  -1 1870.96 45.4398  25
  -3   4   1 1971.39 46.5239  11
   3  -4   1 1958.84 46.4516  22
   3  -4  -1 1993.09 48.0162  22
  -3  -4   2 679.961 19.4984  10
  -3  -4  -2 681.691 18.8935  10
   3  -4   2 668.920 19.8062   2
   3   4   2 716.883 17.2705  16
   3   4  -2 681.479 18.0530   8
   3   4   2 671.934 17.8647   7
  -3   4  -2 723.012 18.9173  13
  -3   4   2 629.335 19.0850  11
  -3   4  -2 669.195 18.3373  25
  -3  -4  -3 1967.35 52.7414  10
   3   4   3 2203.84 54.2118  19
   3  -4   3 2265.74 54.8101   2
   3   4  -3 2337.15 53.0082   8
  -3   4   3 2160.00 54.0759  11
  -3   4  -3 2399.71 53.1367  13
   3   4   3 2313.94 52.1883   7
   3  -4  -3 2160.55 55.8671  12
  -3   4  -3 1831.99 52.4555  25
  -3  -4   3 2143.89 53.7268   6
  -3   4   3 2217.17 54.2384  20
  -3  -4   3 2252.93 53.5839  10
   3   4   4 2249.48 57.7699  19
   3  -4   4 2279.81 58.5331   2
  -3  -4   4 2215.91 57.3891   4
   3   4  -4 2273.53 56.4878   8
   3   4   4 2307.53 56.4515   1
  -3   4  -4 2554.84 56.8473  15
   3  -4  -4 2388.82 60.0237  12
  -3   4  -4 2441.75 56.8591  25
  -3  -4  -4 2185.65 57.2145  23
  -3  -4   4 2344.68 57.4666   6
  -3  -4   4 2256.77 56.4052  10
  -3   4   4 2263.21 57.8593  20
   3   4   5 552.040 19.9395  19
   3  -4   5 583.074 20.9148   2
   3   4  -5 577.158 18.6778   8
  -3   4  -5 655.197 18.7053  15
  -3   4  -5 637.742 19.0733  25
   3  -4  -5 661.249 22.5509  12
   3   4   5 604.424 18.3185   1
  -3   4   5 599.162 21.6266   6
  -3  -4  -5 548.185 19.7751  23
  -3  -4   5 623.994 19.7060   6
   3   4   6 574.514 20.3917  19
   3   4  -6 610.858 19.8129   8
   3  -4  -6 602.060 23.8508  12
  -3   4  -6 549.583 20.0365  25
  -3   4   6 597.669 22.6300   6
  -3  -4   6 608.128 20.7537   6
  -3   4   6 647.395 21.7947  20
   3   4   6 600.464 18.7599   1
   3   4   7 950.462 33.6636  19
  -3   4   7 972.898 35.3787  18
   3   4   7 976.930 31.6764   1
   3   4  -7 1043.23 32.8945   8
   3  -4  -7 1032.23 36.9207  12
  -3   4   7 1022.46 34.6345   6
  -3  -4  -7 959.221 34.3046  21
  -3  -5   0 722.257 20.3859  10
   3  -5   0 689.009 19.0766   5
   3   5   0 737.989 19.2744  16
   3  -5   0 703.536 21.0460  14
   3  -5   0 691.822 18.4025   7
  -3   5   0 680.537 18.1817  25
  -3   5   0 731.870 19.5623  11
   3  -5   0 713.709 20.5095  22
   3   5   0 729.485 17.4513   5
  -3  -5  -1 86.9573 6.34534  10
   3  -5   1 78.0359 5.02415   5
   3  -5   1 81.5003 5.57596  22
   3  -5   1 78.1366 5.86331   2
  -3   5   1 71.5672 3.58727  25
   3   5   1 86.5943 4.90608  16
   3   5  -1 83.5209 4.18971   8
   3  -5   1 71.7977 6.68419  14
   3   5   1 75.0772 4.58122   7
   3  -5  -1 80.0184 6.79927  14
   3  -5   1 74.9772 4.81565   7
  -3   5  -1 65.1107 4.28408  25
  -3   5   1 85.0642 5.65604  11
   3  -5  -1 81.8819 4.81772   5
  -3  -5  -2 2748.27 67.2761  10
   3  -5   2 2830.57 67.7751   2
   3   5   2 2929.06 65.3513  16
   3   5  -2 2869.77 65.9776   8
   3  -5   2 2853.81 68.5206  14
  -3   5  -2 2715.96 66.3079  25
   3   5   2 2783.75 65.5541   7
  -3   5  -2 2714.30 66.7526  13
  -3  -5   2 2899.32 67.6948  10
  -3  -5  -3 313.018 12.9909  10
   3   5   3 276.515 13.1516  19
   3  -5   3 310.526 13.5596   2
   3   5  -3 301.454 11.8915   8
  -3   5  -3 319.500 12.5639  13
   3   5   3 290.640 11.0274   7
  -3  -5   3 303.983 12.6580   6
  -3  -5   3 322.192 13.4548  10
   3   5   4 335.070 13.8837  19
   3  -5   4 323.059 14.0412   2
  -3  -5   4 329.836 13.5436   4
   3   5   4 365.727 12.1726   1
   3   5  -4 346.225 12.4317   8
   3  -5  -4 251.376 15.3358  12
  -3   5  -4 396.731 12.5710  25
  -3   5   4 279.503 13.2723  11
  -3  -5  -4 345.818 13.7019  23
  -3  -5   4 358.250 13.2118   6
  -3  -5   4 333.098 13.1829  10
  -3   5   4 351.982 13.6794  20
   3  -5  -5-9.68329 9.16262  12
   3   5   5-11.2440 8.26934  19
  -3   5  -5-4.49018 6.17510  25
  -3   5  -5 3.91355 5.90395  15
   3   5  -5-1.21799 6.50709   8
  -3  -5   5 2.68706 6.93508   4
   3   5   5 1.33514 5.13086   1
   3  -5   5-0.73910 8.14643   2
  -3  -5  -5-18.4497 9.33147  23
  -3   5   5 8.80954 10.1490   6
  -3  -5   5 3.30504 7.06578   6
   3   5   6 786.132 26.0791  19
   3   5  -6 852.476 25.0191   8
   3  -5  -6 879.932 29.5144  12
  -3   5  -6 790.391 25.7341  25
  -3  -5  -6 788.091 26.1400  23
  -3   5   6 887.692 28.1052   6
   3   5   6 812.070 23.9217   1
  -3   5   6 841.841 26.8518  20
   3  -5   7 148.784 14.9654   2
   3   5   7 159.882 12.2356  19
   3  -5  -7 129.636 14.7648  12
   3   5   7 130.204 9.96222   1
   3   5  -7 148.028 10.7978   8
  -3   5  -7 131.121 11.4690  25
  -3   5   7 160.091 13.4243   6
  -3  -6   0-2.64191 5.36980  10
   3  -6   0-1.09291 3.49729   5
   3   6   0-0.32510 4.04876  16
   3  -6   0 1.04956 5.86205  14
   3  -6   0-0.61570 5.25111  22
  -3   6   0 2.02573 4.23911  11
  -3  -6  -1 1753.69 44.3411  10
   3  -6   1 1746.52 43.2655   5
   3   6   1 1742.87 42.9789  16
   3   6  -1 1761.75 43.7916  16
   3  -6   1 1773.45 45.2891  14
   3   6   1 1775.89 42.3561   7
   3  -6  -1 1746.30 45.4293  14
  -3   6   1 1741.22 41.6458  25
  -3   6   1 1844.56 44.2256  11
   3  -6   1 1692.15 43.1908  22
   3  -6  -1 1795.89 43.0339   5
  -3  -6   2 27.8959 6.73257  10
  -3  -6  -2 25.9192 6.52366  10
   3   6  -2 28.0028 5.37526  16
   3   6  -2 25.8180 4.28562   8
   3  -6   2 21.6984 6.21511  14
  -3   6  -2 27.9648 5.58828  13
   3  -6  -2 9.12931 6.65696  12
   3   6   2 33.4130 3.95507   7
   3  -6   2 25.6619 5.89311   2
  -3  -6   2 27.4673 5.36580   6
  -3   6   2 19.1605 5.14789  11
  -3  -6  -3 428.651 15.2798  10
   3   6   3 433.060 14.2646   1
   3  -6   3 461.138 16.1754   2
  -3  -6   3 469.718 15.6789   4
   3   6  -3 467.278 14.2488   8
  -3   6  -3 474.106 15.0801  13
   3   6   3 450.442 12.8846   7
  -3   6  -3 477.228 14.5422  25
  -3  -6  -3 492.803 16.4420  23
  -3  -6   3 450.522 14.1810   6
  -3  -6   3 460.422 16.0544  10
  -3   6   3 438.483 15.6709  11
  -3   6   4 0.60341 6.55399  20
   3   6   4 0.63385 4.93578   1
   3   6   4 7.80879 7.50194  19
   3   6  -4-2.35280 5.50942   8
  -3  -6   4 5.55215 6.61988   4
  -3   6  -4 4.87597 6.31589  13
   3  -6   4-0.32733 7.07738   2
  -3   6   4 3.26658 5.99650  11
  -3   6  -4 0.72440 4.96966  25
  -3  -6  -4 0.86583 7.35479  23
  -3  -6   4 3.21816 5.89652   6
   3   6   5 1638.36 45.5063  19
   3  -6   5 1732.89 46.5510   2
  -3  -6   5 1660.95 45.1048   4
   3   6  -5 1652.36 43.8540   8
   3   6   5 1632.91 43.0004   1
   3  -6  -5 1742.11 47.7329  12
  -3   6   5 1739.31 46.3605   6
  -3  -6  -5 1613.69 45.3097  23
  -3   6   5 1603.29 45.2519  20
  -3   6   6 6.96793 9.46616  20
   3   6   6 2.99163 9.70539  19
  -3   6  -6 20.3121 8.50948  25
   3   6  -6 10.6174 8.02170   8
  -3  -6   6 10.8939 8.56818   4
   3  -6   6 8.87411 10.5173   2
  -3  -6  -6 15.3549 9.81104  23
   3   6   6 9.40522 6.23952   1
  -3  -6  -6 9.06556 10.4361  21
   3  -6  -6 24.2245 12.2113  12
   3  -7   0 4569.57 107.044   5
   3   7   0 4629.89 107.525  16
   3  -7   0 4468.24 109.537  14
  -3   7   0 4790.80 108.150  11
   3  -7   0 4511.63 107.966  22
  -3  -7   0 4421.43 108.634  10
  -3  -7  -1 27.6596 6.84810  10
   3  -7  -1 26.4920 4.48166   5
   3  -7   1 25.8521 4.93893   5
   3   7   1 26.1032 4.95098  16
   3   7  -1 34.6547 5.67223  16
   3  -7   1 22.1762 6.61993  14
   3  -7  -1 18.3269 6.62491  14
   3   7   1 28.1437 3.99313   7
  -3   7   1 22.4399 5.74635  11
   3  -7  -2 68.5344 8.55578  12
  -3  -7   2 49.8961 8.16205  10
  -3  -7  -2 55.2276 7.85177  10
   3   7  -2 50.7316 6.17719  16
   3  -7   2 61.2953 7.81041  14
   3   7   2 45.9976 4.27292   7
  -3   7  -2 58.9255 6.29820  13
   3  -7   2 52.3009 6.79814   2
  -3   7   2 42.9361 6.67360  11
   3  -7  -2 57.1632 5.09337   5
   3   7   3 105.977 9.07110  19
   3  -7   3 99.2404 8.83244   2
  -3  -7   3 111.873 8.52904   4
   3   7  -3 106.061 7.11626   8
  -3   7  -3 96.1339 7.82535  13
  -3   7   3 97.4278 8.02098  11
  -3  -7  -3 116.998 8.93214  23
  -3  -7   3 87.3499 9.58248  10
  -3  -7  -3 93.4091 9.01311  10
   3   7   4 2416.56 60.0250   1
   3  -7   4 2478.39 62.7041   2
  -3  -7   4 2476.83 61.9655   4
   3   7  -4 2444.20 60.2003   8
   3   7  -4 2345.33 61.0556  16
  -3   7  -4 2312.74 60.5664  13
   3  -7  -4 2588.38 64.2122  12
  -3   7  -4 2605.16 61.2270  25
  -3   7   4 2525.24 62.0331  11
  -3  -7  -4 2320.63 61.8717  23
  -3   7   5 2.14978 8.39000  20
   3   7   5-3.36687 6.05753   1
   3   7  -5 0.91341 7.19785  16
   3   7  -5-1.85823 7.30183   8
  -3  -7   5 7.67700 8.85622   4
   3  -7   5-5.18801 9.78392   2
  -3   7  -5 5.39586 7.27909  25
  -3  -7  -5 1.81927 10.1180  23
  -3   7   6 3.20057 9.50391  20
   3   7   6 9.88002 6.54037   1
   3   7   6 5.95227 10.5357  19
   3   7  -6 7.63328 8.87775  16
   3   7  -6 4.57401 7.88208   8
  -3  -7   6 6.61625 9.97940   4
   3  -7   6 9.75360 11.4462   2
   3  -7  -6-4.65620 13.5369  12
  -3   7  -6 12.8376 7.56267  25
  -3  -7  -6 12.5036 11.5626  23
  -3  -7  -6 6.36265 9.30394  21
   3  -8   0 3835.37 86.5169   5
   3   8   0 3513.89 86.9262  16
   3  -8   0 3486.60 89.1498  14
  -3   8   0 3504.57 87.3515  11
   3  -8   0 3786.51 87.3321  22
  -3  -8   0 3670.91 88.4156  10
   3  -8   1 97.7777 6.71813   5
  -3  -8  -1 70.1219 8.59266  10
   3   8   1 76.4992 6.79226  16
   3   8  -1 71.5029 7.01998  16
   3  -8   1 77.9131 8.67935  14
   3   8   1 87.7609 5.14128   7
   3  -8  -1 77.8243 9.33153  14
  -3   8   1 83.4339 7.12540  11
   3  -8   2 601.841 19.2502   2
   3   8  -2 583.019 18.6058  16
   3  -8   2 617.401 20.2590  14
  -3   8  -2 596.675 18.6621  13
   3  -8  -2 644.377 20.8682  12
  -3  -8   2 597.107 20.3134  10
  -3  -8  -2 544.646 19.5355  10
   3   8   3 0.94973 7.84215  19
  -3  -8   3 2.20356 7.18180   4
  -3   8  -3 4.05557 7.06256  13
   3  -8  -3 7.49200 8.81544  12
  -3  -8  -3 21.2198 8.82137  23
  -3   8   3 10.2761 6.60072  11
   3  -8   3 9.37971 8.02347   2
   3   8   4 1989.95 51.2586  19
   3   8   4 1905.60 48.8223   1
   3  -8   4 2003.38 51.7301   2
  -3  -8   4 1999.84 51.1758   4
   3   8  -4 1945.17 49.1724   8
   3   8  -4 1736.22 49.5243  16
  -3   8   4 1982.77 50.9465  11
  -3   8  -4 1925.29 49.6866  13
   3  -8  -4 1989.65 53.0008  12
  -3  -8  -4 1942.67 51.5669  23
  -3   8   5 95.8546 10.9703  20
   3  -8  -5 85.7257 12.6191  12
   3   8   5 83.9673 8.22329   1
   3   8  -5 87.4073 8.75916   8
   3   8  -5 89.1135 9.64619  16
  -3  -8   5 89.0266 9.98942   4
  -3   8  -5 92.7792 10.1613  13
   3  -8   5 106.104 12.0694   2
  -3   8  -5 111.334 10.0672  25
  -3  -8  -5 89.9953 12.6993  23
   3   8  -6 556.170 20.0515   8
  -3  -8   6 544.883 21.6156   4
   3   8   6 554.069 18.3488   1
  -3  -8  -6 515.832 21.4221  21
  -3   8   6 561.176 21.4019  20
   3   9   0 438.870 14.8904  16
   3  -9   0 367.296 16.8789  14
  -3   9   0 432.998 15.3722  11
  -3  -9   0 402.345 16.3516  10
  -3  -9  -1 36.3790 9.20768  10
   3   9   1 48.8115 7.06366  16
   3   9  -1 39.5307 7.38734  16
   3  -9   1 32.5328 8.70892  14
   3  -9  -1 51.8531 9.15098  14
  -3   9   1 54.5582 7.71581  11
   3   9   2 2113.37 56.1155  19
   3   9  -2 2158.45 55.1523  16
   3  -9   2 2203.02 57.1117  14
  -3   9  -2 2111.06 55.1313  13
   3  -9  -2 2267.29 57.1286  12
  -3   9   2 2227.75 56.0924  11
  -3  -9  -2 2329.42 56.2943  23
  -3  -9  -2 2128.76 56.0098  10
   3   9   3 26.0986 9.25525  19
  -3  -9   3 32.0087 8.27285   4
  -3   9  -3 22.4823 7.70769  13
   3  -9  -3 23.5881 9.79044  12
   3  -9   3 34.6897 8.42699   2
  -3   9   3 24.0431 7.61020  11
  -3   9   4 186.686 12.6808  20
   3   9   4 190.733 10.2239   1
   3   9   4 198.979 12.8217  19
   3  -9   4 193.417 13.3231   2
  -3  -9   4 180.396 12.2626   4
   3   9  -4 199.014 10.6363   8
   3   9  -4 185.485 11.8302  16
  -3   9   4 198.641 12.1227  11
  -3   9  -4 195.998 11.4334  13
   3  -9  -4 179.309 14.1384  12
  -3  -9  -4 198.106 14.4163  23
  -3   9   5 22.5790 9.11592  20
   3   9   5 28.6935 9.78154  19
   3   9   5 27.8888 6.76537   1
   3   9  -5 26.8199 9.56630  16
   3   9  -5 29.6803 7.96620   8
  -3  -9   5 29.1032 10.5431   4
  -3   9  -5 30.2048 9.31609  13
   3  -9  -5 18.3873 11.7929  12
   3  -9   5 40.6089 11.5193   2
  -3  -9  -5 24.9851 12.3541  23
   3  10   0 2.84942 6.79483  16
   3 -10   0-5.94883 9.31645  14
  -3  10   0 5.21424 7.52053  11
  -3 -10   1 1798.19 44.9458   9
   3  10  -1 1741.93 44.5577  16
   3 -10   1 1779.08 46.9248  14
   3 -10  -1 1752.27 47.2283  14
  -3 -10  -1 1905.64 45.6111  23
   3  10   2 437.502 18.2695  19
  -3 -10   2 460.682 16.9909   9
   3  10  -2 430.864 17.0138  16
   3 -10   2 445.200 19.0031  14
   3 -10  -2 457.114 19.4013  14
  -3  10  -2 459.052 16.8171  13
   3 -10  -2 469.366 18.5518  12
  -3  10   2 461.254 17.6370  11
  -3 -10  -2 436.786 17.8707  23
   3  10   3 975.300 30.3049  19
  -3 -10   3 1041.79 30.3181   4
   3 -10   3 910.695 29.7480   2
  -3  10  -3 940.565 28.9470  13
   3 -10  -3 1010.39 31.5159  12
  -3  10   3 997.218 29.9898  11
  -3 -10  -3 1018.99 31.0506  23
   3  10   4 13.0693 6.69881   1
   3  10   4 23.8682 10.7615  19
   3  10  -4 3.35468 8.24345  16
   3  10  -4 12.5081 8.01274   8
  -3 -10   4 6.36002 10.1146   4
  -3  10  -4 17.6094 8.75680  13
   3 -10  -4 44.6611 11.4079  12
   3 -10   4 14.2994 11.0017   2
  -3  10   4 15.5643 9.34832  11
   3  10   5 1412.27 37.8783   1
   3  10  -5 1406.72 38.9909   8
   3 -11   0 900.957 29.6439  14
  -3 -11   0 937.072 27.5689  23
  -3  11   0 960.940 27.6446  11
  -3 -11   1 34.0563 8.87827   9
   3  11  -1 21.2401 8.29683  16
   3 -11   1 39.9087 10.3185  14
   3 -11  -1 42.2884 12.3137  14
  -3 -11  -1 39.2113 9.91281  23
  -3  11   1 29.9941 8.47429  11
   3  11   2 183.197 13.6655  19
  -3 -11   2 202.519 12.8949   4
  -3 -11   2 181.086 11.2518   9
   3  11  -2 197.224 12.4066  16
   3 -11   2 176.316 13.5917  14
   3 -11  -2 181.981 14.6529  14
  -3  11  -2 180.536 11.9644  13
  -3  11   2 192.595 12.4333  11
  -3 -11  -2 182.974 13.1367  23
   3  11   3 130.516 12.2260  19
  -3  11  -3 139.804 11.2519  13
   3 -11  -3 149.552 13.1096  12
  -3  11   3 125.328 11.4954  11
  -3 -11  -3 143.808 13.7944  23
   3  11   4 545.339 18.8797   1
   3 -11   4 566.055 22.5927   2
  -3  11  -4 552.711 20.5000  13
   3 -11  -4 568.882 23.7539  12
  -3 -11  -4 506.648 22.9591  23
   3  12   0 292.965 13.7397  16
   3 -12   0 262.884 17.6888  14
  -3  12   0 263.016 15.2180  11
  -3 -12   1 657.684 22.4633   9
   3  12  -1 608.143 21.3843  16
   3 -12   1 658.546 24.7969  14
   3 -12  -1 607.013 24.5332  14
  -3 -12  -1 656.863 22.6007  23
  -3  12   1 585.315 21.8188  11
   3  12   2 79.0689 11.5276  19
  -3 -12   2 77.7868 10.9989   9
   3  12  -2 87.4937 10.8665  16
  -3 -12   2 90.8863 11.4267   4
   3 -12  -2 94.8053 14.4213  14
  -3  12  -2 86.1362 11.0919  13
  -3 -12  -2 110.602 13.1900  23
  -3  12   2 73.7106 10.0973  11
  -3 -12  -3 1073.42 34.1689  23
  -3  13   0 19.5955 9.56108  11
   3  13   1 126.217 13.9832  19
  -3 -13   1 136.017 13.0282   4
   3  13  -1 131.739 11.4669  16
   3  13  -2 1259.31 35.5357  17
  -3 -13  -2 1217.51 38.0305  23
   4   0   0 9425.98 204.165   1
   4   0   0 9191.05 204.671   7
   4   0   0 9314.99 204.528   5
   4   0   1-1.71622 3.70081   5
  -4   0   1 2.51250 3.78795  10
  -4   0  -1-0.34320 3.28090  10
   4   0   1 1.51168 3.12912   1
   4   0   1 0.75530 3.73577   7
   4   0  -1-0.85431 5.69413  22
  -4   0   2 59.9825 5.21183  10
   4   0   2 62.7012 5.15191   5
   4   0   2 53.4305 4.95920  19
  -4   0  -2 65.7066 5.34432  10
   4   0   2 62.7715 5.05722   7
   4   0   2 56.7503 4.65891   1
   4   0  -2 61.6680 7.79263  22
  -4   0   2 71.3205 5.96195  20
   4   0   3-3.23462 4.75090  19
   4   0   3-2.37241 3.97531   1
  -4   0   3 4.16323 4.24940  10
  -4   0  -3 2.54293 4.32428  10
  -4   0  -3-1.02166 4.23131  24
   4   0  -3 3.05065 7.28736  22
   4   0   4 4930.92 116.193   1
  -4   0  -4 5004.22 116.715  24
   4   0  -4 4816.68 119.474  22
   4   0   5-0.48670 5.93105   1
  -4   0  -5 6.29319 6.42860  24
   4   0  -5-7.82587 10.1569  22
  -4   0   6 0.40696 10.2239  18
   4   0   6 2.43670 6.07276   1
  -4   0  -6 17.5512 7.67519  24
   4   0  -6 19.3556 11.9212  22
  -4  -1   0 151.936 6.68940  10
   4   1   0 140.672 6.07385   1
  -4   1   0 133.784 6.30160  15
   4   1   0 150.586 6.55272   7
   4  -1   0 144.654 6.39447   7
  -4  -1   0 143.361 6.36859  24
   4   1   0 146.132 6.21370   5
   4  -1   0 143.806 6.37493   5
   4   1   1 154.239 6.67900   5
   4  -1   1 155.074 6.91253   5
  -4  -1   1 156.612 7.16051  10
  -4  -1  -1 159.848 7.31579  10
  -4   1   1 177.196 7.28214  10
   4   1   1 163.182 6.77066   1
   4  -1  -1 161.295 6.85061   7
   4   1   1 151.741 6.87460   7
   4  -1   1 158.655 6.84704   7
  -4  -1   1 163.450 6.35053  24
  -4  -1  -1 162.596 7.17630  24
   4  -1   1 154.982 6.34366   1
  -4   1   1 156.680 7.40041  20
  -4  -1   2 1539.27 38.0193  10
  -4  -1  -2 1502.74 37.9974  10
   4  -1   2 1614.10 37.9539   5
   4   1   2 1545.10 37.9433  19
   4   1   2 1579.19 37.4962   5
  -4   1   2 1427.29 37.6253  10
  -4   1  -2 1535.88 37.8607  15
   4   1   2 1487.46 37.7061   1
   4  -1   2 1418.63 37.5957   7
  -4   1  -2 1516.46 37.9235  25
  -4  -1   2 1547.13 36.3571  24
   4   1  -2 1421.16 40.4541  22
   4  -1  -2 1609.70 40.9564  22
   4  -1   2 1537.18 37.5296   1
  -4   1   2 1404.63 38.3005  20
  -4  -1   3 349.179 11.4453  10
  -4  -1  -3 326.447 11.2156  10
   4   1   3 276.936 11.1921  19
  -4   1   3 306.824 10.8003  10
   4  -1   3 333.297 11.1522   1
  -4   1  -3 346.396 11.5519  10
  -4   1  -3 323.012 11.3907  15
   4   1   3 320.375 11.1852   7
   4  -1   3 331.612 11.4732   7
   4   1   3 317.707 11.1891   1
  -4  -1  -3 317.667 11.6475  24
   4   1  -3 327.055 14.2933  22
   4  -1  -3 330.797 14.9034  22
  -4   1   3 303.643 12.2503  20
  -4   1  -4 208.575 9.81575  25
   4   1   4 217.017 10.1846  19
  -4   1  -4 220.677 9.52083  15
   4  -1   4 200.484 9.19947   1
  -4  -1  -4 205.215 9.67865  24
  -4   1  -4 236.883 10.1945  24
   4   1  -4 204.322 12.6298  22
   4  -1  -4 238.149 13.6138  22
   4   1   4 222.832 9.46460   1
   4  -1   5 43.3084 6.11295   1
  -4   1  -5 52.5539 7.10579  25
  -4  -1  -5 59.5075 7.73471  24
  -4   1  -5 35.5729 7.45531  24
   4   1  -5 45.1324 10.5421  22
  -4   1   5 45.3707 11.5268   6
   4  -1  -5 58.6542 11.2120  22
  -4  -1   5 24.6151 11.5782   6
  -4   1   6 422.091 19.0856  18
   4   1   6 386.756 14.6981   1
  -4   1  -6 325.387 15.6591  25
  -4  -1  -6 340.351 15.6861  24
  -4   1  -6 419.457 15.6293  24
  -4   1   6 439.491 20.0749   6
  -4  -1   6 441.732 18.8589   6
   4  -1  -6 425.911 19.2599  22
   4   2   0 12.7005 3.34755   5
  -4  -2   0 15.4438 3.97150  10
  -4   2   0 8.56747 3.31232  15
   4   2   0 16.0160 3.83706   7
   4  -2   0 10.7696 3.64184   7
  -4  -2   0 12.0278 3.59097  24
   4   2   0 9.50255 3.45445   1
   4   2   1 119.339 5.62316   5
  -4  -2   1 107.369 6.23288  10
   4  -2   1 120.647 5.39435   1
  -4  -2  -1 125.080 6.62506  10
   4   2   1 111.724 5.91410   1
  -4   2   1 113.808 5.65952  15
   4  -2  -1 126.527 6.09708   7
   4  -2   1 126.320 6.30652   7
  -4  -2   1 117.885 5.45482  24
  -4  -2  -1 119.961 6.13976  24
   4  -2  -1 116.679 8.84143  22
  -4   2  -1 108.488 5.95675  25
  -4   2   1 135.937 7.02830  20
  -4  -2   2 1744.74 42.5526  10
  -4  -2  -2 1606.62 42.1805  10
   4  -2   2 1784.85 42.5249   5
   4   2   2 1776.58 41.5839   5
   4  -2   2 1491.82 41.4315   1
   4   2   2 1814.12 42.4322   1
  -4   2  -2 1780.51 42.4997  15
   4   2   2 1751.46 42.0554   7
   4  -2   2 1803.09 42.4202   7
  -4   2  -2 1732.86 42.4607  25
  -4  -2  -2 1511.31 42.1715  24
  -4   2   2 1766.87 43.2333  20
  -4  -2   3 480.073 14.8151  10
   4  -2   3 451.758 14.6961   7
  -4  -2  -3 438.589 14.3861  10
   4   2   3 461.678 15.2123  19
  -4   2   3 471.792 14.0636  10
  -4   2  -3 488.785 14.5435  15
   4  -2   3 458.344 14.1187   1
   4   2   3 467.979 14.5220   1
   4   2   3 453.569 14.1814   7
  -4  -2  -3 455.967 14.8864  24
   4   2  -3 504.531 17.5148  22
   4  -2  -3 467.368 17.8521  22
  -4   2   3 408.553 15.3160  20
  -4   2   4 29.3437 6.76470  20
   4   2   4 16.2609 6.78293  19
  -4   2  -4 27.8904 5.63892  15
  -4   2  -4 27.1949 5.79367  25
  -4  -2  -4 35.0893 6.65487  24
   4   2   4 26.5613 5.58565   7
   4   2   4 29.9062 5.55998   1
   4  -2   4 27.7611 4.97668   1
   4   2  -4 36.3528 9.33918  22
   4  -2  -4 12.9516 8.90473  22
   4   2   5 0.52421 7.49285  19
  -4   2  -5 6.42008 5.98513  15
  -4   2  -5-7.26909 6.52279  25
  -4  -2  -5-4.98000 7.50323  24
  -4   2  -5 0.53167 6.81086  24
   4   2  -5 5.41690 9.55499  22
  -4   2   5-11.5258 12.3556   6
   4  -2  -5 4.81026 10.3703  22
  -4  -2   5-3.48765 9.72596   6
   4   2   6 759.142 24.5842  19
   4   2   6 838.801 24.1418   1
  -4   2  -6 739.258 24.9994  25
  -4   2  -6 813.010 24.5017  24
  -4   2   6 842.202 28.6319   6
  -4  -2   6 790.001 26.7449   6
   4  -2  -6 800.410 28.7375  22
   4  -3   0 829.733 21.6426   5
  -4  -3   0 836.785 22.0697  10
  -4   3   0 783.351 21.3357  15
   4  -3   0 789.937 21.1753   7
  -4   3   0 769.543 20.7713  25
  -4  -3   0 789.180 21.2429  24
   4  -3   0 793.152 23.5396  22
   4   3   0 794.602 20.5207   5
  -4   3   1 10.7289 4.77387  20
   4  -3  -1 15.4725 4.23076   5
  -4  -3   1 11.8616 4.69158  10
  -4  -3  -1 15.3998 4.20848  10
   4   3   1 13.5723 3.50354   5
   4  -3   1 19.5060 4.12795   5
  -4   3   1 18.6296 3.62298  15
  -4   3  -1 17.6668 3.96005  15
   4   3   1 12.6566 3.84519   7
   4  -3  -1 12.8091 3.89242   7
  -4   3  -1 15.8960 3.86067  25
   4  -3   1 16.3042 4.21813   7
  -4  -3  -1 12.1014 4.19275  24
   4   3   1 8.14675 3.92478   1
  -4  -3   2 864.718 23.1237  10
  -4  -3  -2 815.617 22.5162  10
   4   3   2 763.652 22.1535   1
  -4   3   2 810.730 21.1993  15
  -4   3  -2 882.417 22.6586  15
   4  -3  -2 846.775 21.7700   7
   4   3   2 845.477 21.9103   7
   4  -3   2 836.267 22.4679   7
  -4   3  -2 822.777 22.3955  25
   4  -3   2 790.380 21.4908   1
  -4  -3  -2 748.074 22.4527  24
   4  -3  -2 808.412 25.3307  22
  -4   3   2 809.940 23.4410  20
  -4  -3   3 248.306 10.8117  10
  -4  -3  -3 239.766 9.81406  10
   4   3   3 249.239 10.7705  19
   4   3   3 230.586 9.49830   1
  -4   3  -3 259.398 9.98261  15
   4   3   3 227.627 9.27259   7
  -4   3  -3 233.643 9.80020  25
  -4  -3  -3 227.855 9.94528  24
   4  -3  -3 219.517 12.8104  22
  -4   3   3 233.996 10.9656  20
   4   3   4 574.339 18.7789  19
  -4   3  -4 624.822 18.1382  15
   4   3   4 564.544 17.8382   1
  -4   3  -4 569.447 18.1906  25
   4   3   4 575.981 17.1780   7
  -4  -3   4 578.182 20.6039   6
   4   3  -4 597.777 20.6454  22
   4  -3  -4 563.090 22.1480  22
  -4   3   4 532.317 19.3519  20
  -4   3   5 21.7535 8.26367  20
   4   3   5 26.8576 6.12283   1
   4   3   5 32.2560 8.67847  19
  -4   3  -5 29.9548 6.67920  15
  -4   3  -5 12.6578 6.74394  25
  -4   3  -5 34.8056 7.33686  24
   4  -3  -5 29.4159 10.4177  22
  -4  -3   5 35.2451 10.8648   6
   4   3   6 376.026 15.9939  19
   4   3   6 371.505 14.9545   1
  -4   3   6 413.259 19.7901   6
  -4  -3   6 422.820 18.3149   6
   4  -3  -6 371.577 19.6027  22
   4  -4   0 1951.36 47.5603   5
  -4  -4   0 2046.43 48.3278  10
  -4   4   0 1950.41 47.4569  15
   4  -4   0 1865.25 46.8386   7
  -4   4   0 1895.85 46.6095  25
   4  -4   0 1974.53 49.4322  22
   4   4   0 1925.10 46.0750   5
  -4  -4   1 64.8480 6.48269  10
  -4  -4  -1 61.1293 6.09271  10
   4   4   1 73.1334 4.30253   5
   4  -4   1 59.4916 5.21052   5
  -4   4   1 60.0375 4.72477  15
  -4   4  -1 64.3682 5.13571  15
   4  -4   1 62.6884 7.16241  14
   4   4   1 64.4892 5.12539   7
   4  -4  -1 62.1286 4.90524   7
   4  -4   1 60.9596 5.40705   7
  -4   4  -1 72.3388 5.41192  25
  -4   4   1 69.6722 5.84316  11
   4  -4  -1 57.8872 7.97652  22
   4  -4  -1 59.8101 5.32490   5
  -4   4   2 1.68717 5.29150  20
  -4  -4   2-5.36070 7.30061  10
  -4  -4  -2 5.03468 5.02384  10
   4  -4   2 11.4842 4.82893   5
  -4   4   2 7.18593 3.50291  15
  -4   4  -2 11.8727 4.73095  15
  -4   4  -2 5.48609 4.47158  25
   4   4   2 4.33216 4.22905   7
   4  -4   2 13.5201 4.57980   7
   4  -4  -2 8.05487 7.58509  22
   4   4   2 8.35657 4.51400   1
  -4  -4   3 325.511 13.4269  10
  -4  -4  -3 307.867 12.2606  10
   4   4   3 318.587 13.3172  19
   4   4   3 319.670 12.0297   1
   4   4  -3 358.138 11.4498   8
  -4   4  -3 346.864 12.4762  15
   4   4   3 325.217 11.2930   7
  -4   4  -3 355.402 12.3425  25
  -4   4   3 352.563 13.6946  20
   4   4   4 1266.34 35.6068  19
  -4   4  -4 1438.47 35.3725  15
   4   4  -4 1347.96 34.1092   8
   4   4   4 1243.30 33.4175   7
  -4  -4   4 1350.32 36.3311   6
   4  -4  -4 1353.29 38.8508  22
  -4   4   4 1305.20 36.4858  20
  -4  -4   4 1221.31 34.9020  10
  -4   4   5 5.30017 8.86204  20
   4   4   5 11.1422 8.86676  19
  -4   4  -5 14.8258 6.94838  15
   4   4  -5 19.1648 7.23729   8
  -4   4  -5 14.8462 7.05268  25
   4   4   5 10.6025 6.32705   1
  -4  -4  -5 5.87575 8.58427  23
  -4  -4   5 7.38840 9.40173   6
  -4   4   6 16.1936 10.4637  20
   4   4   6 6.90310 8.86767  19
   4   4  -6-0.28744 8.58948   8
   4   4   6 2.84202 7.36978   1
  -4   4  -6 6.93873 8.19583  25
  -4   4   6 8.63892 13.9391   6
  -4  -4   6 5.68894 10.5302   6
   4  -5   0 1015.66 26.4810   5
  -4  -5   0 1053.12 27.7826  10
   4   5   0 1021.59 26.2713  16
  -4   5   0 962.885 26.2655  15
   4  -5   0 981.636 28.1637  14
   4  -5   0 961.111 25.6702   7
  -4   5   0 966.589 25.4225  25
   4  -5   0 1048.32 28.4768  22
  -4  -5   1 1082.45 29.5437  10
  -4  -5  -1 1046.38 28.9048  10
   4  -5   1 1095.32 28.2991   5
  -4   5   1 1103.56 27.7820  15
  -4   5  -1 1075.07 28.3711  15
   4  -5   1 1027.53 29.7338  14
   4   5   1 1052.25 27.3526   7
   4  -5   1 1057.40 27.6634   7
  -4   5  -1 1021.37 27.5287  25
  -4   5   1 1039.87 28.5228  11
   4  -5  -1 1090.02 30.7731  22
   4  -5  -1 1102.01 28.0176   5
  -4   5   2 16.3327 6.05345  20
  -4  -5   2 9.61390 7.62887  10
  -4  -5  -2 25.6733 6.67014  10
   4  -5   2 15.5279 5.18615   5
  -4   5   2 40.7722 4.44215  15
  -4   5  -2 14.0781 4.95291  15
   4  -5   2 22.0501 7.14849   2
  -4   5  -2 14.0769 4.69099  25
   4   5   2 17.3345 4.59850   7
   4   5   2 14.9340 4.82400   1
   4  -5  -2 20.1504 8.35925  22
  -4   5   2 6.71642 5.26749  11
  -4  -5  -3 668.231 20.1954  10
   4  -5   3 648.217 21.5825   2
   4   5   3 647.460 21.1060  19
   4   5   3 611.941 19.2913   1
  -4   5  -3 748.473 20.4294  15
   4   5   3 628.127 18.2145   7
  -4   5  -3 649.910 19.3670  25
  -4  -5   3 631.053 20.6193   6
   4  -5  -3 670.345 23.1090  22
  -4   5   3 638.414 21.0240  20
  -4  -5   3 638.939 20.8729  10
   4  -5   4 452.344 18.2136   2
   4   5   4 433.526 17.0650  19
  -4  -5   4 422.919 16.7058   4
   4   5  -4 405.056 14.6594   8
   4   5   4 421.546 13.9689   7
  -4  -5   4 479.172 17.0910   6
  -4  -5  -4 463.962 17.6429  23
  -4  -5   4 447.281 16.8879  10
  -4   5   4 452.021 17.2780  20
   4   5   5 680.102 23.8912  19
   4   5  -5 744.166 22.0880   8
  -4   5  -5 798.790 22.9568  15
   4   5   5 686.530 21.7292   1
  -4   5  -5 737.611 22.9853  25
  -4  -5  -5 662.054 23.9347  23
  -4  -5   5 691.044 23.3311   6
  -4   5   5 722.782 24.6251  20
   4   5   6 57.8844 7.65637   1
   4   5   6 42.4536 9.82934  19
   4   5  -6 78.7062 9.92579   8
  -4   5  -6 76.3600 10.5407  25
  -4   5   6 51.5819 14.1906   6
  -4  -5   6 56.3660 10.1789   6
  -4  -6   0 642.968 20.4580  10
   4  -6   0 657.446 19.0283   5
   4   6   0 681.833 18.9350  16
   4  -6   0 625.758 20.9243  14
  -4   6   0 617.133 17.6735  25
   4  -6   0 665.156 20.8377  22
   4  -6  -1 938.964 24.7032   5
  -4  -6   1 915.517 26.6978  10
  -4  -6  -1 921.073 26.4789  10
   4  -6   1 954.229 24.9932   5
   4   6  -1 906.590 25.3016  16
   4  -6   1 892.023 26.7498  14
   4  -6  -1 907.396 26.9953  14
   4   6   1 902.908 23.8873   7
  -4   6  -1 844.422 24.0946  25
  -4   6   1 911.887 25.6120  11
   4  -6  -1 884.302 27.3783  22
  -4  -6  -2 3284.06 79.1305  10
  -4   6   2 3238.86 76.7417  15
   4   6   2 3183.03 76.5116   7
  -4   6  -2 3229.67 77.6808  25
  -4   6   2 3213.55 79.0181  11
   4  -6  -2 3404.96 81.0390  22
   4  -6  -2 3315.55 77.5114   5
  -4  -6   2 3095.21 79.2575  10
  -4  -6  -3 607.390 20.1952  10
   4  -6   3 594.052 20.8752   2
   4   6   3 489.732 19.6677  19
   4   6   3 609.930 18.7156   1
  -4   6  -3 726.659 20.0093  15
   4   6   3 602.122 17.3108   7
  -4   6  -3 646.356 19.1128  25
  -4   6   3 612.008 19.9993  11
  -4  -6   3 609.715 20.6421  10
  -4   6   3 558.068 19.9339  20
   4  -6   4 253.048 14.3833   2
   4   6   4 260.033 13.6074  19
  -4  -6   4 221.603 12.8155   4
   4   6   4 243.392 11.1288   1
  -4   6  -4 313.528 13.1195  15
  -4   6  -4 261.460 12.2435  25
  -4  -6  -4 243.120 14.1158  23
  -4  -6   4 257.970 13.8522  10
  -4   6   4 264.146 13.5425  20
   4  -6   5 437.702 20.9065   2
   4   6   5 478.123 20.1155  19
   4   6  -5 520.262 17.5174   8
  -4   6  -5 554.492 18.7110  15
   4   6   5 496.249 17.3214   1
  -4   6  -5 551.258 18.8417  25
  -4  -6  -5 464.786 19.8248  23
  -4   6   5 484.443 20.3300  20
   4   6   6 1012.99 31.4321  19
   4   6  -6 1026.68 29.3804   8
  -4  -6  -6 905.277 31.7115  23
   4   6   6 1015.68 29.0636   1
  -4   6   6 997.433 33.8947   6
   4  -7   0 894.147 23.9195   5
   4   7   0 850.559 23.7510  16
   4  -7   0 813.052 26.1712  14
  -4   7   0 819.074 22.3681  25
   4  -7   0 870.518 25.2184  22
  -4  -7   0 837.239 25.5412  10
  -4  -7   1 14.0268 8.49689  10
  -4  -7  -1 19.9593 7.96489  10
   4  -7  -1 15.5961 5.66613   5
   4  -7   1 19.8825 5.88610   5
   4   7  -1 20.2471 6.28774  16
   4  -7   1 10.1622 8.20277  14
   4  -7  -1 19.0068 8.12923  14
   4   7   1 16.4086 4.74727   7
  -4   7  -1 14.0328 4.73395  25
   4  -7  -1 9.75012 7.92505  22
  -4   7   1 15.5011 6.45143  11
  -4  -7   2 52.7764 9.54862  10
  -4  -7  -2 68.3550 9.35651  10
   4   7  -2 73.7172 8.07953  16
   4  -7   2 69.6273 9.35824  14
   4  -7  -2 54.7454 9.77465  14
   4   7   2 69.6001 5.74155   7
  -4   7  -2 71.4660 6.60870  25
   4  -7  -2 64.5025 10.1373  22
  -4   7   2 69.6222 8.06251  11
   4  -7  -2 70.9886 6.46080   5
  -4   7   3 0.33710 7.70160  20
  -4  -7   3 1.28950 9.66080  10
  -4  -7  -3-1.72989 8.56371  10
   4   7   3-1.66408 9.02598  19
   4   7  -3 6.28694 6.88202  16
  -4   7  -3-1.59653 7.30629  13
   4  -7   3-1.04095 8.25429   2
  -4   7  -3-1.52694 6.06808  25
  -4   7   3 1.97281 7.01498  11
   4  -7   4 449.141 18.9449   2
   4   7   4 407.341 17.8451  19
  -4  -7   4 449.407 17.8643   4
   4   7   4 429.047 15.8156   1
  -4   7  -4 496.065 17.7127  15
  -4   7  -4 483.126 16.8484  25
  -4   7   4 456.275 17.7281  11
  -4  -7  -4 416.302 18.1604  23
  -4  -7   4 388.274 18.3559  10
  -4   7   4 453.088 18.1559  20
  -4   7   5 34.2679 10.7018  20
   4   7   5 34.1627 11.2878  19
   4   7   5 49.7105 7.46671   1
  -4   7  -5 58.0811 9.58121  15
  -4  -7   5 46.5041 11.6679   4
   4  -7   5 68.2184 13.1456   2
  -4   7  -5 43.5730 8.76339  25
  -4  -7  -5 42.5241 11.8109  23
   4   7  -6 93.9208 10.7741   8
   4  -8   0 222.125 10.0745   5
   4   8   0 240.191 10.9512  16
   4  -8   0 216.277 13.5300  14
  -4  -8   0 197.915 12.8147  10
   4  -8  -1 375.205 13.5036   5
   4  -8   1 373.068 13.7041   5
   4   8  -1 385.079 14.4602  16
   4  -8   1 352.885 16.5244  14
   4  -8  -1 378.910 16.7854  14
   4   8   1 397.160 12.4137   7
  -4   8  -1 365.345 12.8236  25
  -4   8   1 408.747 15.1851  11
   4  -8  -1 393.869 16.2156  22
  -4  -8  -1 367.272 16.1066  10
   4   8  -2 393.796 16.1753  16
   4  -8   2 459.891 18.7410  14
   4  -8  -2 433.938 18.4109  14
  -4   8  -2 447.863 15.1744  25
   4  -8  -2 412.317 18.0852  22
  -4  -8   2 409.461 18.1396  10
  -4  -8  -2 409.280 17.3009  10
   4  -8  -2 464.488 14.8823   5
  -4   8   3 60.2414 9.82376  20
  -4  -8   3 57.6098 11.7936  10
   4   8  -3 79.2303 9.32289  16
  -4   8  -3 62.8006 9.65576  13
  -4   8  -3 68.9560 7.71596  25
  -4  -8  -3 74.6787 10.9673  23
   4   8   3 70.7539 8.35829   1
  -4   8   3 66.9826 9.33942  11
   4   8   4 157.971 12.7730  19
   4  -8   4 152.314 12.2062   2
   4   8   4 151.343 9.81998   1
  -4  -8   4 163.112 12.2588   4
   4   8  -4 170.687 11.8747  16
  -4   8  -4 186.141 10.7121  25
  -4   8   4 168.751 12.3968  11
  -4  -8  -4 172.930 14.2956  23
  -4   8   4 182.021 12.7598  20
   4   8   5 416.664 19.5532  19
  -4  -8   5 419.439 18.7980   4
   4   8   5 394.696 15.9352   1
   4  -9   0 331.454 12.9184   5
   4   9   0 352.533 13.6638  16
   4  -9   0 340.850 16.8263  14
  -4  -9   0 339.737 16.6461  10
   4  -9   1 279.660 11.7796   5
   4   9  -1 279.245 12.7248  16
   4  -9  -1 274.351 15.5394  14
  -4   9  -1 270.719 10.7330  25
  -4   9   1 278.464 13.2782  11
  -4  -9  -1 235.689 14.4131  10
   4   9   2 210.727 13.6532  19
   4   9  -2 187.249 11.3406  16
   4  -9   2 189.946 12.9013  14
   4  -9  -2 200.294 14.3245  14
  -4   9  -2 189.653 10.1977  25
  -4   9   2 195.112 11.8095  11
   4  -9  -2 212.557 14.1798  22
  -4  -9   2 169.292 15.0258  10
  -4  -9  -2 181.870 13.2093  10
   4   9  -3 44.3389 8.49881  16
  -4  -9   3 55.4138 10.7613   4
   4  -9  -3 44.9530 11.3735  14
  -4   9  -3 38.4978 9.09956  13
  -4   9  -3 46.5070 7.85712  25
   4   9   3 38.7341 7.45440   1
  -4   9   3 44.2372 10.0080  11
   4  -9   4 239.231 15.5361   2
   4   9   4 231.548 11.8230   1
  -4  -9   4 231.168 14.1149   4
   4   9  -4 205.149 12.6311  16
  -4   9  -4 200.021 13.6242  13
  -4   9  -4 247.410 13.1802  25
  -4   9   4 197.613 13.8074  11
  -4  -9  -4 204.069 14.8204  23
  -4   9   4 212.671 13.9196  20
  -4 -10   0 69.4741 13.4631  10
   4  10   0 65.6003 8.96047  16
   4 -10   0 67.1121 11.6787  14
   4  10  -1 374.086 15.7821  16
   4 -10   1 409.309 18.9163  14
   4 -10  -1 429.762 19.8177  14
  -4  10   1 407.992 16.9039  11
  -4 -10  -1 414.018 19.3597  10
   4  10   2 185.204 13.7922  19
   4  10  -2 176.860 11.4498  16
   4 -10   2 159.808 14.1015  14
   4 -10  -2 184.796 15.3817  14
  -4  10  -2 172.629 9.72046  25
  -4  10   2 163.516 12.3218  11
  -4 -10  -2 177.661 13.5179  23
  -4 -10  -2 159.945 13.4436  10
   4  10   3 107.077 13.2750  19
   4  10  -3 126.378 11.2077  16
  -4 -10   3 117.709 12.4928   4
   4 -10  -3 117.514 13.8623  14
  -4  10  -3 131.114 10.0752  25
  -4  10   3 125.537 11.4392  11
  -4 -10  -3 110.275 12.8488  23
   4  11   0 159.888 11.6753  16
   4 -11   0 167.857 14.2835  14
   4  11  -1 696.471 22.4793  16
   4 -11   1 694.170 26.0403  14
   4 -11  -1 645.676 26.0497  14
  -4 -11  -1 703.549 24.0006  23
   4  11   2 29.6599 12.5698  19
   4  11  -2 11.8435 9.97527  16
   4 -11   2 11.2060 12.4049  14
   4 -11  -2 13.7238 11.3117  14
  -4  11  -2 20.0647 7.27129  25
  -4 -11  -2 27.9362 12.1784  23
  -4  11   2 39.9437 10.6148  11
   4  12  -1 296.521 15.5327  16
  -4 -12  -1 313.609 16.8285  23
   5   0   0-0.72763 4.46954   5
   5   0   0 1.32218 4.66786   7
  -5   0   0 2.38446 4.50668  24
   5   0   1 240.582 9.49458   5
  -5   0   1 206.508 9.80423  10
  -5   0  -1 240.659 10.0083  10
   5   0  -1 227.026 9.54624   7
   5   0   1 224.498 9.51966   7
  -5   0  -1 228.640 9.89564  24
  -5   0   1 216.551 8.74783  24
   5   0  -1 225.624 9.34996   5
  -5   0   2 1.14327 5.57292  10
  -5   0  -2-0.47578 5.70291  10
   5   0   2 4.90261 5.24161   5
   5   0   2-0.21123 5.44073   7
  -5   0  -2 2.09824 5.75737  24
   5   0  -2-1.55071 8.25515  22
   5   0   2 0.38727 4.46101   1
  -5   0   3 16.7550 6.25615  10
  -5   0  -3 14.9062 6.31950  10
   5   0   3 21.6588 5.46083   1
  -5   0  -3 16.7671 6.63184  24
   5   0  -3 16.8386 9.91293  22
  -5   0  -4 0.29547 7.27592  24
   5   0  -4-12.7196 12.0372  22
   5   0   4-2.79743 6.57246   1
   5   0   5 326.016 13.7578   1
  -5   0  -5 335.716 15.2852  24
  -5   0   5 321.448 19.0388   6
   5   0  -5 310.350 18.5146  22
   5   1   0 791.514 21.5528   5
   5  -1   0 785.775 21.9173   5
  -5  -1   0 776.011 22.6737  10
   5   1   0 768.823 21.7444   7
   5  -1   0 796.285 21.9061   7
  -5  -1   0 791.371 21.7300  24
   5   1   1 1523.53 37.2298   5
   5  -1   1 1478.61 37.5327   5
  -5  -1   1 1479.54 38.2217  10
  -5  -1  -1 1481.34 38.3118  10
  -5   1   1 1476.38 38.1882  10
  -5   1  -1 1504.06 38.4013  10
   5   1   1 1460.83 37.1391   1
   5   1  -1 1486.89 37.6343   7
   5  -1  -1 1455.22 37.2875   7
   5   1   1 1459.38 37.4914   7
   5  -1   1 1512.46 37.6517   7
  -5  -1   1 1422.40 36.6485  24
  -5  -1  -1 1505.26 37.8108  24
   5   1  -1 1472.63 37.1985   5
   5  -1  -1 1412.43 37.3465   5
   5  -1   2 75.3431 6.19371   1
  -5  -1   2 70.1590 7.07424  10
  -5  -1  -2 96.1490 7.02719  10
  -5   1   2 67.3728 6.82737  10
   5  -1   2 69.1029 6.57687   5
   5   1   2 70.4582 6.34052   5
  -5   1  -2 69.6212 7.24738  10
   5  -1  -2 93.1923 7.16482   7
   5   1   2 74.3948 6.25351   1
  -5  -1  -2 75.8730 7.06048  24
   5  -1   2 58.6455 6.77151   7
  -5   1  -2 61.0838 6.84027  24
   5  -1  -2 64.9634 9.81363  22
  -5  -1   3 1933.13 48.5105  10
  -5  -1  -3 1905.41 48.5679  10
  -5   1   3 1935.34 48.2727  10
  -5   1  -3 2018.39 48.8599  10
   5  -1   3 1825.42 47.8639   1
   5   1   3 1900.16 48.1225   7
   5  -1   3 1798.68 48.0003   7
  -5   1  -3 2080.39 49.4279  24
   5   1   3 1881.52 48.0462   1
   5   1  -3 1957.05 52.0029  22
   5  -1  -3 1913.96 52.2450  22
   5   1   4 613.219 19.3846   1
   5  -1   4 567.104 18.9074   1
   5   1   4 614.808 19.3708   7
  -5  -1  -4 586.919 19.9658  24
  -5   1  -4 653.019 20.7802  24
   5   1  -4 631.210 23.8002  22
   5  -1  -4 622.992 23.7854  22
   5   1   5 373.829 15.4030   1
   5  -1   5 397.306 15.2287   1
  -5  -1  -5 442.502 17.3414  24
  -5   1  -5 427.361 17.4786  24
  -5  -1   5 416.055 20.2783   6
   5   1  -5 466.978 21.1134  22
   5  -1  -5 416.702 20.9552  22
   5   2   0 524.143 15.4656   5
   5  -2   0 536.483 16.1404   5
  -5  -2   0 504.802 16.7828  10
  -5   2   0 508.751 15.9984  15
   5   2   0 492.221 15.8281   7
   5  -2   0 531.404 15.9436   7
  -5  -2   0 530.103 15.7786  24
   5   2   1 241.049 9.34981   5
   5  -2   1 264.427 10.2791   5
  -5  -2   1 235.413 10.6235  10
  -5  -2  -1 214.777 10.4674  10
  -5   2   1 245.010 10.4232  10
  -5   2  -1 234.624 10.3020  10
   5   2   1 241.125 9.74784   1
  -5   2  -1 229.653 9.92386  15
   5  -2  -1 241.352 9.80493   7
   5  -2   1 240.454 9.93316   7
  -5  -2   1 212.978 9.04528  24
  -5  -2  -1 235.298 10.1197  24
   5  -2  -1 256.367 13.2670  22
   5   2  -1 224.069 9.22323   5
   5   2   2 3.95247 6.56114  19
   5  -2   2-0.72697 4.40018   1
  -5  -2   2 5.91927 6.24250  10
  -5  -2  -2 4.60038 5.96215  10
   5  -2   2 1.75549 5.37993   5
  -5   2   2-1.37964 5.16880  10
   5   2   2 3.77790 5.05743   5
  -5   2  -2-1.01729 5.93158  10
  -5   2  -2-0.70850 5.29492  15
   5   2   2 1.48302 5.16757   1
   5  -2  -2 4.55906 5.22223   7
   5   2   2-0.40509 5.25507   7
   5  -2   2 4.54424 5.59229   7
  -5  -2  -2 4.46690 5.75130  24
  -5  -2   3 349.546 13.8735  10
  -5  -2  -3 324.933 13.3494  10
  -5   2   3 346.151 12.8242  10
  -5   2  -3 366.615 13.7111  10
  -5   2  -3 356.383 13.3086  15
   5  -2   3 329.121 12.1416   1
   5   2   3 339.431 12.7400   7
   5   2   3 355.523 13.2046   1
   5  -2   3 325.840 12.9816   7
   5  -2  -3 337.595 17.2620  22
  -5   2   3 342.420 14.3230  20
  -5   2  -4 243.163 11.9527  15
   5   2   4 230.776 10.9964   7
  -5  -2  -4 269.360 12.7455  24
   5  -2   4 224.043 10.8614   1
  -5   2  -4 271.762 13.0765  24
   5   2  -4 270.331 16.1513  22
   5   2   4 253.760 11.4102   1
   5  -2  -4 245.585 16.7620  22
  -5   2   4 216.203 13.4366  20
   5   2   5 46.2466 7.56521   1
  -5  -2  -5 62.1591 9.64837  24
  -5   2  -5 41.8637 8.73207  24
   5   2  -5 55.2119 12.1228  22
   5  -2  -5 65.6104 13.8733  22
  -5  -2   5 45.8548 13.7894   6
   5   3   0 1943.99 46.1515   5
  -5  -3   0 1893.34 48.0920  10
   5   3   0 1794.13 46.6328   1
  -5   3   0 1883.03 46.9892  15
   5  -3   0 1928.26 46.7576   7
  -5  -3   0 1858.70 46.8579  24
  -5  -3   1 145.619 8.89464  10
  -5  -3  -1 134.229 8.93598  10
   5   3   1 143.769 7.02657   5
   5   3   1 124.937 7.54502   1
  -5   3   1 136.054 7.60111  15
  -5   3  -1 121.510 7.71297  15
   5   3   1 133.890 7.85768   7
   5  -3  -1 137.301 7.60100   7
   5  -3   1 144.307 8.02125   7
  -5  -3  -1 135.449 8.28939  24
   5  -3  -1 128.905 11.2570  22
   5   3  -1 123.811 7.02606   5
   5  -3  -1 158.220 8.08038   5
  -5  -3   2 1302.02 34.6310  10
  -5  -3  -2 1311.47 34.2075  10
   5  -3   2 1215.11 33.4915   5
  -5   3   2 1297.00 34.0146  10
   5   3   2 1267.15 33.5688   1
   5   3   2 1264.67 33.1738   7
   5  -3   2 1314.93 33.6374   7
  -5   3  -2 1179.77 33.3952  25
  -5  -3  -2 1247.57 33.9877  24
   5  -3  -2 1347.73 37.6506  22
  -5  -3   3 121.898 9.89166  10
  -5  -3  -3 121.049 8.85897  10
   5   3   3 133.078 9.72755  19
  -5   3   3 139.027 8.51709  10
  -5   3  -3 133.434 8.75468  15
   5   3   3 139.440 8.39467   1
   5   3   3 131.704 8.22343   7
  -5   3  -3 142.175 9.18454  25
   5  -3   3 152.415 9.03258   7
  -5  -3  -3 92.1775 9.16344  24
  -5   3   3 131.181 9.96784  20
   5   3   4 925.055 28.9262  19
  -5   3  -4 946.294 28.6737  15
  -5   3  -4 993.931 29.1080  25
   5   3   4 918.899 27.5871   7
   5   3   4 923.651 28.1632   1
  -5  -3   4 1015.23 31.9753   6
   5  -3  -4 977.241 33.2578  22
   5   3   5 65.8968 7.92675   1
  -5   3  -5 90.9755 9.62263  15
  -5   3  -5 74.7591 9.66994  25
  -5   3  -5 81.0538 10.6571  24
   5  -3  -5 98.8682 15.7870  22
  -5  -3   5 94.4781 13.0120   6
   5   4   0 139.492 8.28619   1
   5  -4   0 143.855 8.22733   5
  -5  -4   0 156.964 9.85646  10
  -5   4   0 157.521 8.11393  15
   5   4   0 154.254 8.28300   7
   5  -4   0 160.147 8.31021   7
  -5  -4   1 212.236 11.2035  10
  -5  -4  -1 200.077 10.7492  10
   5  -4   1 228.591 10.1562   5
   5   4   1 201.658 9.91260   1
  -5   4   1 182.906 9.01698  15
  -5   4  -1 220.492 10.1437  15
   5   4   1 213.273 9.54394   7
   5  -4   1 221.734 9.87337   7
  -5   4  -1 213.208 9.64633  25
   5  -4  -1 235.686 13.3828  22
   5   4  -1 216.309 8.59633   5
   5  -4  -1 222.457 10.0158   5
  -5   4   2 56.0857 8.19798  20
   5   4   2 55.4262 6.43883   1
   5  -4  -2 55.5743 6.51013   5
  -5  -4   2 45.8468 8.92094  10
  -5  -4  -2 42.0536 7.25394  10
  -5   4  -2 50.2605 6.85748  25
   5   4   2 54.0617 6.74994   7
   5  -4   2 40.0089 6.90017   7
   5  -4  -2 44.4144 10.0989  22
  -5   4   3 70.5174 9.02699  20
  -5   4   3 76.1640 7.63186  10
  -5  -4   3 75.3084 10.2911  10
   5   4   3 69.9232 8.92488  19
  -5  -4  -3 71.5828 8.82793  10
   5   4   3 61.1373 7.62450   1
  -5   4  -3 78.5791 8.17912  15
  -5   4  -3 66.1156 7.56255  25
   5   4   3 57.8073 6.56377   7
   5  -4  -3 51.8370 11.4370  22
  -5   4   4 45.1737 9.99218  20
   5   4   4 57.6882 9.54836  19
  -5   4  -4 70.2403 8.80543  15
   5   4   4 74.1171 7.76958   1
  -5   4  -4 47.4912 8.17993  25
   5   4   4 59.1803 7.52370   7
  -5  -4   4 73.5577 13.3698   6
   5   4   5 223.764 13.3514  19
  -5   4  -5 233.715 12.5633  15
  -5   4  -5 267.716 13.6722  24
  -5  -4   5 248.052 15.7471   6
   5  -4  -5 203.916 18.5903  22
  -5   4   5 216.432 14.2325  20
  -5  -5   0 503.093 18.0903  10
   5  -5   0 485.968 16.2522   5
  -5   5   0 463.830 15.8461  15
   5   5   0 517.052 15.8398   7
   5  -5  -1 833.244 23.5267   5
  -5  -5   1 866.479 25.7335  10
  -5  -5  -1 816.490 24.9791  10
   5   5   1 785.328 23.2076   1
   5  -5   1 822.404 23.5940   5
  -5   5   1 744.699 22.4909  15
  -5   5  -1 774.935 23.4288  15
   5   5   1 808.932 22.7942   7
   5  -5   1 825.846 23.0438   7
  -5   5  -1 824.729 22.9307  25
   5  -5  -1 838.365 26.5951  22
  -5  -5   2 2891.73 72.3212  10
  -5  -5  -2 2684.59 71.3494  10
   5  -5   2 2977.11 70.7905   5
   5   5   2 2848.33 70.4278   1
   5   5   2 2889.93 69.4846   7
  -5   5  -2 2793.45 70.3490  25
   5  -5   2 2887.11 70.1178   7
   5  -5  -2 2980.79 74.1683  22
   5  -5  -2 2948.51 70.2540   5
  -5   5   2 2960.55 72.1255  20
  -5  -5   3 272.221 14.4159  10
  -5  -5  -3 267.875 13.9887  10
   5   5   3 263.043 13.6135  19
   5   5   3 273.219 12.4336   1
  -5   5  -3 284.457 12.7823  15
   5   5   3 274.432 11.4071   7
  -5   5  -3 269.913 12.2698  25
   5  -5  -3 282.867 16.3853  22
  -5   5   3 301.637 14.3267  20
   5   5   4 289.741 14.7699  19
  -5   5  -4 291.543 13.4325  15
   5   5   4 272.366 12.8001   1
   5   5   4 271.005 11.9117   7
  -5   5  -4 284.788 13.3251  25
   5  -5  -4 276.038 18.7539  22
  -5   5   4 284.956 15.0251  20
   5   5   5 803.191 26.4407  19
  -5  -5  -5 762.752 27.2448  23
  -5  -6   0 56.8447 10.3338  10
   5  -6   0 42.9138 6.97073   5
  -5   6   0 54.6962 6.91159  15
   5   6   0 51.5960 6.71230   7
   5  -6   0 37.9315 9.47179  22
  -5  -6   1 43.3791 11.2390  10
  -5  -6  -1 62.5288 10.7130  10
   5  -6  -1 29.0864 7.43765   5
   5  -6   1 43.4806 6.84305   5
   5   6  -1 50.2886 7.46139  16
  -5   6  -1 82.5106 7.82493  15
  -5   6   1 30.9585 6.80954  15
   5   6   1 55.5161 6.50147   7
  -5   6  -1 47.4591 6.71811  25
   5   6   2 18.9916 6.37411   1
  -5   6   2 22.6183 8.60496  20
   5  -6  -2 23.3401 7.13540   5
  -5  -6   2-3.09199 10.6780  10
  -5  -6  -2 12.7318 10.0359  10
   5   6  -2 19.3613 7.90720  16
  -5   6  -2 15.0422 6.42539  25
   5   6   2 12.1202 6.15210   7
   5  -6  -2 21.1913 10.5705  22
  -5  -6  -3 212.470 13.1575  10
   5   6   3 206.878 13.2066  19
   5   6   3 206.290 10.6041   1
  -5   6  -3 227.523 11.9475  15
   5   6   3 192.701 9.89552   7
  -5   6  -3 201.433 10.9171  25
   5  -6  -3 219.891 16.1893  22
   5  -6  -3 205.386 10.6628   5
  -5   6   3 210.252 13.0626  20
  -5  -6   3 210.441 14.2814  10
  -5   6   4 32.6116 10.4834  20
   5   6   4 30.4741 10.7205  19
   5   6   4 30.8482 7.04953   1
  -5   6  -4 37.5480 8.93013  15
  -5   6  -4 31.5609 9.17132  25
  -5  -6  -4 25.5391 11.0630  23
   5  -6  -4 30.0022 12.1436  22
  -5  -7   0 515.158 20.4696  10
   5  -7   0 552.196 17.6643   5
  -5   7   0 526.456 17.3320  15
  -5  -7   1 451.800 20.0061  10
  -5  -7  -1 441.734 19.2026  10
   5  -7  -1 492.589 16.7941   5
   5  -7   1 464.714 16.7672   5
   5   7  -1 486.754 17.1456  16
  -5   7   1 481.445 16.2097  15
  -5   7  -1 524.256 17.4089  15
   5   7   1 468.572 15.4733   7
   5  -7  -1 499.142 20.2381  22
  -5   7   2-1.05738 7.96441  20
  -5  -7   2 1.50168 11.8722  10
  -5  -7  -2 17.1535 10.3616  10
   5  -7  -2-1.00311 6.76908   5
   5   7  -2 11.2076 8.13188  16
  -5   7  -2 2.90750 7.22428  15
  -5   7  -2 4.72694 6.56002  25
   5   7   2 1.38410 6.10602   7
   5  -7  -2 8.62986 11.5689  22
   5   7   2 4.77741 6.39941   1
  -5  -7  -3 119.383 11.9776  10
   5   7   3 124.570 11.6649  19
  -5  -7   3 125.341 14.3456  10
   5   7   3 130.764 9.55756   1
   5   7  -3 127.719 11.1189  16
  -5   7  -3 137.215 11.0978  15
  -5   7  -3 154.594 10.4275  25
   5  -7  -3 133.539 15.0492  22
   5  -7  -3 130.863 9.15310   5
  -5   7   3 131.026 12.2296  20
   5   7   4 389.398 18.3404  19
   5   7  -4 406.141 17.0642  16
  -5   7  -4 437.860 17.3577  25
   5  -7  -4 433.791 20.9836  22
   5  -8   0 91.7961 8.67102   5
  -5  -8   0 82.5045 13.7489  10
  -5   8   0 100.984 8.78013  15
   5   8   0 71.4107 8.16424   7
  -5  -8   1 19.5766 12.1776  10
  -5  -8  -1 33.8554 12.5274  10
   5  -8  -1 22.1970 7.46545   5
   5  -8   1 24.3423 8.03254   5
   5   8  -1 30.6810 8.40692  16
  -5   8   1 25.5279 6.69382  15
  -5   8  -1 38.3980 7.68872  15
   5  -8   1 33.2545 10.0899  14
   5   8   1 23.8938 6.19098   7
  -5   8   2 705.506 24.0296  20
   5  -8  -2 750.522 22.0790   5
   5   8   2 659.642 22.2064   1
   5   8  -2 712.777 23.3463  16
  -5   8  -2 667.775 21.6039  25
   5  -8  -2 735.139 26.0520  22
  -5  -8   2 669.181 24.9321  10
  -5  -8  -2 662.032 24.9082  10
  -5   8   3-12.9357 10.8757  20
   5   8   3 7.36156 6.88331   1
  -5  -8   3 7.85683 11.9668  10
   5  -8  -3 3.69146 6.89035   5
   5   8   3-3.20843 10.1161  19
   5   8  -3 15.6747 9.78857  16
  -5   8  -3 11.3655 9.13093  15
  -5   8  -3-4.06689 8.11681  25
  -5   8   3 9.89169 9.42010  11
   5  -8  -3-1.93994 11.6711  22
   5  -9   0 859.688 25.7640   5
  -5   9   0 896.167 26.3001  15
   5  -9   0 856.245 29.4554  14
  -5  -9   0 858.903 29.0829  10
   5  -9  -1 236.378 12.1074   5
   5  -9   1 225.776 11.7058   5
  -5   9   1 219.899 11.1217  15
  -5   9  -1 247.021 12.7922  15
   5  -9   1 219.663 14.6936  14
  -5  -9   1 257.399 17.0354  10
  -5  -9  -1 205.749 15.7848  10
   5   9   2 710.740 25.7012  19
   5   9  -2 717.520 24.1133  16
  -5   9  -2 719.686 22.8083  25
  -5  -9   2 769.942 28.0552  10
  -5  -9  -2 686.853 26.3509  10
  -5   9  -3 165.028 10.9835  25
   5  -9  -3 151.308 16.8837  22
   5 -10   0 15.7029 13.0507  14
   6   0   0 22.0024 6.45138   5
   6   0   0 24.8523 6.82557   7
  -6   0   0 14.8833 6.60008  24
   6   0  -1 5.74596 6.55632   5
   6   0   1 5.56315 5.96663   5
  -6   0   1-3.58343 7.26740  10
  -6   0  -1 1.81875 6.62755  10
   6   0  -1 1.17363 6.17277   7
   6   0   1-0.73536 6.42152   7
  -6   0  -1-2.14314 6.99556  24
  -6   0   2 848.557 25.4700  10
  -6   0  -2 813.452 25.5275  10
   6   0   2 870.401 24.3546   5
   6   0  -2 843.463 24.6239   7
   6   0   2 812.598 24.2200   7
  -6   0  -2 786.800 24.9735  24
   6   0  -2 843.376 24.2488   5
  -6   0   3-1.51065 7.71478  10
  -6   0  -3 3.15966 8.48671  10
   6   0   3-1.82337 6.89339   1
  -6   0  -3 0.32905 7.94236  24
   6   1   0 665.464 20.2801   5
   6  -1   0 694.149 20.7771   5
   6   1   0 650.816 20.5934   7
   6  -1   0 689.216 20.8291   7
  -6  -1   0 687.207 20.7942  24
  -6   1   0 706.684 20.9330  24
  -6  -1   1 339.028 15.3550  10
  -6  -1  -1 390.257 16.0736  10
   6  -1   1 439.979 14.8830   5
   6   1   1 431.673 14.5352   5
  -6   1   1 407.490 15.8555  10
  -6   1  -1 402.269 15.7191  10
   6   1  -1 401.846 14.5721   7
   6  -1  -1 391.831 14.4617   7
   6   1   1 396.265 14.5863   7
   6  -1   1 393.736 14.7428   7
  -6  -1  -1 390.304 15.0271  24
  -6   1  -1 425.606 15.4559  24
   6   1  -1 392.713 14.0051   5
   6  -1  -1 403.531 14.5487   5
   6   1  -2 0.23198 6.33646   5
   6  -1  -2 0.74272 6.97795   5
  -6  -1   2-7.08296 8.45599  10
  -6  -1  -2-12.0270 8.34855  10
  -6   1   2-5.94470 8.04188  10
  -6   1  -2 3.76115 7.27455  10
   6  -1   2 2.00378 6.52391   5
   6   1   2 9.26649 6.32071   5
   6   1  -2 6.39003 7.66741   7
   6  -1  -2 4.65652 6.26900   7
   6  -1   2 7.28857 7.18920   7
  -6  -1  -2 1.75321 7.65496  24
  -6   1  -2 8.42414 7.86669  24
   6   1   2 4.28251 6.06711   1
  -6  -1   3 141.640 11.8524  10
  -6  -1  -3 156.480 10.8518  10
  -6   1   3 173.598 11.1700  10
  -6   1  -3 161.989 11.1209  10
   6  -1   3 151.594 9.08397   1
   6  -1  -3 168.188 10.3953   7
   6   1   3 152.422 9.67884   7
   6  -1   3 163.164 10.7240   7
  -6  -1  -3 149.408 11.3747  24
  -6   1  -3 129.459 10.9595  24
   6  -1  -3 149.441 13.8412  22
   6   1   3 139.509 9.62767   1
   6   2   0 65.8972 7.02769   5
   6  -2   0 73.0907 7.80481   5
   6   2   0 51.5510 7.82404   7
   6  -2   0 58.5275 7.85879   7
  -6  -2   0 62.3474 7.71912  24
   6  -2  -1 1145.71 30.9682   5
  -6  -2   1 1092.94 32.0237  10
  -6  -2  -1 1158.14 32.1387  10
   6  -2   1 1181.92 31.1203   5
   6   2   1 1162.23 30.0870   5
  -6   2   1 1124.57 31.8630  10
  -6   2  -1 1030.16 31.5917  10
   6   2  -1 1147.97 30.7853   7
   6  -2  -1 1079.12 30.3168   7
   6  -2   1 1076.44 30.7194   7
  -6  -2  -1 1129.63 31.1329  24
   6   2  -1 1120.30 30.0380   5
  -6  -2   2 2765.78 70.3575  10
  -6  -2  -2 2738.11 69.9923  10
  -6   2   2 2738.92 69.5931  10
  -6   2  -2 2917.69 70.4421  10
   6  -2   2 2778.66 68.9890   5
   6   2  -2 2861.66 69.2362   7
   6  -2  -2 2755.30 68.2647   7
   6   2   2 2704.80 68.6628   7
   6  -2   2 2808.45 69.0841   7
   6   2   2 2706.74 68.5039   1
  -6  -2  -2 2746.31 69.6484  24
  -6   2  -2 3035.62 70.4563  24
   6   2  -2 2867.70 68.3460   5
   6  -2  -2 2848.24 68.8957   5
  -6  -2   3 643.247 22.3492  10
  -6  -2  -3 669.556 22.1092  10
  -6   2   3 652.136 21.3666  10
  -6   2  -3 649.950 21.8835  10
   6   2   3 657.469 20.8000   7
   6  -2   3 636.445 21.1288   7
  -6  -2  -3 635.622 22.0393  24
  -6   2  -3 662.056 22.1661  24
   6   2   3 617.206 20.2808   1
   6  -3   0-1.04478 6.76786   5
  -6   3   0 1.90187 7.65684  10
   6  -3   0 5.87614 6.91176   7
   6  -3  -1 3.12784 7.18258   5
  -6  -3   1 1.65442 8.99010  10
  -6  -3  -1 6.75094 7.79495  10
   6  -3   1 1.06830 7.47358   5
  -6   3   1 13.0252 7.73035  10
  -6   3  -1 6.50341 6.97813  10
   6   3  -1 5.88005 7.66561   7
   6   3   1 2.90860 6.31366   7
   6  -3  -1-0.22675 6.70885   7
   6  -3   1-0.24888 6.81833   7
  -6  -3  -1 4.63625 7.17696  24
   6   3  -2-0.86049 6.59639   5
  -6  -3   2-4.43567 9.70675  10
  -6  -3  -2 0.32382 7.58885  10
  -6   3   2 0.90969 6.86333  10
  -6   3  -2-4.68376 8.00790  10
   6  -3   2 22.6140 8.17099   5
  -6   3  -2 3.06191 7.74438  15
   6   3   2 1.57645 5.87510   1
   6   3   2-8.23538 7.48962   7
  -6  -3  -2 3.62643 7.94719  24
   6  -3   2 2.93663 7.36452   7
   6  -3  -2-14.2091 12.6907  22
  -6  -3   3 144.701 12.9060  10
  -6  -3  -3 160.038 11.4156  10
  -6   3   3 151.109 10.7143  10
  -6   3  -3 168.684 12.0605  10
   6   3   3 145.209 10.3433   7
   6  -3   3 158.488 10.2593   7
   6   3   3 129.929 9.62333   1
   6  -3  -3 161.836 16.5531  22
  -6  -4   0 2959.47 78.0664  10
  -6   4   0 3086.17 76.4357  15
   6   4   0 3216.56 76.3007   7
   6  -4   0 3222.24 76.1694   7
   6  -4  -1 16.2766 7.20318   5
  -6  -4   1 32.1502 10.1629  10
  -6  -4  -1 14.0419 9.84506  10
  -6   4   1 25.2758 8.21714  10
   6   4   1 35.7709 7.42740   1
  -6   4  -1 25.3666 7.57489  15
   6   4   1 29.7655 7.00692   7
   6  -4   1 26.7877 6.76230   7
  -6   4   2 90.0073 9.83511  10
  -6  -4   2 90.9211 12.0739  10
  -6  -4  -2 80.4273 10.8866  10
   6  -4   2 80.9441 9.01275   5
   6   4   2 93.5460 8.55064   1
  -6   4  -2 91.4762 9.22926  15
   6   4   2 87.3957 8.91187   7
   6  -4   2 88.3515 8.69018   7
   6  -4  -2 102.464 13.4983  22
   6  -4  -2 94.8468 8.74467   5
  -6   4  -3 108.396 10.6876  10
  -6  -4   3 103.151 14.0392  10
  -6  -4  -3 85.9131 11.6958  10
   6   4   3 92.0731 8.96464   7
   6   4   3 79.1869 8.94109   1
   6  -4  -3 103.188 14.1662  22
  -6  -5   0 183.156 13.0865  10
   6  -5   0 164.531 10.8634   5
  -6   5   0 168.747 10.1239  15
   6   5   0 164.860 9.63063   7
   6  -5  -1 276.272 12.6552   5
  -6  -5   1 306.122 15.7241  10
  -6  -5  -1 290.673 15.3753  10
   6  -5   1 316.475 13.6976   5
   6   5   1 264.835 12.6727   1
  -6   5  -1 285.995 13.2736  15
   6   5  -1 284.814 13.1608   7
   6   5   1 289.836 12.3155   7
   6  -5   1 282.541 12.8799   7
  -6  -5   2 142.821 13.8585  10
   6   5   2 113.108 11.7823  19
  -6   5   2 116.719 9.90869  10
  -6  -5  -2 113.611 12.1583  10
   6   5   2 114.147 8.78246   1
  -6   5  -2 121.195 9.84734  15
   6   5   2 115.840 8.70473   7
   6  -5   2 130.657 10.2884   7
   6  -5  -2 124.263 14.7728  22
   6  -5  -2 112.423 9.28967   5
  -6  -5   3 441.565 20.2329  10
   6   5   3 424.099 15.8150   7
  -6   5  -3 431.972 17.3167  25
  -6  -6   0 890.643 29.3876  10
   6  -6   0 891.342 26.3131   5
  -6   6   0 859.407 25.8126  15
   6   6   0 818.528 25.1597   7
   6   6   1 5.73338 6.75270   1
  -6  -6   1-9.45960 13.1632  10
  -6  -6  -1-2.79245 11.3103  10
   6  -6  -1 1.46329 7.15027   5
   6   6  -1 3.53649 7.31496   7
   6   6   1-5.38666 7.42223   7
   6  -6  -1-12.5336 12.5758  22
  -6  -6   2 80.8595 14.4680  10
   6   6   2 64.0018 12.0164  19
   6   6   2 66.2338 8.35230   7
   6  -6  -2 86.9133 13.4227  22
  -6   7   0 43.7083 8.02378  15
   6   7   0 47.0146 8.55541   7
   6   7   1 22.3188 7.89376   7
   0   0   0    0.00    0.00   0

TITL MY_DIAMOND_1_inc_1_DC in Pbnm
REM Pbnm (#62 with fixed user cell!)
CELL 0.71073   4.760167  10.214649   5.990762  90.0000  90.0000  90.0000
ZERR    2.00   0.000180   0.000390   0.000252   0.0000   0.0000   0.0000
LATT  1
SYMM -x, y+1/2,-z+1/2
SYMM  x+1/2,-y,-z
SYMM -x+1/2,-y+1/2, z+1/2
SFAC O Mg Si Fe
UNIT 8.00 3.70 2.00 0.30
TREF
HKLF 4
END
;
_shelx_hkl_checksum   58466
