# Supplementary material for: In situ single-crystal X-ray diffraction of olivine inclusion in diamond from Shandong, China: implications for the depth of diamond formation
Source: Copernicus journal article supplement (doi:10.5194/ejm-35-361-2023), 2023-05-31
Supplement: Supplementary file 1 [file ejm-35-361-2023-supplement.zip › released_rev_edited.cif]

 
data_changma_olivine_released
 
_audit_creation_method            'SHELXL-2018/3'
_shelx_SHELXL_version_number      '2018/3'
_chemical_name_systematic         ?
_chemical_name_common             ?
_chemical_melting_point           ?
_chemical_formula_moiety          ?
_chemical_formula_sum
 'Fe0.171 Mg1.829 O4 Si1' 
_chemical_formula_weight          146.04

loop_
 _atom_type_symbol
 _atom_type_description
 _atom_type_scat_dispersion_real
 _atom_type_scat_dispersion_imag
 _atom_type_scat_source
 'Mg'  'Mg2+'   0.0420   0.0360
 'International Tables Vol C Tables 4.2.6.8 and 6.1.1.4'
 'Si'  'Si4+'   0.0720   0.0710
 'International Tables Vol C Tables 4.2.6.8 and 6.1.1.4'
 'Fe'  'Fe2+'   0.3010   0.8450
 'International Tables Vol C Tables 4.2.6.8 and 6.1.1.4'
 'O'  'O2-'   0.0080   0.0060
 'International Tables Vol C Tables 4.2.6.8 and 6.1.1.4'
 'O'  'O'   0.0106   0.0060
 'International Tables Vol C Tables 4.2.6.8 and 6.1.1.4'
 'Si'  'Si'   0.0817   0.0704
 'International Tables Vol C Tables 4.2.6.8 and 6.1.1.4'

 
_space_group_crystal_system       orthorhombic
_space_group_IT_number            62
_space_group_name_H-M_alt         Pbnm
_space_group_name_Hall            -P2c2ab
 
_shelx_space_group_comment
;
The symmetry employed for this shelxl refinement is uniquely defined
by the following loop, which should always be used as a source of
symmetry information in preference to the above space-group names.
They are only intended as comments.
;
 
loop_
 _space_group_symop_operation_xyz
 'x, y, z'
 '-x, -y, z+1/2'
 'x+1/2, -y+1/2, -z'
 '-x+1/2, y+1/2, -z+1/2'
 '-x, -y, -z'
 'x, y, -z-1/2'
 '-x-1/2, y-1/2, z'
 'x-1/2, -y-1/2, z-1/2'
 
_cell_length_a                    4.7665(8)
_cell_length_b                    10.2378(10)
_cell_length_c                    6.0020(7)
_cell_angle_alpha                 90
_cell_angle_beta                  90
_cell_angle_gamma                 90
_cell_volume                      292.89(7)
_cell_formula_units_Z             4
_cell_measurement_temperature     293(2)
_cell_measurement_reflns_used     2031
_cell_measurement_theta_min       3
_cell_measurement_theta_max       31.5
 
_exptl_crystal_description        irregular
_exptl_crystal_colour             colorless
_exptl_crystal_density_meas       ?
_exptl_crystal_density_method     ?
_exptl_crystal_density_diffrn     3.312         
_exptl_crystal_F_000              290
__exptl_transmission_factor_min    0.812
_exptl_transmission_factor_max    0.910
_exptl_crystal_size_max           0.110
_exptl_crystal_size_mid           0.050
_exptl_crystal_size_min           0.050
_exptl_absorpt_coefficient_mu     1.827
_shelx_estimated_absorpt_T_min    ?
_shelx_estimated_absorpt_T_max    ?
_exptl_absorpt_correction_type    multi-scan
_exptl_absorpt_correction_T_min   0.548
_exptl_absorpt_correction_T_max   1.000
_exptl_absorpt_process_details    ?
_exptl_absorpt_special_details    ?
_diffrn_ambient_temperature       293(2)
_diffrn_radiation_wavelength      0.71073
_diffrn_radiation_type            MoK\a
_diffrn_source                    'micro-focus sealed X-ray tube'
_diffrn_measurement_device_type   'SuperNova (Mo) X-ray Source'
_diffrn_measurement_method        '\w scans'
_diffrn_detector_area_resol_mean  ?
_diffrn_reflns_number             4090
_diffrn_reflns_av_unetI/netI      0.0154
_diffrn_reflns_av_R_equivalents   0.0341
_diffrn_reflns_limit_h_min        -6
_diffrn_reflns_limit_h_max        6
_diffrn_reflns_limit_k_min        -15
_diffrn_reflns_limit_k_max        14
_diffrn_reflns_limit_l_min        -8
_diffrn_reflns_limit_l_max        8
_diffrn_reflns_theta_min          3.981
_diffrn_reflns_theta_max          31.738
_diffrn_reflns_theta_full         25.242
_diffrn_measured_fraction_theta_max   0.950
_diffrn_measured_fraction_theta_full  0.986
_diffrn_reflns_Laue_measured_fraction_max    0.950
_diffrn_reflns_Laue_measured_fraction_full   0.986
_diffrn_reflns_point_group_measured_fraction_max   0.950
_diffrn_reflns_point_group_measured_fraction_full  0.986
_reflns_number_total              513
_reflns_number_gt                 491
_reflns_threshold_expression      'I > 2\s(I)'
_reflns_Friedel_coverage          0.000
_reflns_Friedel_fraction_max      .
_reflns_Friedel_fraction_full     .
 
_reflns_special_details
;
 Reflections were merged by SHELXL according to the crystal
 class for the calculation of statistics and refinement.
 
 _reflns_Friedel_fraction is defined as the number of unique
 Friedel pairs measured divided by the number that would be
 possible theoretically, ignoring centric projections and
 systematic absences.
;
 
_computing_data_collection        ?
_computing_cell_refinement        ?
_computing_data_reduction         ?
_computing_structure_solution     ?
_computing_structure_refinement 'SHELXL-2018/3 (Sheldrick, 2018)'
_computing_molecular_graphics     ?
_computing_publication_material   ?
_refine_special_details           ?
_refine_ls_structure_factor_coef  Fsqd
_refine_ls_matrix_type            full
_refine_ls_weighting_scheme       calc
_refine_ls_weighting_details
'w=1/[\s^2^(Fo^2^)+(0.0246P)^2^+0.0680P] where P=(Fo^2^+2Fc^2^)/3'
_atom_sites_solution_primary      ?
_atom_sites_solution_secondary    ?
_atom_sites_solution_hydrogens    .
_refine_ls_hydrogen_treatment     undef
_refine_ls_extinction_method      'SHELXL-2018/3 (Sheldrick 2018)'
_refine_ls_extinction_coef        0.000(3)
_refine_ls_extinction_expression
 'Fc^*^=kFc[1+0.001xFc^2^\l^3^/sin(2\q)]^-1/4^'
_refine_ls_number_reflns          513
_refine_ls_number_parameters      53
_refine_ls_number_restraints      6
_refine_ls_R_factor_all           0.0147
_refine_ls_R_factor_gt            0.0138
_refine_ls_wR_factor_ref          0.0382
_refine_ls_wR_factor_gt           0.0377
_refine_ls_goodness_of_fit_ref    1.007
_refine_ls_restrained_S_all       1.003
_refine_ls_shift/su_max           0.667
_refine_ls_shift/su_mean          0.125
 
loop_
 _atom_site_label
 _atom_site_type_symbol
 _atom_site_fract_x
 _atom_site_fract_y
 _atom_site_fract_z
 _atom_site_U_iso_or_equiv
 _atom_site_adp_type
 _atom_site_occupancy
 _atom_site_site_symmetry_order  
 _atom_site_calc_flag
 _atom_site_refinement_flags_posn
 _atom_site_refinement_flags_adp
 _atom_site_refinement_flags_occupancy
 _atom_site_disorder_assembly
 _atom_site_disorder_group
SiA Si 0.42667(6) 0.09431(3) 0.250000 0.00447(11) Uani 0.632(16) 2 d S T P . .
SiB Si4+ 0.42667(6) 0.09431(3) 0.250000 0.00447(11) Uani 0.368(16) 2 d S T P . .
Fe2 Fe2+ 0.99026(7) 0.27763(3) 0.250000 0.00632(14) Uani 0.081(2) 2 d S T P . .
Mg2 Mg2+ 0.99026(7) 0.27763(3) 0.250000 0.00632(14) Uani 0.919(3) 2 d S T P . .
Fe1 Fe2+ 0.000000 0.000000 0.000000 0.00636(13) Uani 0.090(2) 2 d S . P . .
Mg1 Mg2+ 0.000000 0.000000 0.000000 0.00636(13) Uani 0.910(3) 2 d S . P . .
O1A O 0.76607(17) 0.09168(7) 0.250000 0.00605(17) Uani 0.28(2) 2 d S T P . .
O1B O2- 0.76607(17) 0.09168(7) 0.250000 0.00605(17) Uani 0.72(2) 2 d S T P . .
O2A O 0.22055(16) 0.44761(7) 0.250000 0.00601(16) Uani 0.27(2) 2 d S T P . .
O2B O2- 0.22055(16) 0.44761(7) 0.250000 0.00601(16) Uani 0.73(2) 2 d S T P . .
O3A O 0.27828(11) 0.16320(5) 0.03326(9) 0.00642(14) Uani 0.248(19) 1 d . . P . .
O3B O2- 0.27828(11) 0.16320(5) 0.03326(9) 0.00642(14) Uani 0.752(19) 1 d . . P . .
 
loop_
 _atom_site_aniso_label
 _atom_site_aniso_U_11
 _atom_site_aniso_U_22
 _atom_site_aniso_U_33
 _atom_site_aniso_U_23
 _atom_site_aniso_U_13
 _atom_site_aniso_U_12
SiA 0.00368(16) 0.00441(16) 0.00533(15) 0.000 0.000 0.00014(9)
SiB 0.00368(16) 0.00441(16) 0.00533(15) 0.000 0.000 0.00014(9)
Fe2 0.0068(2) 0.00527(19) 0.00686(19) 0.000 0.000 0.00005(11)
Mg2 0.0068(2) 0.00527(19) 0.00686(19) 0.000 0.000 0.00005(11)
Fe1 0.0057(2) 0.00748(18) 0.00593(18) -0.00114(12) -0.00054(11) -0.00003(11)
Mg1 0.0057(2) 0.00748(18) 0.00593(18) -0.00114(12) -0.00054(11) -0.00003(11)
O1A 0.0043(3) 0.0071(3) 0.0067(3) 0.000 0.000 0.0002(2)
O1B 0.0043(3) 0.0071(3) 0.0067(3) 0.000 0.000 0.0002(2)
O2A 0.0060(3) 0.0047(3) 0.0073(3) 0.000 0.000 0.0002(3)
O2B 0.0060(3) 0.0047(3) 0.0073(3) 0.000 0.000 0.0002(3)
O3A 0.0057(3) 0.0070(2) 0.0066(2) 0.00125(18) -0.00032(19) 0.00033(18)
O3B 0.0057(3) 0.0070(2) 0.0066(2) 0.00125(18) -0.00032(19) 0.00033(18)
 
_geom_special_details
;
 All esds (except the esd in the dihedral angle between two l.s. planes)
 are estimated using the full covariance matrix.  The cell esds are taken
 into account individually in the estimation of esds in distances, angles
 and torsion angles; correlations between esds in cell parameters are only
 used when they are defined by crystal symmetry.  An approximate (isotropic)
 treatment of cell esds is used for estimating esds involving l.s. planes.
;
 
loop_
 _geom_bond_atom_site_label_1
 _geom_bond_atom_site_label_2
 _geom_bond_distance
 _geom_bond_site_symmetry_2
 _geom_bond_publ_flag
SiA O1A 1.6180(9) . ?
SiA O3A 1.6401(6) 6_556 ?
SiA O3A 1.6401(6) . ?
SiA O2A 1.6577(8) 7_655 ?
SiA Fe1 2.7055(4) . ?
SiA Fe1 2.7055(4) 2 ?
SiA Fe2 2.8017(5) 1_455 ?
SiA Mg2 3.2662(5) 7_755 ?
Fe2 O2A 2.0575(8) 1_655 ?
Fe2 O3A 2.0684(6) 3 ?
Fe2 O3A 2.0684(6) 8_666 ?
Fe2 O1A 2.1831(8) . ?
Fe2 O3A 2.2247(6) 6_656 ?
Fe2 O3A 2.2247(6) 1_655 ?
Fe1 O2A 2.0769(6) 7_655 ?
Fe1 O2A 2.0769(6) 3_455 ?
Fe1 O1A 2.0919(6) 5_655 ?
Fe1 O1A 2.0919(6) 1_455 ?
Fe1 O3A 2.1427(6) . ?
Fe1 O3A 2.1427(6) 5 ?
 
loop_
 _geom_angle_atom_site_label_1
 _geom_angle_atom_site_label_2
 _geom_angle_atom_site_label_3
 _geom_angle
 _geom_angle_site_symmetry_1
 _geom_angle_site_symmetry_3
 _geom_angle_publ_flag
O1A SiA O3A 116.00(3) . 6_556 ?
O1A SiA O3A 116.00(3) . . ?
O3A SiA O3A 104.96(4) 6_556 . ?
O1A SiA O2A 114.09(4) . 7_655 ?
O3A SiA O2A 101.95(3) 6_556 7_655 ?
O3A SiA O2A 101.95(3) . 7_655 ?
O1A SiA Fe1 138.214(18) . . ?
O3A SiA Fe1 105.62(3) 6_556 . ?
O3A SiA Fe1 52.37(2) . . ?
O2A SiA Fe1 50.094(19) 7_655 . ?
O1A SiA Fe1 138.214(18) . 2 ?
O3A SiA Fe1 52.37(2) 6_556 2 ?
O3A SiA Fe1 105.62(3) . 2 ?
O2A SiA Fe1 50.094(19) 7_655 2 ?
Fe1 SiA Fe1 67.368(12) . 2 ?
O1A SiA Fe2 138.90(3) . 1_455 ?
O3A SiA Fe2 52.54(2) 6_556 1_455 ?
O3A SiA Fe2 52.54(2) . 1_455 ?
O2A SiA Fe2 107.02(3) 7_655 1_455 ?
Fe1 SiA Fe2 71.396(12) . 1_455 ?
Fe1 SiA Fe2 71.396(12) 2 1_455 ?
O1A SiA Mg2 82.08(3) . 7_755 ?
O3A SiA Mg2 118.63(2) 6_556 7_755 ?
O3A SiA Mg2 118.63(2) . 7_755 ?
O2A SiA Mg2 32.01(3) 7_655 7_755 ?
Fe1 SiA Mg2 74.744(9) . 7_755 ?
Fe1 SiA Mg2 74.744(9) 2 7_755 ?
Fe2 SiA Mg2 139.022(13) 1_455 7_755 ?
O2A Fe2 O3A 90.74(2) 1_655 3 ?
O2A Fe2 O3A 90.74(2) 1_655 8_666 ?
O3A Fe2 O3A 110.56(4) 3 8_666 ?
O2A Fe2 O1A 177.06(3) 1_655 . ?
O3A Fe2 O1A 90.93(2) 3 . ?
O3A Fe2 O1A 90.93(2) 8_666 . ?
O2A Fe2 O3A 96.67(3) 1_655 6_656 ?
O3A Fe2 O3A 159.44(3) 3 6_656 ?
O3A Fe2 O3A 88.569(15) 8_666 6_656 ?
O1A Fe2 O3A 80.96(3) . 6_656 ?
O2A Fe2 O3A 96.67(3) 1_655 1_655 ?
O3A Fe2 O3A 88.569(15) 3 1_655 ?
O3A Fe2 O3A 159.44(3) 8_666 1_655 ?
O1A Fe2 O3A 80.96(3) . 1_655 ?
O3A Fe2 O3A 71.57(3) 6_656 1_655 ?
O2A Fe2 SiA 99.82(3) 1_655 1_655 ?
O3A Fe2 SiA 123.977(17) 3 1_655 ?
O3A Fe2 SiA 123.977(17) 8_666 1_655 ?
O1A Fe2 SiA 77.25(3) . 1_655 ?
O3A Fe2 SiA 35.815(15) 6_656 1_655 ?
O3A Fe2 SiA 35.815(15) 1_655 1_655 ?
O2A Fe1 O2A 180.00(4) 7_655 3_455 ?
O2A Fe1 O1A 93.47(2) 7_655 5_655 ?
O2A Fe1 O1A 86.53(2) 3_455 5_655 ?
O2A Fe1 O1A 86.53(2) 7_655 1_455 ?
O2A Fe1 O1A 93.47(2) 3_455 1_455 ?
O1A Fe1 O1A 180.00(5) 5_655 1_455 ?
O2A Fe1 O3A 74.75(3) 7_655 . ?
O2A Fe1 O3A 105.25(3) 3_455 . ?
O1A Fe1 O3A 94.98(3) 5_655 . ?
O1A Fe1 O3A 85.02(3) 1_455 . ?
O2A Fe1 O3A 105.25(3) 7_655 5 ?
O2A Fe1 O3A 74.75(3) 3_455 5 ?
O1A Fe1 O3A 85.02(3) 5_655 5 ?
O1A Fe1 O3A 94.98(3) 1_455 5 ?
O3A Fe1 O3A 180.0 . 5 ?
O2A Fe1 SiA 142.25(2) 7_655 5 ?
O2A Fe1 SiA 37.75(2) 3_455 5 ?
O1A Fe1 SiA 80.95(2) 5_655 5 ?
O1A Fe1 SiA 99.05(2) 1_455 5 ?
O3A Fe1 SiA 142.684(15) . 5 ?
O3A Fe1 SiA 37.316(15) 5 5 ?
O2A Fe1 SiA 37.75(2) 7_655 . ?
O2A Fe1 SiA 142.25(2) 3_455 . ?
O1A Fe1 SiA 99.05(2) 5_655 . ?
O1A Fe1 SiA 80.95(2) 1_455 . ?
O3A Fe1 SiA 37.315(15) . . ?
O3A Fe1 SiA 142.685(15) 5 . ?
SiA Fe1 SiA 180.0 5 . ?
SiA O1A Fe1 122.71(3) . 2_655 ?
SiA O1A Fe1 122.71(3) . 1_655 ?
Fe1 O1A Fe1 91.67(3) 2_655 1_655 ?
SiA O1A Fe2 118.35(4) . . ?
Fe1 O1A Fe2 97.49(3) 2_655 . ?
Fe1 O1A Fe2 97.49(3) 1_655 . ?
SiA O2A Fe2 122.72(5) 7_665 1_455 ?
SiA O2A Fe1 92.15(3) 7_665 4 ?
Fe2 O2A Fe1 124.10(2) 1_455 4 ?
SiA O2A Fe1 92.15(3) 7_665 3 ?
Fe2 O2A Fe1 124.10(2) 1_455 3 ?
Fe1 O2A Fe1 92.52(3) 4 3 ?
SiA O3A Fe2 124.56(4) . 3_455 ?
SiA O3A Fe1 90.32(2) . . ?
Fe2 O3A Fe1 117.01(3) 3_455 . ?
SiA O3A Fe2 91.65(3) . 1_455 ?
Fe2 O3A Fe2 128.89(2) 3_455 1_455 ?
Fe1 O3A Fe2 94.77(3) . 1_455 ?
 
_refine_diff_density_max    0.324
_refine_diff_density_min   -0.284
_refine_diff_density_rms    0.059

_shelx_res_file
;
TITL MY_DIAMOND_1_inc_1_released_DC
    shelx.res
    created by SHELXL-2018/3 at 12:08:12 on 04-May-2023
CELL   0.71073    4.7665  10.2378   6.002   90.000   90.000   90.000
ZERR         4      0.0008    0.001    0.0007    0.000    0.000    0.000
LATT  1
SYMM -X,-Y,1/2+Z
SYMM 1/2+X,1/2-Y,-Z
SYMM 1/2-X,1/2+Y,1/2-Z
SFAC O SI
SFAC MG+2  3.4988 2.1676 3.8378 4.7542 1.3284 .185 .8497 =
   10.1411  .4853   .0420  .0360  165.  1.60  24.305
SFAC SI+4 4.43918  1.64167 3.20345  3.43757 1.19453  .2149  .416530 =
    6.65365   .746297 .0720 .0710  310.  1.17   28.0855
SFAC FE+2  11.0424  4.6538  7.374  .3053  4.1346 12.0546  .4399 =
   31.2809  1.0097  .3010 .8450  3490.  1.24   55.847
SFAC O-2    2.5371  5.7271  4.3991  17.17999  1.9535  .2189  1.2957  =
   44.606  -.205  .0080  .0060  32.5  .66  15.9994
UNIT 1 1 1 1 1 1
L.S.      10
SHEL 999 0.55
ACTA
FMAP      2
BOND 0.5
PLAN     25
OMIT 0 0 4
OMIT 1 9 1
OMIT 1 1 4
OMIT 4 0 0
SUMP 1.0 0.001 1 2 1 3
SUMP 1.0 0.001 1 4 1 5
SUMP 1.0 0.001 1 6 1 7
SUMP 1.0 0.001 1 8 1 9
SUMP 1.0 0.001 1 10 1 11
SUMP 1.0 0.001 1 12 1 13
WGHT    0.024600    0.068000
EXTI    0.000018
FVAR       1.11333   0.63035   0.36842   0.08133   0.91867   0.09017   0.90974
FVAR       0.27863   0.72219   0.27308   0.72716   0.24776   0.75244
SIA   2    0.426665    0.094314    0.250000    20.50000    0.00368    0.00441 =
         0.00533    0.00000    0.00000    0.00014
SIB   4    0.426665    0.094314    0.250000    30.50000    0.00368    0.00441 =
         0.00533    0.00000    0.00000    0.00014
FE2   5    0.990257    0.277631    0.250000    40.50000    0.00682    0.00527 =
         0.00686    0.00000    0.00000    0.00005
MG2   3    0.990257    0.277631    0.250000    50.50000    0.00682    0.00527 =
         0.00686    0.00000    0.00000    0.00005
FE1   5    0.000000    0.000000    0.000000    60.50000    0.00566    0.00748 =
         0.00593   -0.00114   -0.00054   -0.00003
MG1   3    0.000000    0.000000    0.000000    70.50000    0.00566    0.00748 =
         0.00593   -0.00114   -0.00054   -0.00003
O1A   1    0.766067    0.091682    0.250000    80.50000    0.00434    0.00709 =
         0.00671    0.00000    0.00000    0.00021
O1B   6    0.766067    0.091682    0.250000    90.50000    0.00434    0.00709 =
         0.00671    0.00000    0.00000    0.00021
O2A   1    0.220547    0.447613    0.250000   100.50000    0.00596    0.00473 =
         0.00734    0.00000    0.00000    0.00022
O2B   6    0.220547    0.447613    0.250000   110.50000    0.00596    0.00473 =
         0.00734    0.00000    0.00000    0.00022
O3A   1    0.278281    0.163204    0.033260   121.00000    0.00568    0.00698 =
         0.00659    0.00125   -0.00032    0.00033
O3B   6    0.278281    0.163204    0.033260   131.00000    0.00568    0.00698 =
         0.00659    0.00125   -0.00032    0.00033
EXYZ Fe2 Mg2
EADP Fe2 Mg2
EXYZ Fe1 Mg1
EADP Fe1 Mg1
EXYZ O1A O1B
EADP O1A O1B
EXYZ O2A O2B
EADP O2A O2B
EXYZ O3A O3B
EADP O3A O3B
EXYZ SiA SiB
EADP SiA SiB
HKLF      4


REM  MY_DIAMOND_1_inc_1_released_DC
REM wR2 = 0.0382, GooF = S = 1.007, Restrained GooF = 1.003 for all data
REM R1 = 0.0138 for 491 Fo > 4sig(Fo) and 0.0147 for all 513 data
REM 53 parameters refined using 6 restraints

END

WGHT      0.0157      0.0757

REM Highest difference peak  0.324,  deepest hole -0.284,  1-sigma level  0.059
Q1    1   0.3408  0.1191  0.1263  11.00000  0.05    0.32
Q2    1   0.6095  0.0791  0.2500  10.50000  0.05    0.31
Q3    1   0.1772  0.5002  0.3173  11.00000  0.05    0.26
Q4    1   0.5834  0.1003  0.3231  11.00000  0.05    0.19
Q5    1   0.4927  0.3036  0.2500  10.50000  0.05    0.17
Q6    1   1.0036  0.2244  0.3610  11.00000  0.05    0.17
Q7    1  -0.0505 -0.0917 -0.0567  11.00000  0.05    0.15
Q8    1   0.7312  0.3368  0.2500  10.50000  0.05    0.15
Q9    1   0.3593  0.2141 -0.1002  11.00000  0.05    0.15
Q10   1   1.0056  0.0068  0.2500  10.50000  0.05    0.15
Q11   1   1.1047  0.3110  0.3213  11.00000  0.05    0.15
Q12   1   0.0053  0.0595 -0.1081  11.00000  0.05    0.14
Q13   1  -0.1521  0.0010 -0.0713  11.00000  0.05    0.14
Q14   1   0.0409  0.3957  0.2500  10.50000  0.05    0.14
Q15   1   0.4381  0.1768 -0.0624  11.00000  0.05    0.14
Q16   1   0.4699  0.2409  0.0152  11.00000  0.05    0.14
Q17   1   0.0656  0.1147 -0.0638  11.00000  0.05    0.14
Q18   1   0.4636  0.1136  0.0432  11.00000  0.05    0.13
Q19   1   0.3658  0.4982  0.3480  11.00000  0.05    0.13
Q20   1   0.0017  0.0542  0.1235  11.00000  0.05    0.13
Q21   1  -0.1514 -0.0593  0.0278  11.00000  0.05    0.13
Q22   1  -0.0676  0.1014  0.0240  11.00000  0.05    0.13
Q23   1  -0.1435 -0.0035  0.1468  11.00000  0.05    0.13
Q24   1   0.1926  0.2803 -0.0422  11.00000  0.05    0.12
Q25   1   0.2600  0.1753  0.2500  10.50000  0.05    0.12
;
_shelx_res_checksum   15911

_shelx_hkl_file
;
   0   0  -1 0.37487 0.46005  23
   0   0  -1 1.32721 0.42677   8
   0   0   1 0.23677 0.42944  19
   0   0  -1-0.11581 0.60467  25
   0   0   1 0.55248 0.48093  18
   0   0   2 2506.92 64.8342  19
   0   0  -2 2402.82 64.6213   8
   0   0  -2 2466.72 64.0809  10
   0   0   2 2483.54 65.0005  20
   0   0  -2 2292.23 64.7388  23
   0   0   2 2142.91 64.1748   2
   0   0  -2 2037.33 65.2629  25
   0   0   2 2359.07 64.5630  11
   0   0   2 2328.51 65.0520   1
   0   0   2 2335.07 64.9453  18
   0   0   3 0.39964 1.15153   1
   0   0  -3 0.13840 1.44099  25
   0   0  -3-0.11867 0.80757  21
   0   0   3 0.87646 0.84110  19
   0   0  -3 0.28870 0.69814   8
   0   0  -3 0.51925 0.71472  23
   0   0  -4 21756.9 588.033   8
   0   0  -4 20822.5 588.002  23
   0   0  -4 22724.0 588.675  21
   0   0   4 20820.8 588.286  19
   0   0   4 23022.2 588.709  18
   0   0   4 20642.5 589.573   1
   0   0  -5 0.21082 1.18462  21
   0   0   5-0.29333 1.95015   1
   0   0   5 1.44630 1.18018  18
   0   0  -5 0.17990 1.09191  23
   0   0  -6 1266.46 39.5850  23
   0   0  -6 1359.83 40.6455  21
   0   0   6 1306.42 44.7166   1
   0   0   7 1.36757 1.60727  19
   0   0  -7-0.62664 1.84642  21
   0   0  -8 3278.69 94.0161  21
   0   0   8 3105.99 94.4679  19
   0   1   0 0.01929 0.25343  16
   0  -1   1 0.08890 0.57137  19
   0   1  -1 0.42596 0.53886  21
   0   1  -1-0.02350 0.35753  23
   0   1   1 0.03600 0.37480  19
   0  -1   1 0.29325 0.48432   4
   0  -1   1 0.27413 0.46635  18
   0  -1  -1 0.43586 0.48158  10
   0  -1  -1-0.66639 0.64965  23
   0   1  -2 0.28254 0.56517  23
   0  -1  -2 0.72003 0.65446  10
   0   1  -2-0.07750 0.78312  21
   0   1  -2 1.93215 0.76058   8
   0  -1   2-0.16933 0.65585  18
   0   1   2 0.14503 0.62254  19
   0  -1  -2-0.16619 0.72343  23
   0   1   2 0.13324 0.70375  11
   0   1   2-0.40799 1.11234   1
   0   1  -2 0.07804 0.87712  25
   0  -1   2-0.23890 0.82516  19
   0   1   2 0.44820 0.65037  18
   0   1  -3 0.11854 0.80674  21
   0   1   3 0.54516 1.16982   1
   0  -1  -3 0.34986 0.58326  10
   0   1   3 0.29843 0.84775  11
   0   1  -3 0.75194 0.92993  15
   0   1  -3 1.22456 1.21799  25
   0   1  -3 0.64355 0.65105   8
   0   1   3-0.11329 0.72586  19
   0  -1  -3-0.23476 0.80783  23
   0  -1   3 0.50525 0.81960  18
   0   1  -3 0.72789 0.66666  23
   0   1   3 1.34570 0.78876  18
   0  -1   3-0.74119 1.79219   1
   0   1   3-0.21458 0.90097  20
   0   1   4 1.28153 1.10287  20
   0   1   4 1.24651 0.86734  11
   0   1   4-0.30419 0.81081  19
   0   1  -4 0.12630 0.85949  23
   0   1  -4 0.80498 1.01815  21
   0   1  -4-0.18100 1.70179  25
   0   1  -4 0.28212 0.80575   8
   0  -1  -4 0.16588 1.02106  21
   0  -1  -4 0.62605 1.04059  23
   0   1   4-0.17837 1.45238   1
   0   1   4 0.30494 0.88487  18
   0   1   5-0.82770 1.03993  19
   0  -1   5-0.21966 1.25463  19
   0   1   5-0.69587 1.66566   1
   0   1  -5 0.18453 1.15144   8
   0  -1   5 1.09009 1.14041  18
   0   1   5 0.39204 1.00542  18
   0   1  -5 0.32611 1.10954  23
   0  -1  -5-0.19787 1.14825  23
   0   1  -5 0.20644 1.17910  21
   0   1   6 1.45914 1.24749  18
   0   1   6 2.70866 2.02462   1
   0   1  -6 1.52991 1.52532  21
   0   1   6-0.79483 1.56141  19
   0  -1   6 0.55540 1.50752  19
   0  -1  -6 0.24015 1.32676  23
   0   1  -7 0.30572 1.56812  21
   0  -1  -7 0.28424 1.48682  23
   0  -1   7-0.68776 1.83304  19
   0   1  -8-0.36150 2.25574  21
   0  -1   8 0.85760 2.15499  19
   0   2   0 1152.35 32.0115  16
   0   2  -1 2530.07 71.5161  21
   0  -2  -1 2781.28 72.1925  10
   0   2   1 2599.43 71.4866  13
   0  -2   1 2761.47 71.9386   4
   0  -2  -1 2661.77 72.0062  23
   0   2  -1 2554.46 71.0682  12
   0   2  -2 153.982 5.73740  21
   0  -2  -2 173.040 6.00065  10
   0  -2  -2 157.198 6.13334  23
   0   2   2 162.765 5.74823  11
   0   2   2 175.635 5.87244  19
   0   2  -2 158.604 5.28484  23
   0   2  -3 52.8791 3.18098   8
   0   2  -3 40.3560 3.15797  25
   0   2  -3 50.1231 3.06898  21
   0   2   3 58.2585 3.15233  18
   0   2   3 56.6112 3.04202  11
   0   2  -3 49.0446 2.59971  23
   0  -2  -3 53.3684 3.30167  23
   0  -2   3 54.6300 3.29408  19
   0   2   3 52.8656 3.82817   1
   0  -2   3 56.1950 3.32305  18
   0   2  -3 57.3529 2.97436  15
   0   2   3 55.7629 3.09654  19
   0  -2  -3 50.1674 2.80231  10
   0  -2  -4 573.911 18.3275  21
   0   2   4 573.816 17.8804  18
   0   2  -4 506.546 17.0475  23
   0   2   4 592.127 17.9050  20
   0   2  -4 522.135 18.1775  25
   0   2  -4 553.665 18.0152   8
   0  -2  -4 564.735 18.1961  23
   0   2   4 591.103 18.1953  19
   0  -2   4 532.112 18.1762  19
   0   2  -4 550.376 17.9852  21
   0   2   4 504.308 18.5654   1
   0   2   4 589.185 17.8715  11
   0  -2  -5 1465.15 42.2239  21
   0  -2   5 1412.29 42.2713  19
   0   2   5 1434.22 40.9492  11
   0  -2  -5 1367.05 41.7707  23
   0   2   5 1415.95 41.5069  18
   0   2   5 1525.29 41.2882  20
   0   2  -5 1376.38 41.4627   8
   0   2  -5 1378.00 41.5444  21
   0   2   5 1366.26 41.4464  19
   0  -2  -6 404.577 15.1882  21
   0  -2  -6 366.822 14.6111  23
   0  -2   6 379.594 15.2380  19
   0   2  -6 347.605 14.3251  21
   0   2   6 398.312 14.4963  18
   0   2   6 389.173 15.2448   1
   0   2  -6 393.569 14.6267   8
   0   2   6 368.954 14.8925  19
   0   2   7 8.60284 2.41352  19
   0  -2   7 7.56587 2.38011  19
   0   2  -7 12.0916 2.56975  21
   0  -2  -7 8.21063 2.28522  23
   0  -2  -7 11.1362 2.58259  21
   0  -2  -8 257.320 12.4707  21
   0   2  -8 259.193 12.2766  21
   0  -2   8 240.327 12.8155  19
   0  -2  -8 221.351 11.6453  23
   0  -3   0-0.11813 0.61796  14
   0   3   0 0.68334 0.70967  16
   0   3   1-0.21570 0.70407  16
   0   3  -1 0.52174 0.57997  16
   0   3  -1 1.09597 0.28501  22
   0   3  -1 0.91852 0.49088  21
   0   3   1 0.06499 0.69649  17
   0  -3   1 0.69780 0.83838   4
   0   3  -2 0.45810 0.65072  21
   0   3  -2 0.03756 0.40244  12
   0  -3  -2-0.33632 0.81331  10
   0   3   2 1.10091 0.48225   7
   0  -3   2 0.10843 0.75454   4
   0   3   2 3.00585 0.88110  19
   0  -3  -2 0.11301 0.90556  23
   0   3   2 0.09201 0.76107  11
   0  -3   3 2.66606 1.11665  19
   0   3  -3 0.26194 0.53340  12
   0  -3  -3 0.45800 0.97816  23
   0   3   3 1.49834 0.94601  11
   0   3   3 0.73677 0.65473  19
   0  -3  -3 0.62214 0.91169  10
   0   3  -3-0.23097 0.92539  21
   0   3   3 0.31334 0.60630  18
   0   3   4-0.16784 0.89471  19
   0  -3   4 0.38689 1.06869  19
   0  -3  -4 0.37895 0.99113  23
   0   3  -4-1.30802 1.63783  25
   0   3   4 0.62319 1.28857  11
   0   3   4 0.23389 1.82729   1
   0  -3  -4 1.18868 1.15555  21
   0   3  -4-0.15712 1.04457  21
   0   3  -4 1.08735 1.06800   8
   0   3   4 0.55554 0.80601  18
   0   3  -5 0.39894 1.17550  21
   0   3   5-0.17766 1.10860  18
   0   3   5-0.65088 1.06742  19
   0   3  -5-0.21239 1.19342   8
   0  -3   5 0.73753 1.38136  19
   0  -3  -5-1.10718 1.34392  21
   0   3   5 0.25694 2.04172   1
   0  -3  -5-0.46823 1.24797  23
   0   3   5-0.18769 1.26260  11
   0   3   6 0.43787 1.10029  18
   0  -3  -6-0.54334 1.62504  21
   0   3  -6-0.75099 1.45268   8
   0   3   6 5.30690 2.36220   1
   0   3  -6 0.24876 1.48802  21
   0   3   6-0.27099 1.17945  19
   0  -3   6-0.91288 1.39602  19
   0  -3  -6-0.28126 1.44265  23
   0   3  -7 1.20174 1.77080  21
   0  -3  -7 1.62774 1.91877  23
   0   3   7 1.33611 1.87715  19
   0  -3  -7-1.95657 2.36569  21
   0  -3   7 4.43485 2.07683  19
   0   3   8-0.83148 2.66372  19
   0  -3   8 0.43658 2.14828  19
   0  -3  -8 0.37400 2.45697  21
   0  -3  -8-4.12873 2.40492  23
   0   3  -8-0.70070 2.21588  21
   0  -4   0 12.8418 1.27812  14
   0   4   0 11.1962 1.29022  16
   0   4  -1 1823.83 49.0033  16
   0  -4   1 1813.87 49.1372  14
   0  -4  -1 1702.67 49.0698  23
   0   4   1 1736.13 49.1196  16
   0  -4   1 1710.18 49.0139   9
   0   4   1 1747.92 49.0599  17
   0  -4   1 1734.86 49.2268   4
   0   4   1 1700.98 48.7171  13
   0   4   2 517.369 14.8214   7
   0  -4   2 530.633 16.5957   4
   0   4  -2 477.610 15.4336  21
   0   4   2 567.788 16.0806  19
   0  -4  -3 3501.22 95.9681  23
   0   4  -3 3219.98 94.7092  21
   0   4   3 3599.70 95.2645  19
   0   4   3 3411.62 95.1851  11
   0  -4   4 193.030 8.85829  19
   0   4   4 199.782 8.31705  11
   0   4   4 208.647 7.92548  18
   0   4  -4 219.166 9.07018   8
   0  -4  -4 199.938 8.80430  23
   0   4  -4 196.838 8.14771  21
   0   4   4 219.111 8.65360  19
   0  -4  -5 313.782 12.7148  23
   0   4  -5 283.703 11.7599  21
   0   4   5 325.499 12.4545  19
   0   4   5 313.620 11.4750  18
   0   4   5 288.495 13.5523   1
   0  -4  -5 328.153 12.4861  21
   0   4   5 352.408 12.6389  11
   0   4  -5 317.482 12.5336   8
   0  -4   5 292.671 12.5962  19
   0  -4  -6 476.493 18.2689  23
   0  -4  -6 513.259 18.1276  21
   0  -4   6 462.680 18.3466  19
   0   4   6 489.055 17.9398  19
   0   4  -6 477.092 17.8117   8
   0   4   6 483.529 16.7960  18
   0   4   6 491.086 18.5022   1
   0   4  -6 449.060 17.2243  21
   0  -4  -7 1172.86 38.2685  23
   0  -4   7 1107.02 38.5544  19
   0   4  -7 1220.41 38.0375   8
   0   4  -7 1118.98 37.1826  21
   0  -4  -7 1236.57 38.3254  21
   0   4   7 1180.90 38.1099  19
   0  -4   8 84.8859 7.42396  19
   0   4  -8 77.9620 6.30955  21
   0  -4  -8 93.2901 7.24331  23
   0  -4  -8 95.3713 7.08237  21
   0   4   8 97.2052 7.40095  19
   0   5   0-0.21831 0.79178  16
   0  -5   0 0.10063 0.68475  14
   0  -5  -1-0.10688 0.82822  23
   0  -5   1 1.48816 0.97584   9
   0  -5   1 0.99399 0.93703   4
   0   5   1 0.81076 0.76127  17
   0   5   1 1.51911 0.83956  16
   0  -5   1 1.43458 0.81677  14
   0   5  -1 0.98851 0.70416  16
   0  -5   2 2.32886 1.00875   4
   0   5  -2 1.61934 0.81525  16
   0   5   2 0.29289 0.93570  13
   0  -5  -2-0.14696 1.04588  23
   0   5   2 0.12331 0.92250  17
   0   5   3-0.16006 1.14947  11
   0  -5   3 1.29731 1.23224   4
   0   5  -3-0.22884 0.90174  21
   0   5   3 2.31323 1.07987  19
   0   5   4-0.52563 0.95322  18
   0  -5  -4 1.12619 1.24431  23
   0   5  -4 0.30852 1.16290  21
   0   5   4 0.36753 1.14671  11
   0   5   4 0.18675 1.01373  19
   0   5  -5 0.52378 1.13983   8
   0   5  -5-0.19677 1.29254  21
   0  -5  -5 0.54703 1.25483  23
   0   5   5 0.23850 1.29463  19
   0  -5  -5-0.45095 1.48107  21
   0   5   5-2.71842 2.60859   1
   0   5   5-0.47780 0.90970  18
   0   5   5-0.43574 1.41357  11
   0   5   6 2.13007 2.54936   1
   0   5  -6 0.58736 1.41317   8
   0   5   6 2.93438 1.67608  19
   0   5  -6-0.96280 1.54208  21
   0  -5  -6 0.64669 1.52011  23
   0  -5  -6-0.27570 1.59996  21
   0  -5   6-0.33859 1.66584  19
   0   5  -7-0.99497 1.76788   8
   0  -5  -7 0.32948 2.31717  21
   0   5  -7 1.73792 1.94849  21
   0   5   7 0.35228 1.73313  19
   0  -5  -7-0.74608 2.23139  23
   0  -5  -8 0.84435 2.07707  23
   0  -5  -8-1.12688 2.66974  21
   0   5  -8 1.69550 1.87338  21
   0  -6   0 13.9600 1.62827  14
   0  -6   0 15.8551 1.84448   9
   0   6   0 17.5446 1.90473  16
   0  -6   1 4656.61 127.497  14
   0  -6  -1 4646.14 127.378  23
   0   6   1 4682.53 127.840  17
   0   6  -1 4816.98 127.717  16
   0   6   1 4479.53 127.702  16
   0  -6   1 4467.06 127.586   9
   0  -6   1 4537.41 127.804   4
   0  -6  -2 16387.0 442.905  23
   0   6   2 16020.4 441.988  13
   0   6  -2 16592.2 442.471  16
   0  -6   2 16306.5 443.131   4
   0   6   2 15953.7 442.576  17
   0   6   3 2782.20 77.3922  19
   0   6  -3 2689.93 77.1416  16
   0  -6  -3 2679.65 78.1508  23
   0  -6   3 2862.74 78.4610   4
   0   6   3 2696.93 77.8476  11
   0   6   4 191.592 8.29012  19
   0   6   4 183.460 7.21231  18
   0  -6  -4 179.206 8.70054  23
   0   6   4 190.426 8.46359  11
   0  -6  -4 190.359 8.00222  21
   0  -6  -5 1884.27 52.6599  21
   0   6   5 1734.73 53.0062  19
   0   6   5 1719.87 52.5436  11
   0   6  -5 1739.66 53.4585   8
   0   6   6 3623.99 111.915   1
   0   6  -6 3813.86 110.568   8
   0   6   6 3965.82 110.521  19
   0  -6  -6 3638.46 110.680  23
   0  -6  -6 4115.91 110.011  21
   0  -6  -7 725.613 24.6855  21
   0  -6  -7 678.255 25.3314  23
   0   6   7 637.490 24.4901  19
   0   6  -7 684.404 24.8092   8
   0  -6  -8 309.972 14.3854  21
   0  -7   0-0.09521 0.79949  23
   0  -7   0 0.14563 0.87114  14
   0   7   0 0.16588 0.86771  16
   0  -7   0 0.80959 0.99663   9
   0  -7   1-0.15073 0.86095  14
   0  -7  -1-0.54339 0.97551  23
   0  -7   1 2.48084 1.30322   9
   0   7   1-1.02780 1.13885  16
   0   7  -1-0.16281 0.86787  16
   0   7   1 1.03649 1.12080  17
   0  -7   2-1.01595 1.26793   4
   0   7  -2 1.81573 1.07098  16
   0   7   2-0.28641 1.17529  13
   0  -7  -2 0.17863 1.24284  23
   0   7   2 0.71760 1.23458  17
   0  -7   3-0.24330 1.27265   4
   0  -7  -3-0.21979 1.38988  23
   0   7   3 0.87743 1.10974  19
   0   7  -3-0.34117 1.04996  16
   0   7   3 0.21674 1.38853  11
   0   7   4 1.69459 1.24846  19
   0  -7  -4 0.52688 1.29624  23
   0   7   4 1.89988 1.57899  11
   0  -7  -4-0.52547 1.34479  21
   0   7   5-0.27093 1.24298  19
   0  -7  -5-0.31487 1.54912  23
   0   7  -5-0.31155 1.31775   8
   0  -7  -5 0.90010 1.47811  21
   0   7   5 0.26444 1.58180  11
   0   7   6 2.71718 3.41388   1
   0   7  -6 1.38954 1.88572   8
   0   7   6 0.32387 1.78920  19
   0  -7  -6-1.38033 1.87857  21
   0   7  -7-0.75413 2.25553   8
   0   7   7-0.37958 2.23694  19
   0  -7  -7-0.83731 2.75006  23
   0  -8   0 196.317 8.43386   9
   0   8   0 192.421 8.39564  16
   0  -8   0 198.226 8.49037   4
   0  -8   0 189.718 7.97320  14
   0  -8   0 207.413 7.35279  23
   0   8  -1 267.364 10.6327  16
   0  -8   1 271.131 10.7112   9
   0  -8  -1 303.990 10.3130  23
   0   8   1 254.475 10.7573  16
   0   8   1 264.400 10.8203  17
   0  -8   1 280.102 10.4168  14
   0  -8  -2 631.341 20.6953  23
   0   8  -2 650.270 20.7841  16
   0   8   2 600.709 20.1642  13
   0   8   2 640.112 21.0581  17
   0  -8   2 627.678 21.3463   4
   0   8   3 839.142 27.5391  11
   0  -8  -3 825.559 27.1991  23
   0  -8   3 849.094 27.9700   4
   0   8   3 854.840 26.5701  19
   0   8  -3 835.039 26.6460  16
   0  -8  -4 178.222 8.98554  23
   0   8   4 167.023 8.64060  11
   0   8   4 175.344 8.34431  19
   0   8   5 8.49345 2.28536  11
   0   8   5 13.9672 2.56223  19
   0   8  -5 8.42307 2.38584   8
   0  -8  -5 11.0540 2.60924  23
   0   8   6 335.972 12.8215  19
   0   8  -6 315.032 13.0450   8
   0  -8  -6 334.942 13.6143  23
   0   8   7 489.605 20.0192  19
   0   8  -7 495.183 20.0545   8
   0  -9   0 0.21850 1.30754   9
   0  -9   0 2.63775 1.23819  14
   0   9   0 1.14554 1.26626  16
   0  -9   0 1.53608 1.31318   4
   0  -9   1 1.17069 1.33733   4
   0  -9   1 0.19209 1.00478  14
   0   9  -1-0.22169 1.09067  16
   0  -9  -1-0.15996 1.12495  23
   0   9   1 0.71582 1.17390  16
   0   9   1-0.20585 1.49319  13
   0  -9  -1 0.58637 1.09825  14
   0   9   1 0.23412 1.24799  17
   0  -9   1-0.44685 1.48540   9
   0   9   2 1.19157 1.52458  13
   0  -9  -2-1.02677 1.39739  23
   0   9   2 0.73513 1.54960  17
   0   9  -2 0.44714 1.14676  16
   0   9  -3 0.22812 1.26025  16
   0  -9   3 0.61826 1.84912   4
   0   9   3 0.42765 1.33430  19
   0  -9  -3-0.24984 1.49446  23
   0   9   3 0.28691 1.81438  11
   0  -9  -4 0.60280 1.82919  23
   0   9   4-0.61317 1.66423  11
   0  -9   4-1.35044 1.95918   4
   0   9   4 1.24760 1.33007  19
   0   9   5 1.31679 1.99796  11
   0  -9  -5-0.35529 2.27618  23
   0   9  -5 0.36266 1.74505   8
   0   9   5 1.19469 1.73329  19
   0   9   6-0.35734 2.04112  19
   0  -9  -6 2.46029 2.41654  23
   0   9  -6 1.19545 2.00274   8
   0 -10   0 1361.93 42.4671   9
   0 -10   0 1376.54 41.7778  14
   0  10   0 1409.77 42.9392  16
   0 -10   0 1436.83 42.8269   4
   0 -10   1 1351.85 42.7396   9
   0  10   1 1433.27 43.3940  16
   0 -10   1 1436.37 43.0740   4
   0 -10  -1 1378.23 42.7760   9
   0  10   1 1408.44 43.1339  17
   0  10   1 1428.91 42.5520  13
   0 -10   1 1394.75 41.9399  14
   0 -10  -1 1339.59 41.9784  14
   0  10  -1 1429.07 43.0104  16
   0  10  -2 230.655 10.4590  16
   0  10   2 228.568 10.7242  17
   0  10   2 240.386 10.1458  13
   0  10   3 516.802 18.5430  19
   0  10  -3 514.770 18.8429  16
   0 -10  -3 526.035 19.0390  23
   0  10   3 547.625 20.1790  11
   0 -10   3 542.495 20.4829   4
   0  10   4 983.847 33.9078  11
   0  10   4 1064.10 33.0034  19
   0 -10   4 1007.83 34.6111   4
   0 -10  -4 1034.26 33.8111  23
   0  10   5 1088.20 36.6402  11
   0  10   5 1116.93 36.1257  19
   0 -10  -5 1134.15 37.2217  23
   0  10   6 36.1306 4.48499  19
   0  10  -6 43.7342 5.15826   8
   0 -10  -6 42.1404 5.18894  23
   0  11   0-0.90003 1.56931  16
   0 -11   0-1.13906 1.91560   4
   0 -11   0 2.08078 1.46204  14
   0 -11   0 0.56324 1.65961   9
   0  11   0-0.31945 1.79492  17
   0 -11   1 0.28497 1.57435   9
   0  11   1-1.05493 1.89391  13
   0  11  -1 0.59629 1.64714  16
   0 -11  -1 1.14139 1.89712   9
   0 -11   1 0.70144 1.29175  14
   0 -11   1 1.49969 1.87166   4
   0 -11  -1-0.54388 1.78632   4
   0  11   1 1.25620 1.85078  16
   0  11   1 0.60881 1.82090  17
   0 -11  -1 2.41217 1.71446  14
   0  11   2-1.89170 2.19367  17
   0  11  -2-0.86076 1.61219  16
   0 -11   2-0.98834 1.82003   4
   0 -11  -2 2.07080 1.59330  14
   0  11   3-1.83950 2.29573  11
   0 -11  -3-0.28042 1.72603  23
   0  11  -3 0.88652 1.68789  16
   0 -11   4-0.81522 2.17277   4
   0  11   4 0.76260 2.34695  11
   0 -11  -4-0.33491 2.11791  23
   0 -11  -5 0.39004 2.46668  23
   0  11   5 1.97914 2.18691  11
   0  12   0 1458.08 45.9869  17
   0 -12   0 1476.39 45.4336   4
   0  12   0 1438.76 45.7493  16
   0 -12   0 1424.46 45.2807   9
   0 -12   1 1564.24 50.5385   9
   0  12   1 1660.58 50.3753  13
   0  12   1 1606.59 51.1530  17
   0  12  -1 1680.76 51.1812  16
   0 -12  -1 1720.53 50.6376   4
   0 -12  -1 1582.10 50.4769   9
   0 -12   1 1704.69 51.1326   4
   0  12  -2 515.265 19.4006  16
   0  12   2 480.005 19.5668  17
   0 -12  -2 503.098 19.4342   9
   0 -12   2 517.048 20.3091   4
   0  12  -3 1570.80 48.6865  16
   0  12   3 1544.02 49.9520  11
   0 -12   4 775.906 28.7738   4
   0  12   4 774.850 28.4746  11
   0  12   5 789.731 29.6113  11
   0 -12  -5 839.156 29.6010  23
   0  13   0-0.78159 2.19579  16
   0  13   0-0.35898 2.60396  13
   0  13   0 0.39567 1.86006  17
   0 -13   0 0.69509 2.07891   9
   0 -13   0-0.34647 2.19098   4
   0 -13  -1-0.33575 2.17841   4
   0 -13  -1-1.41018 2.50569   9
   0  13  -1 1.48981 2.38613  16
   0 -13   1 3.35264 2.50593   4
   0  13   1 1.57645 2.25110  17
   0 -13  -2-0.72297 2.31618   9
   0 -13  -2 4.24514 2.50716   4
   0  13  -2 1.10357 2.47487  16
   0 -13   2-1.24688 2.69691   4
   0  13   2 5.15825 2.54231  17
   0  13   3-0.44896 2.39317  11
   0 -13   3-0.45124 2.77744   4
   0  13  -3-0.37419 2.03124  16
   0  13   4 1.38278 2.63294  11
   0  14   0 147.205 9.56997  16
   0  14   0 146.899 9.26596  13
   0 -14   0 149.268 9.26539   4
   0 -14   0 135.908 9.05137   9
   0  14   0 147.645 9.59296  17
   0 -14  -1 482.882 18.7745   4
   0 -14  -1 440.357 18.6366   9
   0 -14   1 469.259 19.1778   4
   0  14   1 420.946 18.9650  17
   0  14  -1 430.454 18.8974  16
   0  14   2 79.0417 7.09604  17
   0  14  -2 82.8010 6.88623  16
   0 -14  -2 72.7769 6.60050   9
   0 -14   2 81.9014 7.18673   4
   0  14  -2 91.7088 7.77415  17
   0 -15   0 2.09861 3.04514   4
   0 -15  -1 0.39317 2.35183   4
  -1   0   0 1.84204 0.82895  15
   1   0   0 0.90435 0.71802   1
  -1   0   0 1.91724 0.69931  11
   1   0   0 0.38427 0.41556  22
   1   0   0-0.42480 0.46897  14
   1   0   1 1028.26 29.4354   7
  -1   0   1 1032.85 29.7478  11
   1   0   1 1131.02 30.0993   1
  -1   0  -1 993.217 29.8733  25
   1   0   1 1076.70 29.3603   5
  -1   0  -1 988.401 28.8466  13
  -1   0  -1 1078.09 29.9459  15
  -1   0   1 1026.31 28.4949   4
   1   0  -1 1050.23 29.2235  12
  -1   0   1 1039.45 29.9293  20
  -1   0   1 1050.95 29.3946  19
   1   0   2 1.13138 1.02589   1
  -1   0  -2 0.41935 1.46238  25
   1   0  -2 0.16536 0.66247  12
   1   0   2-0.24904 0.50297  19
  -1   0  -2 0.25882 1.16493  15
  -1   0   2-0.09881 0.83592  19
   1   0  -2 1.92260 0.85756  21
  -1   0   2 0.27812 0.79572   6
   1   0   3 86.5701 3.96289  19
  -1   0   3 81.0890 4.37495  11
  -1   0  -3 80.3846 4.12585  23
  -1   0   3 83.1527 4.31397   6
  -1   0   3 86.9916 4.88923  20
  -1   0  -3 74.5739 5.32493  25
  -1   0   3 87.4517 4.37395  19
  -1   0  -3 89.4854 4.36460  10
   1   0  -3 90.3383 4.23825  21
  -1   0  -3 80.1282 3.50911   8
  -1   0  -4 1.53392 2.40369  25
  -1   0  -4 1.23788 1.09976  23
  -1   0   4-0.75467 0.98691  19
   1   0  -4 1.37129 1.08293  23
   1   0  -4 0.64829 0.98365  21
  -1   0   4-0.43030 1.28698  20
  -1   0   4-0.17546 1.04958   6
   1   0   4 0.24506 1.48732   1
   1   0   4 0.57237 0.93996  19
  -1   0   5 902.071 28.1079  19
  -1   0  -5 778.327 26.8862  23
  -1   0   5 847.829 27.9718  18
   1   0  -5 892.122 27.2433  23
   1   0  -5 849.003 27.4284  21
   1   0   5 862.649 27.1274  19
   1   0   6-2.26861 3.12234   1
   1   0  -6-0.77393 1.60978  21
   1   0   6 0.99462 1.39715  19
  -1   0   6-0.27769 1.33616  18
  -1   0  -6-0.27437 1.48938  21
  -1   0   6 0.30470 1.53134  19
   1   0   7 40.9321 4.17151  19
   1   0   7 30.3376 6.78571   1
   1   0  -7 30.6322 3.46454  12
  -1   0  -7 42.5048 4.43901  21
  -1   0   7 41.1251 4.73125  19
  -1   0   7 38.8495 4.11688  18
   1   0   8 0.38990 2.22701  19
  -1   0   8-1.83306 2.44281  19
  -1   0  -8-0.38012 2.37202  21
   1  -1   0 33.1677 1.86942  14
   1   1   0 37.0412 1.76044  22
   1  -1   0 35.6631 1.96463   5
   1  -1   0 35.1974 1.83246   7
  -1  -1   0 36.4570 2.03340  20
  -1   1   0 34.3486 1.82994  11
   1   1   0 39.7702 1.54779   8
  -1  -1   0 35.6283 2.13658  10
   1  -1   1 592.783 17.3667   7
  -1  -1   1 610.933 17.9723  20
  -1   1   1 574.991 16.9237  19
   1  -1   1 581.205 17.3176   5
   1   1   1 573.700 17.2233   7
  -1  -1   1 595.498 17.0469  10
  -1   1   1 621.299 17.6783  11
  -1   1  -1 590.078 16.7043  17
   1   1  -1 579.252 16.9562  12
  -1  -1  -1 606.457 17.8288  10
   1   1  -1 558.139 16.9880   8
   1  -1   1 575.369 16.3939  19
  -1   1  -1 620.505 17.5676  25
   1  -1  -1 567.385 17.0221  12
  -1   1  -1 561.205 16.5042  11
   1  -1  -2 6288.15 168.537  23
  -1   1  -2 6271.18 169.215  25
  -1  -1   2 6531.79 169.093  19
   1  -1   2 7524.29 170.499   1
  -1  -1   2 6545.05 168.801   6
   1   1   2 6389.19 169.839   1
   1   1  -2 6252.06 168.242  12
   1   1   2 6344.38 168.638   7
   1   1  -2 6405.27 168.498  21
   1  -1   2 6171.30 167.866  19
  -1  -1  -2 6663.60 169.213  10
  -1  -1   2 6185.43 167.941   4
  -1   1   2 6476.83 168.493  19
   1   1   2 6106.44 167.033  11
  -1  -1   2 6551.99 167.404  10
  -1   1  -2 6609.64 166.974  16
  -1  -1  -2 5648.64 167.242   8
   1   1  -2 6196.44 168.580   8
  -1   1  -2 6061.97 169.174  15
  -1  -1   2 6190.32 169.580  20
   1   1   3 498.420 15.1091  11
   1  -1  -3 549.173 16.8699  23
  -1   1   3 536.772 16.8201  19
   1   1  -3 540.691 16.9147   8
  -1   1   3 507.847 15.7901   1
  -1  -1  -3 539.848 15.6650   8
  -1  -1  -3 491.117 16.9569  23
  -1   1   3 564.403 17.4328  11
  -1   1  -3 544.963 16.3162   8
  -1   1  -3 540.617 17.4346  15
  -1  -1   3 558.276 17.3471  18
  -1  -1   3 547.259 17.9696  20
   1   1  -3 525.916 16.4235  12
   1  -1   3 504.706 16.1539  19
  -1  -1  -3 548.704 17.1960  10
   1   1  -3 537.074 16.7660  21
  -1   1   3 524.468 17.5561  20
  -1  -1   3 561.970 17.4036  19
  -1   1  -3 563.278 17.8632  25
  -1   1   3 544.821 16.8130   6
  -1  -1   3 576.618 17.2650   6
  -1   1  -3 507.979 16.3061  23
  -1   1  -4 0.67508 1.04720  23
  -1  -1   4 2.62252 1.29359  19
   1   1  -4 1.47673 1.01149  21
  -1  -1  -4 3.33175 1.28587  23
  -1   1   4 0.84981 1.13598   1
   1   1   4 1.05188 0.88730  19
  -1  -1   4 2.96024 1.23273  18
  -1   1   4 2.17058 1.13008  19
  -1   1  -4 1.20517 2.39796  25
  -1   1   4 2.66575 1.20541  18
  -1   1   4 0.81819 1.13990   6
   1   1  -4 6.29419 1.49091   8
   1   1   4 0.24557 1.61406   1
  -1   1   4 1.49786 1.37199  20
  -1  -1   4 3.37158 1.40000   6
  -1   1  -4 3.91272 1.71716  15
  -1   1  -4 2.72208 0.97656   8
   1   1  -4 2.09014 1.00217  12
   1  -1   4 2.21744 2.15630   1
   1  -1  -4 1.64317 0.99881  23
   1  -1   4 2.13156 0.94640  19
  -1   1   4 2.82443 1.33944  11
  -1   1   5 98.0220 6.02260  20
   1   1  -5 83.5583 5.14764  21
  -1   1   5 89.2537 5.54745  19
   1  -1   5 79.2508 4.90612  19
   1   1   5 96.5429 5.27707  19
   1  -1  -5 99.4354 5.58683  21
  -1   1   5 100.352 6.05807   1
   1  -1  -5 85.6347 5.20891  23
  -1   1  -5 82.6521 6.94195  25
   1  -1   5 100.300 9.05987   1
   1   1  -5 88.5464 4.93731  12
  -1   1   5 85.8499 5.45707  18
  -1  -1   5 84.2192 5.54740  19
  -1  -1  -5 78.4471 5.05276  23
   1   1   5 93.1311 6.28236   1
  -1  -1   6 1960.19 57.3078  18
   1   1   6 1851.59 56.3097  19
  -1  -1   6 1915.11 57.8088  19
   1   1  -6 1886.20 56.5471  21
   1   1  -6 1812.24 55.7255  12
   1   1   6 2071.20 59.3900   1
   1  -1  -6 1880.65 56.4261  23
  -1  -1  -6 1880.70 56.3073  23
  -1   1   6 1929.21 56.9432  18
   1  -1   6 1862.55 56.5780  19
  -1   1   6 1989.39 57.6883  19
   1  -1  -6 1932.45 56.7661  21
  -1  -1  -6 1885.58 57.0956  21
  -1   1  -6 1920.04 56.9529  21
   1   1   7 80.7197 6.09976  19
  -1   1   7 92.7757 6.82009  19
  -1   1   7 86.9465 6.22216  18
  -1  -1  -7 88.1491 6.60833  21
  -1   1  -7 85.2342 6.27057  21
  -1  -1   7 78.3798 6.59529  19
   1  -1   7 83.3416 6.20029  19
   1   1   7 107.173 9.12278   1
   1  -1  -7 100.390 6.56898  21
  -1  -1   7 91.2650 6.56858  18
   1   1  -7 95.5996 6.40448  21
   1   1   8 0.79297 1.99295  19
   1  -1   8 1.94097 2.10757  19
   1  -1  -8 7.31390 2.90613  21
  -1   1  -8-0.37528 2.72251  21
  -1  -1  -8 5.00478 2.70780  21
   1   1  -8-0.72542 2.44021  21
  -1   1   8-0.45342 2.41725  19
  -1   1   8 1.82533 1.90998  18
   1  -2   0 811.685 23.5672   7
  -1   2   0 840.784 23.8337  11
  -1   2   0 814.336 23.9276  17
  -1  -2   0 835.196 24.3745  10
   1  -2   0 855.177 23.2530  12
  -1   2   0 821.263 24.0440  13
   1  -2   0 831.121 23.7766   5
   1  -2   0 819.795 24.0450  14
   1   2   1 251.350 7.56285   5
   1  -2   1 237.613 7.20157  19
  -1   2   1 249.430 7.56724  19
   1   2  -1 245.530 7.65050  22
  -1   2  -1 259.188 7.90531  17
  -1  -2   1 235.231 7.98412  10
   1   2   1 257.193 7.50130  16
  -1   2   1 244.336 8.32933  11
   1  -2   1 268.811 8.44425  14
   1  -2  -1 228.404 7.16838   7
  -1  -2  -1 252.508 8.78255  10
   1  -2  -2 3335.79 92.4520  23
   1  -2  -2 3406.16 92.0442  21
  -1  -2   2 3299.15 92.0532   4
  -1  -2   2 3270.16 93.1071  19
  -1   2   2 3317.11 92.1095  19
  -1  -2   2 3435.26 92.8058  18
  -1   2  -2 3407.33 91.2370  16
  -1  -2   2 3358.21 91.4649  10
  -1  -2  -2 3445.56 93.3367  10
   1   2  -2 3323.61 91.9293  12
   1   2   2 3392.52 92.3278   7
  -1  -2   2 3570.84 92.8064   6
   1  -2   2 3213.84 91.7261  19
   1   2  -2 3389.51 92.5441   8
   1   2   2 3181.31 91.2950  16
   1   2  -3 623.864 19.1388  12
   1  -2  -3 644.833 19.6284  21
  -1   2  -3 676.357 20.4580  15
  -1  -2   3 658.526 20.2624   6
  -1   2  -3 553.222 20.6100  25
  -1  -2   3 639.524 20.4127  19
   1   2   3 651.186 17.9256  20
  -1   2   3 632.572 19.6271  19
   1   2   3 665.542 19.6035   7
  -1   2   3 645.685 19.4124   6
  -1   2   3 623.060 19.2223   1
   1   2   3 609.899 18.3126  11
  -1   2   3 775.091 21.6562  11
   1   2  -3 658.496 19.8768   8
   1  -2   3 611.502 19.1705  19
  -1  -2  -3 610.914 20.0396  10
  -1   2  -3 581.055 18.7452  23
   1  -2  -3 628.509 19.8053  23
  -1  -2   3 647.656 20.2189  18
   1   2  -3 657.881 19.6702  21
  -1   2   4 78.0353 4.85656  11
   1   2   4 78.3075 3.43667  11
   1  -2   4 76.4553 4.24388  19
  -1  -2   4 79.4144 4.67933  18
  -1  -2  -4 66.1717 4.45078  23
   1  -2  -4 72.6618 4.26732  21
  -1   2   4 55.8512 3.82280   1
   1   2  -4 74.7956 4.27856  21
  -1  -2   4 74.1637 4.65044   6
   1   2  -4 71.8790 4.35157   8
  -1   2   4 73.6466 4.33095  19
  -1   2  -4 84.6870 5.52325  25
   1   2  -4 64.8634 3.74376  12
  -1   2   4 75.2537 4.84939  20
  -1  -2   4 79.7970 4.87110  19
   1  -2  -4 73.0500 4.32245  23
  -1   2  -4 69.0845 4.06900   8
  -1   2   4 70.7978 4.12625   6
   1   2   4 53.6968 5.19838   1
  -1   2  -4 77.1191 4.90765  15
  -1   2  -5 3.07523 2.80487  25
  -1   2  -5 3.65951 1.57862  21
   1  -2  -5 3.55434 1.63498  21
  -1   2   5 3.00613 1.59288  11
  -1   2   5 4.87389 1.54461  18
  -1   2   5 1.49230 1.36261   1
   1  -2   5 3.03534 1.37879  19
   1  -2   5-0.17871 1.08692   2
   1   2  -5 1.45717 1.30088  21
   1  -2  -5 3.52933 1.43290  23
  -1  -2   5 1.22053 1.22881  18
  -1   2   5 3.65963 1.44814  19
   1   2  -5 3.39330 1.50563   8
   1   2  -5 2.10745 1.18973  12
  -1  -2   5 2.16129 1.44182  19
  -1  -2  -5 5.56856 1.78259  23
  -1   2   5 3.60335 1.83066  20
   1   2   5 4.63485 2.10378   1
   1  -2  -6 56.1990 4.56980  21
  -1   2   6 51.0670 4.54991  20
  -1  -2   6 49.6228 4.49550  18
  -1   2   6 58.8629 4.58614  18
  -1  -2  -6 54.6009 4.52137  23
  -1   2   6 53.2772 4.61545  19
   1   2  -6 55.3143 4.48588  21
   1   2   6 45.8650 5.00311   1
   1  -2   6 51.1276 4.25576  19
  -1   2  -6 44.3921 4.18497  21
   1  -2  -6 56.4438 4.53293  23
   1   2   6 47.6613 4.06707  19
  -1   2  -7 176.056 9.51141  21
  -1   2   7 188.689 10.2198  19
  -1   2   7 169.590 9.29576  18
   1   2  -7 191.594 9.64374  21
  -1  -2  -7 176.393 9.53010  23
  -1  -2   7 186.694 10.0448  18
   1   2   7 193.250 11.3542   1
   1  -2  -7 184.843 9.60394  23
   1  -2  -7 185.110 9.70668  21
   1  -2   7 182.706 9.81160  19
   1   2   7 176.636 9.45021  19
   1  -2   8 8.43429 2.77068  19
  -1   2  -8 6.19257 2.56919  21
  -1   2   8 5.78156 2.70607  19
  -1   2   8 7.39635 2.32164  18
  -1  -2  -8 12.2948 3.20947  21
  -1  -2   8 7.96228 3.22897  19
   1   2  -8 4.67621 2.61648  21
   1  -2  -8 8.05884 2.69061  21
   1   2   8 5.92740 2.47342  19
   1  -3   0 6473.77 177.329   5
  -1  -3   0 6462.27 176.618  18
   1  -3   0 6297.36 177.032   4
  -1   3   0 6600.37 177.882  13
   1  -3   0 6547.19 176.718  12
   1  -3   0 6694.94 177.946  14
  -1   3   0 6540.69 177.763  17
  -1  -3   0 6523.92 178.361  10
   1   3  -1 4522.39 127.100  22
  -1  -3   1 4672.01 127.932  10
  -1   3   1 4739.90 126.992  19
   1  -3  -1 4653.42 127.409  23
   1   3   1 4572.66 126.754   5
   1  -3   1 4881.20 128.225  14
  -1  -3   1 4704.54 127.649   6
  -1   3  -1 4685.18 127.357  16
  -1  -3   1 4607.72 127.546  18
  -1  -3   1 4588.94 127.173   9
  -1  -3  -1 4752.81 128.815  10
  -1   3   1 4635.46 128.125  11
   1   3   1 4663.58 127.185  16
   1   3  -2 531.857 16.3425   8
  -1   3  -2 461.396 14.6142  23
  -1  -3  -2 539.442 17.0573  10
   1  -3  -2 528.480 15.4215  21
   1   3   2 505.188 14.7694  17
  -1   3   2 550.499 15.7538  19
  -1  -3   2 524.946 15.3631  10
   1   3   2 500.704 15.6649   7
  -1   3  -2 546.191 15.2145  16
   1  -3   2 505.046 15.4001  19
  -1  -3   2 518.621 16.2789  18
  -1  -3   2 533.826 15.9177   4
   1   3   2 527.946 15.2409  16
   1   3   3 3154.88 87.2132  11
   1  -3  -3 3143.95 88.6444  23
   1   3   3 3274.44 87.9908   7
  -1  -3   3 3284.32 89.0222   6
   1   3  -3 3003.10 88.1825  21
   1   3  -3 2951.10 87.4974  12
  -1   3   3 3079.67 87.7401   6
  -1   3   3 3260.66 89.1564  11
  -1  -3   3 3114.27 88.2980   4
  -1  -3   3 3236.65 88.8207  18
  -1   3   3 3252.83 88.3477  19
   1  -3   3 3010.99 87.9253  19
   1  -3  -3 3302.49 88.1177  21
  -1  -3  -3 3261.07 89.4293  10
   1   3  -3 3292.59 88.8982   8
   1   3   3 3234.43 88.2172  19
   1  -3   4 2652.40 73.6951  19
  -1   3   4 3279.09 76.7457  11
   1  -3  -4 2902.70 73.9612  21
   1   3  -4 2547.98 73.6311  21
  -1  -3   4 2647.01 74.5586  18
   1  -3  -4 2735.66 74.3466  23
  -1   3  -4 2750.42 75.3256  25
   1   3   4 2697.15 73.7783  19
   1   3   4 2759.65 72.4828  11
   1   3  -4 2625.24 74.2948   8
  -1  -3   4 2406.59 74.7771  19
   1   3   4 2434.04 76.5029   1
  -1  -3  -4 2656.32 74.7591  23
   1   3  -4 2436.52 72.8317  12
  -1   3   4 1876.56 73.6572   1
  -1   3  -4 2507.13 73.6489  21
  -1   3   4 2597.23 73.8285  19
   1  -3  -5 1986.85 54.9089  21
   1   3  -5 1878.85 55.2383   8
  -1  -3  -5 1796.05 55.3524  23
  -1   3  -5 1879.75 56.6369  25
  -1   3   5 1870.53 55.0718  18
   1  -3   5 1856.04 54.6843  19
  -1   3   5 1885.98 55.0190  19
  -1  -3   5 1913.86 55.5536  18
  -1   3   5 1833.88 54.0446   1
  -1   3  -5 1770.15 54.4807  21
   1   3   5 1818.15 56.7208   1
   1  -3  -5 1868.68 55.1081  23
  -1   3   5 1908.18 55.7302  20
  -1   3  -5 1849.71 54.6072   8
   1   3  -5 1833.58 54.5603  21
  -1   3   5 1909.62 55.4644  11
  -1   3   6 66.4223 5.09260  11
  -1   3  -6 69.6840 5.08183  21
   1  -3  -6 73.6777 5.28786  21
   1   3   6 66.8138 5.94419   1
  -1   3   6 62.5729 5.04974  19
   1  -3   6 68.2651 5.09858  19
  -1  -3  -6 65.1269 5.13010  23
   1  -3  -6 61.4548 5.10424  23
  -1   3   6 72.4241 5.54992  20
  -1   3   6 65.3240 4.89609  18
   1   3  -6 73.3409 5.15526  21
  -1  -3   6 71.6636 5.44002  18
   1   3  -6 69.8948 5.30005   8
  -1  -3  -7 903.693 30.3900  21
   1  -3   7 830.821 29.6565  19
  -1   3   7 930.295 31.0154  19
   1  -3  -7 926.116 29.8853  21
  -1   3   7 887.660 29.4082  18
   1   3   7 821.536 29.3612  19
  -1   3  -7 869.729 29.3810  21
   1   3   7 891.912 31.7458   1
  -1  -3   7 849.743 30.9049  19
   1  -3  -7 906.413 30.1563  23
   1   3  -7 868.846 29.3951  21
  -1  -3  -7 859.739 29.7784  23
  -1  -3  -8 518.760 20.6299  21
  -1  -3   8 517.988 21.8296  19
   1  -3   8 492.915 20.4197  19
  -1   3   8 531.938 19.8300  18
  -1   3   8 503.036 20.9946  19
   1  -3  -8 549.494 20.5137  21
   1   3   8 476.241 20.0318  19
  -1  -3  -8 498.516 20.1109  23
   1   3  -8 501.188 19.7775  21
  -1   3  -8 473.253 19.4550  21
  -1   4   0 4891.14 132.619  17
  -1  -4   0 4654.67 133.150  10
  -1  -4   0 4856.64 131.018  14
   1  -4   0 4743.95 132.732  14
   1  -4   0 4735.85 131.834   4
  -1   4   0 4914.12 132.739  13
  -1   4  -1 1.72942 0.84255  16
  -1   4   1 2.19549 0.62667  19
   1   4  -1 1.31004 0.58964  22
  -1  -4   1 4.80822 0.85789  18
  -1   4   1 2.16966 1.08923  17
  -1  -4  -1 2.04331 1.18626  10
  -1  -4   1 8.84159 1.20114   6
   1   4   1 1.00282 0.70952  16
  -1   4   1 1.54000 1.00444  11
  -1   4   1 1.37790 1.00545  13
  -1  -4   1 1.84560 0.84975   9
   1  -4   1 1.84228 0.92744  14
  -1  -4   1 1.87040 0.93321  10
   1  -4  -1 2.02899 0.76998  23
   1  -4   1 1.25449 0.87991   4
   1  -4  -1 4.21788 0.86792   5
  -1   4   2 27.0841 1.99367  19
   1   4   2 32.3584 1.86322  17
  -1  -4   2 31.4146 2.37883   4
  -1  -4   2 31.8418 2.48349   6
   1   4  -2 27.5649 1.73523  22
   1  -4  -2 27.9729 2.22051  23
  -1  -4   2 32.0206 2.34053  18
  -1   4  -2 33.2976 2.04317  16
   1   4   2 28.2919 1.31199  13
  -1  -4  -2 24.5073 2.62462  10
   1  -4  -2 31.0617 1.85220  21
   1   4   2 28.3596 2.03182  16
   1   4   2 30.4067 2.22203   7
   1  -4   3 145.004 6.31298  19
  -1  -4   3 163.076 6.84960   4
   1   4   3 153.594 6.05337  11
  -1   4   3 167.737 6.71243  19
   1  -4  -3 169.384 6.41818  21
  -1  -4  -3 173.430 7.72169  10
  -1   4   3 148.230 7.05535  11
   1   4   3 162.647 6.33360   7
   1   4  -3 164.477 7.13369   8
  -1  -4   3 156.888 6.91661  18
   1   4   3 164.260 6.69712  19
  -1   4  -3 143.130 6.20359  21
   1   4   4 662.870 20.0637   7
   1   4   4 634.808 19.5313  11
   1   4  -4 591.550 20.3978  21
  -1   4  -4 563.283 20.0611  21
   1  -4  -4 669.942 20.4683  21
  -1  -4   4 659.276 21.3126  18
   1  -4  -4 641.813 21.1340  23
   1   4  -4 655.556 21.2174   8
  -1   4   4 672.930 20.8877  19
   1   4   4 699.744 23.8930   1
  -1   4  -4 648.992 22.0275  25
   1  -4   4 610.160 20.4415  19
  -1   4   4 652.573 21.5782  11
  -1  -4  -4 660.383 21.7273  23
   1   4   4 612.910 20.4187  19
  -1  -4   5 86.6872 6.31530  19
  -1   4   5 94.4748 5.74405   1
  -1   4   5 105.712 6.70945  11
  -1   4  -5 90.4107 5.45574  21
   1   4   5 94.5364 7.09712   1
  -1   4   5 101.520 5.79919  18
   1  -4   5 97.9311 5.70187  19
  -1   4   5 107.787 6.05359  19
  -1  -4   5 109.014 6.33484  18
  -1   4  -5 96.1197 5.86486   8
   1   4  -5 97.5476 5.96445   8
  -1  -4  -5 98.5801 6.34557  23
  -1   4  -5 102.878 6.78509  25
  -1   4   5 102.313 6.33598  20
   1   4  -5 96.6449 5.65687  21
   1  -4  -5 107.768 5.85225  21
   1  -4  -5 96.0537 6.07247  23
   1   4   5 94.7851 5.74014  19
   1   4  -6 7.17141 1.98542  21
  -1   4  -6 11.3003 2.32056  21
   1  -4  -6 15.1599 2.76079  23
   1  -4   6 8.74691 2.22158  19
   1   4   6 13.1204 3.19745   1
   1   4   6 12.5859 2.51644  19
  -1   4   6 13.7697 2.35491  18
  -1   4   6 10.0524 2.40407  11
  -1   4   6 8.52024 2.37007  19
  -1  -4   6 5.88631 2.21783  19
  -1  -4  -6 9.35800 2.43161  23
   1   4  -6 10.5364 2.38807   8
   1  -4  -6 11.2084 2.46620  21
   1   4  -7 46.0652 4.52204  21
  -1   4   7 45.8105 4.93143  19
  -1   4   7 46.6708 4.28994  18
  -1  -4  -7 55.2429 5.33260  23
   1  -4  -7 47.4586 4.89767  23
  -1  -4   7 39.8413 5.08151  19
   1   4   7 36.1512 5.41888   1
   1  -4   7 45.9473 4.76491  19
   1   4  -7 45.7753 4.82308   8
   1  -4  -7 49.0726 4.76717  21
  -1  -4  -7 47.2917 4.94822  21
  -1   4  -7 44.9669 4.42833  21
  -1   4  -8 15.9338 3.31358  21
   1  -4  -8 19.7071 3.60580  21
  -1  -4  -8 19.5663 3.72648  23
  -1   4   8 18.5276 3.82695  19
  -1  -4  -8 21.8494 4.01221  21
   1   4  -8 19.2245 3.53809  21
   1  -4  -8 14.9881 3.30964  23
   1  -4   8 19.0381 3.75861  19
  -1  -5   0 1437.04 41.6841   6
   1   5   0 1553.79 42.7047  16
  -1  -5   0 1487.32 41.5327  14
  -1   5   0 1514.92 43.2470  17
   1  -5   0 1526.26 42.4130   4
  -1  -5   1 552.518 17.5877  10
  -1   5   1 535.983 17.5406  13
   1  -5   1 555.229 17.2452   4
  -1  -5  -1 591.159 18.5616  10
   1  -5  -1 503.498 16.0867   5
   1  -5  -1 544.423 16.5693  23
  -1   5  -1 571.427 17.1333  16
  -1   5   1 582.690 17.8657  11
  -1  -5   1 534.518 16.8513   9
  -1   5   1 553.195 16.2614  19
   1   5   1 525.713 16.8104  16
  -1  -5   1 564.326 16.8202   6
  -1   5   1 550.451 17.6722  17
   1  -5  -2 847.860 23.5171  21
  -1  -5   2 847.048 25.0412   6
  -1  -5   2 881.081 25.2079   4
  -1  -5  -2 844.966 26.3634  10
  -1  -5   2 809.560 24.7005  18
   1  -5  -2 818.445 24.8116  23
   1   5   2 819.482 24.0519  17
   1   5   2 789.139 24.3556  16
  -1   5  -2 842.266 24.4376  16
   1   5   2 765.108 23.1516  13
  -1   5   2 839.616 24.2563  19
  -1  -5  -3 228.734 10.0519  10
  -1  -5   3 233.046 9.18582  18
   1   5   3 235.891 8.92944  19
  -1   5   3 233.362 8.84743  19
   1   5   3 236.996 8.39175   7
  -1   5   3 227.889 9.64573  11
   1  -5  -3 222.728 9.17985  23
   1   5  -3 238.709 9.57616   8
  -1  -5   3 239.545 9.41443   4
  -1  -5  -3 190.996 9.31147  23
   1  -5  -3 230.838 8.22499  21
   1   5   4 949.787 27.7944   7
  -1  -5  -4 965.362 29.9832  10
  -1   5  -4 803.708 27.9113  21
  -1   5   4 940.420 29.7642  11
  -1  -5   4 922.628 29.2025   4
  -1   5   4 966.333 29.0741  19
  -1  -5  -4 954.234 30.1493  23
   1  -5  -4 972.936 28.3177  21
   1   5   4 931.970 28.8523  19
   1   5  -4 952.776 29.7028   8
   1   5   4 909.940 27.8828  11
  -1   5   5 203.481 9.05998  19
   1  -5  -5 211.449 8.71611  21
  -1   5  -5 198.045 9.16773   8
   1  -5   5 194.268 8.86806  19
  -1   5   5 184.216 8.46363  18
  -1   5  -5 174.946 8.16195  21
  -1   5   5 237.258 10.5173  11
   1   5  -5 197.352 9.28861   8
   1   5  -5 193.823 8.55714  21
  -1   5  -5 183.863 9.78498  25
   1   5   5 208.810 11.4435   1
  -1  -5  -5 190.550 9.64167  23
   1  -5  -5 218.159 9.70679  23
   1   5   5 190.093 8.76200  19
  -1   5   6 179.189 9.30728  19
  -1   5  -6 156.046 8.35603  21
   1  -5  -6 205.320 9.25211  21
   1   5   6 183.367 9.32193  19
   1   5  -6 172.101 8.64636  21
   1   5  -6 175.771 9.43156   8
   1  -5   6 171.974 9.14897  19
  -1   5   6 173.116 8.60156  18
  -1   5   6 183.601 9.83756  11
   1   5   6 188.165 10.9883   1
   1  -5  -6 192.420 9.78565  23
  -1  -5  -6 178.220 9.75618  23
   1   5  -7 46.6332 4.47611  21
   1  -5  -7 44.7485 4.60256  21
  -1   5   7 35.2526 4.41859  19
  -1   5  -7 36.0855 4.06264  21
   1   5   7 53.1581 6.03584   1
  -1  -5  -7 36.2282 4.54404  23
  -1  -5  -7 43.2019 4.80958  21
   1   5   7 43.4397 4.80537  19
   1   5  -7 39.7174 4.59413   8
   1  -5  -7 39.8250 4.61726  23
   1  -5   7 46.7689 4.87227  19
   1   5  -8 317.309 15.1450   8
   1  -5  -8 339.953 14.8157  21
  -1  -5  -8 308.726 14.8878  21
   1  -6   0 381.793 11.6250  23
  -1  -6   0 391.651 11.8700   6
  -1  -6   0 383.497 11.9865  14
   1  -6   0 381.397 13.5432  14
   1   6   0 391.898 13.0004  16
  -1   6   0 402.564 13.6533  17
   1  -6   0 383.526 12.7363   4
  -1   6   0 416.371 13.4657  16
  -1  -6  -1 7.61430 1.70711  10
  -1   6  -1 8.27254 1.46551  16
   1   6  -1 10.0171 1.49689  16
  -1  -6  -1 10.2414 0.76053   6
  -1   6   1 10.1885 1.86897  13
  -1  -6   1 8.14220 1.36928   6
   1   6   1 9.66645 1.40168  16
  -1  -6   1 9.90964 1.57189   9
   1  -6  -1 9.71479 1.49022   4
   1  -6   1 10.3167 1.65159  14
   1  -6   1 10.5994 1.67773   4
   1  -6  -1 6.87966 1.17856  23
   1  -6  -2 90.9574 4.69542  23
  -1  -6   2 83.4945 4.85589   4
  -1   6   2 96.4106 4.36809  19
  -1  -6  -2 99.0627 5.84731  10
   1  -6  -2 93.0525 3.50087  21
   1   6   2 87.1749 4.51976  16
   1   6   2 85.5359 4.30826  17
  -1   6  -2 91.7416 4.58687  16
   1   6   2 84.2354 3.66632  13
  -1   6   3 339.104 13.1644  11
   1   6   3 348.603 11.6114   7
  -1  -6  -3 337.580 13.3321  23
  -1  -6  -3 340.992 13.6363  10
   1  -6  -3 334.759 12.6590  23
  -1  -6   3 319.080 13.0002   4
   1   6   3 336.239 11.5582  17
   1  -6  -3 362.007 11.4018  21
  -1   6   3 350.451 12.1982  19
   1  -6  -4 148.942 7.46256  23
  -1   6   4 142.107 7.63749  11
  -1   6   4 144.669 6.95919  19
  -1  -6  -4 137.445 7.61009  10
  -1  -6   4 137.052 7.28344   4
   1   6   4 133.070 6.74763  19
   1   6  -4 137.794 7.47615   8
   1  -6  -4 136.369 6.19572  21
   1   6   4 129.527 6.30926  11
   1  -6  -5 112.107 5.79860  21
  -1   6   5 97.6501 6.39328  11
  -1   6   5 90.3716 5.78858  19
   1   6   5 100.086 5.98328  19
  -1   6  -5 61.3186 5.79605  25
   1   6  -5 91.7273 6.19431   8
  -1  -6  -5 89.4352 6.48612  23
   1   6   5 63.1209 8.02600   1
  -1   6   6 46.3161 5.28056  11
   1  -6  -6 40.2020 3.89838  21
   1  -6  -6 33.9208 4.25658  23
  -1  -6  -6 40.3356 4.60025  23
   1   6  -6 42.1618 4.35094   8
  -1   6  -6 34.3962 4.03707   8
   1   6   6 31.1203 3.91635  19
   1   6   6 42.5162 5.53249   1
  -1   6   6 39.4410 4.15283  19
   1  -6  -7 266.903 11.9541  21
  -1  -6  -7 277.908 12.7849  21
  -1   6   7 234.579 12.2725  19
   1   6   7 257.892 14.1854   1
   1   6   7 259.048 12.5765  19
   1   6  -7 239.327 12.3122   8
   1  -6  -7 249.603 12.8990  23
  -1  -6  -7 251.287 12.9822  23
   1  -7   0 5504.06 151.518   4
  -1   7   0 5583.71 152.322  16
  -1   7   0 5633.72 152.685  17
   1   7   0 5397.11 151.679  16
   1  -7   0 5551.66 149.871  23
  -1  -7   0 5296.63 150.416  14
  -1   7   0 5665.72 152.736  13
   1  -7   0 5388.93 152.304  14
  -1  -7   1 192.242 8.40754   4
   1   7   1 189.622 7.96559  16
   1   7  -1 201.594 8.09473  16
   1  -7  -1 195.728 7.35302  23
  -1  -7  -1 197.908 9.16919  10
   1  -7  -1 196.680 7.67189   4
  -1   7  -1 206.154 8.33939  16
   1  -7   1 195.686 8.34479   4
  -1  -7   1 203.093 8.13397   9
  -1   7   1 191.664 8.53381  13
   1  -7   1 210.057 8.38361   9
   1  -7   1 194.204 8.50541  14
  -1  -7   2 284.885 10.9798   4
   1   7  -2 284.020 10.5119  16
   1   7   2 263.752 9.19966  13
   1   7   2 270.866 10.0031  17
   1  -7  -2 263.589 10.1248  23
  -1   7   2 258.223 10.7375  13
   1   7   2 274.408 10.3334  16
   1  -7   2 273.927 11.0296   4
  -1  -7  -2 270.642 11.7311  10
  -1   7  -2 288.443 10.4982  16
   1   7   3 236.504 8.73172   7
  -1  -7  -3 248.682 11.1598  10
   1   7   3 237.237 9.07638  17
  -1   7   3 238.774 9.38461  19
  -1  -7  -3 241.721 10.7025  23
   1  -7  -3 245.766 10.0352  23
  -1  -7   3 235.867 10.2729   4
  -1   7   3 232.093 10.4961  11
   1   7   4 3050.36 90.4922  11
   1   7   4 3147.33 91.1127  19
  -1   7   4 3356.51 91.1342  19
   1  -7  -4 3210.18 91.8200  23
  -1   7   4 3067.40 92.1323  11
  -1  -7   4 3304.68 92.2814   4
   1   7  -4 3113.33 92.0690   8
  -1  -7  -4 3380.97 92.9484  10
  -1  -7  -4 3222.34 92.5391  23
  -1   7   5 71.8994 5.87890  11
   1   7   5 78.6877 5.46114  19
   1   7  -5 69.1891 5.60740   8
   1  -7  -5 85.9714 6.05958  23
  -1   7   5 81.2693 5.52254  19
  -1   7   6 82.4162 6.15119  19
  -1  -7  -6 82.8486 6.66143  23
  -1   7  -6 81.1795 6.22444   8
   1   7  -6 80.8853 6.41778   8
   1  -7  -6 85.9433 6.69379  23
   1   7   6 91.5884 6.38889  19
  -1   7   6 101.353 7.52332  11
  -1  -7  -7 114.904 7.79628  21
  -1   7   7 102.709 7.67676  19
   1   7   7 112.795 9.57158   1
   1   7   7 116.366 7.95684  19
   1   7  -7 126.370 8.40297   8
  -1  -7  -7 108.097 8.24033  23
   1  -8   0 189.175 7.70673   4
  -1   8   0 172.631 8.22097  17
   1   8   0 166.964 7.57631  16
  -1  -8   0 167.521 7.70846   9
  -1   8   0 166.660 8.25643  13
  -1   8   0 182.884 8.12957  16
  -1  -8   0 168.870 6.61437  14
   1  -8   0 156.727 7.85613  14
   1  -8   1 114.231 5.96716   4
  -1   8  -1 115.983 6.14039  16
  -1   8   1 102.270 6.09694  13
  -1   8  -1 114.786 6.44136  17
   1   8   1 104.400 5.67322  16
   1   8  -1 110.825 5.71617  16
  -1  -8   1 102.061 5.69155   9
   1  -8   1 105.249 5.82963   9
   1  -8   1 106.286 5.94135  14
  -1  -8  -1 105.407 4.94034  14
  -1  -8   1 119.688 6.22894   4
   1  -8  -1 107.100 6.07784  14
   1  -8  -1 117.674 5.61764   4
   1  -8  -1 113.991 5.05390  23
   1   8   2 693.027 23.3720  16
  -1  -8   2 757.365 24.2928   4
   1  -8  -2 746.899 23.1558  23
   1   8   2 740.015 23.2138  17
  -1   8  -2 747.289 23.7664  16
   1  -8   2 747.775 24.3282   4
   1   8  -2 732.762 23.5932  16
   1   8   2 716.493 22.1847  13
  -1   8   2 723.643 24.1152  13
  -1   8   3 10.4663 2.38621  11
   1   8   3 9.62103 1.85222  17
   1   8  -3 14.2776 2.12943  16
  -1  -8   3 10.0311 2.28547   4
   1  -8  -3 11.7531 2.16702  23
  -1  -8  -3 10.5091 2.39254  23
   1   8   4 8.66797 2.00282  19
   1   8   4 9.67105 2.19472  11
  -1   8   4 9.07934 2.58375  11
  -1  -8   4 14.4959 2.71695   4
  -1  -8  -4 11.9162 2.55227  23
   1   8  -4 10.6971 2.11887  16
   1   8  -4 9.41868 2.24242   8
   1  -8  -4 8.41736 2.21008  23
  -1   8   5 117.970 6.97756  19
   1   8   5 109.470 6.80280  19
   1   8  -5 116.986 7.50039   8
  -1   8   5 109.091 7.55325  11
   1  -8  -5 120.104 7.58950  23
  -1  -8  -5 107.500 7.57731  23
  -1   8   6 108.604 7.89857  11
  -1   8   6 107.778 7.17078  19
   1   8   6 95.1965 6.86579  19
  -1   8  -6 99.8117 7.13657   8
   1   8  -6 100.770 7.31780   8
   1  -8  -6 106.306 7.52992  23
   1   8   7 2.88267 4.01134   1
  -1   8   7-1.18675 2.33122  19
   1  -8  -7-0.43755 2.37518  23
   1  -9   0 93.2989 5.33801   4
  -1   9   0 95.3878 6.05930  13
  -1  -9   0 82.3491 5.23589   9
  -1   9   0 85.0651 5.72970  17
   1   9   0 88.0416 5.31428  16
   1  -9   0 86.0048 5.48169  14
  -1   9  -1 411.144 15.4062  17
   1  -9  -1 438.002 14.2129   4
  -1   9   1 336.935 14.7030  17
   1  -9   1 397.086 14.5617   4
  -1   9  -1 408.569 14.8052  16
   1   9  -1 375.567 14.1666  16
  -1  -9   1 380.123 14.1292   9
   1  -9   1 382.165 14.4357   9
   1  -9   1 359.429 14.3352  14
   1  -9  -1 368.226 14.4664  14
  -1  -9   1 386.684 14.6725   4
   1   9   1 362.035 14.0665  16
  -1   9   1 378.982 14.8616  13
  -1  -9   2 3962.40 107.118   4
  -1   9  -2 3927.08 106.633  16
  -1   9   2 3749.15 107.240  17
   1   9   2 3544.85 105.653  17
   1   9   2 3701.04 106.223  16
   1   9  -2 3691.84 105.964  16
   1  -9   2 3595.58 106.932   4
  -1  -9  -2 3869.30 106.622  23
  -1   9   2 3654.21 106.547  13
   1  -9  -2 3854.93 105.349  23
   1   9   3 349.369 13.2509  17
  -1   9   3 373.290 15.1872  11
   1   9  -3 356.005 13.6514  16
  -1  -9  -3 358.346 14.6005  23
  -1  -9   3 348.178 14.4855   4
   1  -9  -3 348.580 13.6031  23
  -1  -9  -4 65.4825 5.65296  23
  -1  -9   4 78.9262 6.20901   4
   1   9  -4 66.9805 4.92768  16
   1   9   4 72.7017 5.37032  11
  -1   9   4 72.1475 5.93515  11
   1  -9  -4 71.6758 5.45112  23
   1   9   4 74.0233 5.31761  19
   1   9   5 182.257 9.44504  19
  -1   9   5 186.583 10.5366  11
  -1  -9  -5 175.858 10.1977  23
   1   9  -5 179.930 10.0885   8
   1  -9  -5 189.389 10.0295  23
  -1   9   6 1395.44 36.5684  11
   1   9   6 1369.38 35.1837  19
   1  -9  -6 1413.15 36.2696  23
  -1  -9  -6 1357.54 36.4728  23
   1   9  -6 1328.40 35.5343   8
   1 -10   0 103.162 5.90643   4
  -1  10   0 88.5655 6.34401  17
  -1  10   0 94.1500 6.42088  13
   1  10   0 101.282 6.07335  16
  -1 -10   0 82.3828 5.57115   9
   1 -10   0 97.6530 6.12889  14
  -1  10   1 75.7183 5.77445  17
   1 -10   1 73.6929 5.37203   4
  -1  10   1 83.4596 5.85047  13
  -1 -10   1 77.2448 5.60673   4
   1 -10   1 69.3066 5.11708  14
   1  10   1 73.0044 5.14740  16
   1  10  -1 71.7101 5.04514  16
  -1 -10  -1 79.8697 5.06994  23
  -1 -10   1 71.1458 5.03669   9
  -1  10  -1 83.5996 5.95394  17
   1 -10  -1 63.8670 5.13969  14
   1 -10  -1 82.4582 5.17303   4
  -1  10  -1 70.9476 5.45130  16
   1 -10  -2 211.190 9.20123   4
  -1 -10   2 202.930 10.0674   4
   1  10   2 198.577 9.60241  16
   1  10   2 202.490 9.36617  17
  -1  10  -2 212.069 9.86453  16
   1 -10   2 209.516 10.2341   4
   1  10  -2 203.914 9.50182  16
  -1 -10  -2 214.883 9.90153  23
  -1  10   2 192.422 9.87272  13
  -1  10   2 198.795 10.3108  17
   1 -10   3-0.33472 1.88089   4
  -1  10   3 1.82589 2.11928  11
   1  10   3 2.18419 1.68870  17
   1  10  -3-0.25977 1.45980  16
  -1 -10  -3 2.80468 1.94472  23
  -1 -10   3 1.31639 1.72161   4
   1 -10  -3 0.74227 1.45826  23
  -1 -10   4 28.0254 4.00221   4
  -1  10   4 19.8710 3.53009  11
   1  10   4 19.0117 2.97948  19
   1  10  -4 21.7916 3.01087  16
   1  10  -4 21.8171 3.47098   8
   1 -10  -4 20.2995 3.08173  23
   1  10   4 18.2628 3.17328  11
  -1 -10  -4 20.9301 3.51732  23
  -1  10   5 126.652 8.91881  11
   1  10   5 128.361 7.85373  19
   1 -10  -5 134.613 8.39855  23
   1  10  -5 121.696 8.45111   8
  -1 -10  -5 136.736 8.92020  23
   1  10   6 19.3019 3.58675  19
  -1  10   6 19.7040 4.06009  11
  -1  10  -6 15.1825 3.71888   8
  -1 -10  -6 23.2550 4.19668  23
   1 -10  -6 18.7880 3.99326  23
   1 -11   0 370.203 14.7138  14
  -1 -11   0 368.290 14.9293   4
   1 -11   0 371.071 14.4385   4
  -1  11   0 363.094 15.5082  17
   1  11   0 351.750 14.4535  16
  -1 -11   0 339.087 14.2304   9
   1 -11   0 335.557 14.3933   9
  -1  11   0 371.712 15.2560  13
  -1  11   1 1.95464 2.08823  13
  -1  11  -1 1.04745 1.68147  17
   1  11   1 4.33404 2.03327  17
  -1  11  -1 2.87915 1.88654  16
   1  11   1 6.24681 2.15893  16
   1  11  -1 0.86092 1.44394  16
   1 -11  -1 2.22737 1.79660   4
  -1 -11  -1 5.08485 2.28293   9
  -1 -11   1-0.27533 1.80993   9
   1 -11   1 2.63681 1.50441  14
   1 -11   1 4.59111 2.10746   4
   1 -11  -1 2.42274 1.73118  14
  -1  11   1 4.61722 2.30544  17
  -1  11  -2 322.248 13.4596  16
  -1  11  -2 303.973 14.0542  17
   1  11   2 298.393 12.5067  17
   1  11   2 291.529 12.9998  16
   1 -11   2 308.827 13.5920   4
   1  11  -2 289.338 12.7439  16
   1 -11  -2 296.742 13.1141   9
   1 -11  -2 269.506 12.7196  14
  -1 -11   2 283.649 13.1449   4
  -1  11   2 289.770 13.1444  13
  -1 -11  -2 311.351 12.7862  23
  -1  11   2 290.438 13.7057  17
  -1  11   3 4.88399 2.47009  11
   1  11  -3-0.29804 1.43410  16
  -1 -11   3 0.76140 1.95270   4
   1 -11   3-2.21403 2.36401   4
  -1 -11  -3 0.32484 2.02698  23
   1  11   4 210.991 11.1176  11
   1  11   4 220.184 10.6951  19
  -1 -11   4 241.805 12.2665   4
   1  11  -4 208.300 10.4605  16
  -1  11   4 203.605 11.6661  11
   1 -11  -4 202.238 10.5169  23
  -1 -11  -4 217.704 11.3212  23
  -1  11   5 4.60356 3.02495  11
   1  11   5 1.39161 2.17235  19
   1 -11  -5 3.37516 2.34144  23
  -1 -11  -5 3.30158 2.61100  23
   1  12   0 13.3766 2.76089  16
  -1 -12   0 13.0087 2.96894   4
  -1 -12   0 13.1426 2.96672   9
   1 -12   0 16.3055 3.26656   9
   1 -12   0 15.6103 2.97915   4
   1 -12   0 14.2226 2.70159  14
  -1  12   0 15.1938 3.18153  13
  -1  12   1 3.23503 2.55736  17
   1  12   1-0.32136 2.03239  17
  -1  12  -1 1.56883 1.84400  17
   1  12   1 0.32901 1.50967  16
   1  12  -1 1.59320 1.53346  16
  -1  12   1-0.71664 2.29572  13
  -1 -12  -1-0.93420 2.09497   9
   1 -12  -1 1.38014 1.94148   4
  -1 -12   1 2.14520 2.10912   9
   1 -12   1-0.31510 1.58384  14
   1 -12  -1 2.91484 1.87967  14
   1 -12   1 3.05522 2.20267   4
  -1  12  -1 2.77388 2.50607  13
   1 -12   2 114.607 7.83584   4
  -1 -12   2 105.034 7.43688   4
   1  12   2 100.851 6.74596  17
  -1  12  -2 108.052 7.96728  17
   1  12   2 98.1027 6.99421  16
  -1  12  -2 119.249 7.78586  16
   1  12  -2 101.694 6.98060  16
   1 -12  -2 104.754 7.11698  14
  -1  12   2 99.0571 7.40283  13
   1 -12  -2 116.860 7.59258   9
  -1  12   3 110.632 8.52735  11
   1  12  -3 116.118 7.51444  16
  -1 -12   3 136.095 8.91972   4
  -1  12  -3 141.380 9.23304  17
   1 -12   3 121.084 8.40783   4
  -1  12   4 11.6105 3.32252  11
   1  12   4 17.0806 3.67238  11
  -1 -12   4 10.8126 3.25739   4
   1  12   4 17.7663 3.15579  19
   1  12  -4 12.3343 2.86592  16
  -1 -12  -4 14.1858 3.40462  23
   1  12  -4 15.1689 3.22075   8
  -1  12   5 28.0164 4.99345  11
  -1 -12  -5 45.7115 5.31400  23
  -1  13   0 1.65919 2.79043  13
   1  13   0 1.43885 1.98733  16
  -1 -13   0 0.36946 2.21012   4
  -1 -13   0 1.68651 2.24261   9
   1 -13   0-0.71931 2.63496   9
   1 -13   0 1.01075 2.07389   4
   1 -13   0 0.99948 1.74286  14
  -1 -13  -1 777.901 27.2948   4
   1  13  -1 741.576 26.7819  16
  -1  13  -1 782.138 28.4400  17
   1  13   1 761.661 26.9433  17
  -1  13   1 771.402 28.5091  17
  -1  13  -1 775.912 28.3452  13
   1 -13   1 823.891 27.7899   4
   1  13   1 789.070 27.4003  16
  -1 -13   1 770.424 27.4153   4
  -1 -13  -1 739.243 26.7722   9
  -1 -13   1 682.913 26.2101   9
   1 -13  -1 711.396 26.3448  14
  -1  13   1 750.538 27.5437  13
  -1  13  -2 691.894 25.5376  16
   1  13   2 655.845 24.4257  17
   1  13  -2 636.135 24.3544  16
   1 -13   2 714.584 25.9845   4
  -1 -13  -2 632.057 24.5615   9
   1 -13  -2 684.339 24.9962   9
   1 -13  -2 659.326 24.6289  14
  -1  13  -2 759.737 26.6683  17
  -1 -13   3 583.178 22.7390   4
  -1  13   3 561.288 22.9776  11
  -1  13  -3 595.817 23.1178  17
   1  13  -3 506.503 20.6169  16
   1 -13  -3 531.254 21.2306   9
   1 -13  -3 499.571 20.9182  14
   1  13   4-0.42423 2.61121  11
  -1  14   0 388.887 18.1869  17
   1 -14   0 404.457 16.9117   4
   1  14   0 389.296 17.0192  17
  -1  14   0 365.489 17.1417  13
  -1 -14   0 369.394 16.3402   9
   1 -14   0 366.799 16.6655   9
  -1 -14   0 369.032 16.7410   4
   1  14   0 373.507 16.7387  16
  -1  14   1 16.9174 4.14624  17
  -1  14   1 21.0041 4.42266  11
  -1  14   1 18.6119 4.16883  13
  -1 -14  -1 16.3725 3.51857   4
  -1  14  -1 19.4768 4.07590  17
   1  14   1 13.9750 3.27005  17
   1  14   1 17.1394 3.61937  16
   1  14  -1 18.7907 3.67632  16
  -1 -14  -1 15.4276 3.52773   9
  -1 -14   1 20.8603 4.02031   4
   1 -14   1 19.6592 3.64550   4
  -1  14  -1 15.7401 4.08547  13
   1 -14   2 3.99306 2.69414   4
  -1 -14  -2 1.93250 2.86053   4
   1 -14  -2 2.81048 2.57371   9
  -1  14  -2 5.01447 3.41337  13
  -2   0   0 145.624 6.07129  11
   2   0   0 167.270 5.89610  22
  -2   0   0 147.854 6.34726  15
   2   0   0 185.661 6.39348   1
   2   0   0 161.487 5.79401  14
  -2   0   0 162.273 6.19615  25
  -2   0   1 0.13663 0.95069  11
   2   0   1 0.37044 1.04463   7
   2   0  -1 0.39676 0.61822   1
   2   0   1 1.22054 1.27156   1
  -2   0  -1 0.15623 1.24146  15
  -2   0   1 0.97754 0.85529  15
  -2   0   1 0.15511 1.15848  20
   2   0  -2 312.397 10.6116  12
  -2   0   2 328.116 11.1567  19
   2   0   2 316.791 9.77530  19
  -2   0  -2 326.630 12.3382  25
   2   0   2 328.481 10.8910   5
  -2   0  -2 301.778 11.8666  15
  -2   0   2 292.152 9.48723  15
   2   0   2 332.887 11.1809   7
   2   0   2 303.236 11.8943   1
  -2   0  -2 303.046 10.0152  13
  -2   0   2 302.460 11.3327  11
  -2   0   2 316.514 11.8692  20
  -2   0   3-0.55352 1.00155  19
   2   0   3 0.19811 0.61811  19
  -2   0  -3-0.78401 2.50059  25
  -2   0  -3-0.40749 1.37057  10
  -2   0  -3 1.22096 1.54422  15
   2   0   3-0.25405 1.27675   1
   2   0  -3 0.14694 0.81174  12
  -2   0   4 1318.63 41.8341  20
  -2   0   4 1316.68 40.9751  19
   2   0   4 1365.13 39.1749  19
  -2   0   4 1355.10 40.3031   6
  -2   0  -4 1394.21 42.7849  25
   2   0  -4 1307.18 39.7657  12
  -2   0   5 1.94574 1.48184  18
  -2   0   5 0.33269 1.83804  20
  -2   0   5-0.29219 1.30672  19
   2   0   5-0.55571 1.07517  19
  -2   0   5 1.97835 1.54327   6
  -2   0  -5 3.53160 1.53589  23
   2   0   5 1.92692 2.30535   1
   2   0  -5 1.29822 1.23603  12
  -2   0   6 8.54517 2.48697  19
   2   0   6 4.44428 3.78663   1
   2   0   6 6.79019 1.82668  19
  -2   0   6 11.2296 2.59944   6
   2   0  -6 9.36529 2.37432  21
   2   0  -6 7.69163 2.01505  12
   2   0  -7-0.98133 1.98539  21
  -2   0   7 2.12789 2.43089  19
   2   0   7 0.88919 1.60912  19
  -2   0   7 2.52180 2.05783  18
   2   0   7 1.60355 4.72498   1
   2   0  -7 1.49091 1.83551  12
  -2   0  -7 0.35135 2.00699  21
   2   0   8 664.158 24.9784  19
  -2   0   8 690.141 25.6165  18
  -2   0   8 670.424 26.9072  19
  -2   0  -8 696.090 25.7298  21
   2  -1   0 1412.66 38.1345   7
   2   1   0 1437.14 38.6820   1
  -2  -1   0 1409.53 38.6350  20
  -2   1   0 1411.14 37.9512  25
   2  -1   0 1517.91 38.6371   5
   2  -1   0 1426.01 37.5855  22
   2   1   0 1480.09 37.9028  22
   2   1   0 1451.54 37.2161  14
   2  -1   0 1464.25 38.1577  14
  -2  -1   1 1562.87 45.6078  20
  -2   1   1 1655.06 45.4721  11
  -2   1  -1 1655.34 44.2101  11
   2   1   1 1595.69 44.9000   7
   2  -1   1 1828.34 46.3273   1
   2   1   1 1442.64 45.4637   1
  -2  -1  -1 1452.66 44.0279  20
  -2   1   1 1429.01 43.3481  25
  -2  -1  -1 1664.60 45.7279  10
   2  -1   1 1519.66 44.7498   7
  -2   1  -1 1654.62 45.5658  15
   2  -1   1 1584.29 44.5721  14
   2   1   1 1619.42 44.5752   5
   2  -1   1 1613.44 44.8375   5
   2   1  -1 1559.06 44.1674  22
  -2   1   2 103.472 4.74600  11
   2  -1   2 113.479 5.38049   1
  -2  -1   2 100.160 4.96514  20
   2  -1   2 103.942 4.29785   7
  -2   1   2 106.032 4.05814  19
  -2  -1   2 102.674 2.81561   4
   2  -1   2 97.6733 2.66767  19
   2   1   2 90.3289 4.93689   1
   2  -1  -2 110.788 4.05411  12
  -2  -1  -2 94.6281 4.69471  10
  -2  -1   2 93.8868 3.49565  10
   2   1   2 104.198 3.86920   5
  -2   1  -2 94.7558 4.68039  15
  -2   1  -2 94.3619 3.53739  13
   2   1  -2 101.414 3.71773  12
  -2   1  -2 98.4800 4.94990  25
   2   1  -3 710.495 21.6658  12
   2   1   3 685.987 22.2344   7
  -2  -1   3 683.639 22.7225  19
   2  -1   3 816.623 24.7111   1
   2   1   3 702.848 21.1116  19
  -2  -1   3 712.499 22.1777   6
  -2  -1   3 685.843 20.5185  10
  -2  -1  -3 712.485 22.9907  10
   2   1   3 639.746 23.3129   1
  -2   1  -3 716.019 23.3455  15
  -2   1  -3 721.468 23.6800  25
   2  -1   3 689.922 20.7982  19
  -2   1   3 690.578 22.1738  19
  -2  -1   3 671.367 23.3224  20
   2  -1  -3 710.051 21.8562  12
  -2   1   4 448.438 16.6529  11
  -2   1  -4 492.043 18.1720  25
  -2  -1   4 473.099 16.7946  19
  -2   1   4 480.803 16.4933  19
   2  -1   4 433.304 14.7130  19
  -2   1   4 429.051 15.7837   6
  -2   1  -4 483.354 17.5696  15
   2  -1  -4 449.307 15.7099  12
  -2   1   4 448.744 17.2373  20
  -2  -1   4 475.766 16.2816   6
   2   1   4 435.499 14.9808  19
  -2  -1   4 452.012 17.3936  20
   2   1  -4 447.498 15.3755  12
   2  -1  -5 608.147 21.6546  12
  -2   1   5 660.104 23.6953  20
  -2  -1   5 667.075 23.1533  19
   2  -1   5 607.529 20.7638  19
   2   1   5 642.267 21.2523  19
  -2  -1  -5 602.570 21.7863  23
  -2   1   5 649.265 22.7103  19
  -2   1   5 622.792 21.9184   6
   2   1   5 680.017 24.2834   1
  -2  -1   5 668.043 22.5277   6
  -2  -1   5 659.621 22.6963  18
  -2   1  -5 693.006 24.9302  25
   2  -1  -5 681.244 22.0364  21
   2   1  -5 647.704 21.4706  12
   2   1   6 135.038 9.13020   1
  -2  -1   6 121.199 7.87559  19
  -2   1   6 118.569 7.70821  19
   2  -1   6 116.954 6.49531  19
   2   1   6 125.718 6.74473  19
   2   1  -6 121.038 7.06615  21
  -2  -1   6 110.837 7.15379  18
  -2   1   6 113.893 7.30979  18
  -2  -1  -6 108.673 6.79721  23
  -2   1   6 107.650 6.84719   6
   2  -1  -6 120.618 7.06813  21
   2  -1  -6 115.636 6.83806  12
   2   1  -6 123.903 6.71815  12
  -2   1   6 115.413 7.92042  20
   2  -1  -7 191.290 9.85805  21
  -2   1  -7 160.853 9.45544  21
  -2  -1   7 185.640 10.9995  19
  -2   1   7 187.928 10.7280  19
   2  -1   7 182.821 9.45601  19
   2   1   7 185.197 9.43101  19
   2   1   7 235.893 14.5209   1
  -2   1   7 173.923 9.78742  18
   2  -1  -7 171.005 9.36002  12
  -2   1  -8 89.5863 7.14048  21
   2   1   8 75.3394 11.7552   1
  -2  -1   8 75.5080 7.45380  19
   2  -1   8 76.1859 6.30636  19
   2   1   8 78.4027 6.39677  19
  -2  -1   8 71.7130 6.41828  18
  -2   1   8 70.6944 6.17273  18
  -2   1   8 88.9134 7.69664  19
  -2  -1  -8 65.8499 6.39791  21
   2  -1  -8 82.9947 6.69688  21
   2  -1  -8 66.2380 6.05841  12
   2  -2   0 30.7692 1.85029  22
  -2   2   0 31.8360 2.33332  11
   2  -2   0 32.5338 2.25002   7
   2   2   0 32.5954 2.10082  22
   2  -2   0 32.2698 2.38603   5
   2   2   0 30.0564 1.39447  14
   2  -2   0 34.8985 2.47160  14
   2   2  -1 40.8384 2.44812  22
  -2   2   1 47.2385 3.26711  11
  -2   2  -1 46.9299 2.53894  11
  -2  -2   1 49.2247 3.48599  20
  -2   2   1 42.8997 2.30125  19
   2  -2   1 42.4275 1.50462  19
  -2  -2   1 40.4307 2.91713  10
  -2  -2  -1 45.3201 3.43360  10
   2  -2  -1 42.3744 2.40981   7
   2  -2  -1 42.3440 2.55081  12
   2  -2  -1 44.0488 1.96097   9
   2  -2   1 41.2985 2.79483   7
   2   2   1 41.7023 2.66113   5
   2  -2   1 41.8079 2.82553  14
  -2   2  -1 41.2059 2.87240  13
   2  -2   1 38.8158 2.75540   5
   2   2  -1 40.8159 2.48124   8
   2   2   2 9363.66 261.366   7
  -2   2   2 11785.4 263.862  11
  -2  -2   2 9511.07 262.816  20
   2   2   2 10523.8 263.618   1
  -2  -2   2 9462.11 260.192   4
  -2   2   2 9764.92 260.737  19
   2  -2   2 9490.31 259.399  19
  -2   2  -2 9267.65 260.232  17
  -2  -2   2 9266.62 260.743  10
  -2  -2  -2 9829.14 262.595  10
  -2   2  -2 9539.50 260.951  13
   2   2   2 9606.61 259.274  16
   2  -2   2 7379.85 264.628   1
   2   2   2 9634.26 260.657   5
  -2   2  -2 9776.97 262.153  25
   2   2  -2 9169.11 261.021   8
   2   2   3 329.594 11.0622   7
   2  -2   3 306.042 9.32724  19
   2   2   3 322.079 12.7159   1
  -2   2   3 337.078 10.8637  19
  -2  -2   3 312.136 9.30443  10
  -2  -2  -3 343.714 12.1246  10
   2   2   3 306.044 8.14514  11
   2   2   3 335.070 10.2178  19
   2  -2   3 375.798 17.6253   1
  -2   2  -3 362.382 12.5357  25
  -2   2  -3 349.620 12.1776  15
  -2  -2   3 333.790 11.0651   6
   2   2  -3 341.603 11.0546   8
   2   2  -3 329.172 10.3651  12
   2  -2  -3 320.273 10.7388  12
  -2  -2   4 8.65115 1.81890  18
  -2   2   4 6.51973 1.86132  11
   2  -2  -4 8.29078 1.81760  21
  -2  -2   4 6.43146 1.83145  19
  -2   2   4 7.36722 1.70878  19
   2  -2   4 8.32510 1.37148  19
   2   2   4 9.36930 2.10678   7
   2   2   4 7.78300 1.51189  19
   2  -2   4-0.53690 1.17357   2
  -2   2   4 4.15454 1.63492   6
  -2  -2   4 10.5250 2.11235   6
  -2  -2  -4 5.21019 1.95301  10
  -2   2  -4 5.87344 2.11528  15
  -2   2  -4 7.29992 3.01389  25
  -2   2   4 8.91214 2.27172  20
   2  -2  -4 9.32247 1.73496  12
   2   2  -4 7.74285 1.47347  12
  -2   2   5 106.331 6.73851  11
   2  -2  -5 99.5622 5.89276  21
  -2   2   5 115.587 7.32047  20
   2  -2   5 95.9045 5.34773  19
  -2  -2   5 106.807 6.95601  19
  -2   2   5 100.017 6.34575  19
   2  -2  -5 114.376 6.25293  12
  -2   2   5 101.214 5.94970   6
  -2  -2   5 99.8119 6.36298   6
  -2  -2  -5 99.6300 6.30127  23
  -2   2  -5 114.840 8.08087  25
   2   2   5 101.665 5.69754  19
   2   2   5 94.6624 7.12929   1
  -2  -2   5 108.044 6.53913  18
   2   2  -5 104.042 5.64771  12
  -2   2   6 1872.72 57.6068  20
   2   2   6 1874.03 55.4002  19
  -2  -2   6 1828.79 57.6414  19
  -2   2   6 1855.85 56.8166  19
   2  -2   6 1796.51 54.8963  19
   2  -2  -6 1964.16 55.8839  21
  -2   2   6 1835.12 56.5101  18
   2  -2  -6 1844.38 55.8880  12
  -2  -2   6 1872.03 56.4999  18
  -2  -2  -6 1790.69 55.9963  23
   2   2   6 1855.84 58.8579   1
  -2   2  -6 1945.82 59.6962  25
   2   2   7 236.140 13.4562   1
  -2   2  -7 199.184 10.6696  21
  -2   2   7 215.377 11.8919  20
  -2  -2   7 265.642 13.1846  19
  -2   2   7 221.566 11.8859  19
   2  -2   7 206.449 10.4011  19
   2   2   7 219.111 10.4839  19
   2  -2  -7 226.591 10.9815  21
  -2  -2   7 210.760 11.2042  18
  -2   2   7 195.281 10.6167  18
   2  -2  -7 210.507 10.7094  12
  -2  -2  -7 204.451 10.7376  23
   2  -2  -8 5.28619 2.84860  21
  -2   2  -8 4.23757 2.71161  21
  -2  -2   8 4.21878 2.96518  19
  -2   2   8 5.90399 3.03037  19
   2   2   8 2.21809 2.18143  19
  -2   2   8 4.29089 2.37005  18
   2   2   8 6.50534 5.29655   1
   2  -2  -8 3.73758 2.45763  12
  -2   3   0 625.531 18.9960  11
   2  -3   0 601.425 18.4248   7
   2  -3   0 601.465 18.8979   5
   2  -3   0 609.771 19.2331  14
  -2   3   0 624.575 19.5138  13
   2   3   0 600.115 17.6565   8
  -2   3  -1 11.5827 1.44086  11
   2  -3   1 15.0141 1.83285   5
   2  -3   1 13.7429 1.09156  22
   2  -3  -1 10.0466 1.27375  12
  -2   3   1 11.4407 1.10888  19
  -2   3   1 12.5121 1.76481  11
  -2  -3   1 13.3791 1.77942  10
  -2  -3  -1 10.5363 1.87574  10
  -2   3  -1 10.7885 1.69399  13
   2  -3  -1 11.4709 1.20077   9
  -2  -3   1 12.8167 1.12218   9
   2  -3  -1 10.0090 1.20403   7
   2  -3   1 13.8950 1.74050  14
   2   3  -1 12.5832 1.38836   8
   2   3  -1 11.5712 1.33142  22
   2   3  -2 441.864 14.4566  22
  -2   3   2 468.005 16.0175  11
  -2   3  -2 495.654 15.4712  13
   2  -3   2 439.364 13.4945  19
  -2  -3   2 432.819 14.6831  10
  -2  -3  -2 460.079 16.5491  10
  -2   3  -2 496.821 14.8399  17
   2   3  -2 475.432 15.1233   8
   2   3   2 450.116 13.7510  16
  -2   3  -2 502.512 16.3705  25
   2   3   2 442.195 15.2694   7
   2   3   2 462.075 14.4449   5
  -2   3   2 485.480 14.6934  19
   2  -3  -2 460.011 14.9659  12
  -2  -3   2 482.671 14.7079   4
   2   3   3 19.3104 2.48664   7
   2   3   3 26.5166 3.75771   1
  -2   3   3 22.4885 2.22390  19
  -2  -3   3 22.9053 1.85077  10
  -2  -3   3 21.5606 2.38537  18
  -2  -3   3 26.0841 2.27382   4
  -2  -3  -3 22.7776 2.91904  10
   2  -3   3 20.5920 1.73973  19
  -2  -3   3 21.5032 2.44077   6
  -2   3  -3 23.0251 3.45324  25
  -2   3   4 397.369 15.1844  11
  -2   3  -4 392.960 15.2741  25
   2   3   4 364.485 13.4518   7
   2  -3   4 347.580 12.2621  19
  -2   3   4 369.439 13.5704  19
   2   3  -4 380.523 13.8523   8
  -2  -3  -4 343.356 14.1599  10
  -2  -3   4 357.629 13.8404  18
  -2  -3   4 362.098 13.8612   6
  -2   3  -4 365.695 14.7261  15
   2  -3  -4 369.782 13.0775  21
   2   3  -4 350.606 12.6233  12
   2   3   4 350.429 12.8679  19
   2  -3  -4 361.955 13.5248  12
  -2   3  -5 43.9619 5.11413  25
   2  -3  -5 42.3598 3.88917  12
  -2   3   5 35.9223 4.23867  20
   2  -3   5 37.3830 3.20241  19
   2   3   5 35.6382 3.34039  19
  -2  -3   5 39.1096 3.78563  18
   2   3   5 42.5339 4.87347   1
  -2  -3   5 40.4478 4.09326   6
   2  -3  -5 49.3572 3.88179  21
  -2   3   5 39.5392 3.84834  19
  -2  -3  -5 37.6631 3.96245  23
  -2   3   5 40.1387 4.39596  11
   2   3  -5 53.0273 4.38727   8
   2  -3  -6 219.133 10.0197  21
  -2   3  -6 187.581 9.55728  21
   2  -3   6 202.007 9.33558  19
  -2   3   6 215.304 10.6990  19
  -2   3   6 220.650 11.4990  20
   2   3   6 205.215 9.76037  19
  -2  -3   6 202.812 10.4128  18
  -2   3   6 215.476 10.4419  18
  -2   3   6 189.629 10.4318  11
   2   3   6 212.115 11.8438   1
  -2   3  -6 206.349 12.1691  25
  -2  -3  -6 213.248 10.5300  23
   2  -3  -6 200.818 10.2047  12
   2   3   7 19.4379 4.38840   1
   2  -3  -7 11.2512 2.87139  21
  -2   3  -7 8.85603 2.62332  21
   2  -3   7 11.0662 2.57909  19
  -2   3   7 7.66354 2.96988  19
   2   3   7 12.2283 2.53166  19
  -2  -3   7 10.1331 2.73861  18
  -2   3   7 11.3898 2.67484  18
  -2  -3  -7 9.05580 2.74685  23
   2  -3  -7 14.2957 3.09133  12
  -2   3  -8 101.776 7.47436  21
   2   3   8 118.908 10.2217   1
   2   3   8 103.021 7.55504  19
  -2   3   8 107.343 7.63936  18
   2  -3  -8 124.758 8.15956  21
  -2   4   0 5728.02 158.864  11
   2  -4   0 5687.49 159.251  14
   2   4   0 5657.17 157.454   8
   2  -4   0 5763.10 158.530   5
  -2   4   0 5838.07 159.461  13
   2  -4   0 5864.76 157.391  12
  -2   4   1 2142.92 62.8947  11
   2   4  -1 2096.71 61.4219  22
  -2   4  -1 2227.14 62.0151  11
  -2   4  -1 2230.82 62.8682  13
   2  -4   1 2246.72 60.4255  22
  -2  -4   1 2101.13 62.6136  10
  -2  -4  -1 2010.14 63.2294  10
  -2   4  -1 2221.67 62.3795  17
   2  -4  -1 2293.59 61.3493   9
  -2  -4   1 2202.46 60.9840   9
   2  -4  -1 2122.36 61.8621   5
   2  -4   1 2172.09 62.8235  14
   2   4   1 2168.26 60.2261   8
   2   4  -1 2321.09 61.7985   8
   2  -4  -1 2223.89 61.6140  12
   2  -4   1 2180.73 62.4359   5
   2   4  -2 949.976 29.7242  22
  -2   4   2 1011.36 31.6162  11
  -2  -4   2 1094.70 30.4846   4
  -2  -4   2 1006.89 30.7470   6
  -2  -4   2 1001.00 30.4512  10
  -2  -4  -2 969.473 31.9317  10
  -2  -4   2 980.485 30.4470  18
   2   4   2 1002.44 30.8900   7
  -2   4  -2 1077.27 30.4683  17
   2   4   2 998.617 29.3684  16
   2   4   2 1038.12 29.4896   5
   2   4  -2 1057.67 30.6776   8
  -2   4  -2 1090.37 31.4256  13
   2  -4  -2 1048.97 30.5055  12
   2   4   3 526.914 17.0714   7
   2  -4   3 453.868 15.4810  19
  -2   4   3 523.373 16.5475  19
  -2  -4   3 532.255 16.6838   4
  -2  -4  -3 496.851 18.3238  10
  -2  -4   3 528.210 17.3946  18
   2   4   3 485.473 15.3077  16
  -2  -4   3 519.314 15.8036  10
  -2   4  -3 524.390 18.7570  25
   2   4   4 2108.12 60.7049   7
   2  -4   4 2010.03 59.6202  19
  -2   4   4 2075.48 60.7679  19
   2   4   4 2035.12 60.5340  19
  -2  -4  -4 2093.86 62.5333  10
  -2  -4   4 2044.27 61.3277  18
  -2  -4   4 2012.84 61.4837   6
  -2   4  -4 2220.86 62.9714  15
   2   4  -4 2050.09 61.2575   8
  -2   4  -4 2220.73 63.0293  25
   2  -4  -5 1522.99 43.3371  21
  -2   4   5 1501.75 45.8056  11
  -2   4   5 1414.28 45.4353  20
   2  -4   5 1400.14 42.6313  19
  -2   4   5 1431.89 44.1075  19
   2   4   5 1358.23 43.1390  19
   2   4   5 1458.91 47.0240   1
  -2  -4   5 1423.46 44.2751  18
   2   4  -5 1483.47 44.6160   8
  -2  -4   5 1413.88 44.6608   6
  -2   4  -5 1512.80 46.5610  25
  -2  -4  -5 1382.66 44.7514  23
  -2   4  -6 201.447 10.8930  25
   2  -4  -6 205.497 8.18732  21
  -2   4   6 193.400 9.70915  20
   2   4   6 193.180 10.5352   1
  -2   4   6 175.831 8.49492  19
  -2   4   6 196.044 9.39186  11
  -2   4   6 186.623 8.38324  18
   2   4   6 185.675 8.00579  19
  -2   4  -6 183.163 7.81546  21
  -2  -4  -6 188.566 9.02970  23
   2   4  -6 201.316 9.18548   8
  -2  -4   6 183.414 8.55236  18
   2  -4  -7 78.1474 5.98525  21
  -2   4  -7 71.6974 5.70230  21
  -2  -4  -7 62.8853 6.03466  23
  -2   4   7 80.6963 6.65989  19
   2   4   7 81.4473 6.17542  19
  -2  -4   7 69.3017 6.05074  18
  -2   4   7 70.0161 5.81023  18
   2  -4  -7 66.5292 5.93588  12
  -2   4   7 64.5407 6.11453  11
   2   4   7 72.9592 7.43149   1
   2  -4  -8 342.468 14.9859  21
  -2   4   8 298.103 14.3436  18
   2   4   8 332.491 17.8890   1
  -2   5   0 70.6748 4.22789  11
   2  -5   0 66.2323 3.79896   5
   2  -5   0 69.8117 3.67347   9
   2   5   0 63.9025 3.30176   8
   2  -5   0 59.3368 4.11144  14
  -2   5   0 66.1546 4.42403  13
   2  -5   0 72.0158 3.14675  12
  -2   5  -1 1144.53 31.7211  11
  -2  -5   1 1042.82 32.1230  10
  -2  -5  -1 1001.40 32.8598  10
  -2   5  -1 1066.29 31.8178  17
   2   5  -1 1046.89 30.6119  22
   2  -5  -1 991.158 29.6493   4
   2   5   1 1059.23 30.6522  16
   2  -5  -1 1053.49 30.7581   9
  -2  -5   1 1026.84 30.3698   9
   2  -5   1 1046.67 32.1609  14
  -2   5   1 1016.67 32.0246  11
   2  -5  -1 967.858 30.7696   5
   2   5  -1 1080.70 31.0698   8
  -2   5  -1 1083.58 32.2531  13
   2  -5  -1 1076.68 30.6966  12
   2  -5   1 1071.71 29.2100  22
  -2   5   2 112.069 6.32448  11
  -2  -5   2 116.100 5.67859   4
   2   5  -2 120.333 5.13088  22
  -2  -5   2 123.093 5.92609  10
   2  -5  -2 125.086 4.10024   4
  -2  -5  -2 109.200 6.69458  10
  -2  -5   2 112.817 5.52636  18
  -2  -5   2 112.973 5.69809   6
  -2   5  -2 117.289 5.77744  17
   2  -5  -2 126.549 5.72323  12
   2   5   2 118.635 5.05209  16
   2   5  -2 116.978 5.80144   8
   2   5   2 119.767 4.71829   5
  -2  -5   3 921.216 29.2704   6
   2   5   3 936.496 28.7831   7
  -2  -5   3 958.564 28.8845   4
  -2  -5  -3 946.472 30.7936  10
  -2  -5   3 928.307 28.9121  18
   2   5   3 931.772 27.4289  16
   2   5  -3 945.560 29.1889   8
  -2  -5   3 908.204 27.6822  10
  -2   5   4 4.15961 1.91540  11
   2   5   4 1.56395 1.44807   7
  -2   5   4 6.09417 1.81822  19
  -2  -5   4 2.82168 1.46199   4
  -2  -5   4 2.33856 1.35912  18
  -2  -5  -4 3.86524 1.78097  10
  -2  -5   4 1.28614 1.39829   6
  -2   5  -4 1.66599 2.24264  25
   2  -5  -5 446.561 15.5833  21
   2   5   5 433.004 19.3847   1
  -2   5   5 420.529 16.1338  19
   2   5   5 436.634 15.7458   7
  -2  -5   5 429.041 16.5553  18
  -2  -5  -5 405.742 17.2280  23
  -2   5  -5 424.514 17.9566  25
   2   5  -5 396.026 16.4006   8
   2  -5  -6 18.4278 2.92889  21
  -2   5   6 9.47509 2.91678  11
   2   5   6 11.2057 3.78675   1
  -2   5   6 10.2632 2.47797  19
   2   5   6 15.4347 2.73272  19
  -2  -5   6 15.1126 2.78182  18
  -2   5  -6 16.6617 4.30186  25
  -2   5   6 11.4444 3.21546  20
   2   5  -6 19.5739 3.24910   8
  -2  -5  -6 13.9347 2.94115  23
   2  -5  -7 394.810 15.4497  21
  -2   5   7 358.145 16.4059  11
  -2   5   7 356.158 16.2399  19
   2   5   7 330.965 15.2348  19
  -2   5   7 351.315 15.3564  18
   2  -5  -7 351.488 15.8937  12
   2   5   7 361.840 17.9188   1
  -2  -5  -7 357.504 16.2741  23
   2   5   8 1.84341 3.56616   1
  -2   6   0 112.217 6.02797  11
  -2  -6   0 105.941 6.34783  10
  -2   6   0 111.270 6.22134  17
   2  -6   0 111.168 5.39820   9
   2  -6   0 106.569 4.91698   4
   2  -6   0 116.778 6.20386  14
  -2   6   0 113.221 6.38346  13
   2  -6   0 122.256 4.51912  12
  -2   6  -1 333.277 12.6629  13
  -2   6   1 317.843 12.4667  11
  -2  -6   1 308.490 12.3751  10
  -2  -6  -1 314.722 13.1519  10
  -2  -6   1 306.816 11.0656   6
  -2   6  -1 341.049 12.3104  17
   2  -6  -1 319.012 10.3600   4
   2   6   1 307.190 11.0236  16
   2  -6  -1 320.189 11.3373   9
  -2  -6   1 300.134 10.9388   9
   2  -6   1 318.455 12.4174  14
   2   6  -1 331.038 11.5423   8
  -2   6   1 288.542 12.3387  13
   2  -6  -1 306.604 10.8309  12
   2  -6   1 334.285 9.34219  22
  -2   6   2 519.965 18.8518  11
   2  -6  -2 549.818 15.9935   4
  -2  -6   2 520.393 17.8571  10
  -2  -6  -2 543.205 19.8325  10
  -2  -6   2 549.089 17.9122   6
  -2   6  -2 545.937 18.3071  17
   2   6   2 505.111 17.0139  16
   2  -6   2 522.121 18.7375  14
   2   6  -2 539.141 18.0751   8
  -2  -6   2 568.875 18.1937   4
   2   6   3 302.034 11.5187   7
  -2  -6   3 297.293 11.7151   4
  -2  -6  -3 309.504 13.4027  10
  -2  -6   3 301.091 11.4913  18
  -2  -6   3 295.407 11.9052   6
   2   6   3 301.468 10.6636  16
   2   6  -3 308.346 12.1680   8
  -2   6   4 5.95189 2.25756  11
   2   6   4 6.94627 1.90790   7
  -2   6  -4 4.32899 2.54377  25
   2   6   4 6.97156 1.79646  19
  -2  -6   4 5.96798 1.70660  18
  -2  -6  -4 7.65077 2.40023  10
  -2  -6   4 8.62207 2.16662   6
  -2  -6   4 7.56550 1.94797   4
   2   6  -5 142.758 8.24982   8
  -2   6   5 173.005 10.1432  11
   2   6   5 147.128 11.1380   1
  -2  -6   5 142.910 8.10107  18
  -2  -6  -5 157.726 9.10122  23
  -2   6  -5 139.272 9.24838  25
  -2   6  -6 468.015 21.3892  25
  -2   6   6 551.970 21.6462  11
  -2   6   6 530.143 21.3070  20
   2   6   6 531.960 23.0725   1
  -2  -6  -6 508.921 20.7763  23
   2   6  -6 528.379 20.3870   8
  -2   6   7 98.4046 7.96808  11
   2   6   7 88.7215 6.95547  19
   2   6   7 100.571 9.10597   1
   2   6  -7 102.745 7.79940   8
  -2  -6  -7 89.8101 7.45613  23
  -2   7   0 415.225 15.2382  11
  -2  -7   0 411.028 15.7598  10
  -2  -7   0 396.923 13.0439   6
  -2   7   0 415.219 15.3592  17
   2  -7   0 398.345 13.6818   4
   2   7   0 393.781 14.0117  16
   2  -7   0 408.069 14.2341   9
  -2   7   0 383.233 15.2506  13
   2  -7   0 426.005 12.6567  12
  -2   7   1 160.485 8.17671  11
  -2  -7   1 153.570 7.93251  10
  -2  -7  -1 175.034 8.91280  10
  -2  -7   1 158.855 6.74915   6
   2  -7  -1 170.074 6.50034   4
  -2   7  -1 155.173 7.82112  17
   2   7   1 159.828 6.97204  16
   2  -7  -1 169.020 7.32780   9
  -2  -7   1 147.662 6.76593   9
  -2   7  -1 159.054 8.23153  13
  -2   7   1 159.734 8.30633  13
   2  -7  -1 156.044 6.52103  12
  -2  -7   2 946.494 29.8784   4
  -2  -7   2 937.115 29.5805  10
  -2  -7  -2 977.707 31.7895  10
  -2   7  -2 981.412 30.2164  17
  -2  -7   2 913.182 29.1102   6
   2   7   2 918.844 28.6419  16
   2   7  -2 960.262 29.6539   8
  -2   7   2 962.986 30.8834  11
   2   7   3 235.295 9.55876   7
  -2  -7  -3 221.267 11.2036  10
  -2  -7   3 232.004 9.99873   4
  -2   7  -3 247.916 10.4018  17
   2   7   3 212.563 8.88204  16
  -2  -7   3 216.216 9.72782   6
   2   7  -3 223.524 10.0808   8
  -2   7   4 339.442 14.5964  11
   2   7   4 305.275 12.7982  19
  -2  -7  -4 319.988 14.4713  10
  -2  -7   4 336.487 13.5133   4
   2   7  -4 310.016 13.2870   8
   2   7   5 41.4279 7.23319   1
  -2   7  -5 48.2026 5.66156  25
   2   7   5 49.3620 4.47805  19
  -2   7   5 56.5000 5.84209  11
  -2  -7  -5 49.6207 5.17570  23
  -2   7  -6 244.546 14.3637  25
  -2   7   6 325.727 15.7215  11
   2   7   6 310.365 16.7036   1
   2   7   6 291.941 13.2941  19
  -2  -7  -6 286.231 14.4819  23
   2   7  -6 296.467 13.7209   8
   2   7   7 101.567 9.29440   1
  -2  -7  -7 98.2535 8.00588  23
  -2   8   0 2399.89 67.1527  11
  -2  -8   0 2229.40 66.9382  10
  -2   8   0 2336.37 66.9114  17
   2  -8   0 2402.99 64.8748   4
   2   8   0 2170.06 64.9297  16
  -2  -8   0 2167.06 64.8396   9
   2  -8   0 2238.57 65.2885   9
   2  -8   0 2208.27 66.5171  14
  -2   8   1 366.753 14.4890  11
  -2  -8   1 335.303 13.9609  10
  -2  -8  -1 339.955 14.7407  10
   2  -8  -1 385.039 12.4669   4
  -2   8  -1 373.366 14.5127  17
  -2  -8   1 355.216 12.3647   6
   2   8   1 357.562 12.9715  16
   2   8  -1 358.093 13.2009  16
   2  -8  -1 342.785 13.1818   9
   2  -8   1 351.335 14.1650  14
   2  -8  -1 317.098 13.8624  14
  -2   8   1 333.367 14.3703  13
  -2   8  -1 379.155 14.6994  13
   2  -8  -1 353.346 12.0904  12
  -2   8   2 263.794 11.7211  11
  -2  -8   2 240.547 10.4724   4
  -2  -8  -2 244.122 11.7088  10
  -2   8  -2 231.365 10.5867  17
  -2  -8   2 245.324 9.78831   6
  -2   8  -2 252.263 11.5296  13
   2   8   2 220.755 9.40847  16
   2  -8  -2 241.864 10.0860   9
   2  -8   2 211.953 10.5725  14
   2   8  -2 234.946 10.2419   8
  -2  -8  -3 829.163 28.1594  10
  -2  -8   3 803.819 26.2199   4
  -2   8  -3 854.880 26.8045  17
   2   8   3 725.911 24.6661  16
  -2  -8   3 764.819 25.5884   6
   2   8   3 782.827 25.1134   7
   2   8  -3 760.041 26.0605   8
  -2   8   4 1096.45 38.2912  11
  -2  -8  -4 1177.92 38.8330  10
   2   8   4 1154.33 36.5944  19
  -2  -8   4 1219.55 37.6187   4
  -2  -8  -4 1143.10 38.1565  23
   2   8  -4 1172.01 37.3502   8
  -2   8   5 7.25941 2.74161  11
   2   8   5 9.72927 2.29904  19
  -2   8  -5 5.69137 3.26877  25
  -2  -8   5 3.72479 2.25840   4
  -2   8   6 54.8887 6.72818  11
   2   8   6 43.9352 4.74379  19
   2   8  -6 51.1235 5.23049   8
  -2   8  -6 26.9448 5.31583  25
   2   8   6 31.3630 6.45514   1
  -2  -8  -6 38.9414 5.27001  23
  -2   9   0 334.298 13.8820  11
  -2  -9   0 301.156 13.6832  10
  -2   9   0 339.009 14.0892  17
   2  -9   0 325.291 12.2197   4
   2   9   0 309.524 12.4055  16
  -2  -9   0 323.807 12.3893   9
   2  -9   0 320.313 12.6880   9
   2  -9   0 297.253 13.2631  14
  -2   9   0 329.261 14.0869  13
  -2   9   1 30.2242 3.78742  11
  -2  -9  -1 27.9203 3.67895  10
  -2   9  -1 30.0196 3.71304  17
   2   9   1 29.3511 3.02348  16
   2   9  -1 32.1224 3.10965  16
   2  -9   1 37.5850 3.54038   4
   2  -9  -1 39.8051 3.71024   9
   2  -9   1 31.9724 3.59771  14
   2  -9  -1 31.2362 3.69706  14
  -2   9   1 36.5349 4.22912  13
   2  -9  -1 33.1096 2.92153   4
  -2   9  -1 35.5697 4.11695  13
  -2   9   2 380.591 15.5798  11
  -2  -9   2 378.401 14.7137   4
  -2  -9  -2 335.092 15.5044  10
  -2   9  -2 389.513 15.2992  17
   2   9   2 327.539 13.3983  16
   2   9  -2 358.980 13.9630  16
   2  -9  -2 364.516 14.0976   9
   2  -9   2 345.276 14.7897  14
  -2   9  -2 399.833 15.9942  13
  -2  -9  -3 85.8711 6.86879  10
  -2  -9   3 94.0438 6.30741   4
  -2   9  -3 92.5486 6.52192  17
   2   9   3 80.3980 5.26232  16
   2   9  -3 90.7660 6.15414   8
  -2   9   4 213.774 11.8274  11
  -2  -9  -4 236.751 12.2891  10
   2   9   4 222.402 10.5394  19
  -2  -9   4 231.583 11.3829   4
   2   9  -4 208.716 10.7844   8
  -2  -9  -4 221.200 11.6224  23
  -2   9   5 0.92685 2.32929  11
   2   9   5 0.32664 1.86603  19
  -2  -9   5 0.74689 2.23414   4
   2   9  -5 3.30271 2.25902   8
  -2  -9  -5 2.14973 2.49528  23
  -2   9   6 181.246 11.8380  11
   2   9   6 103.937 10.8934   1
  -2  -9  -6 164.933 10.5652  23
   2   9   6 159.097 9.16750  19
  -2   9  -6 103.049 9.58714  25
  -2  10   0 2534.37 71.5956  11
  -2  10   0 2370.18 71.3921  17
   2 -10   0 2556.29 69.0364   4
   2  10   0 2293.89 68.9928  16
  -2 -10   0 2289.85 68.7552   9
   2 -10   0 2367.85 69.5098   9
   2 -10   0 2201.84 70.2241  14
  -2  10   0 2377.70 71.2948  13
  -2 -10   1 404.553 15.8145   4
  -2  10   1 415.355 16.9319  11
  -2  10  -1 400.804 16.4628  17
   2  10   1 379.416 14.7869  16
   2  10  -1 355.989 14.5865  16
   2 -10   1 390.313 15.1128   4
   2 -10  -1 411.033 15.4233   9
   2 -10   1 378.162 15.8207  14
   2 -10  -1 363.119 15.8239  14
  -2  10   1 400.396 16.7119  13
  -2  10  -2 133.339 8.48198  13
  -2  10   2 123.990 8.35174  11
  -2 -10   2 119.523 7.50554   4
  -2 -10  -2 124.900 8.46033  10
  -2  10  -2 117.223 7.70668  17
   2  10   2 120.741 6.55706  17
   2  10   2 108.354 6.67463  16
   2  10  -2 121.612 6.92559  16
   2 -10  -2 127.480 7.25928   9
   2 -10  -2 111.022 7.57371  14
  -2 -10  -3 679.188 25.0255  10
  -2 -10  -3 636.236 23.8014  23
  -2 -10   3 666.027 23.6616   4
  -2  10  -3 700.655 24.2268  17
   2  10   3 626.808 22.0909  16
   2  10  -3 635.430 22.4324  16
   2  10  -3 588.564 22.6675   8
   2  10   4 1281.33 41.8826  19
  -2 -10   4 1408.96 43.5880   4
   2  10  -4 1294.60 41.5660  16
   2  10  -4 1296.33 42.6574   8
  -2  10   4 1372.08 44.6529  11
  -2 -10  -4 1358.87 43.6450  23
  -2  10   5 80.6965 7.45689  11
   2  10   5 66.7492 5.82748  19
   2  10  -5 68.1918 5.50635  16
  -2 -10   5 63.3552 6.21414   4
  -2 -10  -5 79.8561 7.15347  23
   2  10  -5 70.4190 6.20038   8
  -2  10   6 7.73225 3.63392  11
  -2  11   0 0.39288 2.51806  11
  -2  11   0 1.20838 2.18776  17
  -2  11   0 2.00337 2.32634  13
   2  11   0 2.82234 1.76273  16
  -2 -11   0 3.46022 2.08084   9
   2 -11   0 2.10451 1.85201   9
   2 -11   0 1.85571 1.80549   4
  -2  11   1 333.230 15.5668  11
  -2  11  -1 366.512 15.8585  17
   2  11   1 307.382 13.2850  16
   2  11  -1 319.491 13.6218  16
   2 -11   1 341.528 13.9500   4
   2 -11  -1 319.287 13.8161   9
  -2  11  -1 324.074 15.2110  13
   2 -11   1 321.714 14.4063  14
   2 -11  -1 319.200 14.6063  14
  -2  11   1 349.720 15.6132  13
  -2 -11   1 345.441 14.5617   4
  -2  11   2 100.973 7.88706  11
  -2 -11   2 112.236 7.32079   4
  -2  11  -2 117.130 7.88408  17
   2  11   2 97.4487 6.51743  16
   2  11  -2 91.7619 6.32400  16
   2 -11  -2 104.031 6.99606   9
   2 -11  -2 90.4259 6.99065  14
  -2  11  -2 117.270 8.43546  13
  -2 -11   3 237.480 12.1313   4
  -2  11  -3 272.643 12.8453  17
   2  11   3 230.865 10.9794  16
   2  11  -3 226.746 10.9663  16
   2 -11  -3 253.417 11.7247   9
   2  11  -3 215.837 11.2433   8
  -2 -11  -3 238.498 12.1602  23
  -2  11  -3 247.560 13.2957  13
  -2  11   4 4.96530 3.22661  11
   2  11   4 9.09387 2.54549  19
   2  11  -4 10.0659 2.54734  16
  -2 -11   4 4.99648 2.93391   4
   2  11  -4 5.24799 2.43884   8
  -2 -11  -4 4.61723 2.72937  23
  -2  11   5 219.556 13.0252  11
   2  11  -5 194.537 10.4540  16
  -2 -11   5 188.566 11.7368   4
   2  11  -5 215.520 11.6298   8
  -2 -11  -5 220.380 12.4544  23
  -2  12   0 14.0792 3.38473  11
  -2  12   0 9.34704 3.29993  17
   2  12   0 5.34689 2.10254  16
  -2 -12   0 9.52493 2.58228   9
   2 -12   0 6.88409 2.42848  14
  -2  12   0 8.08217 3.09771  13
  -2 -12   1 205.241 11.0294   4
  -2  12  -1 213.936 12.0669  17
   2  12   1 201.469 10.2511  16
   2  12  -1 204.715 10.4496  16
   2 -12   1 212.410 10.7740   4
  -2 -12  -1 212.320 10.5898   9
  -2  12   1 234.889 12.4808  11
   2 -12  -1 201.600 10.5465   9
   2 -12   1 195.856 10.9125  14
   2 -12  -1 192.888 10.9620  14
  -2  12  -1 208.673 12.1656  13
  -2  12   1 220.820 12.0707  13
  -2  12   2 21.9797 4.37423  11
  -2  12  -2 16.8759 3.86290  17
   2  12   2 27.8744 3.78141  16
   2  12  -2 22.2936 3.30341  16
  -2 -12   2 29.8322 4.20129   4
   2 -12  -2 24.7527 3.81438   9
   2 -12  -2 19.6078 3.75372  14
  -2 -12   3 140.335 9.11597   4
  -2  12  -3 144.583 9.52406  17
   2  12  -3 128.263 8.08688  16
   2 -12  -3 147.029 8.74871   9
   2  12  -3 120.972 7.99796   8
   2 -12  -3 121.033 8.86433  14
  -2  12  -3 129.414 9.60341  13
  -2 -12  -3 134.648 8.84169  23
  -2  12   4 28.5261 4.94643  11
   2  12   4 32.6927 4.16969  19
   2  12  -4 34.7577 4.22096  16
   2 -12  -4 26.5739 4.44363   9
   2  12  -4 31.5733 4.43782   8
  -2 -12   4 28.4184 4.58501   4
  -2 -12  -4 29.2464 4.61881  23
  -2  13   0 382.263 18.1017  11
  -2  13   0 420.946 18.8647  17
   2  13   0 371.083 16.1888  16
   2 -13   0 366.581 16.7248  14
  -2  13   0 410.664 18.4532  13
  -2  13   1 0.99576 2.70268  11
  -2  13  -1-0.47633 2.84930  11
  -2  13  -1 0.48939 2.79529  17
   2  13   1 1.41582 2.14822  16
   2  13  -1-1.77122 2.29842  16
  -2 -13   1-0.40218 2.40577   4
  -2 -13  -1 4.36305 2.68908   9
   2 -13  -1 0.36909 2.48290   9
   2 -13   1 1.21032 2.06942  14
   2 -13  -1 0.41567 2.25643  14
  -2  13  -1 2.46027 2.81051  13
  -2  13   1 3.79089 3.15041  13
  -2  13   2 172.405 11.6039  11
  -2 -13   2 178.629 10.5061   4
  -2  13  -2 168.498 10.8718  17
   2  13   2 156.661 9.34851  16
   2  13  -2 154.263 9.29900  16
  -2 -13  -2 153.093 9.45457   9
   2 -13  -2 176.050 10.0406   9
   2 -13  -2 164.169 10.2577  14
  -2  13  -3 3.36947 3.23835  17
   2 -13  -3 3.80846 2.89778   9
   2 -13  -3 1.37288 2.25188  14
   2  13  -3 0.37744 2.08558   8
   2 -14   0 447.646 19.3276  14
  -2  14   0 486.491 21.4897  13
  -2 -14  -1 146.399 9.19986   9
   2 -14   1 149.563 9.65141  14
   2 -14  -1 149.435 9.79636  14
  -2  14   1 164.466 11.3061  13
   2 -14  -2 37.6203 4.98187  14
   3   0   0 1.47393 1.37536   1
  -3   0   0 0.18494 1.21500  20
   3   0   0 0.51515 1.45280   7
  -3   0   0 1.16199 1.36222  15
   3   0   0 0.96476 0.83022  14
   3   0  -1 567.492 18.1512  22
   3   0   1 583.285 19.1898   7
  -3   0   1 584.589 19.8648  20
  -3   0   1 553.823 18.5738  15
   3   0   1 634.302 19.9020   1
   3   0   2-1.48001 1.36855   5
  -3   0   2-0.81179 1.52043  20
   3   0   2 0.62063 1.16241   7
  -3   0  -2 0.27801 1.53585  15
  -3   0   2 1.95709 1.18378  15
  -3   0  -2-0.81001 2.78364  25
   3   0   2-0.53825 1.46089   1
   3   0   3 1455.85 45.3717   7
  -3   0   3 1487.41 46.8702  20
   3   0   3 1488.73 43.0127  19
  -3   0  -3 1510.42 46.4427  10
  -3   0  -3 1509.57 47.1154  15
   3   0  -3 1531.91 44.4395  12
   3   0   3 1642.03 47.5239   1
   3   0  -4 0.21868 1.05230  12
  -3   0   4 2.03905 1.66382  19
   3   0   4-0.27435 1.51566   7
   3   0   4 0.43914 0.93785  19
   3   0   4 1.61618 2.23213   1
  -3   0   4 0.71966 1.32528   6
  -3   0  -4-0.32189 1.74738  10
  -3   0   5 73.0239 6.32526  20
  -3   0   5 64.9382 5.60798  19
   3   0   5 62.7406 4.24415  19
  -3   0   5 59.6465 5.04701   6
   3   0   5 86.6471 7.46221   1
   3   0  -5 67.1137 4.96087  12
  -3   0   6 1.88329 2.60101  20
   3   0   6 0.22729 1.37947  19
  -3   0   6 1.84122 1.81171  18
   3   0   6 0.66808 3.42676   1
  -3   0   6-1.65175 2.14335   6
  -3   0   6 0.41577 2.41274  19
   3   0  -6 1.76107 2.01986  12
  -3   0   7 768.099 28.4282  19
   3   0   7 687.360 24.5929  19
   3   0  -7 714.522 25.6724  12
   3   0   7 808.558 37.7019   1
  -3   0   7 732.922 26.5476   6
  -3   1   0 1328.20 38.6253  11
   3  -1   0 1305.71 38.4694   7
  -3  -1   0 1297.42 38.9253  20
   3   1   0 1464.35 38.9319   1
   3  -1   0 1407.84 38.9694   5
  -3   1   0 1319.72 39.1041  15
  -3   1   0 1403.63 38.5495  25
   3  -1   0 1327.91 38.0890  14
   3   1   0 1349.48 37.8312  22
   3  -1   0 1376.82 37.7542  22
   3   1   1 667.585 22.0299   7
  -3   1   1 693.610 22.4528  11
   3   1  -1 674.078 21.1219  22
   3  -1   1 648.589 21.8882   7
  -3  -1   1 665.314 22.8046  20
   3  -1  -1 647.490 21.4724   7
   3   1   1 755.500 22.9670   1
  -3  -1  -1 640.519 22.7559  10
  -3   1   1 674.073 21.5859  15
   3   1   1 695.810 21.9269   5
   3  -1   1 663.299 21.3668  14
   3  -1   1 706.408 22.0825   5
  -3   1  -1 691.474 22.5316  25
  -3   1   2 1988.30 58.7847  11
   3   1   2 1990.35 58.1552   7
  -3   1   2 2054.35 59.3826  20
   3  -1   2 1905.66 57.9207   7
  -3  -1   2 1982.93 59.3634  20
   3  -1   2 1943.60 55.3489  19
  -3  -1  -2 2052.53 59.3860  10
  -3  -1   2 1908.26 57.4179  10
   3   1   2 1987.06 59.6506   1
  -3   1  -2 2000.96 59.3050  15
  -3   1   2 1965.17 56.5553  15
   3   1   2 1966.63 57.4858   5
   3  -1  -2 2017.13 57.2559  12
  -3   1  -2 2075.57 59.5452  25
  -3   1   3 170.110 9.01142  11
  -3   1   3 174.710 9.47816  20
  -3  -1   3 189.186 9.71748  20
  -3   1   3 185.985 8.65387  19
   3  -1   3 186.571 8.80968   7
   3  -1   3 216.484 10.6639   1
   3  -1   3 183.414 6.79597  19
   3   1   3 201.761 7.40118  19
  -3  -1  -3 207.368 9.84438  10
  -3  -1   3 185.539 7.67056  10
  -3   1  -3 184.604 9.72471  15
   3   1   3 182.726 9.72636   1
  -3   1  -3 197.170 10.4345  25
   3  -1  -3 182.501 8.07765  12
  -3   1   4 528.974 19.0426  19
   3   1   4 522.860 18.8559   7
   3  -1   4 505.594 16.5365  19
   3   1   4 482.528 16.7739  19
  -3  -1   4 511.572 18.4719   6
  -3  -1  -4 549.780 20.0123  10
  -3   1  -4 537.283 19.6147  10
  -3   1  -4 499.552 20.2515  15
   3   1   4 541.206 20.8057   1
  -3   1  -4 516.224 20.8357  25
   3   1  -4 496.643 17.8934  12
   3  -1  -4 528.214 18.2528  12
  -3  -1   5 453.488 18.8711  20
  -3   1   5 419.660 18.3467  20
  -3   1   5 408.614 17.1041  19
   3  -1   5 399.669 14.6394  19
   3   1   5 450.931 15.3877  19
  -3   1   5 409.342 16.3045   6
  -3  -1   5 438.391 16.9505   6
  -3   1  -5 442.287 19.4977  25
   3   1  -5 424.898 15.9495  12
   3  -1  -5 426.581 16.2519  12
   3   1   5 462.247 19.3488   1
  -3  -1   6 528.949 22.1556  19
  -3   1   6 552.654 21.7852  19
   3   1   6 532.370 19.3625  19
  -3  -1   6 536.384 21.2801  18
  -3   1   6 535.163 20.4350   6
  -3  -1   6 558.976 21.0819   6
   3  -1   6 634.859 31.2164   1
  -3   1   6 564.915 22.7808  20
   3  -1  -6 553.942 20.6530  12
   3   1  -6 562.577 20.1109  12
   3   1   7 25.7821 6.33760   1
  -3   1   7 18.9507 3.82568  19
   3   1   7 16.2212 2.81360  19
  -3  -1   7 14.5036 3.07422  18
  -3   1   7 21.3834 3.75531  18
  -3  -1   7 15.6993 3.32991   6
   3  -1  -7 17.4041 3.26841  12
   3   1  -7 19.0546 3.27636  12
  -3   2   0 1108.04 15.6004  11
   3  -2   0 974.365 13.1679   7
  -3  -2   0 1001.58 14.5958  20
   3  -2   0 977.755 14.2387   5
   3  -2   0 1006.36 13.7953  14
  -3   2   0 997.694 12.9662  25
   3   2   0 1055.88 15.5589   1
   3   2   0 952.370 11.9931  22
   3  -2   0 1003.26 11.5521  22
   3  -2  -1 262.332 6.61223   7
  -3   2   1 284.362 8.74763  11
  -3  -2   1 260.067 8.37873  20
   3  -2   1 256.334 7.38482   7
   3   2   1 277.783 7.97366   7
   3   2   1 284.959 8.96949   1
  -3  -2  -1 277.594 8.96897  10
  -3  -2   1 237.530 7.57328  10
   3   2   1 275.375 7.30589   5
   3  -2   1 260.902 7.16890  14
   3  -2   1 259.174 7.43466   5
  -3   2  -1 278.678 8.15013  25
  -3   2   1 255.138 5.67729  25
   3   2  -1 262.668 6.53266  22
  -3   2   2 5024.44 38.0641  11
   3   2  -2 4764.22 28.1518  22
  -3  -2   2 4648.81 37.9554  20
   3  -2   2 4745.83 33.3071   7
   3  -2   2 4607.32 16.6604  19
   3   2   2 4821.37 39.7745   1
  -3  -2   2 4634.83 31.1240  10
  -3  -2  -2 4734.06 38.6501  10
  -3   2  -2 5130.38 39.4325  15
   3  -2  -2 4843.82 14.5818   9
   3   2   2 4891.17 30.4002   5
  -3   2  -2 4634.63 31.1665  13
  -3   2   2 4482.49 17.3598  25
  -3   2  -2 4951.78 37.7504  25
   3  -2   2 4943.63 33.1772   5
  -3   2   3 48.2011 4.32560  11
  -3   2  -3 51.3589 5.24043  25
  -3  -2   3 49.3300 4.66856  20
  -3   2   3 51.4389 4.74303  20
   3  -2   3 44.8093 2.56789  19
   3   2   3 56.5492 5.18621   1
  -3  -2   3 49.1120 3.44545  10
  -3  -2  -3 55.2180 4.80650  10
  -3   2  -3 55.8153 4.97795  15
   3   2   3 55.5066 4.34150   7
   3  -2  -3 52.3043 3.77652  12
   3   2   4 912.512 28.5897   7
  -3   2   4 918.950 28.5070  19
   3  -2   4 838.887 25.6414  19
   3   2   4 842.468 26.5600  19
  -3  -2   4 838.830 27.9982   6
  -3  -2  -4 919.890 29.7842  10
   3   2   4 815.056 30.4972   1
  -3   2  -4 909.470 30.4475  15
  -3   2  -4 947.703 31.2318  25
   3   2  -4 832.873 27.1088  12
   3  -2  -4 907.792 27.9871  12
  -3   2   5 268.953 13.3367  20
  -3   2   5 258.613 11.8365  19
   3   2   5 241.719 10.2074  19
  -3  -2   5 236.755 11.4606  18
  -3   2   5 244.034 10.9956   6
  -3  -2   5 259.869 11.7239   6
  -3   2   5 222.916 11.8378  11
  -3   2  -5 254.557 13.2583  15
   3   2   5 283.319 13.8428   1
  -3   2  -5 281.584 14.3127  25
   3   2  -5 241.936 10.4963  12
   3  -2  -5 247.534 11.2215  12
  -3   2   6 1138.91 39.3853  20
  -3   2   6 1212.93 38.2535  19
   3   2   6 1069.18 35.4301  19
  -3  -2   6 1080.11 37.1709  18
  -3  -2   6 1140.53 37.3329   6
  -3   2  -6 1148.43 41.0906  25
   3   2  -6 1135.38 35.7448  12
   3   2   6 1181.73 40.6583   1
  -3  -2  -6 1081.70 36.8992  23
   3  -2  -6 1189.02 36.9691  12
  -3   2   7 9.70702 3.44204  20
  -3   2   7 7.83486 2.92067  19
   3   2   7 10.0311 2.44291  19
  -3  -2   7 5.62018 2.30080  18
  -3   2   7 7.45915 2.55775  18
   3   2   7 5.82172 3.69955   1
   3  -2  -7 4.36074 2.24482  12
  -3   3   0 1606.41 45.6086  11
   3  -3   0 1494.02 44.4741   7
  -3  -3   0 1453.63 46.0725  10
   3  -3   0 1505.58 45.0916   5
   3  -3   0 1537.01 45.3331  14
  -3   3   0 1556.26 44.6578  25
   3  -3   0 1560.64 43.7711  22
   3   3   1 1951.69 55.7406   1
   3  -3   1 1852.31 53.2490   7
  -3  -3   1 1777.96 53.8437  10
  -3  -3  -1 1851.88 54.9280  10
   3  -3  -1 1815.20 53.3647   5
   3   3   1 1796.17 52.8597   5
   3  -3   1 1768.40 53.3269  14
  -3   3  -1 1812.42 53.5434  25
  -3   3   1 1799.76 51.9557  25
   3  -3   1 1822.61 51.6432  22
   3   3  -1 1791.45 52.3787  22
   3  -3   1 1836.37 53.4002   5
   3   3   2 7.72946 1.69136   5
   3   3  -2 4.85087 1.25314  22
   3  -3   2 4.57269 1.60231   5
  -3   3  -2 5.96941 2.04549  13
  -3   3   2 8.63706 2.30205  11
   3   3   2 3.99555 1.93807   7
   3  -3   2 6.11450 1.72730   7
  -3  -3   2 2.81164 1.50741  10
  -3  -3  -2 5.26950 2.04165  10
   3  -3  -2 6.49749 1.06221   9
  -3   3   2 6.60543 1.12166  25
  -3   3  -2 4.78479 2.35841  25
   3   3   2 3.70608 2.37427   1
   3  -3  -2 4.97277 1.42618  12
   3   3  -3 1227.63 38.4807  22
  -3   3   3 1358.08 41.4839  11
   3   3   3 1352.88 40.1263   7
   3   3   3 1467.62 43.0568   1
  -3  -3   3 1184.50 38.2344  10
  -3  -3  -3 1361.00 41.7792  10
  -3   3  -3 1344.36 41.8037  15
  -3   3  -3 1438.22 41.8354  25
   3  -3  -3 1277.14 39.2612  12
  -3   3   4 1041.25 21.0842  20
   3   3   4 1050.03 17.8578   7
   3   3   4 1077.72 15.0167  19
   3   3   4 1109.46 23.1077   1
  -3  -3   4 1033.83 17.6817   6
  -3  -3   4 970.877 17.4733  18
  -3  -3  -4 1062.03 20.3040  10
  -3   3  -4 1080.29 21.5815  15
  -3   3  -4 1124.21 21.9947  25
   3  -3  -4 1035.29 17.0256  12
  -3   3   5 692.351 26.1702  11
   3   3   5 760.258 25.2114   7
   3   3   5 721.284 23.7061  19
  -3  -3   5 685.677 25.1970  18
  -3  -3   5 713.927 25.3421   6
   3   3   5 669.166 27.3455   1
  -3   3  -5 750.467 27.4192  15
  -3   3   5 730.287 27.1800  20
  -3   3  -5 747.063 27.9966  25
   3  -3  -5 734.283 24.9501  12
  -3   3   6 9.57485 3.27287  20
  -3   3   6 9.49751 3.09994  11
   3  -3  -6 11.0780 2.75145  12
   3   3   6 11.3552 2.43125  19
  -3  -3   6 11.4246 2.68483  18
  -3  -3   6 13.6344 2.76998   6
   3   3   6 12.0157 3.77165   1
  -3   3  -6 12.1792 4.77002  25
  -3  -3  -6 14.1091 3.17952  23
  -3   3  -7 356.809 15.7552  21
  -3   3   7 380.700 18.2610  20
  -3   3   7 383.303 17.4932  19
   3   3   7 365.127 15.4890  19
  -3  -3   7 372.992 16.6374  18
  -3   3   7 376.924 16.7582  18
  -3   3  -7 381.714 20.0965  25
  -3  -3  -7 345.902 16.1858  23
   3  -3  -7 375.761 16.3767  12
   3   3   7 413.695 19.8536   1
  -3   4   0 3520.40 97.7498  11
   3  -4   0 3339.61 96.6716   7
  -3  -4   0 3346.25 98.6068  10
   3  -4   0 3343.56 97.8691  14
   3  -4   0 3444.61 97.4112   5
   3  -4   0 3609.67 95.7655  22
  -3   4   1 1260.83 38.4341  11
  -3  -4   1 1188.64 38.0047  10
  -3  -4  -1 1283.44 39.3218  10
   3  -4   1 1211.99 37.5569   5
   3  -4  -1 1189.49 37.3962   5
   3  -4   1 1248.27 38.0504  14
  -3   4  -1 1258.54 38.3583  13
  -3   4  -1 1295.91 38.1825  25
   3  -4  -1 1313.65 36.6852  12
   3  -4   1 1238.63 35.5739  22
   3   4  -1 1226.34 36.6128  22
  -3   4   2 461.724 16.9747  11
  -3  -4   2 412.064 15.2275  10
  -3  -4  -2 421.406 16.8738  10
   3   4   2 426.940 13.5941  16
   3  -4  -2 440.822 13.6051   9
   3   4   2 441.146 14.7033   5
  -3   4  -2 417.241 15.8428  13
  -3   4  -2 439.593 16.5108  25
   3   4  -2 444.617 15.0721   8
   3  -4  -2 451.841 15.1224  12
   3   4   2 433.737 15.8792   7
   3   4   2 419.079 18.7293   1
   3   4  -2 416.724 14.5993  22
   3   4  -3 1355.88 42.9866  22
   3   4   3 1493.27 44.8545   7
   3   4   3 1549.70 47.9706   1
  -3   4  -3 1516.49 44.8894  13
  -3  -4   3 1300.16 44.0348   6
  -3  -4   3 1415.71 43.2382  10
  -3  -4  -3 1492.41 46.5072  10
  -3   4  -3 1533.93 46.2169  25
   3   4  -3 1574.38 44.5502   8
   3  -4  -3 1521.86 44.3525  12
   3   4   4 1429.04 43.9793   7
   3   4   4 1426.37 47.5482   1
   3   4   4 1434.15 42.8539  19
  -3  -4  -4 1367.83 45.2547  10
  -3  -4   4 1367.06 43.9687  18
  -3   4  -4 1528.33 46.6331  15
  -3   4  -4 1530.71 46.7598  25
   3  -4  -4 1446.89 43.9506  12
  -3   4   5 365.961 13.1591  11
  -3   4   5 357.233 13.5375  20
   3   4   5 386.695 11.5645   7
   3   4   5 363.336 9.93188  19
  -3  -4   5 344.677 11.2960  18
   3   4   5 361.140 14.4793   1
  -3  -4   5 371.040 11.8704   6
  -3   4  -5 376.430 13.8019  15
  -3   4  -5 418.326 15.0225  25
  -3   4   6 385.561 17.3907  11
  -3   4   6 370.474 17.7241  20
   3   4   6 358.501 15.0474  19
  -3  -4   6 372.863 16.0364  18
  -3  -4   6 382.690 16.4621   6
   3   4   6 388.560 18.9075   1
  -3   4  -6 402.594 19.2764  25
  -3  -4  -6 370.905 16.6733  23
   3  -4  -6 406.431 16.4911  12
  -3   4   7 620.138 25.6751  20
   3   4   7 605.337 22.6713  19
  -3  -4   7 585.218 23.4250  18
  -3   4   7 573.054 23.2114  18
   3   4   7 638.128 26.9227   1
  -3   4  -7 680.178 27.9887  25
  -3  -4  -7 590.080 23.8283  23
   3  -4  -7 645.790 23.9404  12
   3  -5   0 456.052 14.3320  22
  -3   5   0 478.898 16.6416  11
   3   5   0 481.860 14.3709   8
  -3  -5   0 420.251 16.6743  10
   3  -5   0 443.277 16.5625  14
   3  -5   0 425.451 15.7476   5
  -3   5   1 44.6718 4.01994  11
  -3  -5   1 49.3169 4.17837  10
  -3  -5  -1 45.8122 4.43716  10
   3  -5  -1 47.4835 3.02253   9
   3  -5   1 52.5339 4.18023  14
   3  -5  -1 50.0550 3.89431   5
   3  -5  -1 46.2747 4.00984  14
  -3   5  -1 46.0558 4.29045  13
   3   5  -1 54.5852 3.34691   8
   3  -5  -1 55.8703 3.43096  12
   3  -5   1 48.2675 3.85086   5
   3   5  -1 49.8569 3.37094  22
   3  -5   1 49.5163 2.63056  22
  -3   5   2 1860.85 54.6911  11
   3   5  -2 1676.49 51.7390  22
   3   5  -2 1845.97 52.5046   8
  -3  -5   2 1740.64 52.9884  10
  -3  -5  -2 1626.82 54.3298  10
   3   5   2 1756.59 50.9982  16
  -3   5  -2 1922.87 54.9530  25
   3  -5  -2 1885.74 51.2630   9
   3  -5   2 1752.39 53.7308  14
   3   5   2 1769.14 51.6863   5
  -3   5  -2 1899.26 54.2961  13
   3  -5  -2 1940.91 52.7103  12
   3   5   2 1785.63 53.5460   7
   3   5   3 200.337 9.37374   7
   3   5   3 191.867 11.9382   1
  -3   5   3 218.793 11.0267  11
  -3  -5   3 185.432 8.22255  10
  -3  -5   3 175.110 8.71065   6
  -3  -5  -3 185.848 10.1310  10
  -3  -5   3 176.197 8.55074  18
  -3   5  -3 180.226 10.0261  25
   3   5  -3 206.528 9.03834   8
   3  -5  -3 209.498 9.02496  12
  -3   5  -3 215.045 9.81458  13
   3   5  -3 172.129 7.76557  22
   3   5   4 216.612 10.2436   7
   3   5   4 241.468 13.5854   1
  -3   5  -4 222.744 11.9419  25
   3   5   4 223.892 9.73613  19
  -3  -5  -4 215.842 11.6012  10
  -3  -5   4 226.707 10.3947  18
  -3  -5   4 224.805 10.5851   6
  -3   5  -4 232.854 12.1366  15
   3   5  -4 241.015 10.7143   8
   3  -5  -4 220.778 10.3658  12
   3   5   5 0.54809 3.42007   1
  -3   5   5 1.36198 2.23358  20
  -3   5   5-1.32866 2.27169  11
   3   5   5-0.86968 1.88085   7
   3   5   5 1.29536 1.35519  19
  -3  -5   5 1.22949 1.44499  18
  -3   5  -5-2.91894 3.45764  25
  -3   5  -5-1.35303 2.61726  15
   3  -5  -5 0.95028 1.80925  12
  -3   5   6 507.584 21.5871  11
  -3   5   6 508.702 22.0698  20
   3   5   6 474.861 18.8332  19
  -3  -5   6 509.818 19.8806  18
   3   5   6 548.935 23.5338   1
  -3  -5   6 491.026 20.3531   6
  -3   5  -6 587.987 23.8823  25
  -3  -5  -6 499.277 20.8809  23
  -3   5   7 110.982 8.80179  11
  -3   5   7 93.3725 8.59862  20
   3   5   7 98.0297 7.12963  19
  -3  -5   7 87.8272 7.16340  18
  -3   5   7 93.0675 7.35200  18
   3   5   7 102.066 9.45201   1
  -3   5  -7 117.913 10.6778  25
  -3  -5  -7 99.7046 8.01136  23
   3  -5  -7 90.8476 7.52716  12
   3  -6   0 1.33588 0.84357  22
   3  -6   0 0.40701 1.51996   5
  -3   6   0 0.75842 1.44410  11
  -3  -6   0 1.22844 1.51106  10
   3  -6   0 1.68517 1.35156  14
  -3   6   0 0.29962 1.81853  13
   3   6   0-0.10985 0.83596   8
  -3   6   1 1125.73 36.0318  11
  -3  -6   1 1064.69 35.5431  10
  -3  -6  -1 1024.17 36.2234  10
   3   6   1 1118.54 33.5737  16
   3  -6  -1 1152.94 33.5105   9
   3  -6   1 1132.23 35.7943  14
   3  -6  -1 1072.77 35.6500  14
  -3   6  -1 1177.58 36.4967  13
   3   6  -1 1146.66 33.6162   8
   3  -6  -1 1204.27 33.7427  12
   3   6  -2 18.4535 2.43362   8
  -3   6   2 17.6388 2.83503  11
   3   6   2 15.2217 2.91674   7
  -3  -6   2 15.7504 2.41114   6
  -3  -6   2 16.5348 2.52928  10
   3   6   2 19.3735 1.98397  16
  -3   6  -2 19.6557 3.00022  13
  -3  -6  -2 19.1525 3.16251  10
  -3  -6   2 16.3905 2.40225   4
   3  -6  -2 24.3948 2.40542   9
   3  -6   2 17.7158 2.61723  14
   3  -6  -2 19.5856 2.41614  12
   3   6  -2 16.8390 2.10599  22
   3   6   3 283.871 12.3882   7
  -3   6   3 305.808 13.9145  11
  -3  -6  -3 285.843 13.9021  10
  -3  -6   3 284.808 12.1415   6
  -3   6  -3 326.209 13.4492  13
   3   6  -3 286.037 11.9598   8
   3  -6  -3 310.889 12.1672  12
   3   6   4 1.64043 1.92287   7
   3   6   4 0.74234 1.39042  19
  -3  -6  -4 0.83986 2.11046  10
  -3  -6   4 1.49911 1.84548   6
   3   6   4-1.68268 3.30540   1
  -3   6  -4 0.42244 2.80854  25
   3   6  -4 0.29031 1.63124   8
   3  -6  -4-0.28152 1.52824  12
  -3   6   5 1179.33 38.6611  11
  -3   6  -5 1049.79 37.7426  25
   3   6   5 1035.57 34.1642  19
  -3  -6   5 973.234 34.4194  18
  -3  -6   5 1060.33 35.4481   6
  -3   6  -5 1103.11 38.0248  15
   3   6  -5 1086.85 35.5382   8
   3  -6  -5 1151.48 35.5642  12
  -3   6  -6 15.2951 4.90742  25
  -3   6   6 7.79093 3.33445  20
  -3   6   6 4.49570 3.03927  11
   3   6   6 10.6550 4.41322   1
   3   6   6 8.19954 2.54936  19
  -3  -6   6 8.23443 2.30375  18
  -3  -6  -6 6.32643 3.01201  23
   3  -6  -6 8.34266 2.81350  12
  -3   6   7 43.0111 6.02287  11
  -3   6   7 40.0416 4.72571  18
  -3  -7   0 2799.00 82.5722  10
   3  -7   0 2658.95 81.7729  14
  -3   7   0 2694.53 82.3651  13
  -3   7   1 14.8873 2.78062  11
  -3  -7   1 13.0911 2.67626  10
  -3  -7  -1 15.5121 2.89079  10
   3   7   1 12.4688 1.90032  16
   3  -7  -1 15.1861 2.07553   9
   3  -7   1 9.94563 2.26287  14
   3  -7  -1 19.1265 2.86521  14
  -3   7  -1 12.5223 3.02778  13
   3   7  -1 12.9975 1.91773   8
   3  -7  -1 14.7569 1.90327  12
   3   7  -2 39.1228 3.45034   8
  -3   7   2 32.7375 4.09352  11
  -3  -7   2 34.9288 3.55844   4
  -3  -7   2 39.9961 3.82088  10
  -3   7  -2 42.9712 4.55665  13
  -3  -7  -2 39.7137 4.54742  10
  -3  -7   2 40.0134 3.59724   6
  -3   7  -2 55.4122 4.63158  17
   3   7   2 33.1844 2.84607  16
   3  -7  -2 38.3805 3.19279   9
   3  -7   2 31.8800 3.73278  14
   3  -7  -2 38.7848 3.32420  12
   3   7   3 71.6248 5.35589   7
  -3   7   3 61.1670 5.74348  11
  -3  -7   3 72.7676 5.07741   4
  -3  -7  -3 73.9951 6.37414  10
  -3  -7   3 54.7114 4.69712   6
   3  -7  -3 63.7679 4.40117   9
  -3   7  -3 69.2852 5.77285  13
   3   7  -3 65.8313 4.94899   8
   3  -7  -3 71.4743 4.93591  12
   3   7   4 1608.11 48.8639   7
  -3  -7  -4 1632.69 51.8890  10
  -3  -7   4 1580.24 49.3613   6
  -3   7  -4 1689.21 50.7270  13
   3   7  -4 1568.47 49.1878   8
  -3   7  -4 1549.37 51.6486  25
   3  -7  -4 1745.23 49.6303  12
  -3   7   5 2.91473 3.27614  11
   3   7   5 1.20778 1.45439  19
  -3  -7  -5 3.87826 2.65318  23
  -3  -7   5 0.72111 2.02701   6
  -3   7  -5 0.51767 3.23097  25
   3   7  -5 9.71794 2.83688   8
   3  -7  -5 2.74192 1.95877  12
   3   7   6 8.05848 4.35822   1
  -3   7   6 4.31190 3.36489  20
  -3   7   6 5.38822 3.40896  11
   3   7   6 4.46999 1.93480  19
  -3  -7   6 5.06417 2.00101  18
  -3   7  -6 6.68862 3.99546  25
   3   7  -6 0.41668 2.30421   8
  -3  -7  -6 1.43516 2.82107  23
   3  -7  -6 3.55755 2.26013  12
  -3   8   0 2502.33 70.3125  11
  -3  -8   0 2295.64 70.5081  10
   3   8   0 2287.29 67.8085  16
   3  -8   0 2348.02 70.2351  14
  -3   8   0 2376.77 70.9561  13
  -3   8   1 53.8243 5.02479  11
  -3  -8   1 44.6296 4.51474  10
  -3  -8   1 44.9648 3.58648   6
   3   8   1 48.9975 3.71846  16
   3  -8  -1 53.7044 3.96851   9
   3  -8   1 47.4308 4.58127  14
   3  -8  -1 45.4003 4.59924  14
   3   8  -1 51.7207 3.72703   8
  -3   8  -1 46.3448 4.99392  13
  -3   8   2 398.286 16.9198  11
  -3  -8   2 398.735 15.3588   4
  -3  -8   2 388.138 15.3732  10
  -3  -8  -2 412.805 17.4419  10
  -3  -8   2 398.184 14.7056   6
  -3   8  -2 413.496 16.4530  17
   3   8   2 354.896 13.8252  16
   3  -8  -2 408.860 14.5165   9
   3  -8   2 350.053 15.8359  14
   3   8  -2 386.842 14.6651   8
  -3   8  -2 393.816 16.9549  13
   3  -8  -2 440.559 14.6709  12
  -3   8   3 6.72792 2.79944  11
   3   8   3 2.26661 2.32987   7
  -3  -8  -3 8.01790 2.66854  10
  -3  -8   3 5.12798 2.00197   6
   3  -8  -3 4.14178 1.89003   9
  -3  -8   3 6.93032 2.09494   4
  -3   8  -3 8.80742 2.69713  13
   3   8  -3 7.04275 2.04728   8
   3  -8  -3 3.30923 1.77723  12
  -3  -8  -4 1323.82 43.2655  10
  -3  -8   4 1188.36 40.2418   6
   3   8  -4 1264.61 40.4549   8
  -3   8  -4 1349.91 42.2766  13
  -3   8  -4 1198.88 42.7723  25
   3  -8  -4 1328.14 40.6139  12
  -3   8   5 80.8728 7.85359  11
  -3   8  -5 65.5920 7.36777  25
   3   8  -5 62.7916 5.82345   8
  -3  -8  -5 59.7203 6.23770  23
   3  -8  -5 69.9481 5.94076  12
  -3   8   6 404.542 19.3093  11
   3   8   6 375.609 20.7168   1
   3   8   6 346.381 15.4622  19
  -3   8  -6 316.133 17.7461  25
   3   8  -6 368.448 16.6985   8
   3  -8  -6 374.871 16.6015  12
  -3   9   0 278.405 12.6795  11
  -3  -9   0 254.595 12.4573  10
   3   9   0 240.131 10.6051  16
  -3   9   0 255.960 13.0681  13
  -3   9   1 22.3289 3.72772  11
  -3  -9   1 30.3059 3.87105  10
   3   9   1 27.8160 3.05522  16
   3   9  -1 31.6260 3.38005  16
   3  -9  -1 33.5711 3.49559   9
   3   9  -1 30.4386 3.09547   8
   3  -9  -1 27.2237 3.78454  14
  -3   9  -1 31.3963 4.49749  13
  -3   9   2 1419.43 46.1491  11
  -3  -9   2 1387.04 43.9414   4
  -3  -9   2 1369.36 43.9905  10
  -3  -9  -2 1434.07 46.6329  10
  -3   9  -2 1501.99 45.8483  17
   3   9   2 1367.42 42.4453  16
   3  -9  -2 1476.14 43.2136   9
   3  -9  -2 1345.82 45.3400  14
   3   9  -2 1406.43 43.1334   8
  -3   9  -2 1523.12 46.7821  13
  -3   9   3 19.4403 3.74777  11
   3   9   3 21.8445 3.51916   7
   3  -9  -3 20.2878 2.95872  12
  -3  -9  -3 22.2529 3.86082  10
  -3  -9   3 18.5308 3.11420   6
   3  -9  -3 19.3515 2.98238   9
  -3  -9   3 19.1273 3.19301   4
  -3   9  -3 22.8803 4.13455  13
   3   9  -3 15.8811 2.78165   8
  -3  -9  -4 114.596 8.76682  10
  -3  -9   4 101.686 7.25845   6
   3   9  -4 126.290 7.77556   8
  -3   9  -4 128.391 9.17184  13
   3  -9  -4 131.984 7.81269  12
  -3   9   5 25.8162 5.16952  11
  -3   9  -5 8.10297 4.09146  25
   3   9  -5 18.1108 3.42153   8
  -3  -9  -5 11.0234 3.39597  23
   3  -9  -5 17.0201 3.29122  12
  -3  10   0 0.78459 2.31187  11
  -3 -10   0-0.40706 2.16988  10
   3  10   0 0.25391 1.49640  16
   3 -10   0 2.77532 2.07396  14
  -3  10   1 1189.52 38.0463  11
  -3 -10   1 1119.53 36.7935  10
   3  10   1 1052.51 34.6994  16
   3  10  -1 1049.57 34.8710  16
   3 -10  -1 1190.52 35.5521   9
   3 -10   1 1052.63 36.9393  14
  -3  10  -1 1159.18 38.6053  13
  -3  10   2 304.062 14.7966  11
  -3 -10   2 276.862 12.8927   4
  -3 -10  -2 276.820 14.2116  10
  -3  10  -2 297.213 14.3287  17
   3  10   2 269.179 11.6127  16
   3  10  -2 282.008 12.3412  16
   3 -10  -2 300.260 12.4359   9
   3  10  -2 283.557 12.2372   8
  -3  10  -2 310.589 15.0862  13
  -3  10   3 646.937 25.7462  11
  -3 -10  -3 605.213 24.8037  10
  -3 -10   3 614.061 23.1452   4
   3 -10  -3 641.876 22.3423   9
   3  10  -3 614.648 22.5205   8
  -3  10  -3 673.211 25.9078  13
  -3 -10  -4 5.16462 2.85657  10
  -3  10  -4 1.98284 3.21925  13
   3  10  -4 5.24603 2.51534   8
   3 -10  -4 6.88442 2.38216  12
  -3  10   5 972.934 36.0922  11
  -3 -10  -5 868.929 33.8457  10
   3  10  -5 877.185 31.9809   8
  -3  10  -5 949.405 34.5160  13
   3 -10  -5 997.934 32.6298  12
  -3  11   0 620.227 23.6420  11
  -3 -11   0 579.534 22.8353  10
   3  11   0 550.100 20.6714  16
   3 -11   0 571.718 22.9166  14
  -3  11   0 622.020 24.4287  13
  -3  11   1 18.7635 3.96831  11
  -3 -11  -1 21.1751 3.76098  10
   3  11   1 19.9965 3.12498  16
   3  11  -1 22.4621 3.08919  16
  -3 -11   1 22.6253 3.74127   4
   3 -11  -1 25.1127 3.50213   9
   3 -11   1 20.1571 3.62275  14
   3 -11  -1 16.4899 3.31965  14
  -3  11  -1 21.0828 4.47788  13
  -3  11   2 124.184 9.34159  11
  -3 -11   2 131.984 8.34870   4
  -3 -11  -2 114.656 8.80724  10
  -3  11  -2 126.820 9.18062  17
   3  11   2 123.733 7.21009  16
   3  11  -2 111.459 7.22510  16
   3 -11  -2 141.280 7.91642   9
   3 -11  -2 108.925 8.43569  14
  -3  11  -2 133.927 9.74004  13
  -3  11   3 85.0088 7.89313  11
  -3 -11  -3 91.1045 7.90725  10
  -3 -11   3 84.4415 6.67620   4
   3  11  -3 79.2135 6.04291  16
   3 -11  -3 77.4745 6.05149   9
   3 -11  -3 86.1886 7.68188  14
   3  11  -3 82.8907 6.22767   8
  -3  11  -3 88.5343 7.99302  13
  -3 -11  -4 368.147 17.7054  10
  -3 -11   4 352.192 16.2034   4
   3  11  -4 321.719 14.7176  16
   3  11  -4 347.143 15.4598   8
  -3  11  -4 388.884 18.2327  13
  -3 -11  -4 345.639 16.7594  23
  -3  12   0 177.699 10.9883  11
   3  12   0 146.146 8.60037  16
   3 -12   0 140.951 9.61864  14
  -3  12   0 165.950 11.1146  13
  -3 -12   1 407.095 17.0006   4
  -3  12   1 425.018 18.7888  11
   3  12   1 374.026 15.5150  16
   3  12  -1 351.936 15.3668  16
   3 -12   1 371.195 17.2181  14
   3 -12  -1 384.415 17.5341  14
  -3  12   2 49.8749 6.41315  11
  -3 -12   2 56.8115 5.58804   4
  -3  12  -2 68.1496 6.81238  17
   3  12   2 51.3243 4.78768  16
   3  12  -2 44.7440 4.63933  16
   3 -12  -2 61.6995 5.56270   9
   3 -12  -2 51.9037 5.94480  14
  -3  12  -2 62.0139 7.09471  13
  -3 -12   3 706.563 25.8159   4
   3 -12  -3 672.992 26.8437  14
   3  12  -3 661.838 24.5074   8
  -3  13   0 19.4787 4.41622  11
   3  13   0 18.2676 3.36042  16
   3 -13   0 20.3027 3.90740  14
  -3  13   0 15.4389 4.89850  13
   3  13   1 69.1558 5.81332  16
   3 -13   1 74.1871 6.99223  14
   3 -13  -1 81.6347 7.24874  14
   3  13   2 742.937 26.5674  16
   3 -13  -2 758.618 27.2551   9
   4   0   0 6460.62 179.454   7
  -4   0   0 6263.23 179.700  20
  -4   0   0 6318.96 179.839  15
   4   0   0 6475.71 179.753   5
   4   0   0 6615.17 178.025  22
  -4   0   1 0.91627 1.62805  20
   4   0  -1 0.23746 1.99390   7
   4   0   1-0.25826 1.56741   7
  -4   0   1-0.93396 1.71057  15
  -4   0  -1 1.59893 1.82652  15
   4   0   2 39.1652 3.95044   7
  -4   0   2 38.9565 4.43727  20
   4   0  -2 39.5284 3.28841  22
  -4   0   2 38.3851 3.38216  15
   4   0   2 40.4386 3.94196   5
   4   0   2 43.0006 4.67207   1
   4   0   3 0.26996 1.61483   5
  -4   0   3 0.80150 1.92827  20
   4   0   3 0.30444 1.65258   7
  -4   0  -3 0.38880 1.69217  10
   4   0   3-2.97291 2.22154   1
  -4   0   4 3121.09 100.282  20
  -4   0  -4 3286.56 99.9206  10
  -4   0   5 0.97739 2.00654   6
   4   0  -5 4.33372 1.82837  12
   4   0   5 1.39685 3.28407   1
  -4   0   6 2.79650 2.81218  20
   4   0   6 5.95898 5.58107   1
  -4   0   6 3.37654 2.69549   6
   4   0  -6 2.96922 2.14227  12
  -4   0   7 0.41664 2.52862   6
   4  -1   0 84.3666 5.55001   7
  -4   1   0 81.3519 5.72910  20
  -4  -1   0 90.1917 6.20584  10
  -4   1   0 89.9553 5.95445  15
   4  -1   0 82.5721 5.58785   5
   4   1   0 94.0366 5.97278   7
   4  -1   0 85.5507 4.76551  22
  -4   1   1 84.2381 5.77828  11
   4   1   1 90.1852 6.02174   7
   4  -1   1 95.5833 6.06589   7
  -4  -1   1 91.2547 6.33360  20
  -4   1   1 91.2076 6.38430  20
  -4  -1  -1 92.9764 6.60382  10
  -4  -1   1 96.1134 6.22769  10
  -4   1  -1 92.8979 6.53659  15
  -4   1   1 94.4806 5.78421  15
   4   1   1 95.9430 6.05415   5
   4   1   1 100.880 6.54889   1
   4  -1   1 100.571 6.11443   5
  -4   1  -1 83.6070 6.29396  25
   4   1  -1 102.714 5.36601  22
   4  -1  -1 96.9015 5.91944   7
   4  -1  -1 104.688 5.33705  22
  -4   1   2 910.022 31.6649  11
   4   1  -2 1018.63 30.1755  22
   4   1   2 1021.44 31.8504   7
  -4  -1   2 956.950 32.7780  20
  -4   1   2 896.082 32.6512  20
   4  -1   2 997.554 31.5245   7
   4  -1   2 984.121 34.5686   1
  -4  -1  -2 921.839 32.6952  10
  -4  -1   2 982.914 31.2394  10
  -4   1  -2 841.484 32.4460  15
  -4   1   2 974.043 30.0522  15
   4   1   2 1053.58 33.2999   1
   4   1   2 983.570 30.9883   5
  -4   1  -2 1024.45 33.0731  25
   4   1  -3 196.407 8.90217  22
  -4  -1   3 195.420 10.9249  20
   4   1   3 201.869 10.1511   7
  -4   1   3 191.976 10.9447  20
   4  -1   3 215.510 10.3210   7
   4   1   3 190.954 7.76453  19
   4  -1   3 252.205 13.5884   1
  -4  -1  -3 196.924 10.8778  10
  -4  -1   3 190.623 9.00639  10
  -4   1  -3 194.993 11.2705  15
  -4   1  -3 207.589 11.6093  25
   4   1   3 217.409 11.4947   1
   4   1   3 205.595 9.56358   5
  -4  -1   4 132.625 8.97795  20
  -4   1   4 122.520 9.00758  20
   4   1   4 126.359 8.03604   7
   4   1   4 122.647 5.98862  19
   4  -1   4 154.276 14.4344   1
  -4  -1  -4 128.394 8.80578  10
  -4   1  -4 134.095 9.02388  10
  -4   1  -4 137.065 9.62348  15
   4  -1  -4 137.891 7.42986  12
   4   1   4 136.347 9.67183   1
  -4   1   5 35.8062 4.19169   6
   4   1   5 30.2800 5.52706   1
  -4  -1   5 27.2394 3.77245   6
   4  -1   5 30.8313 7.86828   1
   4  -1  -5 28.4584 3.47071  12
  -4   1   6 243.248 13.8644  20
   4   1   6 271.980 15.7833   1
  -4  -1   6 234.988 12.3390  18
  -4   1   6 220.122 11.5528   6
  -4  -1   6 255.192 12.4381   6
   4  -1  -6 250.603 11.8012  12
   4   2   0 6.94745 1.57543  22
   4  -2   0 5.89361 1.37648  22
  -4   2   0 6.09125 2.11396  11
   4  -2   0 5.35518 2.06814   7
  -4  -2   0 9.02713 2.43718  10
  -4   2   0 7.03832 2.29958  15
   4  -2   0 8.98982 1.89070  14
  -4   2   0 5.46184 2.20997  25
   4  -2   0 6.71981 2.16165   5
   4  -2  -1 75.7210 4.52217  22
  -4   2   1 76.6136 5.54383  11
  -4  -2   1 68.0664 5.44729  20
   4  -2   1 69.8718 5.08103   7
  -4  -2  -1 73.0094 5.83170  10
  -4  -2   1 70.9673 5.44065  10
   4   2   1 83.7117 6.05195   1
   4  -2  -1 74.1724 5.41104   5
  -4   2  -1 65.6101 5.50096  15
  -4   2   1 67.9425 4.99783  15
   4   2   1 77.9035 5.29560   5
   4  -2   1 78.8953 4.91394  14
   4  -2  -1 85.7141 5.14054  14
   4  -2   1 69.1049 5.07604   5
  -4   2   1 68.8980 4.40690  25
  -4   2  -1 70.8446 5.53600  25
   4   2  -1 74.6252 4.52465  22
   4   2   1 73.6023 5.42853   7
  -4   2   2 1105.23 35.7367  11
   4   2   2 1087.62 35.2630   7
  -4  -2   2 1026.78 36.0527  20
  -4   2   2 1093.36 36.2802  20
   4  -2   2 1089.41 35.0078   7
  -4  -2   2 1091.86 34.7898  10
  -4  -2  -2 1127.74 36.8403  10
   4   2   2 1166.91 36.9859   1
  -4   2  -2 1064.51 36.3557  15
  -4   2   2 1074.02 33.6760  15
   4   2   2 1134.19 34.3209   5
  -4   2  -2 1132.25 36.2513  25
   4  -2   2 1090.58 34.7207   5
   4   2  -2 1082.19 33.5787  22
   4   2  -3 269.546 11.2605  22
  -4   2   3 254.996 12.8724  11
  -4  -2   3 282.387 13.7392  20
  -4   2   3 293.291 14.1267  20
   4  -2   3 283.339 12.7820   7
  -4  -2   3 275.358 11.5860  10
  -4  -2  -3 304.001 14.2834  10
  -4   2  -3 311.758 14.4809  15
   4   2   3 327.942 14.8181   1
  -4   2  -3 299.005 14.4538  25
   4   2   3 288.966 11.9745   5
  -4   2   4 16.6832 3.70746  20
  -4   2   4 13.3526 3.07188  11
   4   2   4 14.1680 3.08635   7
   4   2   4 15.8982 2.15508  19
  -4  -2  -4 13.8040 3.41490  10
  -4   2  -4 15.3229 3.73346  15
   4   2   4 22.7983 4.47148   1
   4  -2  -4 17.8430 2.73505  12
  -4   2   5 0.51411 2.74052  20
   4   2   5 0.37390 2.16988   7
   4   2   5 1.98954 1.48724  19
  -4   2   5 0.30792 1.92156   6
  -4  -2   5 1.72664 2.06578   6
  -4   2  -5 2.69651 3.03033  15
  -4   2  -5 5.15716 4.11487  25
   4   2   5-1.13439 2.72924   1
   4  -2  -5-0.32018 1.79919  12
  -4   2   6 485.217 22.3550  20
  -4  -2   6 472.037 20.2888  18
  -4  -2   6 503.781 20.5163   6
   4  -2  -6 524.498 20.0676  12
  -4   2   7 198.666 13.1314  20
  -4   3   0 520.222 18.6605  11
   4  -3   0 510.309 17.6986   7
  -4  -3   0 476.192 18.9440  10
   4  -3   0 482.164 17.8880  14
   4  -3   0 489.230 18.1586   5
  -4   3   0 502.783 17.6492  25
   4  -3   0 520.568 16.6935  22
   4   3   1 5.03275 2.54020   1
   4   3  -1 9.17104 1.70303  22
   4  -3  -1 8.12558 1.63778  22
   4  -3   1 10.0281 2.26105   5
  -4   3   1 9.22380 2.35094  11
   4   3   1 9.31792 2.47446   7
   4  -3   1 11.4542 2.42243   7
  -4  -3   1 12.1194 2.62954  10
  -4  -3  -1 10.3964 2.53221  10
  -4   3  -1 7.97747 2.47013  15
   4  -3   1 5.71261 1.72534  14
   4  -3  -1 7.17771 1.94673  14
  -4   3  -1 9.33597 2.72665  25
   4  -3  -1 9.31155 2.40641   5
   4   3   1 10.2361 2.40423   5
  -4   3   2 565.855 20.7614  11
   4  -3   2 547.630 19.6864   7
   4   3   2 576.239 21.4234   1
  -4  -3   2 501.937 19.1878  10
  -4  -3  -2 530.824 21.0392  10
  -4   3  -2 561.046 21.2692  15
   4   3   2 504.623 18.5141   5
  -4   3  -2 546.159 20.5399  25
   4  -3   2 548.532 19.5177   5
   4   3  -2 515.561 18.2322  22
   4   3  -3 136.128 7.06784  22
  -4   3   3 150.808 9.12210  11
   4   3   3 140.464 8.35395   7
  -4   3   3 140.407 9.40062  20
  -4  -3  -3 172.515 10.1517  10
   4   3   3 150.446 9.78560   1
  -4   3  -3 162.143 9.83228  15
  -4   3  -3 150.975 9.65827  25
   4  -3  -3 146.986 7.69957  12
   4   3   3 145.294 7.50535   5
   4   3  -4 340.270 13.4628  22
  -4   3   4 337.455 16.1916  11
  -4   3   4 351.189 16.8365  20
   4   3   4 359.109 15.2625   7
   4   3   4 376.045 13.3605  19
  -4  -3   4 328.286 14.5270   6
  -4  -3  -4 341.866 16.2022  10
   4   3   4 347.463 17.1252   1
  -4   3  -4 381.960 17.3741  15
  -4   3   5 11.0973 3.89133  20
   4   3   5 16.7256 3.49591   7
   4   3   5 14.0700 2.44132  19
  -4  -3   5 9.75913 2.67705  18
  -4  -3   5 15.4114 3.07932   6
  -4   3  -5 20.1098 4.64809  15
   4   3   5 19.8587 4.41203   1
  -4   3  -5 10.0457 4.59359  25
   4  -3  -5 18.1908 3.07885  12
  -4   3   6 226.213 13.8974  20
   4   3   6 226.990 10.6530  19
  -4  -3   6 214.718 11.8956  18
  -4  -3   6 205.478 11.8299   6
  -4   3  -6 225.581 15.0155  25
   4   3   6 238.648 14.8138   1
   4  -3  -6 257.504 12.3113  12
  -4  -3  -6 228.988 12.3622  23
  -4  -4   0 1181.09 39.8033  10
   4  -4   0 1206.98 38.6939  14
   4  -4   0 1179.05 38.5784   5
  -4   4   0 1230.61 38.0031  25
   4  -4   0 1255.88 36.7285  22
   4  -4  -1 42.1337 3.25302  22
  -4   4   1 50.8268 4.87223  11
   4   4   1 42.1249 4.91068   1
   4  -4   1 41.8611 3.94246   7
  -4  -4   1 46.4396 4.44038  10
   4   4   1 46.1689 4.07317   5
   4  -4  -1 38.8405 3.98389   5
   4  -4   1 39.4639 3.85325  14
   4  -4  -1 39.1766 3.90058  14
   4  -4   1 39.0211 3.92618   5
  -4   4  -1 41.9090 4.29232  25
   4   4   1 42.6452 4.54635   7
   4   4  -1 38.1178 3.30616  22
   4   4   2 6.98020 2.05894   5
   4   4  -2 5.98586 1.59215  22
   4  -4   2 4.38107 1.97088   5
  -4   4   2 7.37689 2.67635  11
  -4  -4   2 3.63506 1.88739  10
  -4  -4  -2 14.4840 3.03694  10
  -4   4  -2 2.74565 2.41924  15
  -4   4  -2 6.22932 2.79974  25
   4  -4  -2 4.42032 2.30768   5
   4   4   2 6.47258 3.10251   1
  -4   4   3 240.650 10.6598  11
   4   4   3 197.729 8.76492   7
   4   4   3 208.875 11.1018   1
  -4  -4  -3 197.290 10.0807  10
  -4   4  -3 219.664 10.5805  15
  -4   4  -3 251.171 11.0312  25
   4   4   3 205.856 7.36368   5
   4  -4  -3 219.215 8.07259  12
   4   4  -3 203.196 7.20761  22
   4   4  -4 774.844 25.8608  22
  -4   4   4 799.199 29.5287  11
   4   4   4 830.607 28.0575   7
  -4   4   4 770.975 29.8277  20
   4   4   4 810.000 25.9406  19
  -4  -4   4 710.597 26.8068  18
  -4  -4  -4 824.424 29.8751  10
   4   4   4 801.372 31.1381   1
  -4   4  -4 836.213 30.8599  15
   4  -4  -4 869.118 27.7409  12
   4   4  -5 3.80031 1.58434  22
  -4   4   5 0.53945 2.82369  20
   4   4   5 3.68657 2.20764   7
   4   4   5 4.86636 1.89753  19
   4   4   5 2.98536 3.18438   1
  -4  -4   5 3.93979 1.91200  18
  -4  -4   5 3.30584 2.19962   6
  -4   4  -5 7.70507 3.78881  15
  -4   4  -5 5.29768 4.56013  25
   4  -4  -5 4.43953 2.16208  12
  -4   4   6 4.13005 3.31695  20
  -4   4   6 3.55896 2.95246  11
   4   4   6 1.54735 1.79922  19
  -4  -4   6 4.83462 2.30376  18
  -4  -4   6 5.41476 2.70462   6
   4   4   6 5.27600 4.06077   1
  -4   4  -6 4.81252 5.13564  25
  -4  -4  -6 7.12922 2.81985  23
  -4   5   0 615.839 22.3750  11
  -4  -5   0 581.142 22.6626  10
   4  -5   0 602.287 22.0048  14
   4  -5   0 599.645 21.5401   5
  -4   5   0 630.958 21.2608  25
   4  -5   0 646.115 19.7505  22
   4  -5  -1 688.054 21.4298  22
  -4   5   1 741.280 25.2519  11
  -4  -5   1 615.726 23.2914  10
   4   5   1 647.113 22.2099   5
   4  -5   1 656.005 23.3566  14
   4  -5  -1 632.900 22.8633   5
   4  -5  -1 654.225 23.4602  14
  -4   5  -1 686.788 23.3858  25
   4  -5   1 652.983 22.9783   5
   4   5   1 694.389 26.0297   1
   4   5   2 11.9135 2.26897   5
   4   5  -2 6.72871 1.63343  22
  -4   5   2 10.0852 3.02154  11
   4   5   2 11.3277 2.76922   7
  -4  -5   2 7.65932 2.17261  10
  -4  -5  -2 8.58504 2.66413  10
   4   5   2 14.5186 3.88555   1
  -4   5  -2 8.78349 2.93872  25
   4  -5  -2 10.6398 2.72489   5
  -4   5   3 428.912 18.6757  11
   4   5   3 405.708 16.6940   7
   4   5   3 432.886 19.5252   1
  -4  -5   3 340.762 15.2800   6
  -4  -5  -3 396.335 17.7664  10
  -4   5  -3 430.821 18.4408  15
  -4   5  -3 423.719 17.9076  25
   4  -5  -3 436.283 15.8539  12
   4   5  -3 391.482 14.7593  22
  -4   5   4 288.157 12.6336  11
   4   5   4 282.679 10.7622   7
   4   5   4 282.161 9.02028  19
   4   5   4 296.376 14.1769   1
  -4  -5  -4 254.395 11.4973  10
  -4  -5   4 258.464 9.98503   6
  -4   5  -4 285.016 13.0782  15
   4  -5  -4 316.779 10.5359  12
   4   5  -4 272.483 8.71770  22
  -4   5   5 428.297 20.7213  20
   4   5   5 465.431 18.7006   7
   4   5   5 452.236 17.1310  19
  -4  -5   5 415.937 17.8609  18
   4   5   5 474.354 22.0829   1
  -4   5  -5 486.110 21.4907  15
  -4   5  -5 461.496 21.5401  25
   4  -5  -5 472.510 18.5498  12
  -4   5   6 43.0506 6.31836  20
  -4   5   6 32.8497 5.49019  11
   4   5   6 38.5452 4.28079  19
  -4  -5   6 29.9899 4.04982  18
   4   5   6 43.2140 6.99094   1
  -4  -5   6 31.0476 4.66729   6
  -4   5  -6 30.3624 6.55264  25
  -4  -5  -6 28.3864 4.66990  23
   4  -5  -6 35.8422 4.72750  12
  -4  -6   0 386.362 16.6100  10
   4  -6   0 392.466 16.3681  14
   4  -6   0 393.630 15.5434   5
  -4   6   0 437.411 15.9686  25
   4  -6  -1 581.715 18.6302  22
  -4   6   1 595.070 22.1859  11
  -4  -6   1 539.243 20.9301  10
   4   6   1 588.549 19.6475   5
   4  -6   1 527.899 20.7553  14
   4  -6  -1 535.705 21.0662  14
   4  -6  -1 538.525 19.9212   5
  -4   6  -1 625.093 21.4262  25
   4  -6   1 555.508 20.4132   5
   4   6   2 1909.94 64.8868   1
  -4   6   2 2357.02 65.2314  11
  -4  -6   2 1990.30 61.0953  10
  -4  -6  -2 1850.05 62.7275  10
   4  -6  -2 2041.57 62.3863  14
  -4   6  -2 2082.95 62.8344  13
  -4   6  -2 2175.05 62.9095  25
   4  -6  -2 2175.29 60.0574  12
   4   6  -2 1914.38 59.3970  22
   4   6   2 2040.89 62.0011   7
   4   6   3 394.832 16.3238   7
  -4   6   3 482.504 20.3163  11
   4   6   3 415.427 19.7695   1
  -4  -6   3 346.418 15.0487   6
  -4  -6  -3 341.796 16.9036  10
  -4   6  -3 403.623 17.0735  13
  -4   6  -3 408.803 17.7249  25
   4  -6  -3 418.302 15.3884  12
   4   6  -3 355.762 14.1097  22
  -4   6   4 177.193 11.5358  11
   4   6   4 174.734 9.73983   7
   4   6   4 180.990 12.5411   1
  -4  -6  -4 167.190 10.8208  10
  -4  -6   4 166.856 9.50989   6
  -4   6  -4 171.066 11.5288  15
   4  -6  -4 180.263 9.43871  12
  -4   6   5 325.556 14.8727  20
   4   6   5 326.595 11.9465   7
   4   6   5 306.970 10.3801  19
  -4  -6  -5 348.842 14.3756  10
   4   6   5 336.953 16.1250   1
  -4  -6   5 288.259 11.5028   6
  -4   6  -5 313.394 14.6441  15
  -4   6  -5 326.933 15.1512  25
   4  -6  -5 353.087 12.2770  12
  -4   6   6 601.915 26.0290  20
   4   6   6 573.067 21.6379  19
  -4  -7   0 487.575 19.9402  10
   4  -7   0 537.515 20.0254  14
   4  -7   0 483.008 18.3802   5
  -4   7   1 10.5272 3.05934  11
  -4  -7   1 9.46844 2.68302  10
   4   7   1 11.6392 1.94002  16
   4  -7   1 13.5916 2.90845  14
   4  -7  -1 8.43104 2.37587  14
  -4   7  -1 9.18980 2.82295  25
  -4   7   2 40.7954 5.32417  11
   4   7   2 36.6652 4.89335   7
  -4  -7   2 41.8494 4.30731  10
  -4  -7   2 34.0990 3.67955   6
  -4  -7  -2 45.9656 5.30839  10
   4  -7   2 45.3939 4.79790  14
   4  -7  -2 43.3674 4.77123  14
  -4   7  -2 50.6898 5.52488  13
  -4   7  -2 46.7976 5.30711  25
   4  -7  -2 41.3460 3.68064  12
  -4   7   3 1.04655 3.08370  11
   4   7   3 0.35630 2.45193   7
  -4  -7   3-0.89314 2.07139   6
  -4  -7  -3 1.45968 2.39379  10
   4   7   3-2.51104 3.40766   1
  -4   7  -3 0.85016 2.42793  13
  -4   7  -3 4.59546 3.01861  25
   4  -7  -3 0.27788 1.68646  12
  -4   7   4 298.668 16.0038  11
   4   7   4 284.566 13.4827   7
   4   7   4 314.878 17.3596   1
  -4  -7  -4 267.760 14.7625  10
  -4  -7   4 267.527 12.9352   6
  -4   7  -4 300.505 15.9302  15
   4  -7  -4 287.117 12.9521  12
   4   7   5 35.9177 6.55330   1
   4   7   5 25.0013 3.58752  19
  -4  -7  -5 37.1979 5.41508  10
  -4  -7   5 30.2446 4.28528   6
  -4   7  -5 26.3801 5.28229  15
  -4   7  -5 34.1041 6.15564  25
   4  -7  -5 31.3961 4.36312  12
  -4  -8   0 116.002 8.31648  10
   4  -8   0 137.762 8.74028  14
  -4   8   1 262.064 12.9641  11
  -4  -8   1 222.052 11.7349  10
  -4  -8  -1 244.029 12.7720  10
   4   8   1 235.513 9.82778  16
   4  -8   1 204.542 11.5408  14
   4  -8  -1 230.059 12.1224  14
  -4   8   2 267.583 14.0881  11
  -4  -8   2 261.274 12.3641  10
  -4  -8  -2 271.021 14.1916  10
  -4  -8   2 261.719 11.5934   6
   4  -8   2 266.795 13.3877  14
   4  -8  -2 289.938 13.9699  14
  -4   8  -2 303.439 14.7461  13
  -4   8  -2 264.317 13.6899  25
   4   8   2 273.833 13.2683   7
   4   8   3 43.0677 5.01306   7
  -4   8   3 46.7127 5.82394  11
  -4  -8  -3 48.1536 5.79694  10
  -4  -8   3 35.2908 4.17277   6
  -4   8  -3 44.7211 5.65176  13
  -4   8  -3 36.8021 5.41157  25
   4   8  -3 44.0152 4.40480   8
   4  -8  -3 47.0621 4.34991  12
  -4   8   4 134.971 11.3467  11
   4   8   4 118.815 8.08306   7
  -4  -8  -4 111.045 8.98930  10
  -4  -8   4 107.253 7.46125   6
   4   8  -4 118.144 7.71552   8
   4  -8  -4 115.501 7.59055  12
   4   8   5 240.771 11.9660  19
  -4  -8  -5 244.620 14.3662  10
  -4  -8   5 247.355 12.8255   6
  -4   8  -5 271.126 15.7143  15
  -4   8  -5 238.284 14.9609  25
   4  -8  -5 271.591 13.0717  12
  -4  -9   0 225.112 11.9292  10
   4   9   0 193.560 9.35595  16
   4  -9   0 198.597 11.3055  14
  -4   9   1 188.168 10.9235  11
  -4  -9   1 170.636 9.88921  10
  -4  -9  -1 152.463 10.0793  10
   4   9   1 144.650 7.69087  16
   4  -9   1 171.160 10.2375  14
   4  -9  -1 169.061 10.3478  14
  -4   9   2 115.827 8.93720  11
  -4  -9   2 117.636 7.73020  10
  -4  -9  -2 122.341 9.15842  10
   4  -9  -2 106.425 8.24879  14
  -4   9  -2 125.962 9.47576  13
   4   9   2 113.129 8.32610   7
  -4   9   3 27.6705 5.22363  11
   4   9   3 28.6230 4.47140   7
  -4  -9  -3 23.6650 4.53110  10
  -4  -9   3 24.0615 3.57359   6
   4  -9  -3 20.2390 4.22808  14
  -4   9  -3 26.3711 4.87783  13
  -4   9  -3 22.2288 4.93116  25
  -4   9   4 164.005 11.9195  11
  -4  -9  -4 139.014 10.3568  10
  -4  -9   4 127.779 8.23637   6
  -4   9  -4 121.987 10.4368  25
   4   9  -4 146.407 8.76190   8
   4  -9  -4 158.233 8.81765  12
   4  -9  -5 269.984 13.4220  12
  -4 -10   0 38.6605 4.97106  10
   4  10   0 34.3303 3.72837  16
   4 -10   0 38.7334 4.96965  14
  -4  10   1 306.834 15.1970  11
  -4 -10   1 273.317 13.4809  10
  -4 -10  -1 264.859 14.2619  10
   4  10   1 257.822 11.4138  16
   4  10  -1 255.432 11.7831  16
   4 -10   1 258.208 13.6315  14
   4 -10  -1 275.631 14.1874  14
  -4  10  -1 304.926 15.6801  13
  -4  10   2 112.392 9.17835  11
  -4 -10   2 103.520 7.35925   4
  -4 -10  -2 105.309 8.60910  10
   4 -10  -2 100.433 8.37311  14
  -4  10  -2 103.832 9.04372  13
   4  10   2 107.049 8.21289   7
  -4  10   3 93.3652 8.39382  11
  -4 -10  -3 71.1942 7.41555  10
   4 -10  -3 83.3448 7.69528  14
  -4  10  -3 78.9296 7.93274  13
  -4  10  -3 63.9700 7.59463  25
   4  10  -4 56.2467 5.49494   8
  -4 -11   0 106.600 8.39996  10
   4  11   0 102.305 6.79325  16
   4 -11   0 106.824 8.42059  14
  -4 -11   1 412.923 17.5204   4
  -4  11   1 449.587 20.0229  11
  -4 -11   1 407.769 17.9905  10
  -4 -11  -1 414.521 18.9864  10
   4  11   1 422.915 16.2749  16
   4  11  -1 376.896 16.0286  16
   4 -11  -1 418.038 19.0799  14
  -4  11   2 21.8983 5.00484  11
   4  11   2 17.5979 4.36810   7
  -4 -11  -2 21.5339 4.48635  10
   4  11  -2 16.6631 3.05533  16
  -4 -11   2 18.3624 3.54346   4
   4 -11  -2 18.5435 3.94922  14
  -4  11  -2 11.8969 4.82931  13
  -4 -12   0 159.735 10.5040  10
   4  12   0 147.570 8.61447  16
   4  12   1 170.148 9.25120  16
   5   0   0-0.46109 1.25146  22
   5   0   0 1.28562 2.13679   7
   5   0   0-0.33828 2.35365   5
   5   0  -1 137.951 8.19146   7
   5   0   1 130.599 8.23238   7
  -5   0   1 132.659 8.70132  20
  -5   0  -1 134.376 9.07002  10
   5   0   1 140.310 8.29813   5
   5   0  -1 143.997 7.30417  22
   5   0   2-0.65329 1.86572   5
  -5   0   2 3.08486 2.51714  20
   5   0   2-0.71305 2.13265   7
  -5   0  -2 3.27657 2.67357  10
   5   0  -3 15.2972 2.60384  22
   5   0   3 12.6224 2.92506   5
   5   0   3 17.1449 4.88549   1
  -5   0   3 11.3756 3.34288  20
   5   0   3 6.54263 2.81051   7
  -5   0  -3 11.5596 3.51187  10
   5   0  -4-0.59903 1.65502  22
  -5   0   4-2.70938 3.19350  20
   5   0   4 0.42195 2.37110   7
  -5   0  -4-2.68858 2.97076  10
   5   0   4-0.72853 3.50562   1
  -5   0   5 212.547 13.5943  20
  -5   0   5 193.600 11.0835   6
   5   1   0 488.101 18.9435   7
   5  -1   0 492.406 18.6707   7
  -5  -1   0 488.328 19.8397  10
  -5   1   0 479.335 19.3221  15
   5   1   0 491.373 18.9770   5
   5  -1   0 478.735 18.9157   5
   5  -1   0 469.388 17.1021  22
   5   1   1 954.182 31.1106   7
   5  -1   1 898.505 30.4943   7
  -5   1   1 891.111 31.5727  20
  -5  -1   1 931.520 31.2670  10
  -5   1   1 873.991 30.1827  15
  -5   1  -1 910.809 31.9323  15
   5  -1  -1 907.173 30.9796   5
   5   1   1 909.907 30.5226   5
   5  -1   1 840.609 30.2766   5
   5   1  -1 919.996 30.6927   7
   5  -1  -1 871.752 28.8622  22
   5   1   2 42.1977 4.79199   7
  -5  -1   2 49.3886 5.36091  20
  -5   1   2 32.8874 4.85023  20
   5  -1   2 44.6454 4.75525   7
  -5  -1  -2 46.6454 5.48929  10
  -5  -1   2 41.4217 4.57574  10
  -5   1  -2 36.2431 5.27857  15
   5   1   2 41.3475 4.40992   5
   5  -1   2 49.1154 4.85335   5
   5   1  -2 42.1487 3.98593  22
   5  -1  -2 38.5486 3.71033  22
  -5  -1   3 1134.44 35.9263  20
  -5   1   3 1193.48 37.0173  20
   5   1   3 1167.30 34.7625   7
   5  -1   3 1271.10 35.2299   7
  -5  -1  -3 1272.39 37.3867  10
  -5   1  -3 1176.53 36.8005  10
  -5   1  -3 1185.97 37.5466  15
   5   1   3 1153.18 33.4001   5
   5  -1   3 1215.52 34.2440   5
   5   1  -3 1171.69 32.4569  22
   5   1  -4 349.403 14.2375  22
   5  -1  -4 361.345 14.5194  22
  -5  -1   4 349.152 17.3887  20
  -5   1   4 373.687 18.0473  20
   5  -1   4 349.469 16.0736   7
  -5  -1  -4 360.830 17.5181  10
  -5   1  -4 332.418 17.1558  10
   5   1  -5 247.023 11.7631  22
  -5   1   5 259.826 15.0740  20
   5   1   5 233.119 13.2566   7
  -5   1   5 241.332 12.4420   6
  -5  -1   5 236.520 12.4961   6
   5  -2   0 320.059 13.9009   7
  -5  -2   0 359.361 15.7793  10
  -5   2   0 319.306 14.9231  15
   5   2   0 333.117 14.5394   5
   5  -2   0 323.614 14.5258   5
   5  -2   0 339.869 12.8490  22
   5   2   0 346.840 15.0637   7
   5   2   1 147.851 8.95242   7
   5  -2   1 146.763 8.49347   7
  -5   2   1 141.958 9.28692  20
  -5  -2   1 148.230 9.06093  10
  -5   2  -1 140.777 9.34260  15
  -5   2   1 134.260 8.22746  15
   5  -2  -1 139.194 8.63864   5
   5   2   1 143.993 8.40222   5
   5  -2   1 138.644 8.36014   5
   5   2  -1 135.594 7.35331  22
   5  -2  -1 143.889 7.33015  22
   5   2  -2 1.29325 1.54737  22
   5  -2  -2 2.26848 1.39266  22
   5   2   2-0.31156 2.07148   5
  -5  -2   2 1.30571 2.32016  20
  -5   2   2-0.45630 2.34063  20
   5   2   2 3.39333 2.65177   7
   5  -2   2-0.34948 1.79277   7
  -5  -2   2 1.07087 2.10371  10
  -5  -2  -2 1.93148 2.42685  10
  -5   2  -2-0.94664 2.47598  15
   5  -2  -3 226.054 10.2512  22
  -5  -2   3 208.044 12.2986  20
   5   2   3 212.132 11.5493   7
  -5   2   3 210.813 12.7467  20
   5  -2   3 210.753 11.4000   7
  -5  -2  -3 206.127 12.3616  10
  -5   2  -3 195.057 12.6085  15
   5   2   3 254.772 13.5913   1
   5   2   3 216.703 10.6277   5
   5   2  -3 197.346 9.81708  22
   5   2  -4 137.040 7.99448  22
  -5   2   4 140.233 10.6469  20
   5   2   4 156.925 9.83324   7
  -5  -2  -4 153.214 10.6667  10
  -5   2  -4 145.368 10.7234  10
  -5   2  -4 155.752 11.2718  15
   5   2   4 168.624 11.8013   1
   5   2  -5 36.8577 4.15849  22
  -5   2   5 45.5329 6.51444  20
   5   2   5 37.3942 5.20041   7
  -5   2   5 34.3082 4.61930   6
  -5  -2   5 33.1847 4.71044   6
   5   2   5 40.9549 6.68125   1
  -5  -3   0 1185.79 40.0006  10
   5   3   0 1195.47 38.8585   5
  -5   3   0 1200.03 39.6419  15
   5  -3   0 1174.69 38.8215   5
   5   3   0 1229.04 39.5756   7
   5  -3   0 1199.85 36.5074  22
   5   3   1 75.5573 6.61543   7
   5  -3   1 90.0162 6.34607   7
  -5  -3   1 79.9801 6.53797  10
  -5   3  -1 82.2904 7.04464  15
  -5   3   1 73.1097 6.24811  15
   5  -3  -1 85.5164 6.57352   5
   5   3   1 82.7129 6.22206   5
   5  -3   1 74.1705 6.09554   5
  -5   3  -1 76.1071 6.67373  25
   5   3  -1 85.8683 5.59408  22
   5  -3  -1 89.2037 5.46553  22
   5  -3  -2 813.002 26.6856  22
  -5   3   2 781.173 29.0761  11
   5   3   2 822.817 29.1605   7
  -5   3   2 814.239 30.2520  20
   5  -3   2 817.929 28.4607   7
  -5  -3   2 783.383 28.2732  10
  -5  -3  -2 820.162 30.5492  10
  -5   3  -2 839.611 30.6509  15
   5  -3  -2 827.346 28.7511   5
   5   3   2 812.094 27.7215   5
  -5   3  -2 867.511 30.3336  25
   5  -3   2 790.290 28.2487   5
   5   3  -2 787.560 26.7622  22
  -5   3   3 79.8824 7.18925  11
   5  -3  -3 84.3637 5.76513  22
  -5   3   3 81.7524 7.74142  20
  -5  -3  -3 85.0550 7.64603  10
  -5   3  -3 77.2488 7.53379  15
   5   3   3 78.2725 7.68222   1
  -5   3  -3 84.0156 8.19789  25
   5   3   3 86.2115 6.09516   5
   5   3  -3 76.4671 5.49851  22
  -5   3   4 565.726 24.8719  20
   5   3   4 557.323 22.7934   7
  -5  -3  -4 610.070 25.0871  10
  -5   3  -4 578.718 25.2773  15
   5   3   4 618.510 25.6751   1
  -5   3  -4 620.067 25.9511  25
   5   3  -4 537.344 20.6111  22
   5   3  -5 48.3345 4.61149  22
  -5   3   5 46.7918 6.73762  20
   5   3   5 53.7282 7.25782   1
   5   3   5 47.7045 5.82513   7
  -5  -3   5 39.1947 4.97611   6
  -5  -3   5 53.1443 5.34019  18
  -5   3  -5 35.8570 6.36731  15
  -5  -4   0 99.0864 7.63641  10
  -5   4   0 102.655 7.57333  15
   5  -4   0 105.278 7.28880   5
   5  -4   0 100.654 5.70054  22
  -5  -4   1 131.024 8.75189  10
  -5   4  -1 141.220 9.71522  15
  -5   4   1 142.485 8.97919  15
   5   4   1 137.498 8.22387   5
   5  -4  -1 139.500 8.63913   5
  -5   4  -1 153.933 9.26175  25
   5  -4   1 128.466 8.32346   5
   5   4   1 146.745 9.23606   7
   5  -4  -1 155.376 7.52542  22
   5  -4  -2 35.6241 3.51654  22
   5   4   2 24.2447 3.56429   5
   5  -4   2 30.7298 4.28365   5
  -5   4   2 30.1338 4.49597  11
  -5  -4   2 35.4774 4.29911  10
  -5  -4  -2 30.4192 4.61544  10
  -5   4  -2 32.0365 5.17573  25
   5  -4  -2 28.8833 4.32605   5
   5   4  -2 38.3743 3.70919  22
  -5   4   3 37.7669 5.19761  11
  -5   4   3 42.3717 5.82890  20
   5   4   3 42.9854 5.26386   7
   5   4   3 40.3328 5.88983   1
  -5  -4  -3 42.1343 5.53328  10
   5  -4  -3 42.4146 5.36180   5
  -5   4  -3 43.5698 6.01425  15
  -5   4  -3 50.8660 6.44508  25
   5   4   3 47.6617 4.61293   5
   5   4  -3 35.8417 3.75781  22
  -5   4   4 40.1701 5.85250  20
  -5   4   4 33.5545 5.05087  11
   5   4   4 39.0211 5.04054   7
   5   4   4 30.6063 5.89441   1
  -5  -4  -4 31.1894 5.15959  10
  -5   4  -4 31.2128 5.54888  15
  -5   4  -4 33.3996 6.28338  25
   5   4  -4 32.0422 3.78044  22
   5   4   5 132.871 9.33150   7
  -5  -4  -5 140.557 10.4548  10
  -5  -4   5 130.189 8.92523   6
  -5   4  -5 136.384 11.4635  15
   5   4   5 129.969 11.3303   1
  -5   4  -5 145.927 12.2852  25
   5   4  -5 126.046 7.73469  22
  -5  -5   0 279.070 14.3205  10
   5  -5   0 316.793 14.1630  14
   5  -5   0 287.842 13.6064   5
   5  -5   0 321.271 11.8488  22
  -5  -5   1 465.646 19.9684  10
  -5  -5  -1 480.516 20.9700  10
  -5   5  -1 525.354 21.7854  15
   5   5   1 526.246 19.3305   5
   5  -5   1 482.340 19.6603  14
   5  -5  -1 501.604 19.9428  14
   5  -5  -1 500.694 19.7511   5
  -5   5  -1 511.046 20.0870  25
   5  -5   1 504.162 19.7470   5
   5   5   1 496.409 20.6366   7
   5  -5  -1 542.845 18.0721  22
   5  -5  -2 1859.09 53.5592  22
   5   5   2 1777.44 56.3309   7
  -5   5   2 1942.19 58.0361  11
  -5  -5   2 1722.42 55.0946  10
  -5  -5  -2 1718.06 57.3268  10
   5  -5  -2 1772.08 55.3363   5
   5  -5  -2 1773.24 55.8380  14
   5   5   2 1823.30 54.0957   5
  -5   5  -2 1881.44 57.4145  25
   5   5  -2 1687.92 53.4593  22
  -5   5   3 184.057 11.5573  11
   5   5   3 167.978 10.4333   7
  -5  -5  -3 157.096 10.9460  10
   5   5   3 166.618 11.7767   1
  -5   5  -3 180.299 12.0925  15
   5  -5  -3 159.741 10.0925  14
  -5   5  -3 194.023 12.0671  25
   5   5  -3 165.190 8.66849  22
  -5   5   4 162.135 11.3313  11
   5   5   4 158.857 10.3057   7
  -5   5   4 179.583 12.1605  20
   5   5   4 171.059 8.65716  19
  -5  -5   4 140.299 9.15935   6
  -5  -5  -4 150.915 10.6991  10
   5   5   4 166.886 12.4681   1
  -5   5  -4 183.648 12.6168  15
  -5   5  -4 189.671 12.8344  25
   5   5  -4 160.249 8.60548  22
   5   5   5 497.078 20.8928   7
  -5  -5  -5 452.413 21.8406  10
  -5   5  -5 509.236 24.1589  15
   5  -5  -5 505.095 20.0061  12
   5  -6   0 30.8745 4.06049   5
  -5  -6   0 27.3517 4.16487  10
   5  -6   0 33.6082 4.30590  14
   5  -6  -1 29.1024 4.13214   5
   5  -6   1 29.9119 4.19488   5
  -5  -6   1 27.8875 4.16268  10
  -5  -6  -1 27.0053 4.24171  10
   5  -6   1 33.2942 4.26355  14
   5  -6  -1 32.8670 4.35301  14
  -5   6  -1 30.0331 4.38446  25
   5   6   1 29.1937 3.91574   5
   5  -6  -2 4.78693 1.87090  22
  -5   6   2 11.0532 3.61153  11
   5   6   2 11.0595 3.38400   7
  -5  -6   2 4.45847 2.22843  10
  -5  -6  -2 4.49856 3.08090  10
   5  -6  -2 5.16465 2.42378  14
  -5   6  -2 8.26502 3.65229  25
  -5   6   3 142.873 10.2446  11
   5   6   3 136.063 9.43986   7
   5   6   3 144.547 11.1686   1
  -5  -6   3 118.261 7.91288   6
  -5  -6  -3 114.776 9.35034  10
  -5   6  -3 146.773 11.0242  15
   5  -6  -3 133.904 9.23859  14
  -5   6  -3 150.358 10.4583  25
   5   6  -3 123.730 7.35204  22
  -5   6   4 20.2277 5.04512  20
  -5   6   4 18.4552 4.71968  11
   5   6   4 19.9380 4.19248   7
   5   6   4 14.9348 5.04404   1
   5   6   4 17.5068 3.05022  19
  -5  -6   4 23.1931 4.15482   6
  -5  -6  -4 14.3772 4.15665  10
  -5   6  -4 11.6007 4.46022  15
  -5   6  -4 15.6343 5.61273  25
   5   6   5 4.07863 2.97802   7
   5   6   5 2.57164 2.42479  19
  -5  -7   0 292.582 14.8788  10
   5  -7   0 313.874 14.8243  14
   5  -7   0 306.974 14.0251   5
  -5  -7   1 259.183 13.5887  10
  -5  -7  -1 260.367 14.2496  10
   5  -7   1 278.060 13.7766  14
   5  -7  -1 294.155 14.3441  14
  -5   7  -1 277.025 13.7703  25
   5   7   1 291.914 14.7540   7
  -5   7   2 1.12613 3.26910  11
   5   7   2 6.15751 3.40794   7
  -5  -7  -2 5.34695 3.20000  10
   5  -7  -2 4.22790 2.36307  14
  -5   7  -2 1.42808 3.45453  25
  -5   7   3 80.1421 8.37932  11
   5   7   3 100.685 7.88843   7
   5   7   3 93.4303 9.45109   1
  -5  -7  -3 71.4062 7.54701  10
  -5  -7   3 71.6839 6.18139   6
  -5   7  -3 83.8551 8.93937  15
   5  -7  -3 84.7202 7.48142  14
  -5   7  -3 80.7206 8.17763  25
   5   7   4 245.132 13.4168   7
  -5  -7  -4 248.658 14.8732  10
   5   7   4 297.980 17.2508   1
  -5  -7   4 244.887 12.7996   6
  -5   7  -4 282.640 16.4419  15
  -5   7  -4 280.895 16.1490  25
  -5  -8   0 45.3784 5.55940  10
   5  -8   0 47.8877 5.63446  14
   5   8   1 12.6721 4.05462   7
  -5  -8   1 21.9424 4.05737  10
  -5  -8  -1 18.2520 4.06519  10
   5  -8   1 15.2893 3.45827  14
   5  -8  -1 17.2527 3.70784  14
  -5   8  -1 17.5760 4.27741  25
  -5  -8  -2 383.924 19.1290  10
  -5  -8   2 385.531 16.3965   6
   5  -8  -2 433.982 19.3131  14
  -5   8  -2 383.607 18.6041  25
   5   8   2 433.330 18.8749   7
  -5   8   3 4.53750 3.76200  11
   5   8   3 0.91670 3.01119   7
  -5  -8  -3 1.18422 3.38234  10
  -5  -8   3 4.16739 2.69021   6
  -5   8  -3 1.30617 3.79027  15
   5  -8  -3-2.10906 3.29054  14
  -5   8  -3 3.43763 4.23864  25
   5   8   3 6.46056 4.82915   1
   5   8   4 60.5576 6.64380   7
  -5  -9   0 506.500 22.0068  10
   5   9   0 519.863 18.9474  16
   5  -9   0 525.584 22.2887  14
  -5  -9   1 134.210 9.36798  10
  -5  -9  -1 128.560 9.86606  10
   5  -9   1 138.983 9.73960  14
   5  -9  -1 154.658 10.3258  14
  -5   9  -1 115.246 9.05830  25
   5  -9  -2 451.512 20.6369  14
  -5   9  -2 420.938 20.4984  25
   5   9   2 464.483 20.3896   7
   5   9   3 88.1875 7.88626   7
  -5   9  -3 73.6569 8.19933  25
  -5 -10   0 6.15053 3.07272  10
   5  10   0 8.36447 2.30106  16
  -5 -10   1 6.67566 2.89594  10
   5  10  -1 2.80540 1.94810  16
  -5  10  -2 47.8457 6.68513  25
   6   0   0 14.7356 3.60653   7
  -6   0   0 12.4879 3.59961  10
   6   0   1-0.41268 2.50459   5
   6   0  -1 0.29828 1.46749  22
   6   0   1-0.42509 2.30753   7
  -6   0   1 0.48772 2.34675  10
   6   0  -1 1.33697 3.26490   5
   6   0   2 510.470 21.2897   7
  -6   0  -2 482.459 22.5280  10
  -6   0   2 517.813 21.2575  10
   6   0   2 505.831 20.6612   5
   6   0  -2 495.240 19.0102  22
   6   0   3-0.42123 2.76698   5
  -6   0   3-0.56874 3.08736  20
   6   0   3-0.94709 2.91481   7
  -6   0  -3-1.25051 2.93943  10
  -6   0  -4 7.87364 4.09983  10
   6   1   0 418.198 18.2316   7
  -6  -1   0 417.105 19.2312  10
   6   1   0 398.965 17.9775   5
   6  -1   0 417.709 18.3211   5
   6   1  -1 286.491 13.7507   7
   6   1   1 223.377 12.9055   7
   6  -1   1 262.079 13.1114   7
  -6  -1  -1 243.292 14.1540  10
  -6  -1   1 240.856 13.4504  10
   6  -1  -1 253.522 13.3787   5
   6   1   1 255.088 13.1332   5
   6   1  -1 249.267 11.4962  22
   6  -1  -1 232.157 11.1051  22
   6  -1  -2 0.31445 1.67692  22
   6   1   2 4.82004 3.02837   5
   6  -1   2 3.77295 2.65150   5
  -6   1   2 7.60379 3.43497  20
   6   1   2 1.37153 2.92931   7
   6  -1   2-0.43802 2.33541   7
  -6  -1  -2 2.97419 3.05148  10
  -6  -1   2 0.90796 2.55132  10
  -6   1  -2 3.54251 3.20535  10
   6  -1  -2-0.46638 3.54850   5
  -6  -1   3 97.8338 8.84906  20
  -6   1   3 95.1348 8.83844  20
   6   1   3 77.0287 7.35502   7
   6  -1   3 90.7810 7.90596   7
  -6  -1  -3 82.2277 8.44132  10
  -6   1  -3 101.961 9.34227  10
   6   1   3 96.6304 7.46110   5
   6   1  -3 91.3369 6.71936  22
   6  -1  -3 96.3630 6.83141  22
  -6  -1  -4 200.425 13.6455  10
  -6   1  -4 209.003 13.9238  10
   6   2   0 39.4044 5.27717   7
  -6  -2   0 36.2490 5.34217  10
  -6   2   0 49.9118 6.07502  15
   6  -2   0 42.4409 5.26165   5
   6   2   0 39.4693 5.41206   5
   6   2   1 698.901 27.1505   7
   6  -2   1 705.659 26.3342   7
  -6  -2   1 692.922 27.3774  10
  -6  -2  -1 694.338 28.2424  10
  -6   2  -1 704.879 28.1638  15
   6   2  -1 722.053 27.1992   5
   6  -2  -1 757.424 27.3814   5
   6   2   1 701.207 26.3593   5
   6  -2   1 675.030 26.3787   5
   6  -2  -1 701.594 24.4557  22
   6   2  -1 722.262 26.9800   7
   6   2   2 1807.93 56.4390   7
  -6   2   2 1686.95 57.6155  20
   6  -2   2 1789.49 55.7313   7
  -6  -2   2 1681.65 55.3544  10
  -6  -2  -2 1720.90 57.9571  10
  -6   2  -2 1677.58 58.0701  15
   6  -2  -2 1801.07 56.3662   5
   6   2   2 1761.37 54.8933   5
   6   2  -2 1714.01 53.4844  22
   6  -2  -2 1796.48 53.5061  22
  -6   2   3 377.519 19.5850  20
   6   2   3 433.873 19.0884   7
   6  -2   3 385.628 18.1459   7
  -6  -2  -3 409.327 20.1959  10
  -6   2  -3 387.434 20.0887  10
   6  -2  -3 425.289 19.0865   5
  -6   2  -3 393.182 20.5847  15
   6   2   3 389.554 17.1475   5
   6   2  -3 394.019 16.4143  22
   6  -2  -3 407.091 16.5063  22
   6  -3   0 2.14445 3.32279   5
   6   3   0 5.50907 3.52528   7
  -6  -3   0 3.18118 3.26446  10
  -6   3   0 3.41137 3.08293  15
   6   3   0 2.10368 2.76490   5
   6  -3  -1 2.57270 1.73760  22
   6  -3   1 2.99972 2.67582   5
   6   3  -1 5.06022 3.62613   7
   6   3   1 3.77484 3.52531   7
  -6  -3   1 6.43322 3.25204  10
  -6  -3  -1 3.40424 2.73175  10
  -6   3  -1 2.16604 3.19264  15
   6   3  -1 9.37862 3.96885   5
   6  -3  -1 7.97872 3.43445   5
   6   3   1-0.40269 2.80351   5
   6   3  -2 1.91864 1.88463  22
   6  -3  -2 1.55398 1.77536  22
   6   3   2 4.23276 2.87390   5
   6  -3   2-1.31238 2.76651   5
  -6   3   2 2.86347 3.10886  20
   6   3   2 7.22310 3.56229   7
   6  -3   2-1.29820 2.66364   7
  -6  -3   2-0.44646 2.63117  10
  -6  -3  -2-0.60730 2.78626  10
  -6   3  -2-0.60283 3.44328  15
   6  -3  -2-0.91589 3.42018   5
   6   3   3 88.2123 7.91445   7
  -6   3   3 94.0398 8.86309  20
  -6  -3  -3 85.8838 8.62018  10
   6  -3  -3 95.2411 8.21412   5
   6   3   3 97.8394 7.34001   5
   6   3  -3 76.3380 6.10881  22
   6  -3  -3 97.3061 6.73331  22
  -6  -4   0 1969.85 65.1377  10
  -6   4   0 2070.97 65.3059  15
   6   4   0 2068.68 63.7467   5
   6  -4   0 1994.42 63.6305   5
   6   4   0 2165.12 65.1099   7
   6  -4  -1 20.3058 4.15725   5
   6  -4  -1 21.0476 3.11619  22
   6  -4   1 19.5205 4.27583   5
   6   4  -1 20.4229 4.37875   7
   6   4   1 19.8785 4.45032   7
  -6  -4   1 16.5472 3.90105  10
  -6  -4  -1 12.0337 4.10480  10
  -6   4  -1 18.9052 4.52050  15
   6   4   1 20.5417 3.94145   5
   6  -4   2 48.9952 5.82047   5
  -6   4   2 42.6340 6.45150  20
   6   4   2 49.9610 6.27429   7
  -6  -4  -2 44.7947 6.23985  10
  -6   4  -2 46.8694 6.70796  15
   6   4   2 55.2753 5.55301   5
   6   4  -2 45.2026 4.76380  22
   6  -4  -2 50.2483 6.04084   5
   6  -4  -2 55.1273 4.92733  22
   6  -4  -3 75.3426 5.76474  22
  -6   4   3 66.9879 7.93802  20
  -6  -4  -3 51.0416 6.72026  10
   6  -4  -3 52.9061 6.44515   5
   6   4  -3 44.7338 4.71147  22
  -6  -5   0 106.161 8.73866  10
  -6   5   0 111.490 9.23231  15
   6   5   0 107.862 8.22821   5
   6  -5   0 108.112 8.32243   5
   6   5   0 117.354 9.29498   7
   6   5   1 194.884 12.0163   7
  -6  -5   1 162.090 10.6900  10
  -6  -5  -1 170.011 11.6476  10
  -6   5  -1 193.653 12.5779  15
   6   5   1 189.658 10.6621   5
   6  -5  -1 183.603 10.9556   5
   6  -5   1 175.205 10.9382   5
  -6   5   2 63.4473 7.72081  20
  -6  -5  -2 62.7606 7.29005  10
  -6   5  -2 81.7295 8.51828  15
   6  -5  -2 68.5886 6.89092   5
   6  -5  -2 77.5178 5.84477  22
   6  -5  -3 275.725 12.7662  22
  -6   5  -3 278.403 16.7317  25
  -6  -6   0 475.923 21.8826  10
  -6   6   0 546.804 23.6330  15
   6   6   0 542.871 21.4898   5
   6  -6   0 533.042 21.6318   5
   6   6   0 555.081 23.4013   7
   6  -6  -1 0.43307 2.70242   5
   6  -6   1 0.44876 2.91164   5
   6   6   1 4.13099 3.59279   7
  -6  -6   1-1.43211 2.59135  10
  -6  -6  -1 2.18962 2.69318  10
  -6   6  -1-1.81336 3.82245  15
  -6   6   1 2.54078 3.37839  15
   6  -6  -3-0.66755 2.08276  22
  -6   6  -3 3.97905 4.56371  25
   6  -7   0 31.0093 5.04027   5
  -6  -7   0 36.6870 5.40377  10
  -6   7   0 26.0719 5.33153  15
  -6  -7   1 13.9539 3.81026  10
  -6   7   1 14.0102 4.40386  15
   0   0   0    0.00    0.00   0

TITL MY_DIAMOND_1_inc_released_DC in Pbnm
REM Pbnm (#62 with fixed user cell!)
CELL 0.71073   4.750980  10.198292   5.980978  90.0000  90.0000  90.0000
ZERR    2.00   0.000175   0.000366   0.000210   0.0000   0.0000   0.0000
LATT  1
SYMM -x, y+1/2,-z+1/2
SYMM  x+1/2,-y,-z
SYMM -x+1/2,-y+1/2, z+1/2
SFAC O Mg Si Fe Ni
UNIT 8.00 3.66 2.00 0.32 2.00
TREF
HKLF 4
END
;
_shelx_hkl_checksum    9999
